# Supplementary material
Source: PubMed Central journal article supplement (PMC3556698)

Supporting Information

© Wiley-VCH 2012

69451 Weinheim, Germany

**Thiacycloalkynes for Copper-Free Click Chemistry\*\***

*Gabriela de Almeida, Ellen M. Sletten, Hitomi Nakamura, Krishnan K. Palaniappan, and Carolyn R. Bertozzi\**

anie\_201106325\_sm\_miscellaneous\_information.pdf

## Table of Contents

|                                                                                |     |
|--------------------------------------------------------------------------------|-----|
| General synthetic procedures.....                                              | S3  |
| Synthesis of thiaOCT.....                                                      | S3  |
| NMR kinetics of thiaOCT (Figure S1).....                                       | S7  |
| Synthesis of thiaDIFBO (Scheme S1).....                                        | S8  |
| NMR kinetics of thiaDIFBO (Figure S2).....                                     | S11 |
| Synthesis of TMTH (Scheme S2).....                                             | S11 |
| NMR kinetics of TMTH (Figures S3-S4).....                                      | S14 |
| Synthesis of <b>11</b> (Scheme S3).....                                        | S16 |
| TMTH stability to D <sub>2</sub> O and PBS (Figure S5).....                    | S19 |
| TMTH reactivity with azides and glutathione in PBS (Figure S6).....            | S21 |
| Western blot competition experiment (Figures S7-S9).....                       | S22 |
| Barstar expression and LC-MS analysis of protein samples.....                  | S24 |
| Synthesis of thiaOCT-biotin (Scheme S4).....                                   | S25 |
| Procedure for cell labeling.....                                               | S26 |
| Cell labeling and toxicity of thiaOCT-Biotin (Figures S10-S14).....            | S27 |
| <sup>1</sup> H, <sup>13</sup> C, <sup>19</sup> F NMR Spectra of Compounds..... | S32 |

## General Procedures

All chemical reagents were purchased from Sigma-Aldrich, Acros, or TCI chemicals and used without purification unless noted otherwise. Solvents were purified as described by Pangborn *et al.*<sup>[1]</sup> In all cases, magnesium sulfate or sodium sulfate were used as drying agents and solvent was removed by reduced pressure with a Buchi Rotovapor R-114 equipped with a Welch self-cleaning dry vacuum. Non-volatile products were further dried by reduced pressure with an Edwards RV5 high vacuum. Thin layer chromatography was performed with EMD 60 Å silica gel plates. Unless otherwise specified,  $R_f$  values are reported in the solvent system the reaction was monitored in. Flash chromatography was performed using Silicycle® 60 Å 230-400 mesh. All  $^1\text{H}$ ,  $^{13}\text{C}$ , and  $^{19}\text{F}$  NMR spectra are reported in ppm and referenced to solvent peaks. Spectra were obtained on Bruker AV-300, AVB-400, AVQ-400, DRX-500, or AV-500, AV-600 instruments. High resolution electron ionization (EI) and electrospray ionization (ESI) mass spectra were obtained from the UC Berkeley Mass Spectrometry Facility.

## Experimental Procedures

### (Hepta-1,6-dien-4-yloxy)triisopropylsilane (12).

NaH (60 % w/w in mineral oil, 0.46 g, 12 mmol, 3.3 equiv) was dissolved in THF (5.0 mL, anhydrous) and cooled to 0 °C. To this mixture, hepta-1,6-dien-4-ol (0.50 mL, 3.5 mmol, 1.0 equiv) was added dropwise and the mixture was stirred at 0 °C. After 30 min, triisopropylsilyl chloride (1.5 mL, 7.0 mmol, 2.0 equiv) was added to the reaction mixture. The reaction was warmed to rt and stirred overnight. The following day, the reaction was quenched with an aqueous solution of saturated ammonium chloride (8 mL). The product was extracted into dichloromethane (3 x 10 mL) and the combined organics were dried with  $\text{MgSO}_4$ , decanted and evaporated to dryness. The crude product was purified by silica gel chromatography (hexane) to give desired product in quantitative yield (930 mg, 3.5 mmol).  $R_f = 0.95$  in 3:1 hexanes/EtOAc.  $^1\text{H}$  NMR (500 MHz,  $\text{CDCl}_3$ ):  $\delta$  5.84 (ddd,  $J = 16.3, 13.9, 7.2$  Hz, 2H), 5.06-5.03 (m, 4H), 3.91 (p,  $J = 5.8$  Hz, 1H), 2.34-2.28 (m, 4H), 1.07-1.04 (m, 21H). This compound was previously reported by Livinghouse and coworkers.<sup>[2]</sup>

### Triisopropyl((1-(oxiran-2-yl)pent-4-en-2-yl)oxy)silane (13).

(Hepta-1,6-dien-4-yloxy)triisopropylsilane **12** (2.4 g, 9.0 mmol, 1.0 equiv) was dissolved in dichloromethane (74 mL). To this solution, an aqueous solution of saturated sodium bicarbonate (124 mL) and acetone (7.4 mL, 0.10 mol, 11 equiv) was added and the reaction mixture was cooled to 0 °C. To the vigorously stirring reaction mixture, oxone (22 g, 36 mmol, 4.0 equiv) dissolved in water (87 mL) was added dropwise using an addition funnel. The reaction mixture was slowly warmed to rt and stirred overnight. The organic layer was separated from the aqueous layer. The aqueous layer was extracted with dichloromethane (2 x 100 mL). The combined organics were dried with  $\text{MgSO}_4$ , decanted and evaporated to dryness to give crude mixture of unreacted starting material, desired product, and diepoxidized byproduct. The crude product was purified by silica gel

chromatography (100:1 to 10:1 hexane/EtOAc). This procedure yielded desired product as a 1:0.8 mixture of two diastereomers (1.1 g, 2.9 mmol, 32 %) plus some recovered starting material and ((1,3-di(oxiran-2-yl)propan-2-yl)oxy)triisopropylsilane.  $R_f = 0.8$  in 3:1 hexanes/EtOAc.  $^1\text{H NMR}$  (500 MHz,  $\text{CDCl}_3$ ): major diastereomer  $\delta$  5.86-5.73 (m, 1H), 5.08-5.02 (m, 2H), 4.11-4.08 (m, 1H), 3.07-3.03 (m, 1H), 2.77 (t,  $J = 4.9$  Hz, 1H), 2.46-2.31 (m, 3H), 1.76-1.61 (m, 2H), 1.07-1.03 (m, 21H); minor diastereomer  $\delta$  5.86-5.73 (m, 1H), 5.08-5.02 (m, 2H), 4.11-4.08 (m, 1H), 3.07-3.03 (m, 1H), 2.73 (t,  $J = 4.9$  Hz, 1H), 2.46-2.31 (m, 3H), 1.76-1.61 (m, 2H), 1.07-1.03 (m, 21H).  $^{13}\text{C NMR}$  (125 MHz,  $\text{CDCl}_3$ ): major diastereomer  $\delta$  134.8, 117.8, 70.5, 50.0, 47.3, 42.8, 40.1, 18.5, 13.0; minor diastereomer  $\delta$  135.0, 117.8, 70.6, 49.6, 48.1, 42.0, 39.7, 18.6, 12.9. HRMS (ESI): calcd for  $\text{C}_{16}\text{H}_{32}\text{O}_2\text{NaSi}^+ [\text{M} + \text{Na}]^+$ , 307.2064; found, 307.2061.

#### **5-(oxiran-2-yl)-4-((triisopropylsilyl)oxy)pentyl ethanethioate (14).**

Triisopropyl((1-(oxiran-2-yl)pent-4-en-2-yl)oxy)silane **13** (660 mg, 2.3 mmol, 1.0 equiv) was dissolved in dichloroethane (20 mL). To this solution, thioacetic acid (550  $\mu\text{L}$ , 7.7 mmol, 3.3 equiv) and azobisisobutyronitrile (AIBN) (130 mg, 0.79 mmol, 0.34 equiv, recrystallized from methanol) were added. The reaction mixture was heated to reflux for 2 h at which point the mixture was cooled to rt. The organic layer was washed with an aqueous solution of saturated sodium bicarbonate (2 x 20 mL) and water (20 mL). The aqueous layer was extracted with dichloromethane (25 mL) and the combined organics were dried with  $\text{MgSO}_4$ , decanted and evaporated to dryness. The crude product was purified by silica gel chromatography (90:1 to 25:1 hexane/EtOAc) to yield the desired product as a 1:0.4 mixture of two diastereomers (720 mg, 2.0 mmol, 87 %).  $R_f = 0.6$  in 4:1 hexanes/EtOAc.  $^1\text{H NMR}$  (500 MHz,  $\text{CDCl}_3$ ): major diastereomer  $\delta$  4.05-4.01 (m, 1H), 3.03-3.01 (m, 1H), 2.87-2.85 (m, 2H), 2.77 (t,  $J = 4.5$ , 1H), 2.48-2.43 (m, 2H), 2.32 (s, 3H), 1.65-1.58 (m, 6H), 1.07-1.03 (m, 21H); minor diastereomer  $\delta$  4.05-4.01 (m, 1H), 3.03-3.01 (m, 1H), 2.87-2.85 (m, 2H), 2.75 (t,  $J = 4.7$ , 1H), 2.48-2.43 (m, 2H), 2.32 (s, 3H), 1.83-1.65 (m, 6H), 1.07-1.03 (m, 21H).  $^{13}\text{C NMR}$  (150 MHz,  $\text{CDCl}_3$ ): major diastereomer  $\delta$  195.9, 70.1, 49.6, 47.4, 39.9, 36.6, 30.6, 29.3, 25.0, 18.1, 12.6; minor diastereomer  $\delta$  195.5, 70.0, 48.9, 46.8, 39.4, 35.7, 30.6, 29.3, 24.7, 18.1, 12.5. HRMS (ESI): calcd for  $\text{C}_{18}\text{H}_{36}\text{O}_3\text{NaSSi}^+ [\text{M} + \text{Na}]^+$ , 383.2047; found, 383.2048.

#### **5-((triisopropylsilyl)oxy)thiocan-3-ol (15).**

$\text{NaH}$  (60 % w/w in mineral oil, 20 mg, 0.50 mmol, 8.9 equiv) was added to a round-bottom flask followed by slow addition of ethanol (10 mL). 5-(oxiran-2-yl)-4-((triisopropylsilyl)oxy)pentyl ethanethioate **14** (20 mg, 0.056 mmol, 1.0 equiv) dissolved in ethanol (5.0 mL) was added dropwise and the reaction mixture was heated to reflux. After 3 h, the reaction mixture was cooled to rt and the ethanol was removed by rotary evaporation. The viscous liquid was dissolved in dichloromethane (20 mL), and the organic layer was washed with an aqueous solution of saturated ammonium chloride (25 mL). The aqueous layer was extracted with dichloromethane (2 x 20 mL) and the combined organics were dried with  $\text{MgSO}_4$ , decanted and evaporated to dryness. The crude product was purified by silica gel chromatography (12:1 hexane/EtOAc). This procedure resulted in 13 mg of desired product as a 1:0.85 mixture of two diastereomers



(0.040 mmol, 72 %).  $R_f = 0.5$  and  $0.45$  in 3:1 hexanes/EtOAc.  $^1\text{H NMR}$  (500 MHz,  $\text{CDCl}_3$ ): mixture of diastereomers  $\delta$  4.24-4.19 (m, 1H, 1H'), 4.17- 4.13 (m, 1H), 3.93 (bs, 1H'), 3.51 (bs, 1H'), 3.03 (dd,  $J = 15.1, 5.6$  Hz, 1H'), 2.89 (qd,  $J = 15.2, 4.4$  Hz, 2H), 2.73- 2.67 (m, 2H, 1H'), 2.64- 2.53 (m, 1H, 1H'), 2.36 (dt,  $J = 14.9, 2.6$  Hz, 1H'), 2.25 (ddd,  $J = 14.4, 9.0, 2.2$  Hz, 1H), 2.20-2.13 (m, 1H'), 2.08-1.98 (m, 1H, 2H'), 1.96-1.84 (m, 2H), 1.80-1.50 (m, 2H, 3H'), 1.03 (m, 21H, 21H').  $^1\text{H NMR}$  (500 MHz,  $\text{CDCl}_3$ ): major diastereomer  $\delta$  4.21 (m, 1H), 4.15-4.16 (m, 1H), 2.89 (qd,  $J = 15.2, 4.4$  Hz, 2H), 2.72-2.68 (m, 2H), 2.60-2.56 (m, 1H), 2.25 (dd,  $J = 12.0, 7.5$  Hz, 1H), 2.03 (dd,  $J = 12.1, 3.2$  Hz, 1H), 1.93-1.89 (m, 2H), 1.74-1.58 (m, 2H), 1.07-1.03 (m, 21H);  $^{13}\text{C NMR}$  (150 MHz,  $\text{CDCl}_3$ ): major diastereomer  $\delta$  68.5, 67.1, 40.7, 39.4, 34.8, 33.3, 24.6, 18.1, 12.3 HRMS (ESI): calcd for  $\text{C}_{16}\text{H}_{34}\text{O}_2\text{NaSSi}^+ [\text{M} + \text{Na}]^+$ , 341.1941; found, 341.1941.

### 5-((triisopropylsilyl)oxy)thiocan-3-yl pivalate.

5-((triisopropylsilyl)oxy)thiocan-3-ol **15** (231 mg, 0.726 mmol, 1.0 equiv) was dissolved in pyridine (11.5 mL, anhydrous). To this solution, pivaloyl chloride (350  $\mu\text{L}$ , 2.9 mmol, 3.9 equiv) was added. The reaction mixture was then warmed to 35 °C and stirred overnight. The reaction was cooled to rt and evaporated to dryness. The crude product was purified by silica gel chromatography (25:1 hexane/EtOAc) to afford the desired product in 80 % yield as a 1:1 mixture of diastereomers (243 mg, 0.581 mmol).  $R_f = 0.8$  in 3:1 hexane/EtOAc.  $^1\text{H NMR}$  (500 MHz,  $\text{CDCl}_3$ ):  $\delta$  5.25-5.19 (m, 1H), 4.83-4.79 (m, 1H), 4.32-4.25 (m, 1H), 4.16-4.11 (m, 1H), 2.95 (dd,  $J = 15.1, 4.8$  Hz, 1H), 2.79-2.63 (m, 6H), 2.61-2.55 (m, 1H), 2.30 (ddd,  $J = 14.6, 8.6, 2.8$  Hz, 1H), 2.21 (dt,  $J = 14.3, 10.1$  Hz, 1H), 2.15 (ddd,  $J = 14.7, 7.1, 1.9$  Hz, 1H), 2.08-2.03 (m, 1H), 1.99-1.76 (m, 6H), 1.74-1.61 (m, 2H), 1.14 (s, 18H) 1.04-1.01 (s, 21H).  $^{13}\text{C NMR}$  (125 MHz,  $\text{CDCl}_3$ ):  $\delta$  177.9, 1778.8, 71.9, 70.5, 68.8, 68.7, 42.0, 39.1, 39.0, 37.6, 37.0, 36.4, 34.6, 34.1, 33.9, 33.3, 27.5, 27.4, 24.6, 23.2, 18.5, 18.6, 12.8, 12.7. HRMS (ESI): calcd for  $\text{C}_{21}\text{H}_{42}\text{O}_3\text{NaSSi}^+ [\text{M} + \text{Na}]^+$ , 425.2516; found, 425.2513.

### 5-hydroxythiocan-3-yl pivalate (**16**).

5-((triisopropylsilyl)oxy)thiocan-3-yl pivalate (243 mg, 0.581 mmol, 1.0 equiv) was dissolved in THF (5.6 mL, anhydrous). The solution was cooled to 0 °C and tetrabutylammonium fluoride (TBAF) (1.70 mL of 1.0M solution in THF, 1.70 mmol, 2.93 equiv) was added dropwise to this solution. The reaction was then warmed to rt and stirred for 2 h. The reaction was evaporated to dryness, and the crude product was purified by silica gel chromatography (3:1 hexane/EtOAc) to give 118 mg of the desired product as a 1:1 mixture of two diastereomers (0.48 mmol, 83%).  $R_f = 0.2$  in 3:1 hexane/EtOAc.  $^1\text{H NMR}$  (600 MHz,  $\text{CDCl}_3$ ):  $\delta$  5.07 (tdd,  $J = 8.1, 4.1, 1.5$  Hz, 1H), 4.97-4.89 (m, 1H), 4.22-4.18 (m, 1H), 4.04-4.00 (m, 1H), 2.91- 2.78 (m, 3H), 2.77-2.68 (m, 3H), 2.67-2.56 (m, 3H), 2.34-2.22 (m, 2H), 2.08 (dd,  $J = 15.2, 5.6$  Hz, 1H), 2.05-1.92 (m, 4H), 1.92-1.67 (m, 6H), 1.17 (s, 18H).  $^{13}\text{C NMR}$  (150 MHz,  $\text{CDCl}_3$ ):  $\delta$  178.2, 177.5, 71.5, 70.5, 68.0, 68.1, 39.2, 39.0, 38.7, 38.6, 36.1, 36.0, 33.9, 33.1, 32.7, 32.6, 27.1, 27.0, 24.1, 23.4. HRMS (ESI): calcd for  $\text{C}_{12}\text{H}_{22}\text{O}_3\text{NaS}^+ [\text{M} + \text{Na}]^+$ , 269.1182; found, 269.1184.

### 5-oxothiocan-3-yl pivalate (17).

5-hydroxythiocan-3-yl pivalate **16** (75 mg, 0.31 mmol, 1.0 equiv) was dissolved in dichloromethane (1.8 mL). To this solution, Dess-Martin periodinane (195 mg, 0.460 mmol, 1.50 equiv) was added, and the reaction mixture was stirred vigorously. A small amount of water (6  $\mu$ L) was solvated in dichloromethane (6 mL) through pipetting, and the resulting wet dichloromethane was slowly added to the reaction mixture. The addition of the wet dichloromethane resulted in precipitation to form a cloudy mixture. After 30 min, the reaction was complete and dichloromethane was evaporated off. The reaction mixture was diluted in ether (10 mL), and the organics were washed with 1:1 sodium bicarbonate/10 % sodium thiosulfate aqueous solution (12 mL). The organic layer was washed with water (10 mL) and saturated sodium chloride solution (10 mL), dried with  $\text{MgSO}_4$ , decanted and evaporated to dryness. This procedure resulted in 55 mg of desired product (0.23 mmol, 74 %).  $R_f = 0.25$  in 3:1 hexane/EtOAc.  $^1\text{H NMR}$  (500 MHz,  $\text{CDCl}_3$ ):  $\delta$  5.19 (tt,  $J = 10.2, 3.9$  Hz, 1H), 2.93 (dd,  $J = 14.4, 3.7$  Hz, 1H), 2.95-2.76 (m, 2H), 2.60 (dd,  $J = 12.7, 3.7$  Hz, 1H), 2.45-2.53 (m, 3H), 2.41-2.36 (m, 1H), 2.22-2.12 (m, 2H), 1.14 (s, 9H).  $^{13}\text{C NMR}$  (150 MHz,  $\text{CDCl}_3$ )  $\delta$  208.7, 177.3, 72.4, 45.0, 42.9, 38.7, 34.7, 32.7, 27.0. HRMS (ESI): calcd for  $\text{C}_{12}\text{H}_{20}\text{O}_3\text{NaS}^+ [\text{M} + \text{Na}]^+$ , 267.1025; found, 267.1027.

### (E)-5-(((trifluoromethyl)sulfonyl)oxy)-3,6,7,8-tetrahydro-2H-thiocin-3-yl pivalate (18).

5-oxothiocan-3-yl pivalate **17** (20 mg, 0.082 mmol, 1.0 equiv) was dissolved in THF (2.8 mL, anhydrous), and the reaction was cooled to  $-78$   $^\circ\text{C}$ . To this solution, sodium bis(trimethylsilyl)amide (NaHMDS) (82  $\mu$ L of 2M in THF, 0.16 mmol, 2.0 equiv) was added. After stirring at  $-78$   $^\circ\text{C}$  for 30 min, *N*-phenyl-bis(trifluoromethanesulfonylimide) (33 mg, 0.092 mmol, 1.1 equiv) was added. After 20 additional minutes, the reaction was quenched with methanol (1 mL) and evaporated to dryness. The crude product was purified by silica gel chromatography (10:1 hexane/EtOAc) to give the desired product (20 mg, 0.053 mmol, 64 %).  $R_f = 0.7$  in 3:1 hexane/EtOAc.  $^1\text{H NMR}$  (600 MHz,  $\text{CDCl}_3$ ):  $\delta$  5.88 (t,  $J = 8.6$  Hz, 1H), 5.15-5.18 (m, 1H), 3.05-3.07 (m, 1H), 2.90-2.96 (m, 2H), 2.74 (dd,  $J = 15.2, 7.7$  Hz, 1H), 2.62-2.70 (m, 2H), 2.57-2.61 (m, 1H), 2.46-2.51 (m, 1H), 1.16 (s, 9H).  $^{13}\text{C NMR}$  (150 MHz,  $\text{CDCl}_3$ )  $\delta$  177.5, 149.4, 122.4, 118.4 (q,  $J = 318$  Hz), 73.5, 38.7, 34.0, 33.7, 32.2, 30.0, 26.9.  $^{19}\text{F NMR}$  (376 MHz,  $\text{CDCl}_3$ ):  $\delta$  -73.12 (s, 3F). HRMS (ESI): calcd for  $\text{C}_{13}\text{H}_{19}\text{O}_5\text{F}_3\text{NaS}_2^+ [\text{M} + \text{Na}]^+$ , 399.0518; found, 399.0519.

### 2,6,7,8-tetrahydro-4,5-didehydro-2H-thiocin-3-ol (thiaOCT, 8).

(E)-5-(((trifluoromethyl)sulfonyl)oxy)-3,6,7,8-tetrahydro-2H-thiocin-3-yl pivalate **18** (75 mg, 0.20 mmol, 1.0 equiv) was dissolved in THF (6.0 mL, anhydrous). The reaction mixture was cooled to  $0$   $^\circ\text{C}$  and lithium diisopropylamide (LDA) (0.2 M in THF, 2.1 mL, 0.42 mmol, 2.1 equiv) was added dropwise. The addition of LDA resulted in a color change from pale yellow to brown. After 10 min, the reaction was quenched with methanol (2 mL) and evaporated to dryness. The crude product was purified by silica gel chromatography (10:1 to 3:1 hexane/EtOAc) to yield the desired cyclooctyne **6** (15 mg, 0.11 mmol, 53 %).  $R_f = 0.3$  in 3:1 hexane/EtOAc.  $^1\text{H NMR}$  (400 MHz,  $\text{CDCl}_3$ ):  $\delta$  4.37-

4.34 (m, 1H), 3.34 (dd,  $J = 10.0, 4.8$  Hz, 1H), 3.28 (d,  $J = 7.0$  Hz, 1H), 3.14 (dt,  $J = 9.4, 2.8$  Hz, 1H), 2.92-2.88 (m, 1H), 2.76 (d,  $J = 10.0$  Hz, 1H), 2.52-2.49 (m, 1H), 2.43-2.38 (m, 3H).  $^{13}\text{C}$  NMR (150 MHz,  $\text{CDCl}_3$ )  $\delta$  91.2, 90.8, 71.5, 42.4, 41.1, 29.2, 23.5. HRMS (EI): calcd for  $\text{C}_7\text{H}_{10}\text{OS}^+ [\text{M}]^+$ , 142.0452; found, 142.0449;  $[\text{M}-\text{H}_2\text{O}]^+$ , 124;  $[\text{M}-\text{CHO}]^+$ , 113;  $[\text{M}-\text{C}_2\text{H}_3\text{O}]^+$ , 99;  $[\text{M}-\text{C}_5\text{H}_5\text{O}]^+$ , 61.

**Figure S1**

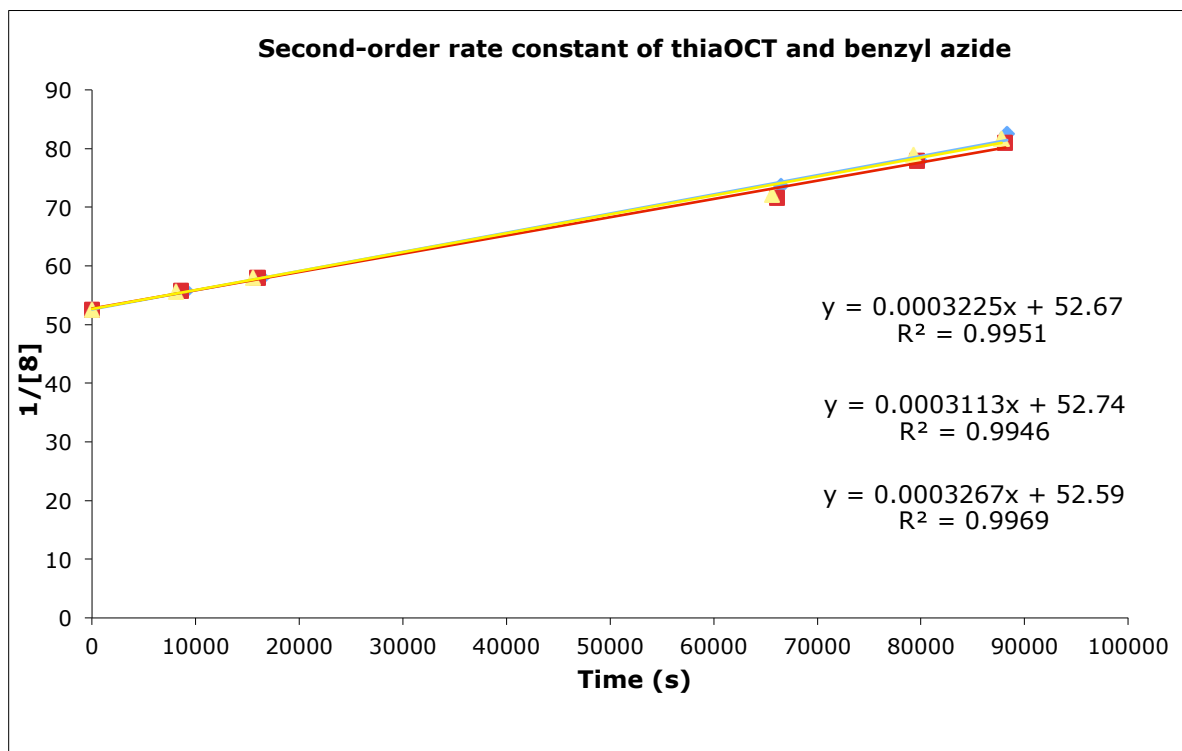

**Figure S1.**

The reaction of thiaOCT (**8**) and benzyl azide was monitored by  $^1\text{H}$  NMR for 1500 min at rt. ThiaOCT and benzyl azide were separately dissolved in  $\text{CD}_3\text{CN}$  and mixed together in a 1: 1 ratio at a concentration of 19 mM. The percent conversion was calculated by the disappearance of thiaOCT and benzyl azide relative to the formation of product as determined by integration. The second-order rate constant was determined by plotting  $1/[\mathbf{8}]$  versus time. The plot was fit to a linear regression and the slope corresponds to the second-order rate constant. Shown are data from three replicate experiments. The three lines had an average slope of  $0.00032 \pm 7.7 \times 10^{-6} \text{ M}^{-1}\text{s}^{-1}$ .

**Scheme S1.** Synthesis of thiaDIFBO

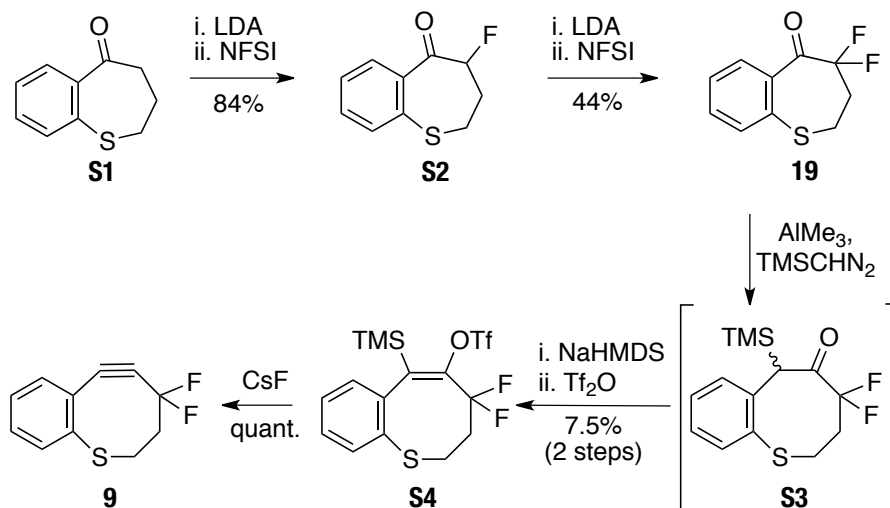

NFSI = *N*-fluorobenzenesulfonimide

**S1** was sequentially difluorinated using LDA and *N*-fluorobenzenesulfonimide (NFSI) to yield **19**. This intermediate was homologated using  $\text{AlMe}_3$  and  $\text{TMSCHN}_2$  to yield  $\alpha$ -silyl ketone **S3**. This step was far less efficient than achieved with the all-carbon cycloheptane analog, perhaps due to Lewis acid/base pairing of the sulfur atom and the trimethylaluminum. Due to the labile nature of the  $\alpha$ -silyl ketone, crude **S3** was immediately converted to vinyl triflate **S4**, which was then quantitatively converted to thiaDIFBO (**9**) by treatment with  $\text{CsF}$ .

**4-fluoro-3,4-dihydrobenzo[*b*]thiepin-5(2*H*)-one (S2).**

A flame-dried flask was charged with 3,4-dihydrobenzo[*b*]thiepin-5(2*H*)-one **S1** (1.2 g, 6.6 mmol, 1 equiv). The flask was evacuated and backfilled with nitrogen twice. THF (33 mL, anhydrous) was added to the flask and the solution cooled to  $-78^\circ\text{C}$ . LDA (4.0 mL of 2M solution in heptane/ THF/ ethylbenzene, 8.0 mmol, 1.2 equiv) was added and the solution warmed to  $0^\circ\text{C}$  and allowed to stir for 1 h. Separately, a dry flask was charged with *N*-fluorobenzenesulfonimide (NFSI) (2.7 g, 8.6 mmol, 1.3 equiv) and evacuated and backfilled with nitrogen twice. THF (30 mL, anhydrous) was added and the solution cooled to  $-78^\circ\text{C}$ . The solution of base was slowly added to the NFSI solution over 12 min via syringe and the mixture was allowed to warm to rt over 30 min, at which point it was quenched with saturated ammonium chloride (50 mL). The organic layer was separated and the aqueous layer extracted with ethyl acetate (2 x 100 mL). The organic layers were combined, dried with sodium sulfate, filtered, and concentrated under reduced pressure. The crude oil was purified using silica gel chromatography (93:7 hexanes/EtOAc) to yield 1.1 g (5.6 mmol, 85%) of the desired product as a yellow oil.  $R_f = 0.48$  in 9:1 hexane/EtOAc.  $^1\text{H NMR}$  (300 MHz,  $\text{CDCl}_3$ ):  $\delta$  8.02-7.98 (dd,  $J = 7.6, 1.5$  Hz, 1H), 7.47-7.44 (d,  $J = 7.8$  Hz, 1H), 7.41-7.7.36 (td,  $J = 7.5, 1.5$  Hz, 1H), 7.33-7.28 (t,  $J = 7.1$  Hz, 1H), 5.81-5.76 (dd,  $J = 7.2, 9$  Hz, 0.5 H), 5.65-5.60 (dd,  $J = 7.2, 9$  Hz, 0.5H),

3.24-3.16 (m, 1H), 2.89-2.70 (m, 2H), 2.52-2.37 (m, 1H). <sup>13</sup>C NMR (130 MHz, CDCl<sub>3</sub>): δ 197.5-197.4 (d, *J* = 16.6), 141.7, 134.9, 131.8, 131.1, 130.1, 126.2, 93.8-92.5 (d, *J* = 185), 36.4-36.3 (d, *J* = 24), 29.7 (d, *J* = 12). <sup>19</sup>F NMR (375 MHz, CDCl<sub>3</sub>): δ -189.4 (dt, *J*<sub>1</sub> = 4, 45 Hz, 1F). HRMS (EI): calc for C<sub>10</sub>H<sub>9</sub>FOS<sup>+</sup> [M]<sup>+</sup>, 196.0358; found, 196.0357; [M-CO]<sup>+</sup>, 168; [M-CH<sub>3</sub>S]<sup>+</sup>, 149.

#### **4,4-difluoro-3,4-dihydrobenzo[*b*]thiepin-5(2H)-one (19).**

A flame-dried flask was charged with 4-fluoro-3,4-dihydrobenzo[*b*]thiepin-5(2H)-one **S2** (800 mg, 4.1 mmol, 1 equiv). The flask was evacuated and backfilled with nitrogen twice. THF (20 mL, anhydrous) was added to the flask and the solution cooled to -78 °C. LDA (2.5 mL of 2 M solution in heptane/ THF/ ethylbenzene, 4.9 mmol, 1.2 equiv) was added and the solution warmed to 0 °C and allowed to stir for 1 h. Separately, a dry flask was charged with NFSI (1.7 g, 5.3 mmol, 1.3 equiv) and evacuated and backfilled with nitrogen twice. THF (20 mL, anhydrous) was added and the solution cooled to -78 °C. The solution of base was slowly added to the NFSI solution over 10 min via syringe and the reaction then allowed to warm to rt. Saturated ammonium chloride (40 mL) was added to the reaction followed by ethyl acetate (50 mL). The organic layer was separated and the aqueous layer extracted with ethyl acetate (2 x 50 mL). The organic layers were combined, dried over sodium sulfate, filtered, and concentrated under reduced pressure. The crude oil was purified using silica gel chromatography (93:7 hexanes/EtOAc) to yield 390 mg (1.8 mmol, 45%) of a light yellow oil that solidified upon cooling. R<sub>f</sub> = 0.55 in 9:1 hexane/EtOAc. <sup>1</sup>H NMR (500 MHz, CDCl<sub>3</sub>): δ 7.65-7.63 (d, *J* = 7.8, 1H), 7.39-7.30 (m, 2H), 7.26-7.24 (t, *J* = 8 Hz, 1H), 3.05-3.03 (t, *J* = 6 Hz, 2H), 2.76-2.68 (m, 2H). <sup>13</sup>C NMR (150 MHz, CDCl<sub>3</sub>): δ 193, 138.5, 135, 132, 131.2, 130, 126.4, 118.6 (t, *J* = 243), 39.6 (t, *J* = 25), 28. <sup>19</sup>F NMR (375 MHz, CDCl<sub>3</sub>): δ -99 (t, *J* = 19 Hz, 1F). HRMS (EI): calc for C<sub>10</sub>H<sub>8</sub>F<sub>2</sub>OS<sup>+</sup> [M]<sup>+</sup>, 214.0264; found, 214.0270; [M-CO]<sup>+</sup>, 186; [M-CH<sub>2</sub>S]<sup>+</sup>, 168.

#### **(*Z*)-4,4-difluoro-6-(trimethylsilyl)-3,4-dihydro-2H-benzo[*b*]thiocin-5-yl trifluoromethanesulfonate (S4).**

A flame-dried flask was charged with 4,4-difluoro-3,4-dihydrobenzo[*b*]thiepin-5(2H)-one **19** (214 mg, 1 mmol, 1 equiv) and evacuated and backfilled with nitrogen twice. Dry dichloromethane (12.5 mL) was added and the solution was cooled to 0 °C.

Trimethylsilyl diazomethane (TMSCHN<sub>2</sub>) (600 μL of 2M solution in dichloromethane, 1.2 mmol, 1.2 equiv) was added via syringe immediately followed by trimethylaluminum (AlMe<sub>3</sub>) (600 μL of 2M solution in toluene, 1.2 mmol, 1.2 equiv). The reaction was stirred at 0 °C for 10 min, at which point the reaction was quenched with saturated ammonium chloride (5 mL) followed by saturated Rochelle's salt (5 mL). Three times, dichloromethane (3 x 25 mL) was added and the organic layer was separated. The organic layers were combined, dried over sodium sulfate, filtered, and concentrated to an oil that still contained 4,4-difluoro-6-(trimethylsilyl)-3,4-dihydro-2H-benzo[*b*]thiocin-5(6H)-one (**S3**) and toluene was obtained.

The oil was transferred to a dry flask that was evacuated and backfilled with nitrogen twice. Dry THF (10 mL) was added and the reaction cooled to  $-78\text{ }^{\circ}\text{C}$ . NaHMDS (600  $\mu\text{L}$  of 2M solution in THF, 1.2 mmol, 1.2 equiv) was added and the reaction stirred for 2 h at  $-78\text{ }^{\circ}\text{C}$ . Trifluoromethane sulfonic anhydride (200  $\mu\text{L}$ , 1.2 mmol, 1.2 equiv) was then added and the reaction stirred for 1 h at  $-78\text{ }^{\circ}\text{C}$ . Methanol (1 mL) was added and the reaction was then allowed to warm to rt and concentrated. The oily solid was taken up in dichloromethane and filtered. The filtrate was concentrated and purified via HPLC on a 100  $\text{\AA}$   $\text{C}_{18}$  column, (70% to 100% acetonitrile in water over 30 minutes). The desired product eluted at 17 minutes. Concentration of the desired fraction yielded 16 mg (0.037 mmol, 3.8%) of (*Z*)-4,4-difluoro-6-(trimethylsilyl)-3,4-dihydro-2*H*-benzo[*b*]thiocin-5-yl trifluoromethanesulfonate **S4** as a clear oil.  $R_f = 0.82$  in 9:1 hexane/EtOAc.  $^1\text{H}$  NMR (500 MHz,  $\text{CDCl}_3$ ):  $\delta$  7.67-7.65 (d,  $J = 8$ , 1H), 7.40-7.37 (t,  $J = 7.5$ , 1H), 7.29-7.26 (m, 1H), 7.16-7.14 (d,  $J = 7.5$  Hz, 1H), 3.00-2.96 (m, 1H), 2.83-2.76 (m, 1H), 2.35-2.23 (m, 1H), 2.12-2.05 (m, 1H), 0.019 (s, 9H).  $^{13}\text{C}$  NMR (125 MHz,  $\text{CDCl}_3$ ):  $\delta$  144.1 (t,  $J = 30$ ), 143 (d,  $J = 24$ ), 136.6, 130.3, 129.3, 128.2, 126.5, 122.6, 120, 119.9, 117.5, 116, 34.2 (t,  $J = 26.3$  Hz), 29.8 (t,  $J = 5$  Hz), -1.3.  $^{19}\text{F}$  NMR (375 MHz,  $\text{CDCl}_3$ ):  $\delta$  -70 (t,  $J = 19$  Hz, 3F), -90 (dp,  $J_1 = 262$ , 22.5 Hz, 1H), -92 (bd,  $J = 274$  Hz, 1H). HRMS (EI): calc for  $\text{C}_{15}\text{H}_{17}\text{F}_5\text{O}_3\text{S}_2\text{Si}^+ [\text{M}]^+$ , 432.0309; found, 432.0316,  $[\text{M}-\text{C O}_3\text{F}_3\text{S}]^+$ , 283;  $[\text{M}-\text{C}_7\text{H}_4\text{O}_3\text{F}_3\text{S}]^+$ , 207.

#### 4,4-difluoro-3,4-dihydro-5,6-didehydro-2*H*-benzo[*b*]thiocine (ThiaDIFBO, **9**).

(*Z*)-4,4-difluoro-6-(trimethylsilyl)-3,4-dihydro-2*H*-benzo[*b*]thiocin-5-yl trifluoromethanesulfonate **S4** (16 mg, 0.037 mmol, 1 equiv) was dissolved in deuterated acetonitrile (1 mL) and cesium fluoride (34 mg, 0.22 mmol, 6 equiv) was added. The reaction was stirred for 1 h at rt. It was then filtered, and the filtrate concentrated and purified by silica gel chromatography (99:1 hexanes/ EtOAc) to yield 7.7 mg (0.036 mmol, 99%) of the desired product as a clear oil.  $R_f = 0.86$  in 9:1 hexane/EtOAc.  $^1\text{H}$  NMR (600 MHz,  $\text{CD}_3\text{CN}$ ):  $\delta$  7.56-7.54 (d,  $J = 9$  Hz, 1H), 7.47-7.45 (d,  $J = 8$  Hz, 1H), 7.42-7.39 (t,  $J = 7.2$  Hz, 1H), 7.35-7.33 (t,  $J = 7.5$  Hz, 1H), 3.17-3.16 (m, 2H), 2.86- 2.79 (m, 2H).  $^{13}\text{C}$  NMR (125 MHz,  $\text{CD}_3\text{CN}$ ):  $\delta$  148, 131.4, 130.9, 128.8, 127.4, 122.4, 120.6, 119.9, 106.3 (t,  $J = 9$  Hz), 46.1 (t,  $J = 27.5$  Hz), 28.8 (t,  $J = 3.8$  Hz).  $^{19}\text{F}$  NMR (375 MHz,  $\text{CD}_3\text{CN}$ ): -86 (bt, 2F). HRMS (EI): calc for  $\text{C}_{11}\text{H}_8\text{F}_2^+ [\text{M}]^+$ , 210.0315; found, 210.0321,  $[\text{M}-\text{C}_2\text{H}_3]^+$ , 183;  $[\text{M}-\text{CF}_2]^+$ , 160.

Figure S2

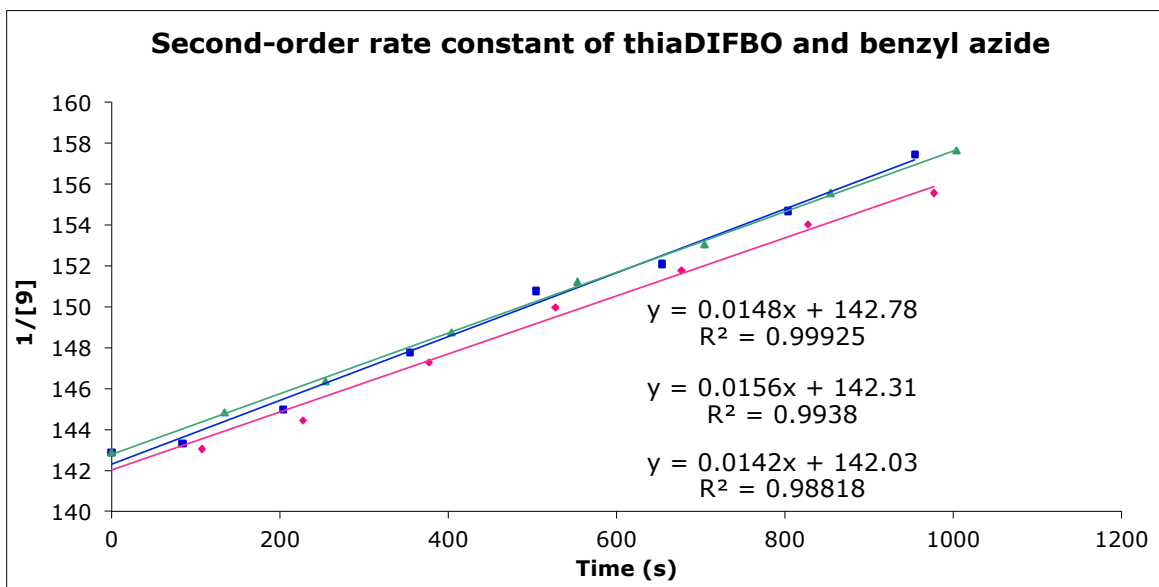

Figure S2.

The reaction of thiaDIFBO **9** and benzyl azide was monitored by  $^1\text{H}$  NMR for 20 min at rt. ThiaDIFBO and benzyl azide were separately dissolved in  $\text{CD}_3\text{CN}$  and mixed together in a 1: 1 ratio at a concentration of 7 mM. The percent conversion was calculated by the disappearance of thiaDIFBO and benzyl azide relative to the formation of product as determined by integration. The triazole isomers were formed in approximately a 3:1 ratio and could be separated by HPLC (1.86:1  $\text{H}_2\text{O}/\text{MeCN}$  to 1:3  $\text{H}_2\text{O}/\text{MeCN}$ , 34.5 min,  $\text{C}_{18}$  column). The second-order rate constant was determined by plotting  $1/[\mathbf{9}]$  versus time. The plot was fit to a linear regression and the slope corresponds to the second-order rate constant. Shown are data from three replicate experiments. The three lines had an average slope of  $0.015 \pm 0.001 \text{ M}^{-1}\text{s}^{-1}$ .

Scheme S2. Synthesis of TMTH

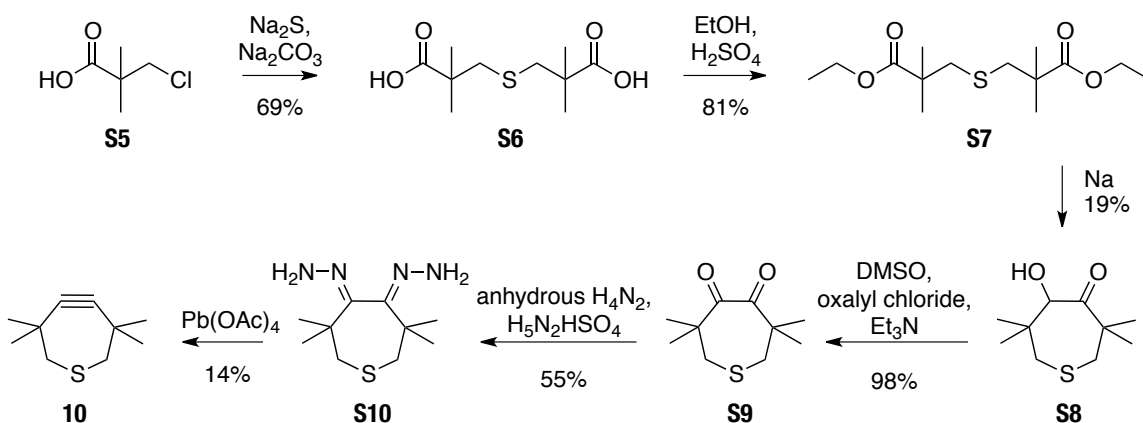

### **3,3'-thiobis(2,2-dimethylpropanoic acid) (S6).**

Sodium carbonate (4.0 g, 37 mmol, 0.5 equiv) was dissolved in water (13 mL) and the solution was poured into a vessel containing chloropivalic acid **S5** (10 g, 74 mmol, 1 equiv). Once bubbling subsided, sodium sulfide nonahydrate (17.8 g, 185 mmol, 2.5 equiv) dissolved in water (25 mL) was added. The reaction was stirred for 72 h at rt. The pH was adjusted to 1 by addition of 50% sulfuric acid. The suspension was filtered and the solid dissolved in hot ethanol and filtered. The filtrate was concentrated and recrystallized out of hot water with about 10% ethanol. The solid was dried under high vacuum to yield 6.0 g (26 g, 69%) of a white powder. <sup>1</sup>H NMR (400 MHz, CDCl<sub>3</sub>): δ 2.81 (s, 4H), 1.27 (s, 12H). HRMS (ESI): calc for C<sub>10</sub>H<sub>17</sub>O<sub>4</sub>S<sup>-</sup> [M-H]<sup>-</sup>, 233.0853; found, 233.0855. In agreement with reported spectral data.<sup>[31]</sup>

### **diethyl 3,3'-thiobis(2,2-dimethylpropanoate) (S7).**

3,3'-thiobis(2,2-dimethylpropanoic acid) **S6** (4.0 g, 17 mmol, 1 equiv) was dissolved in ethanol (45 mL, 770 mmol, 45 equiv) and toluene (45 mL). Concentrated sulfuric acid (300 μL) was added and the flask was equipped with a Dean-Stark apparatus and heated at 90 °C overnight. The next day the reaction was cooled to rt and poured into a separatory funnel containing water (100 mL). The organic layer was separated and washed with saturated sodium bicarbonate (1 x 100 mL). The aqueous layers were combined and back extracted with ethyl acetate (1 x 300 mL). The organic layers were combined, dried over sodium sulfate, filtered, and concentrated. The crude oil was purified via silica gel chromatography (7:1 hexanes/EtOAc) to yield 4.0 g (13 mmol, 81%) of a clear oil. R<sub>f</sub> = 0.65 in 9:1 hexane/EtOAc. <sup>1</sup>H NMR (500 MHz, CDCl<sub>3</sub>): δ 4.16-4.10 (q, *J* = 7 Hz, 4H), 2.78 (s, 4H), 1.27-1.24 (t, *J* = 7 Hz, 6H), 1.23 (s, 12H). <sup>13</sup>C NMR (125 MHz, CDCl<sub>3</sub>): δ 177, 61.1, 45.6, 44.6, 25.1, 14.6. FTMS (ESI): calc for C<sub>14</sub>H<sub>26</sub>O<sub>4</sub>NaS<sup>+</sup> [M+Na]<sup>+</sup>, 313.1444; found, 313.1442. In agreement with reported spectral data.<sup>[31]</sup>

### **5-hydroxy-3,3,6,6-tetramethylthiepan-4-one (S8).**

In a flame-dried flask, sodium metal (390 mg, 17.2 mmol, 10 equiv) was added portionwise to boiling *m*-xylene (3.5 mL, anhydrous) while stirring vigorously. The reaction was then capped and positive nitrogen pressure was applied. Diethyl 3,3'-thiobis(2,2-dimethylpropanoate) **S7** (500 mg, 1.72 mmol, 1 equiv) in *m*-xylene (3.5 mL, anhydrous) was added via syringe over 2 h and the reaction was allowed to reflux for 0.5 h after addition. The reaction was then cooled to rt, filtered through celite and washed five times with toluene. The celite layer was carefully quenched with isopropanol (10 mL) and ethanol (2 mL). The filtrate was concentrated and filtered through a silica plug (8:1 EtOAc/MeOH). The combined eluent was concentrated. The resulting oil was then purified via silica gel chromatography (9:1 to 3:1 hexanes/EtOAc) to yield 65 mg (0.32 mmol, 19%) of light yellow crystals. R<sub>f</sub> = 0.59 in 3:1 hexane/EtOAc. <sup>1</sup>H NMR (600 MHz,



CDCl<sub>3</sub>):  $\delta$  4.17-4.16 (d,  $J$  = 6.6 Hz, 1H), 3.43-3.41 (d,  $J$  = 7.8 Hz, 1H), 2.73-2.71 (d,  $J$  = 12 Hz, 1H) 2.65- 2.58 (m, 2H), 2.44-2.41 (d,  $J$  = 14.4, 1H), 1.27 (s, 3H), 1.00 (s, 3H), 0.98 (s, 3H), 0.74 (s, 3H). <sup>13</sup>C NMR (150 MHz, CDCl<sub>3</sub>):  $\delta$  211.4, 47.2, 44.4, 23.6. HRMS (EI): calc for C<sub>10</sub>H<sub>18</sub>O<sub>2</sub>S<sup>+</sup> [M]<sup>+</sup>, 202.1028; found, 202.1030. In agreement with reported spectral data.<sup>[3]</sup>

### **3,3,6,6-tetramethylthiepane-4,5-dione (S9).**

A flame-dried flask was charged with oxalyl chloride (78  $\mu$ L, 0.89 mmol, 2.5 equiv) and dichloromethane (1.8 mL, anhydrous). The solution was cooled to  $-78$  °C.

Dimethylsulfoxide (110  $\mu$ L, 1.60 mmol, 4.5 equiv, anhydrous) was added and the reaction stirred for 15 min at  $-78$  °C. 5-hydroxy-3,3,6,6-tetramethylthiepan-4-one **S8** (72 mg, 0.36 mmol, 1 equiv) in dichloromethane (1.8 mL, anhydrous) was added and the reaction was stirred for another 15 min at  $-78$  °C. Triethylamine (220  $\mu$ L, 1.6 mmol, 4.5 equiv.) was added and the reaction stirred for 15 min at  $-78$  °C and warmed to 0 °C for 25 min. Water (1 mL) was added and the organic layer separated. The aqueous layer was washed with dichloromethane (2 x 10 mL) and the organic layers were combined, dried over sodium sulfate, filtered, and concentrated under reduced pressure. The oil was purified on silica gel chromatography (95:5 hexanes/EtOAc) to yield 70 mg (0.35 mmol, 98%) of a light yellow oil.  $R_f$  = 0.58 in 9:1 hexane/EtOAc. <sup>1</sup>H NMR (400 MHz, CDCl<sub>3</sub>):  $\delta$  2.58 (s, 4H), 1.27 (s, 12H). <sup>13</sup>C NMR (100 MHz, CDCl<sub>3</sub>):  $\delta$  216.7, 72, 50.4, 47.4, 42.6, 42.4, 27.7, 27.3, 23.5, 19.2. HRMS (EI): calc for C<sub>10</sub>H<sub>16</sub>O<sub>2</sub>S<sup>+</sup> [M]<sup>+</sup>, 200.0871; found, 200.0876, [M-CO]<sup>+</sup>, 172, [M-C<sub>2</sub>O<sub>2</sub>]<sup>+</sup>, 144, [M-C<sub>5</sub>H<sub>7</sub>O]<sup>+</sup>, 117. In agreement with reported spectral data.<sup>[4]</sup>

### **(1Z,1'E)-(3,3,6,6-tetramethylthiepane-4,5-diyldene)bis(hydrazine) (S10).**

3,3,6,6-tetramethylthiepane-4,5-dione **S9** (150 mg, 0.75 mmol, 1 equiv) was combined with hydrazine sulfate (390 mg, 3.0 mmol, 4 equiv), anhydrous hydrazine (20 drops), and ethanol (15 drops) in ethylene glycol (1.5 mL) and stirred overnight at 150 °C in a sealed vial. The following day, the reaction was cooled to rt, quenched with water (1 mL), and extracted three times with diethyl ether (3 x 2 mL). The organic layers were combined and concentrated to a white solid that was recrystallized out of hexanes to yield 100 mg (0.44 mmol, 59 %) of white crystals.  $R_f$  = 0.46 in 1:1 hexane/EtOAc. <sup>1</sup>H NMR (400 MHz, CDCl<sub>3</sub>):  $\delta$  5.24 (s, 4H), 2.55-2.45 (q,  $J$  = 14.4 Hz, 4H), 1.33 (s, 6H), 1.20 (s, 6H). <sup>13</sup>C NMR (150 MHz, CDCl<sub>3</sub>):  $\delta$  151.7, 45.3, 42, 44.6, 27.9, 26.8. FTMS (ESI): calc for C<sub>14</sub>H<sub>21</sub>N<sub>4</sub>S<sup>+</sup> [M + H]<sup>+</sup>, 229.1481; found, 229.1481. In agreement with reported spectral data.<sup>[4]</sup>

### **3, 3, 6, 6- tetramethylthiacycloheptyne (10).**

A dry flask was charged with (1Z,1'E)-(3,3,6,6-tetramethylthiepane-4,5-diyldene)bis(hydrazine) **S10** (100 mg, 0.44 mmol, 1 equiv) and then evacuated and backfilled with nitrogen twice. Dichloromethane (1 mL, anhydrous) was then added, and the solution was cooled to 0 °C. Lead tetraacetate (418 mg, 0.940 mmol, 2.15 equiv) was dissolved in dichloromethane (2.14 mL, anhydrous) and added dropwise over 1.5 h at 0

°C. The reaction was quenched with aqueous sodium bicarbonate (1 mL) and extracted with dichloromethane (3 x 3 mL). The organic layers were combined, dried over sodium sulfate, filtered, and concentrated under reduced pressure. The crude product was used for kinetics experiments. Purification for analytical purposes was performed by fractional distillation using a Kugelrohr apparatus. 10 mg (0.059 mmol, 14 %) of the desired product were collected at 50 °C, 8 mmHg as a light yellow oil.  $R_f = 0.75$  in 19:1 hexane/diethyl ether.  $^1\text{H NMR}$  (600 MHz,  $\text{CDCl}_3$ ):  $\delta$  2.80 (s, 4H), 1.22 (s, 12H).  $^{13}\text{C NMR}$  (150 MHz,  $\text{CDCl}_3$ ):  $\delta$  108.6, 52.7, 35, 26.2. HRMS (EI): calc for  $\text{C}_{10}\text{H}_{16}\text{S}^+ [\text{M}]^+$ , 168.0973; found, 168.0973,  $[\text{M}-\text{CH}_3]^+$ , 153,  $[\text{M}-\text{C}_3\text{H}_7]^+$ , 125,  $[\text{M}-\text{C}_2\text{H}_5\text{S}]^+$ , 107. In agreement with reported spectral data.<sup>[4]</sup>

**Figure S3**

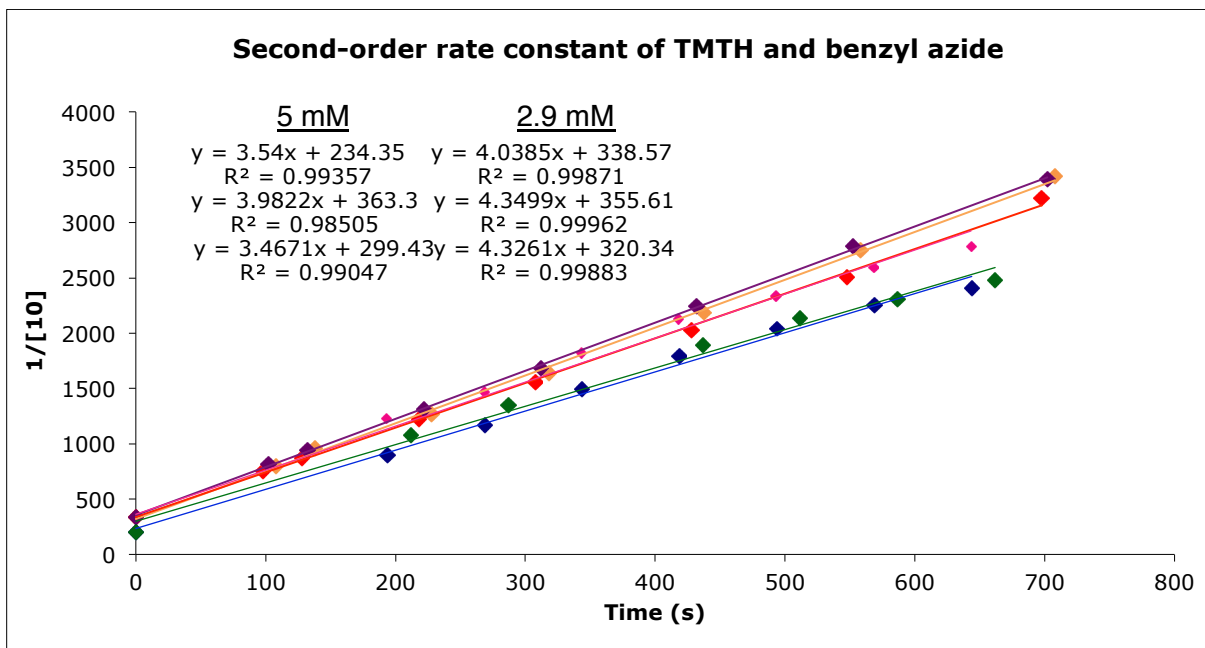

**Figure S3.**

The reaction of TMTH **10** and benzyl azide was monitored by  $^1\text{H NMR}$  for 12 min at rt. TMTH and benzyl azide were separately dissolved in  $\text{CD}_3\text{CN}$  and mixed together in a 1:1 ratio at concentration of 5 mM (blue, green, pink) or 2.9 mM (purple, orange, red). The percent conversion was calculated by the disappearance of TMTH and benzyl azide relative to the formation of product as determined by integration. The second-order rate constant was determined by plotting  $1/[\mathbf{10}]$  versus time. The plot was fit to a linear regression and the slope corresponds to the second-order rate constant. Shown are data from three replicate experiments at each concentration. The six lines had an average slope of  $4.0 \pm 0.4 \text{ M}^{-1}\text{s}^{-1}$ .

**Figure S4**

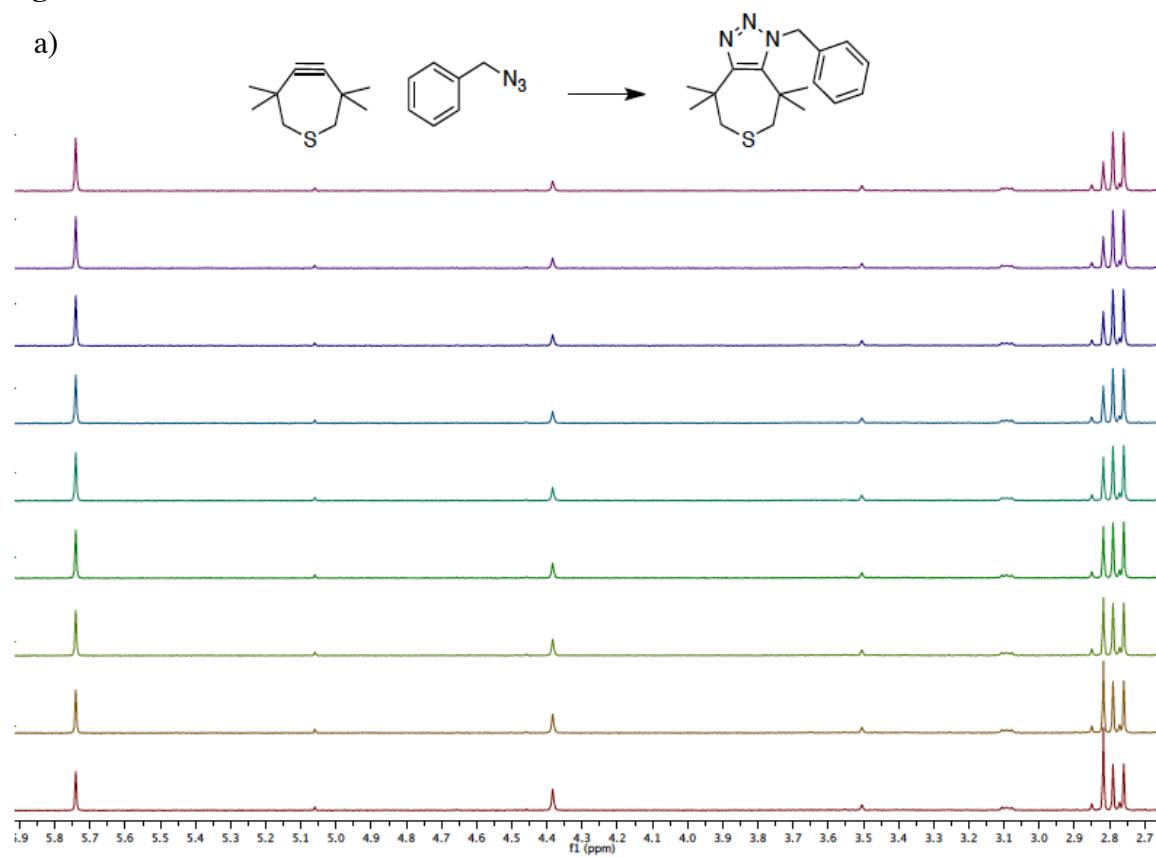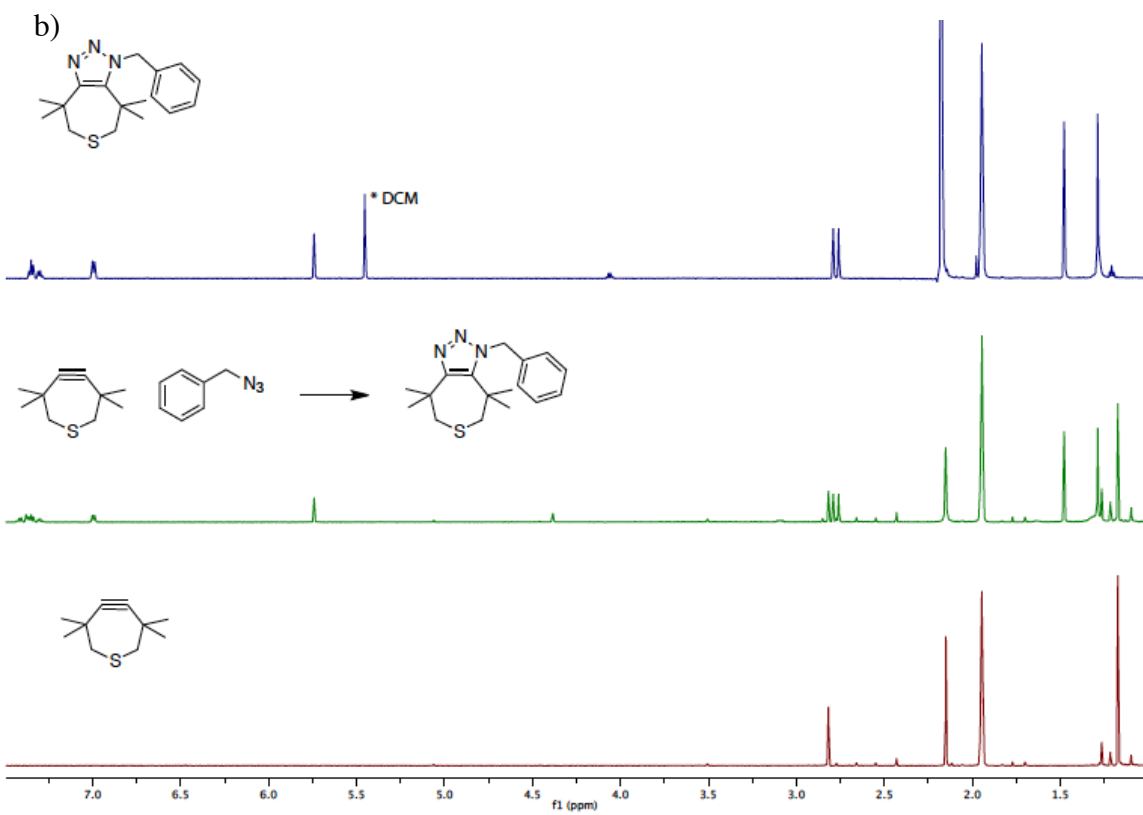

**Figure S4.**

a) 30 s interval timepoints of NMR kinetics measurements of the reaction between 2.9 mM azide and 2.9 mM **10** in CD<sub>3</sub>CN starting at 1.63 min through 5.63 min. (Measurements were taken until 15 min from mixing of starting materials.) The singlet at 5.75 ppm corresponds to the triazole benzylic protons, the singlet at 4.39 ppm corresponds to the azide benzylic protons, the singlet at 2.81 ppm corresponds to the methylene protons on TMTH, and the doublet at 2.78 ppm corresponds to the methylene protons on the product. b) Direct comparisons of **10** (bottom), the reaction in progress at 2.63 min (middle) and a purified sample of triazole product (top). Peak at 1.9 ppm is CD<sub>3</sub>CN and at 2.15 ppm is H<sub>2</sub>O. At 16.13 min, the NMR spectrum shows 84% conversion to product. To obtain pure triazole sample, the kinetics samples were combined after each had been allowed to react for ~16 min. After concentration, the crude mixture was purified by silica gel chromatography (hexanes to 3:1 hexanes/EtOAc) resulting in pure triazole product in 38% isolated yield.

**Scheme S3. Synthesis of 11**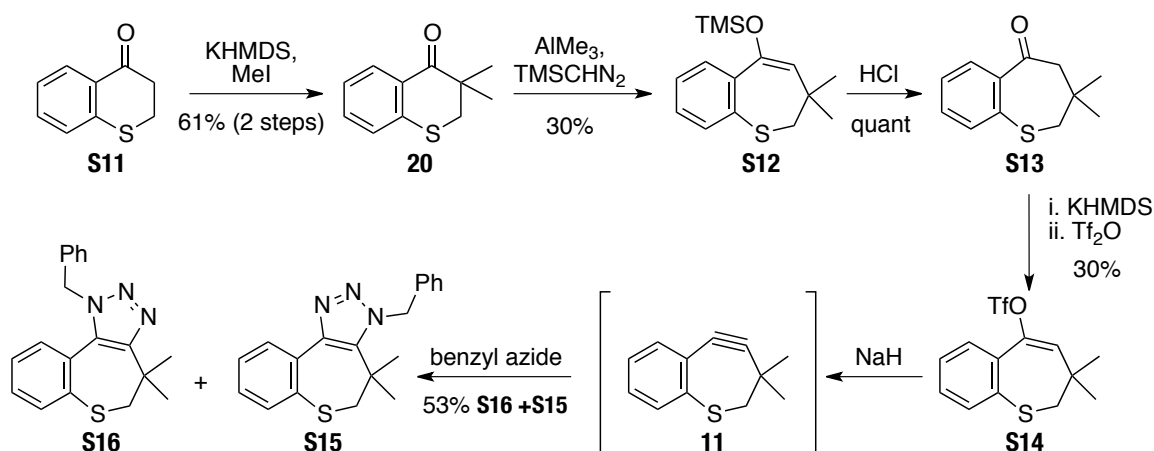

As with DIFBO and thiaDIFBO, the synthesis of **11** proceeded through a key ring expansion step (Scheme 3). Compound **S11** was dimethylated by treatment with KHMDS and methyl iodide to produce **20**. Homologation of **20** was performed using AlMe<sub>3</sub> and TMSCHN<sub>2</sub>, producing the unexpected silyl enol ether **S12**, which was readily converted to ketone **S13** upon treatment with acid. Compound **S13** was then treated with KHMDS and trifluoromethane sulfonic anhydride to form vinyl triflate **S14**. Attempts to eliminate the triflate using LDA or hexamethyldisilylamide bases gave no reaction, perhaps due to unfavorable steric interactions between these large bases and the *gem*-dimethyl group. However, treatment of **S14** with NaH in the presence of benzyl azide gave triazole cycloadducts **S15** and **S16**, suggesting that **11** was formed *in situ*.

### **3-methylthiochroman-4-one.**

THF (5.5 mL, anhydrous) and LiHMDS (3.61 mL of 1 M solution in THF, 3.61 mmol, 1.2 equiv) were combined and cooled to -78 °C. Thiochromanone **S11** (502 mg, 3.05 mmol, 1.0 equiv) was dissolved in THF (2.0 mL, anhydrous) and added to the solution of base over 1 h at -78 °C. After stirring for an additional hour at -78 °C, MeI (0.93 mL, 15 mmol, 4.9 equiv) was added and the mixture was warmed to rt over 3 h at which point, the reaction was quenched with MeOH (2 mL) and evaporated to dryness. Silica gel chromatography (35:1 hexanes/ EtOAc) resulted in pure desired compound (400 mg, 2.24 mmol, 73%).  $R_f = 0.45$  in 6:1 hexane/ethyl acetate.  $^1\text{H NMR}$  (600 MHz,  $\text{CDCl}_3$ ):  $\delta$  8.05 (dd,  $J = 7.2, 1.0$ , 1H), 7.33-7.30 (m, 1H), 7.19 (dd,  $J = 7.9, 0.7$  Hz, 1H), 7.13-7.10 (m, 1H), 3.09 (s, 1H), 3.08 (d,  $J = 3.1$  Hz, 1H), 2.88 (dp,  $J = 8.7, 6.8$  Hz, 1H), 1.30 (d,  $J = 6.8$  Hz, 3H).  $^{13}\text{C NMR}$  (150 MHz,  $\text{CDCl}_3$ ):  $\delta$  196.5, 141.9, 133.0, 130.5, 129.6, 127.4, 124.9, 42.2, 33.1, 15.1. HRMS (EI): Calcd. for  $\text{C}_{10}\text{H}_{10}\text{OS}^+ [\text{M}]^+$  178.0452, found 178.0452;  $[\text{M}-\text{C}_2\text{H}_2\text{O}]^+$ , 136;  $[\text{M}-\text{C}_4\text{H}_6\text{O}]^+$ , 108.

### **3,3-dimethylthiochroman-4-one (20).**

THF (1.0 mL, anhydrous) and LiHMDS (0.96 mL of 1 M solution in THF, 0.96 mmol, 1.2 equiv) were combined and cooled to -78 °C. 3-methylthiochroman-4-one (144 mg, 0.809 mmol, 1.0 equiv) was dissolved in THF (1.0 mL, anhydrous) and added to the solution of base over 1 h at -78 °C. After stirring for an additional hour at -78 °C, MeI (0.25 mL, 4.0 mmol, 4.9 equiv) was added and the mixture was warmed to rt over 3 h, at which point the reaction was quenched with MeOH (1 mL) and evaporated to dryness. Silica gel chromatography (40:1 hexanes/ EtOAc) resulted in pure **20** (129 mg, 0.672 mmol, 83%).  $R_f = 0.55$  in 6:1 hexane/ethyl acetate.  $^1\text{H NMR}$  (500 MHz,  $\text{CDCl}_3$ ):  $\delta$  8.08 (dd,  $J = 8.0, 1.2$  Hz, 1H), 7.33 (ddd,  $J = 8.0, 7.2, 1.5$  Hz, 1H), 7.20 (dd,  $J = 8.0, 0.8$  Hz, 1H), 7.14 (ddd,  $J = 8.2, 7.2, 1.2$  Hz, 1H), 3.07 (s, 2H), 1.32 (s, 6H).  $^{13}\text{C NMR}$  (125 MHz,  $\text{CDCl}_3$ ):  $\delta$  198.5, 141.6, 132.9, 130.3, 129.7, 127.3, 124.9, 41.1, 39.3, 23.7. HRMS (EI): Calcd. for  $\text{C}_{11}\text{H}_{12}\text{OS}^+ [\text{M}]^+$  192.0609, found 192.0604;  $[\text{M}-\text{C}_3\text{H}_4\text{O}]^+$ , 136;  $[\text{M}-\text{C}_5\text{H}_8\text{O}]^+$ , 108.

### **(3,3-dimethyl-2,3-dihydrobenzo[*b*]thiepin-5-yloxy)trimethylsilane (S12).**

3,3-dimethylthiochroman-4-one **20** (365 mg, 1.90 mmol, 1.0 equiv) was dissolved in  $\text{CH}_2\text{Cl}_2$  (10 mL, anhydrous) and cooled to -78 °C.  $\text{AlMe}_3$  (1.14 mL of 2M solution in toluene, 2.28 mmol, 1.2 equiv) was added and the solution was stirred for 15 min at which point,  $\text{TMSCHN}_2$  (1.14 mL of 2M solution in  $\text{CH}_2\text{Cl}_2$ , 2.28 mmol, 1.2 equiv) was added. The solution was warmed to rt overnight. The mixture was quenched with aqueous Rochelle's salt (5 mL) and stirred until two layers formed. The quenched solution was extracted with dichloromethane (3 x 10 mL). The organic layers were combined, dried with  $\text{MgSO}_4$ , decanted, and evaporated to dryness. Silica gel chromatography (150:1 hexanes/ EtOAc) resulted in pure **S12** (160 mg, 0.576 mmol, 30%).  $R_f = 0.85$  in 6:1 hexane/ethyl acetate.  $^1\text{H NMR}$  (600 MHz,  $\text{CDCl}_3$ ):  $\delta$  7.38 (d,  $J =$

7.6 Hz, 1H), 7.14-7.11 (m, 2H), 7.00 (t,  $J = 7.1$  Hz, 1H), 5.81 (s, 1H), 2.77 (s, 2H), 1.28 (s, 6H), 0.30 (s, 9H).  $^{13}\text{C}$  NMR (125 MHz,  $\text{CDCl}_3$ ):  $\delta$  162.3, 137.4, 137.1, 131.5, 131.0, 126.6, 124.8, 110.1, 46.1, 44.2, 28.0, 0.8. HRMS (EI): Calcd. for  $\text{C}_{15}\text{H}_{22}\text{OSSi}^+$   $[\text{M}]^+$  278.1161, found 278.1163;  $[\text{M}-\text{C}_4\text{H}_8]^+$ , 222;  $[\text{M}-\text{C}_6\text{H}_{12}\text{Si}]^+$ , 165;  $[\text{M}-\text{C}_7\text{H}_{14}\text{OSi}]^+$ , 136;  $[\text{M}-\text{C}_9\text{H}_{18}\text{OSi}]^+$ , 108.

### **3,3-dimethyl-3,4-dihydrobenzo[*b*]thiepin-5(2*H*)-one (S13).**

Silyl enol ether **S12** (90 mg, 0.32 mmol, 1 equiv) was dissolved in MeOH and 12M HCl (1 drop) was added. The mixture was stirred for 30 min at rt and then quenched with saturated sodium bicarbonate (until bubbling ceased). The MeOH was removed by rotary evaporation and the resulting aqueous solution was extracted with dichloromethane (3 x 10 mL). The organic layers were combined, dried with  $\text{MgSO}_4$ , decanted, and evaporated to dryness. This procedure resulted in pure ketone **S13** (65 mg, 0.31 mol, 97% yield).  $R_f = 0.5$  in 4:1 hexane/ethyl acetate.  $^1\text{H}$  NMR (400 MHz,  $\text{CDCl}_3$ ):  $\delta$  7.46 (dd,  $J = 7.5, 1.1$  Hz, 1H), 7.29 (d,  $J = 7.3$  Hz, 1H), 7.20 (td,  $J = 7.5, 1.4$  Hz, 1H), 7.14 (td,  $J = 7.5, 1.4$  Hz, 1H), 4.03 (s, 2H), 2.83 (s, 2H), 1.32 (s, 6H).  $^{13}\text{C}$  NMR (150 MHz,  $\text{CDCl}_3$ ):  $\delta$  209.3, 138.2, 136.8, 132.7, 130.6, 128.6, 127.5, 49.3, 47.2, 46.2, 24.3. HRMS (EI): Calcd. for  $\text{C}_{12}\text{H}_{14}\text{OS}^+$   $[\text{M}]^+$  206.0765, found 206.0764

### **3,3-dimethyl-2,3-dihydrobenzo[*b*]thiepin-5-yl trifluoromethanesulfonate (S14).**

Ketone **S13** (62 mg, 0.30 mol, 1 equiv.) was dissolved in THF (4.5 mL, anhydrous) and cooled to  $-78$  °C. KHMDS (0.72 mL of 0.5 M solution in toluene, 0.36 mmol, 1.2 equiv) was added and the solution was stirred for 2 h at  $-78$  °C at which point trifluoromethane sulfonic anhydride (70  $\mu\text{L}$ , 0.42 mmol, 1.4 equiv) was added and the reaction was warmed to  $0$  °C over 2 h. The reaction mixture was quenched with MeOH (1 mL) and evaporated to dryness. Silica gel chromatography with hexanes/ethyl acetate (150:1) resulted in pure **S14** (66 mg, 0.20 mmol, 66%).  $R_f = 0.85$  in 4:1 hexane/ethyl acetate.  $^1\text{H}$  NMR (500 MHz,  $\text{CDCl}_3$ ):  $\delta$  7.47 (dd,  $J = 7.6, 1.4$  Hz, 1H), 7.30-7.24 (m, 2H), 7.20 (td,  $J = 7.4, 1.7$  Hz, 1H), 6.62 (s, 1H), 2.86 (s, 2H), 1.42 (s, 6H).  $^{13}\text{C}$  NMR (150 MHz,  $\text{CDCl}_3$ ):  $\delta$  158.3, 139.2, 133.9, 132.9, 131.5, 128.2, 127.2, 122.0, 118.7 (q,  $J = 320$  Hz), 45.5, 44.5, 27.3.  $^{19}\text{F}$  NMR (565 MHz,  $\text{CDCl}_3$ ):  $\delta$  -75.63. HRMS (EI): Calcd. for  $\text{C}_{13}\text{H}_{13}\text{O}_3\text{S}_2\text{F}_3^+$   $[\text{M}]^+$  338.0258, found 338.0262;  $[\text{M}-\text{C}_4\text{H}_8]^+$ , 150;  $[\text{M}-\text{C}_5\text{H}_8\text{O}]^+$ , 122.

### **Triazole products (S15 and S16).**

Vinyl triflate **S14** (10 mg, 0.030 mmol, 1.0 equiv.) was dissolved in THF (1.0 mL, anhydrous). NaH (10 mg, 60% in mineral oil, 0.26 mmol, 8.7 equiv.) was added to this solution followed by benzyl azide (15  $\mu\text{L}$ , 0.12 mmol, 4.0 equiv.). The mixture was allowed to stir overnight. The following day the reaction was quenched with MeOH (0.25 mL) and evaporated to dryness. The crude reaction mixture was purified by silica gel chromatography (6:1, 4:1, 1:1 hexanes/ethyl acetate). This procedure resulted in 5 mg of pure **S15** and **S16** (0.016 mmol, 53%) in a 1:0.6 ratio.  $R_f = 0.25$  in 4:1 hexane/ethyl acetate.  $^1\text{H}$  NMR (600 MHz, MeOD):  $\delta$  8.21 (d,  $J = 7.8$  Hz, 1H), 7.60 (d,  $J = 7.8$  Hz,

1H'), 7.56 (d,  $J = 7.8$  Hz, 1H'), 7.52 (d,  $J = 7.7$  Hz, 1H), 7.39-7.35 (m, 3H, 2H'), 7.31-7.22 (m, 2H, 3H'), 7.08 (d,  $J = 7.7$  Hz, 2H), 6.96 (d,  $J = 6.8$  Hz, 2H'), 5.92 (s, 2H), 5.69 (s, 2H'), 2.96 (s, 2H), 2.90 (s, 2H'), 1.50 (s, 6H'), 1.46 (s, 6H).  $^{13}\text{C}$  NMR (150 MHz, MeOD):  $\delta$  154.0, 143.5, 143.0, 142.1, 139.5, 138.2, 137.4, 134.8, 134.5, 133.1, 132.4, 131.5, 131.1, 130.2, 130.0, 129.9, 129.9, 129.1, 129.0, 128.8, 128.6, 128.6, 127.8, 127.54, 127.52, 55.0, 54.1, 51.6, 51.2, 49.7, 39.5, 39.0, 30.4, 28.4. HRMS (ESI): Calcd. for  $\text{C}_{19}\text{H}_{20}\text{N}_3\text{S}^+$   $[\text{M}+\text{H}]^+$  322.1372, found 322.1374.

**Figure S5**

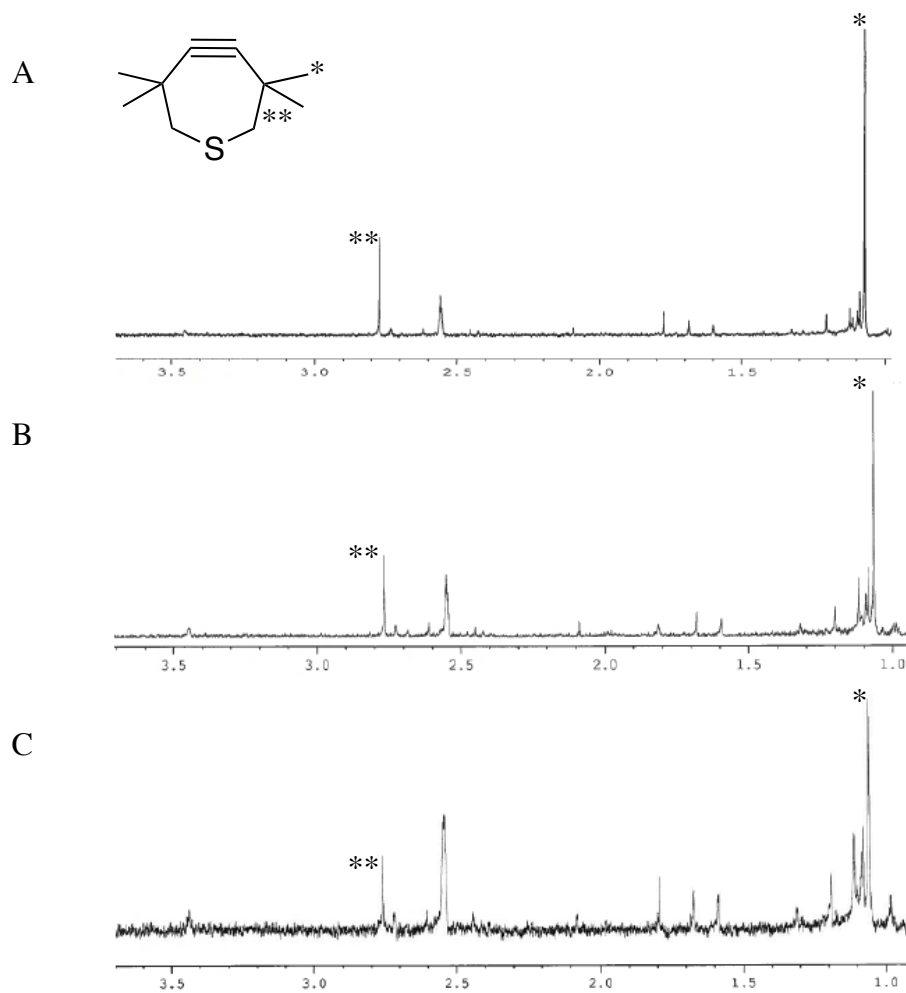

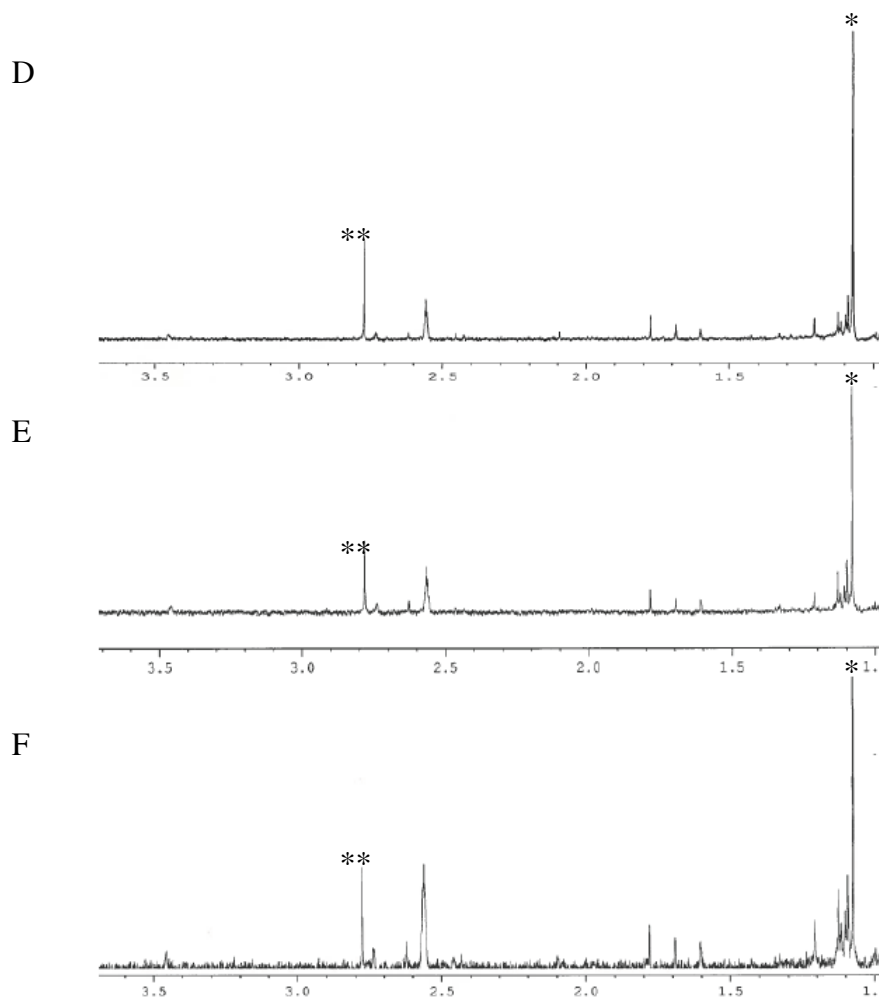

**Figure S5.**

A 100 mM solution of TMTH (**10**) in  $d_6$ -DMSO was diluted in  $D_2O$  (A, B, C, D) or deuterated PBS (a solution of PBS was lyophilized and the residue dissolved in  $D_2O$ ) (E, F) to a final concentration of 1 mM. The solution was allowed to sit at room temperature and an NMR taken (Bruker AV-500) at 10 minutes (A, D), 48 h (B, E), and 144 h (C, F). After 48 h, the amount of TMTH has decreased in both samples. The compound still persists after 144 h, though significant amounts are lost.



Figure S6

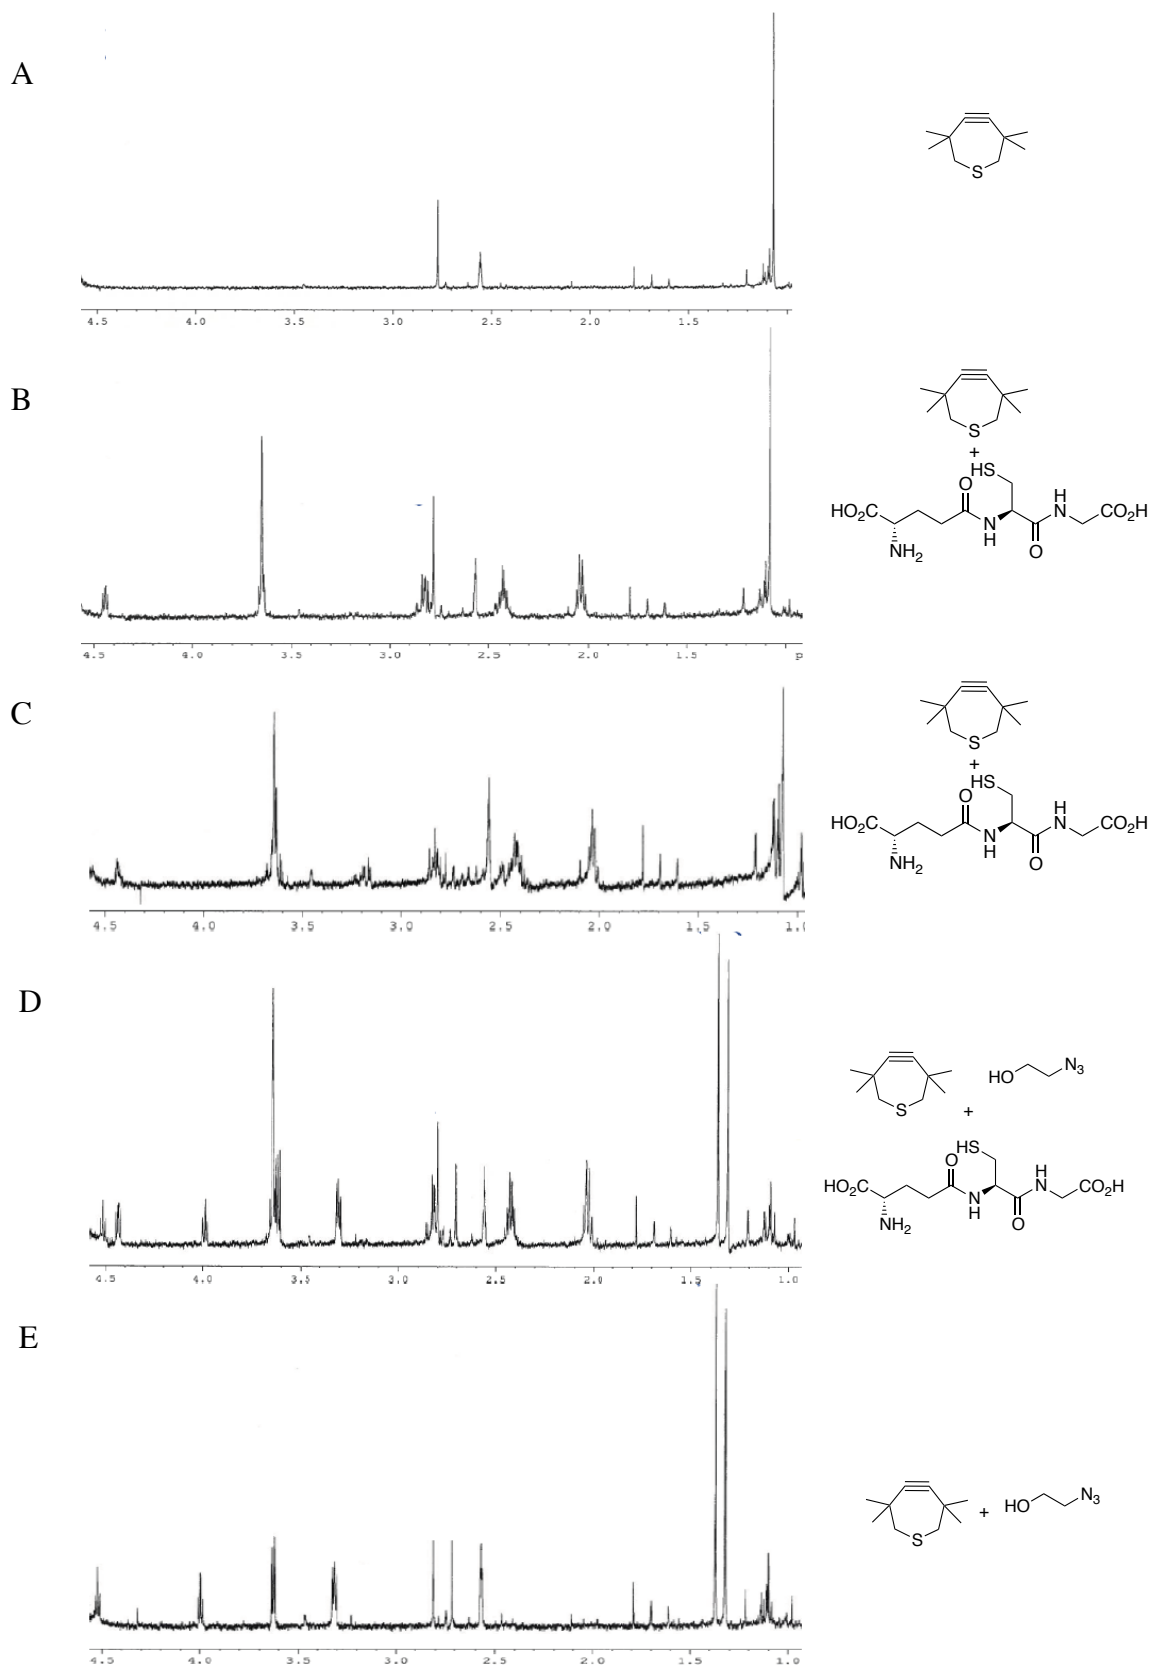

**Figure S6.**

TMTH reacts more readily with 2-azidoethanol than glutathione in PBS. All NMR spectra were taken on Bruker AV-500 or Bruker AV-600. A) A 1 mM solution of TMTH in deuterated PBS B) A solution of 1 mM TMTH and 1 mM glutathione in deuterated PBS was allowed to react for 10 min. No reaction is observed. C) A solution of 1 mM TMTH and 1 mM glutathione in deuterated PBS was allowed to react for 26 h. No starting TMTH is present, and the product methyl peaks appear at ~1.1 ppm. D) TMTH was added to a final concentration of 1 mM TMTH to a solution of 1 mM 2-azidoethanol and 1 mM glutathione in deuterated PBS. The NMR taken after 10 min indicates no remaining TMTH and methyl peaks corresponding to those of the cycloadduct with 2-azidoethanol. E) A solution of 1 mM TMTH and 1 mM azidoethanol in deuterated PBS was allowed to react for 10 min. No starting TMTH is present, and the product methyl peaks appear at ~ 1.3 – 1.4 ppm.

**Western Blot Competition Experiments**

Western blot analysis was performed on Jurkat cell lysates. Jurkat cells were incubated in the described media containing 25  $\mu$ M Ac<sub>4</sub>GalNAz or DMSO vehicle for 3 days. They were then washed in Dulbecco's modified PBS and lysed in 1% NP-40, NaCl (150 mM), Tris pH 7.4 with protease inhibitors. The cell lysate was then sonicated and cleared by centrifugation. Protein concentration was normalized using a BCA assay.

**Figure 2:** TMTH (**10**) was added at varying concentrations for 1.5 hours. Phosphine-FLAG (500  $\mu$ M final concentration) was added to the protein solutions and the vials agitated overnight.

**Figure S8:** Phosphine-FLAG (500  $\mu$ M final concentration) was added to the protein solutions at 0° C. TMTH (**10**) was then added at varying concentrations and the vials agitated at room temperature overnight.

The following day, 4X loading buffer was added and the proteins were separated on a 4-12% Bis-Tris gradient SDS-PAGE gel at 140 V (Bio-Rad, Criterion system). They were then electroblotted onto nitrocellulose, blocked in 5% bovine serum albumin (BSA, Sigma) in Tris-buffered saline with Tween (TBST, 10 mM Tris pH 8.0, 150 mM NaCl, 0.1% Tween-20), and treated with anti-FLAG (M2, Sigma, 1:1000 dilution in 5% BSA in TBST from stock) overnight at 4 °C. The blots were washed with TBST three times for ten min then treated with anti-mouse  $\kappa$  light chain-HRP-conjugated secondary antibody (Southern Biotech, 1:5000 dilution in 5% BSA in TBST). The blots were again washed with TBST three times for ten min and analyzed by standard enhanced chemiluminescence immunoblotting methods (Pierce).

The blots were stored at 4 °C. India ink staining was performed by washing the blots copiously with deionized water 3x for ten min then TBST for ten min. The blot was then incubated in 1:1000 dilution of India ink in TBST for 1 h then washed for 30 s with water and ten min with TBS.

**Figure S7**

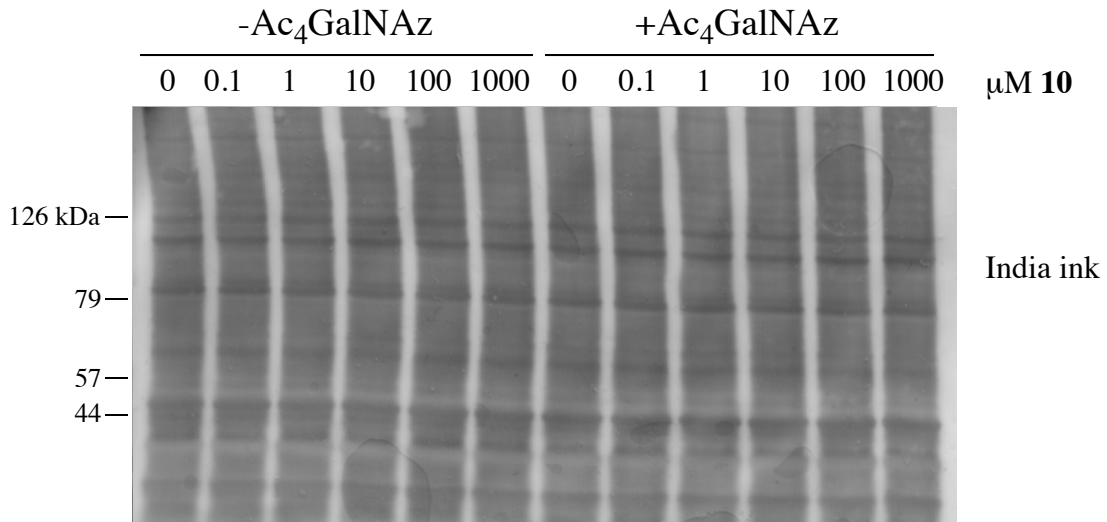

**Figure S7.**  
India ink staining of the western blot shown in Figure 2

**Figure S8**

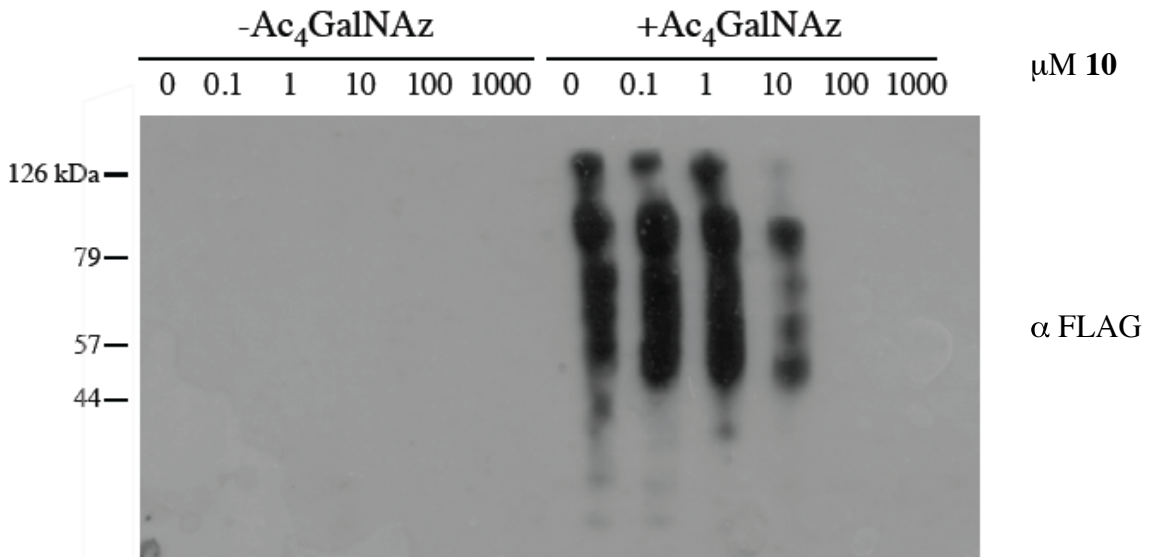

**Figure S8.**  
Simultaneous treatment Ac<sub>4</sub>GalNAz-labeled cells with TMTH and phosphine-FLAG inhibits phosphine-FLAG dependent labeling. Jurkat cells were incubated with Ac<sub>4</sub>-GalNAz (50 $\mu\text{M}$ ) or vehicle for 3 d and then lysed. The lysates were treated with phosphine-FLAG (500 $\mu\text{M}$ ) at 0 $^{\circ}\text{C}$  then TMTH (concentrations from 1 nM to 1 mM) and allowed to warm to room temperature and incubate overnight. The lysates were analyzed

by Western blot using an anti-FLAG antibody then a secondary antibody conjugated to horse radish peroxidase.

**Figure S9**

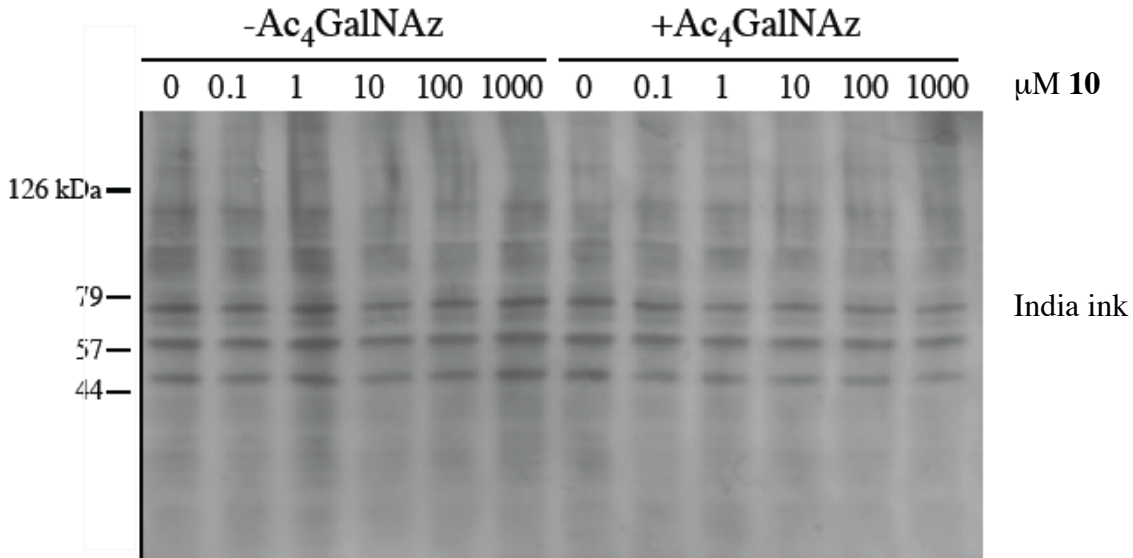

**Figure S9.**

India ink staining of the western blot shown in Figure S8.

### **Barstar Expression and Purification**

A plasmid (pQE30-Barstar) containing the *Bacillus amyloliquefaciens* protein Barstar as a 6xHis fusion and with two point mutations for improved stability (Cys53Ala and Cys95Ala) in a pQE30 expression vector was obtained from D. Tirrell (California Institute of Technology). For incorporation of the unnatural amino acid azidohomoalanine (AHA), the *E. coli* methionine auxotrophic strain M15-MA was also obtained from D. Tirrell.

To generate both the wild-type Barstar protein (Barstar-MET) and the AHA containing Barstar protein (Barstar-AHA) we followed an expression protocol similar to that reported by Beatty et. al.<sup>[5]</sup> Briefly, the pQE30-Barstar plasmid was transformed into M15-MA cells and individual transformants were used to inoculate 5 mL of M9 minimal media supplemented with 0.04 mg/mL of each of the 20 amino acids, 1mM MgSO<sub>4</sub>, 5 μg/mL thiamine, 0.4% glucose, 200 μg/mL ampicillin and 35 μg/mL kanamycin (i.e., M9 complete media with 20 amino acids). After an overnight incubation at 37 °C with shaking, 1 mL was transferred to 50 mL of M9 complete media with 20 amino acids. After reaching an OD<sub>600</sub> of 1.0, the cells were pelleted (6100g for 10 min at 4 °C) and washed three times with a sterile solution of ice-cold 0.9% (w/v) NaCl. The culture was resuspended in M9 complete medium with 19 amino acids (no methionine) and divided in half; one sample was supplemented with 1mM methionine (Barstar-MET) while the other was supplemented with 1mM AHA (Barstar-AHA). After 15 min at 37 °C with



give desired product **S17** (4.5 mg, 0.015 mmol, 36%).  $R_f = 0.55$  in 3:1 hexane/EtOAc.  $^1\text{H}$  NMR (500 MHz,  $\text{CDCl}_3$ ):  $\delta$  8.26 (d,  $J = 9.1$  Hz, 2H), 7.37 (d,  $J = 9.5$  Hz, 2H), 5.14-5.09 (m, 1H), 3.21 (d,  $J = 15.6$  Hz, 1H), 3.07 (dt,  $J = 14.4, 3.7$  Hz, 1H), 2.91 (dd,  $J = 15.2, 9.0$  Hz, 1H), 2.81-2.69 (m, 2H), 2.54-2.37 (m, 3H).  $^{13}\text{C}$  NMR (150 MHz,  $\text{CDCl}_3$ )  $\delta$  155.3, 151.4, 145.2, 125.3, 121.7, 92.3, 88.0, 82.9, 40.4, 38.5, 25.4, 23.2. HRMS (EI): calcd for  $\text{C}_{14}\text{H}_{13}\text{O}_5\text{NS}^+ [\text{M}]^+$ , 307.0514; found, 307.0514;  $[\text{M}-\text{NO}_2]^+$ , 261;  $[\text{M}-\text{C}_7\text{H}_5\text{NO}_5]^+$ , 124.

### **2-thiocyclooct-7-yn-1-(Biotin-PEG<sub>3</sub>)carbamate (S18).**

2-thiocyclooct-7-yn-1-(*p*-nitrophenyl)carbonate **S17** (4.5 mg, 0.015 mmol, 1.0 equiv) was dissolved in DMF (380  $\mu\text{L}$ , anhydrous). To this solution, triethylamine (5  $\mu\text{L}$ , 0.036 mmol, 2.4 equiv) and Biotin-PEG<sub>3</sub>-amine<sup>[6]</sup> (7.4 mg, 0.0156 mmol, 1.0 equiv) were added. The reaction was stirred overnight at rt. The following day the reaction mixture was evaporated to dryness and the crude product was purified by silica gel chromatography (10:1 to 4:1 hexanes/EtOAc). This procedure resulted in 4.2 mg of desired product (0.0068 mmol, 45 %).  $R_f = 0.2$  in 3:1 hexane/EtOAc.  $^1\text{H}$  NMR (600 MHz, MeOD):  $\delta$  4.94-4.90 (m, 1H), 4.50-4.48 (m, 1H), 4.31-4.29 (m, 1H), 3.64-3.61 (m, 4H), 3.60-3.57 (m, 4H), 3.53-3.50 (m, 4H), 3.26 (t,  $J = 6.8$  Hz, 2H), 3.22-3.16 (m, 3H), 3.04 (d,  $J = 14.9$  Hz, 2H), 2.93 (dd,  $J = 12.8, 4.9$  Hz, 1H), 2.77 (dd,  $J = 15.1, 9.0$  Hz, 1H), 2.70 (d,  $J = 12.7$  Hz, 2H), 2.59-2.56 (m, 1H), 2.40-2.37 (m, 1H), 2.32-2.21 (m, 2H), 2.20 (t,  $J = 7.4$  Hz, 2H), 1.77-1.68 (m, 8H), 1.43-1.46 (m, 2H).  $^{13}\text{C}$  NMR (150 MHz, MeOD)  $\delta$  174.5, 164.7, 155.6, 88.7, 78.7, 70.1, 69.8, 69.8, 68.5, 68.3, 61.9, 60.2, 55.6, 40.7, 39.6, 38.0, 37.7, 36.4, 35.4, 29.4, 29.0, 28.4, 28.1, 25.4, 24.8, 22.5, 20.1. HRMS (ESI): calcd for  $\text{C}_{28}\text{H}_{47}\text{O}_7\text{N}_4\text{S}_2^+ [\text{M}+\text{H}]^+$ , 615.2881; found, 615.2874.

### **Cell culture procedures**

Jurkat (human T-cell lymphoma) cells were grown in RPMI-1640 media containing 10% fetal bovine serum, streptomycin (0.1 mg/ mL), and penicillin (100 units/ mL). Cells were grown in the presence of 5%  $\text{CO}_2$  and maintained at densities between  $1 \times 10^5$  and  $2 \times 10^6$  cells/ mL.

### **Cell surface azide labeling**

Jurkat cells were incubated in the described media containing 25  $\mu\text{M}$   $\text{Ac}_4\text{ManNAz}$  or DMSO vehicle for 3 days. The cells were then pelleted (1500 rpm, 3 min, 4  $^\circ\text{C}$ ) and resuspended in 10 mL FACS buffer (PBS with 1% fetal bovine serum) twice. The cell suspension was then transferred to a 96 well V-bottom plate. The cells were pelleted by centrifugation (3500 rpm, 3 min, 4  $^\circ\text{C}$ ). The cells were then resuspended PBS containing 250  $\mu\text{M}$  thiaOCT-biotin, DIMAC-biotin, or vehicle and incubated at rt for 1 h. The cells were washed with FACS buffer (3 x 200  $\mu\text{L}$ , 3500 rpm, 3 min, 4  $^\circ\text{C}$ ) and resuspended in FACS buffer containing FITC-avidin (100  $\mu\text{L}$ , 1:200 dilution of 1 mg/ mL stock, Sigma-Aldrich) and incubated in the dark at 4  $^\circ\text{C}$  for 15 minutes. The cells were washed with FACS buffer (1 x 200  $\mu\text{L}$ , 3500 rpm, 3 min, 4  $^\circ\text{C}$ ) and again subjected to FITC-avidin (same conditions as first incubation). The cells were concentrated by centrifugation (3500 rpm, 3 min, 4  $^\circ\text{C}$ ) and resuspended in 200  $\mu\text{L}$  cold FACS buffer three times. The cell

suspensions were then diluted to 400  $\mu\text{L}$  for flow cytometry analysis. Flow cytometry was performed on a BD Biosciences FACSCalibur flow cytometer equipped with a 488-nm argon laser.

## Figure S10

A

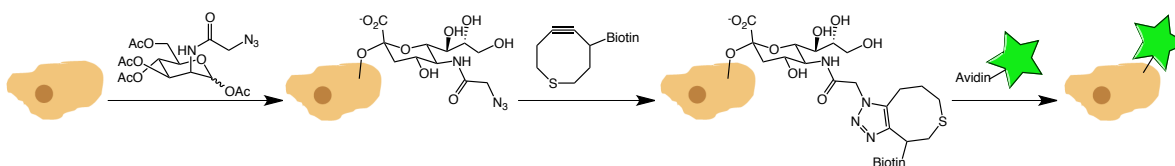

B

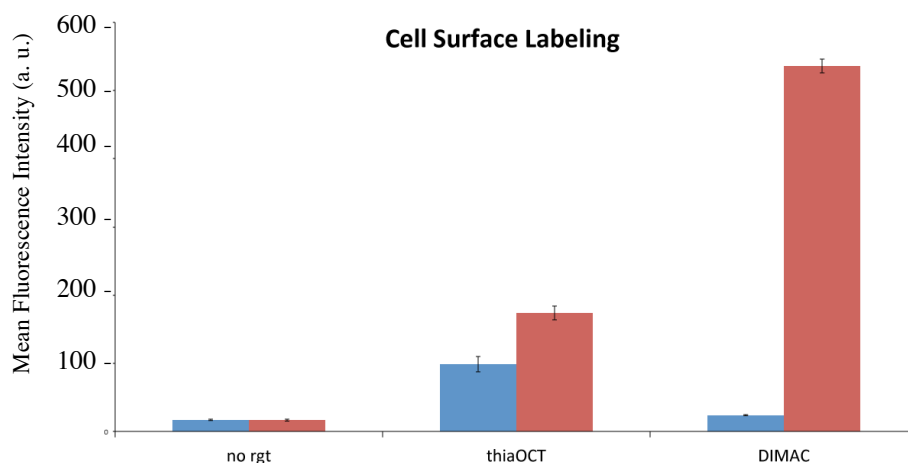

## Figure S10.

ThiaOCT can label azides on cell surfaces. A) Schematic for flow cytometry analysis of live cell labeling with thiaOCT. B) Quantification of cell-surface labeling with thiaOCT-biotin (**S18**). Cells are grown in the presence (red bars) or absence (blue bars) of 25  $\mu\text{M}$   $\text{Ac}_4\text{ManNAz}$  for 3 days. The cells were then treated with no reagent, 250  $\mu\text{M}$  thiaOCT-biotin (**S18**), or 250  $\mu\text{M}$  DIMAC-biotin<sup>[7]</sup> followed by FITC-avidin. Error bars represent the standard deviation of three replicate experiments.

**Figure S11**

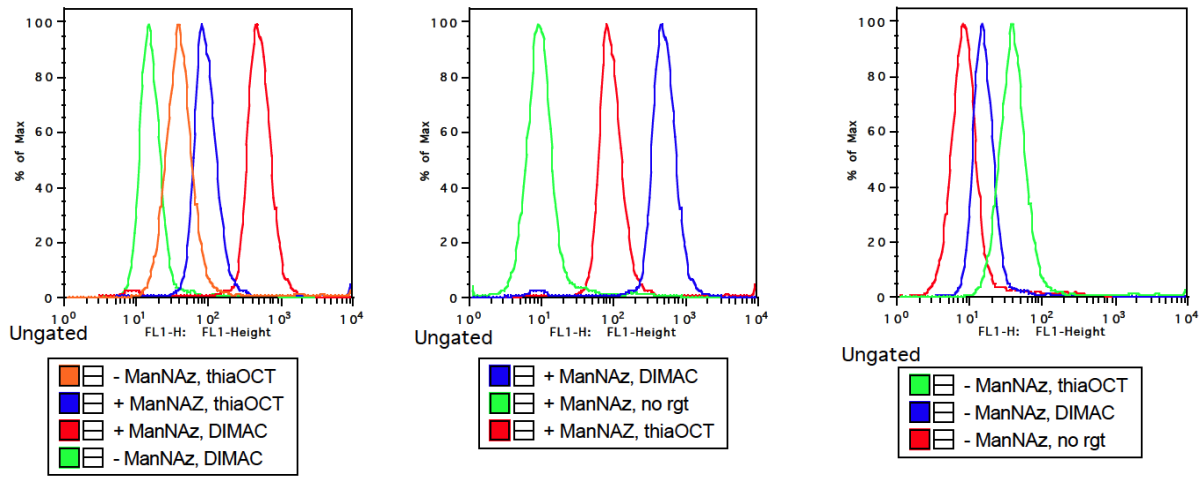

**Figure S11.**

Representative histograms of fluorescence (x-axis) vs % of total cell counts (y-axis) for the experiment described in Figure S10. Jurkat cells were treated with (+ ManNAz) or without (- ManNAz) 25  $\mu$ M Ac<sub>4</sub>ManNAz for 3 days and then treated with 250  $\mu$ M thiaOCT-biotin, DIMAC-biotin, or vehicle followed by FITC-avidin.



**Figure S12**

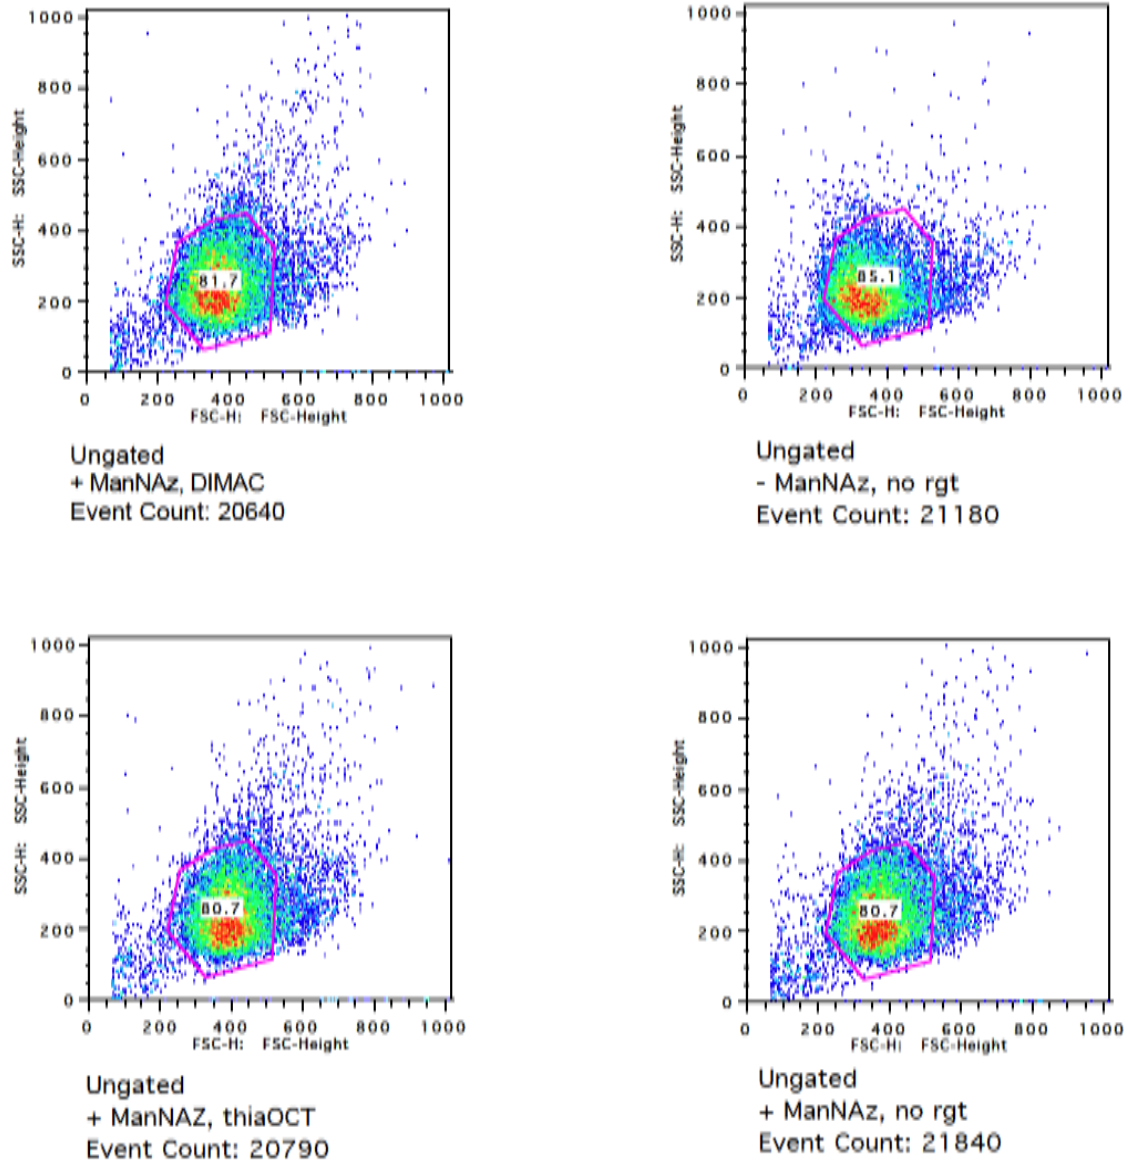

**Figure S12.**

Representative forward-scatter (x-axis) and side-scatter (y-axis) plots for the experiment described in Figure S10. Jurkat cells were treated with (+ ManNAz) or without (- ManNAz) 25  $\mu$ M Ac<sub>4</sub>ManNAz for 3 days and then treated with 250  $\mu$ M thiaOCT-biotin, DIMAC-biotin,<sup>[6]</sup> or vehicle followed by FITC-avidin.

**Figure S13**

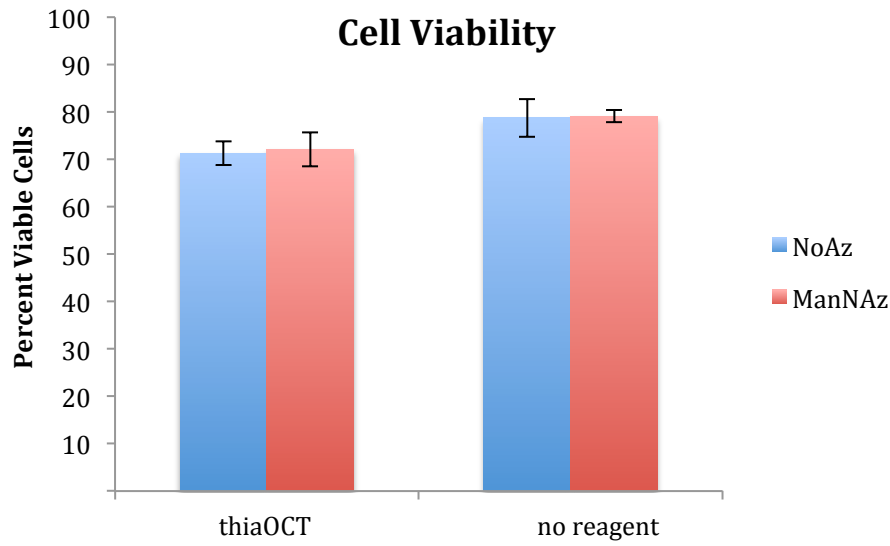

**Figure S13.**

Cytotoxicity analysis of thiaOCT-biotin **S18**. Jurkat cells were treated with (ManNAz, red bars) or without (NoAz, blue bars) 25  $\mu$ M Ac<sub>4</sub>ManNAz for 3 days and then treated with 250  $\mu$ M thiaOCT-biotin or vehicle followed by FITC-avidin. Prior to flow cytometry analysis, the cells were treated with 7-amino-actinomycin D (7-AAD) following the provided procedure.<sup>[8]</sup> The samples were diluted and analyzed by flow cytometry. The error bars represent standard deviations from three replicates.

**Figure S14.**

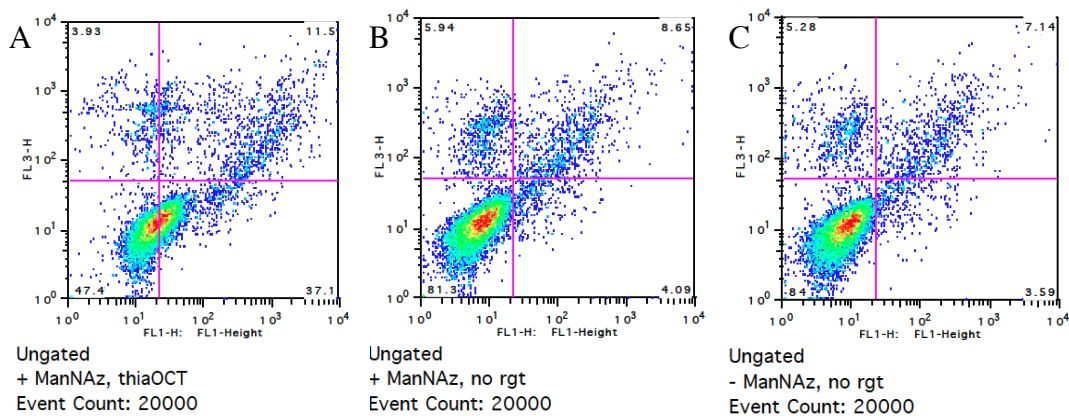

**Figure S14.**

Representative FL3 vs. FL1 scatter plots for the flow cytometry experiments described in Figure S13. In all plots, the x-axis indicates the degree of cell-surface glycan labeling as measured by FITC fluorescence (FL1), and the y-axis represents the degree of 7-AAD (FL3, cell viability marker) measured. Jurkat cells were treated with (A, B) or without (C) 25  $\mu$ M Ac<sub>4</sub>ManNAz for 3 days and then treated with 250  $\mu$ M thiaOCT-biotin (A) or

vehicle (B, C) followed by FITC-avidin. Prior to flow cytometry analysis, the cells were treated with 7-AAD following the provided procedure.<sup>[8]</sup> The samples were diluted and analyzed by flow cytometry.

- 
- [1] A. B. Pangborn, M. A. Giardello, R. H. Grubbs, R. K. Rosen, F. J. Timmers, *Organometallics* **1996**, *15*, 1518.
- [2] Okamoto, S.; Livinghouse, T. *J. Am. Chem. Soc.* **2000**, *122*, 1223-1224.
- [3] N. Feeder, M. J. Ginnelly, R. V. H. Jones, S. O'Sullivan, S. Warren, *Tet. Lett.* **1994**, *48*, 9095.
- [4] Kimling, H., Krebs, A., *Liebigs Ann. Chem.* **1974**, 2074.
- [5] K. E. Beatty, F. Xie, Q. Wang, D. A. Tirrell, *J. Am. Chem. Soc.* **2005**, *127*
- [6] D. S. Wilbur, D. K. Hamlin, R. L. Vessella, J. E. Stray, K. R. Buhler, P. S. Strayton, L. A. Klumb, P. M. Pathare, S. A. Weerawarna, *Bioconjug. Chem.* **1996**, *7*, 689.
- [7] E. M. Sletten, C. R. Bertozzi, *Org. Lett.* **2008**, *10*, 3097.
- [8] [http://www.bdbiosciences.com/external\\_files/pm/doc/tds/cell\\_bio/live/web\\_enabled/68981E\\_559925.pdf](http://www.bdbiosciences.com/external_files/pm/doc/tds/cell_bio/live/web_enabled/68981E_559925.pdf)

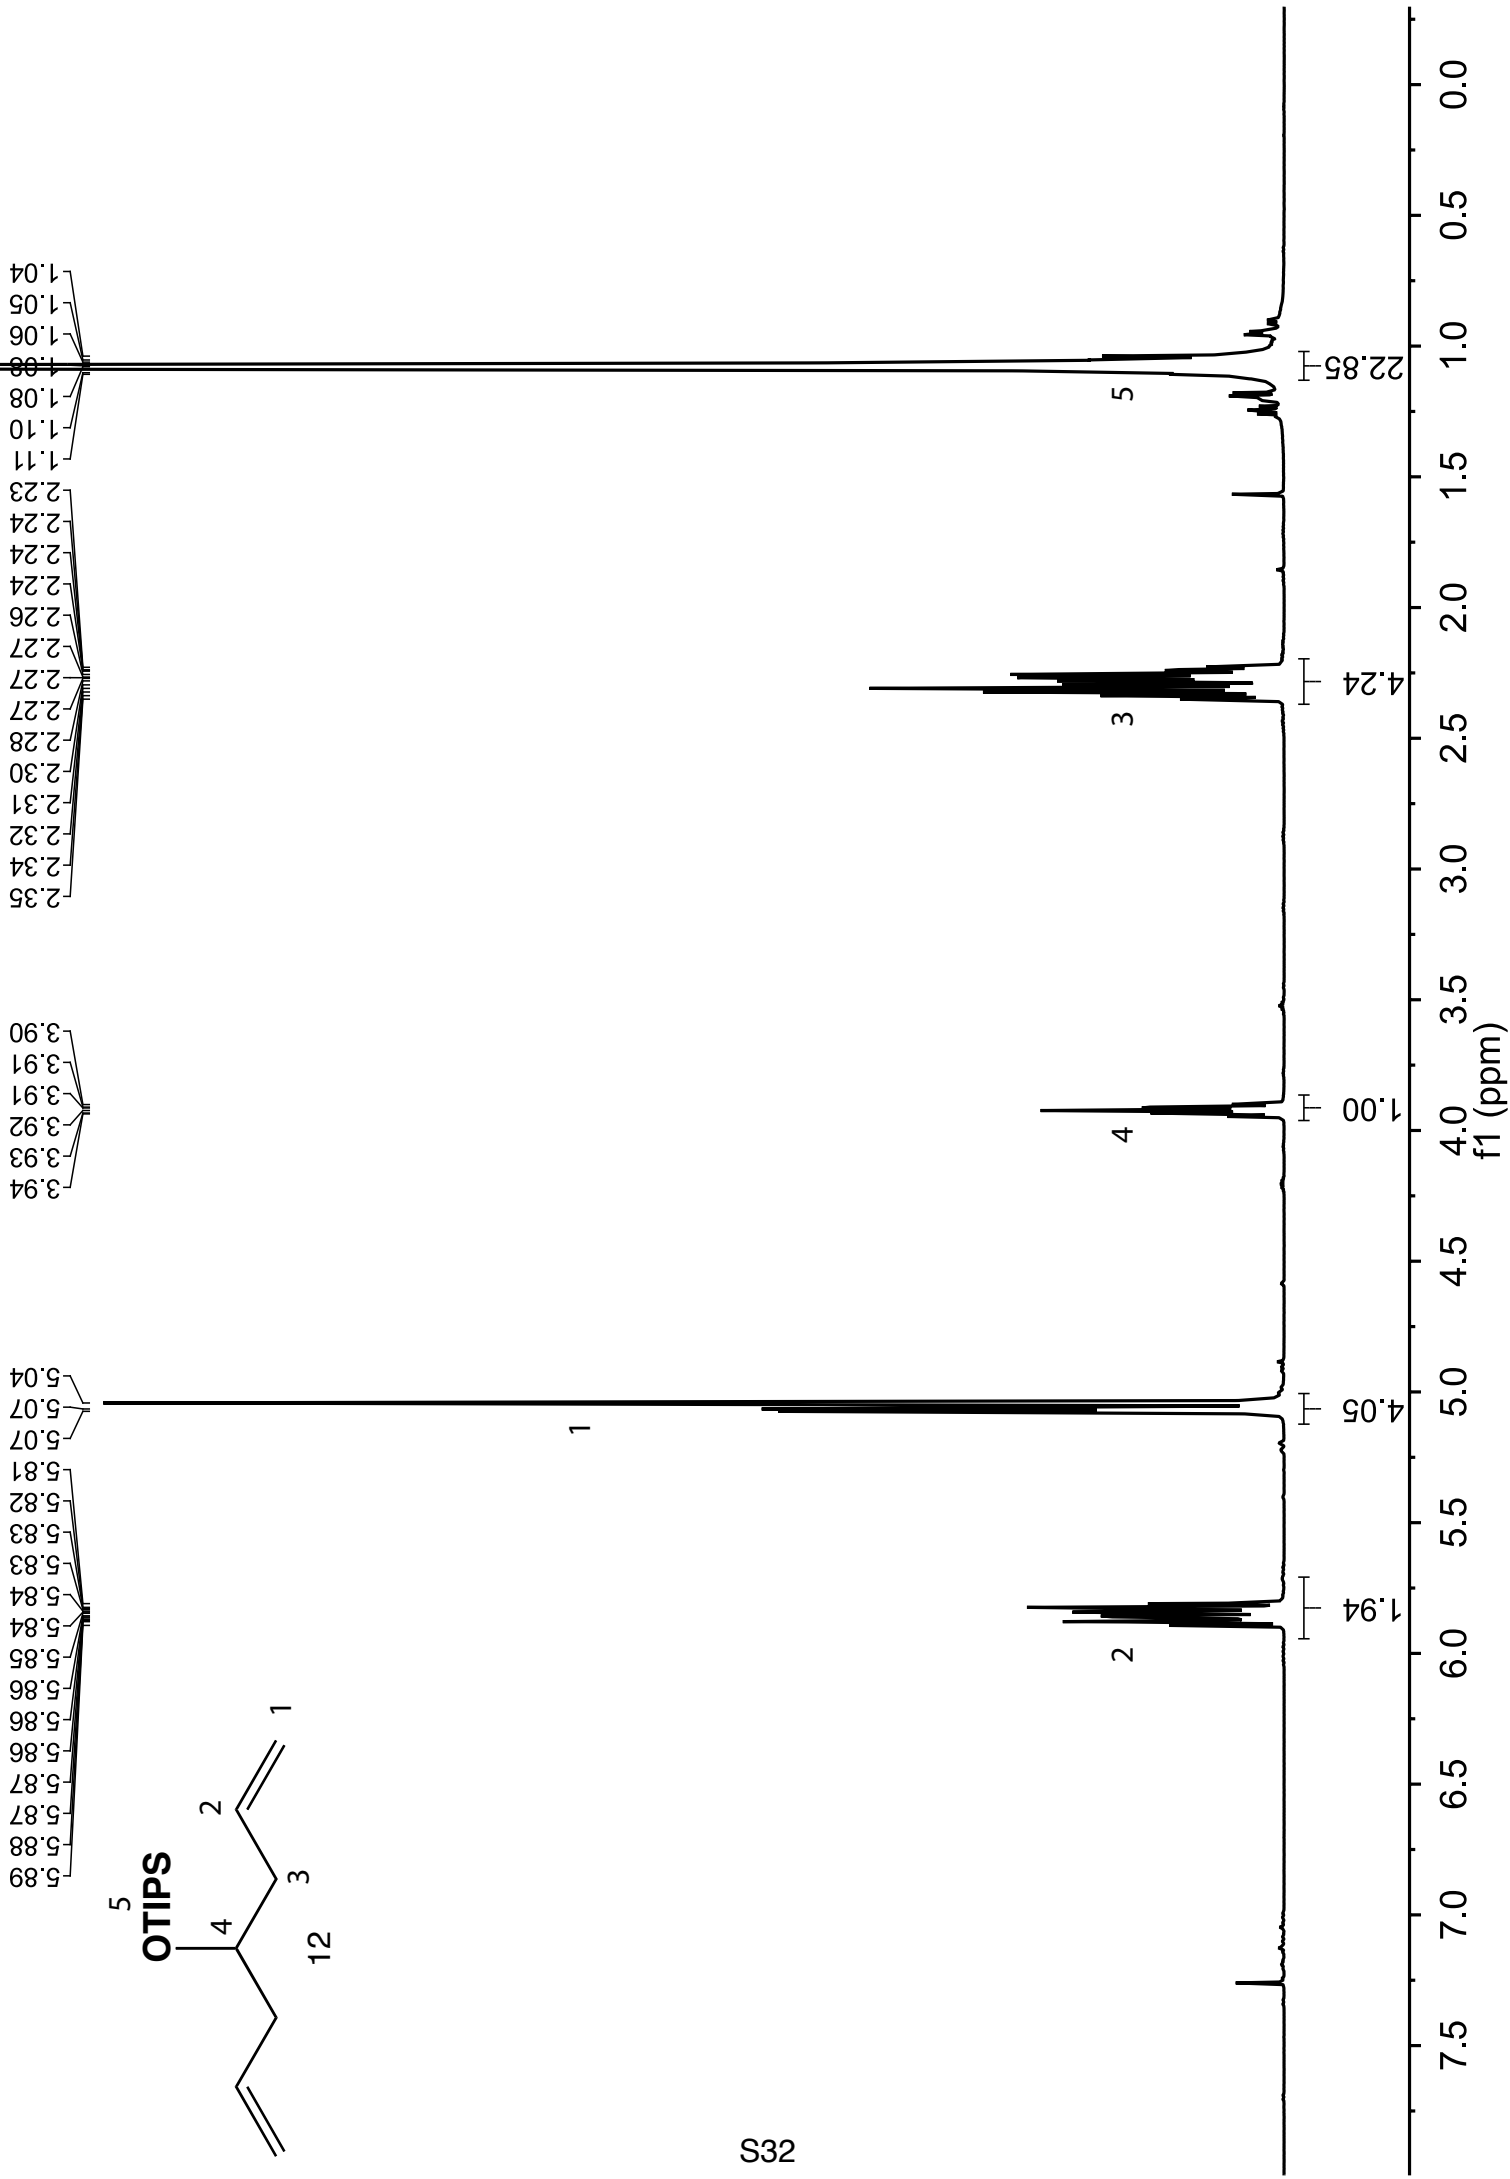

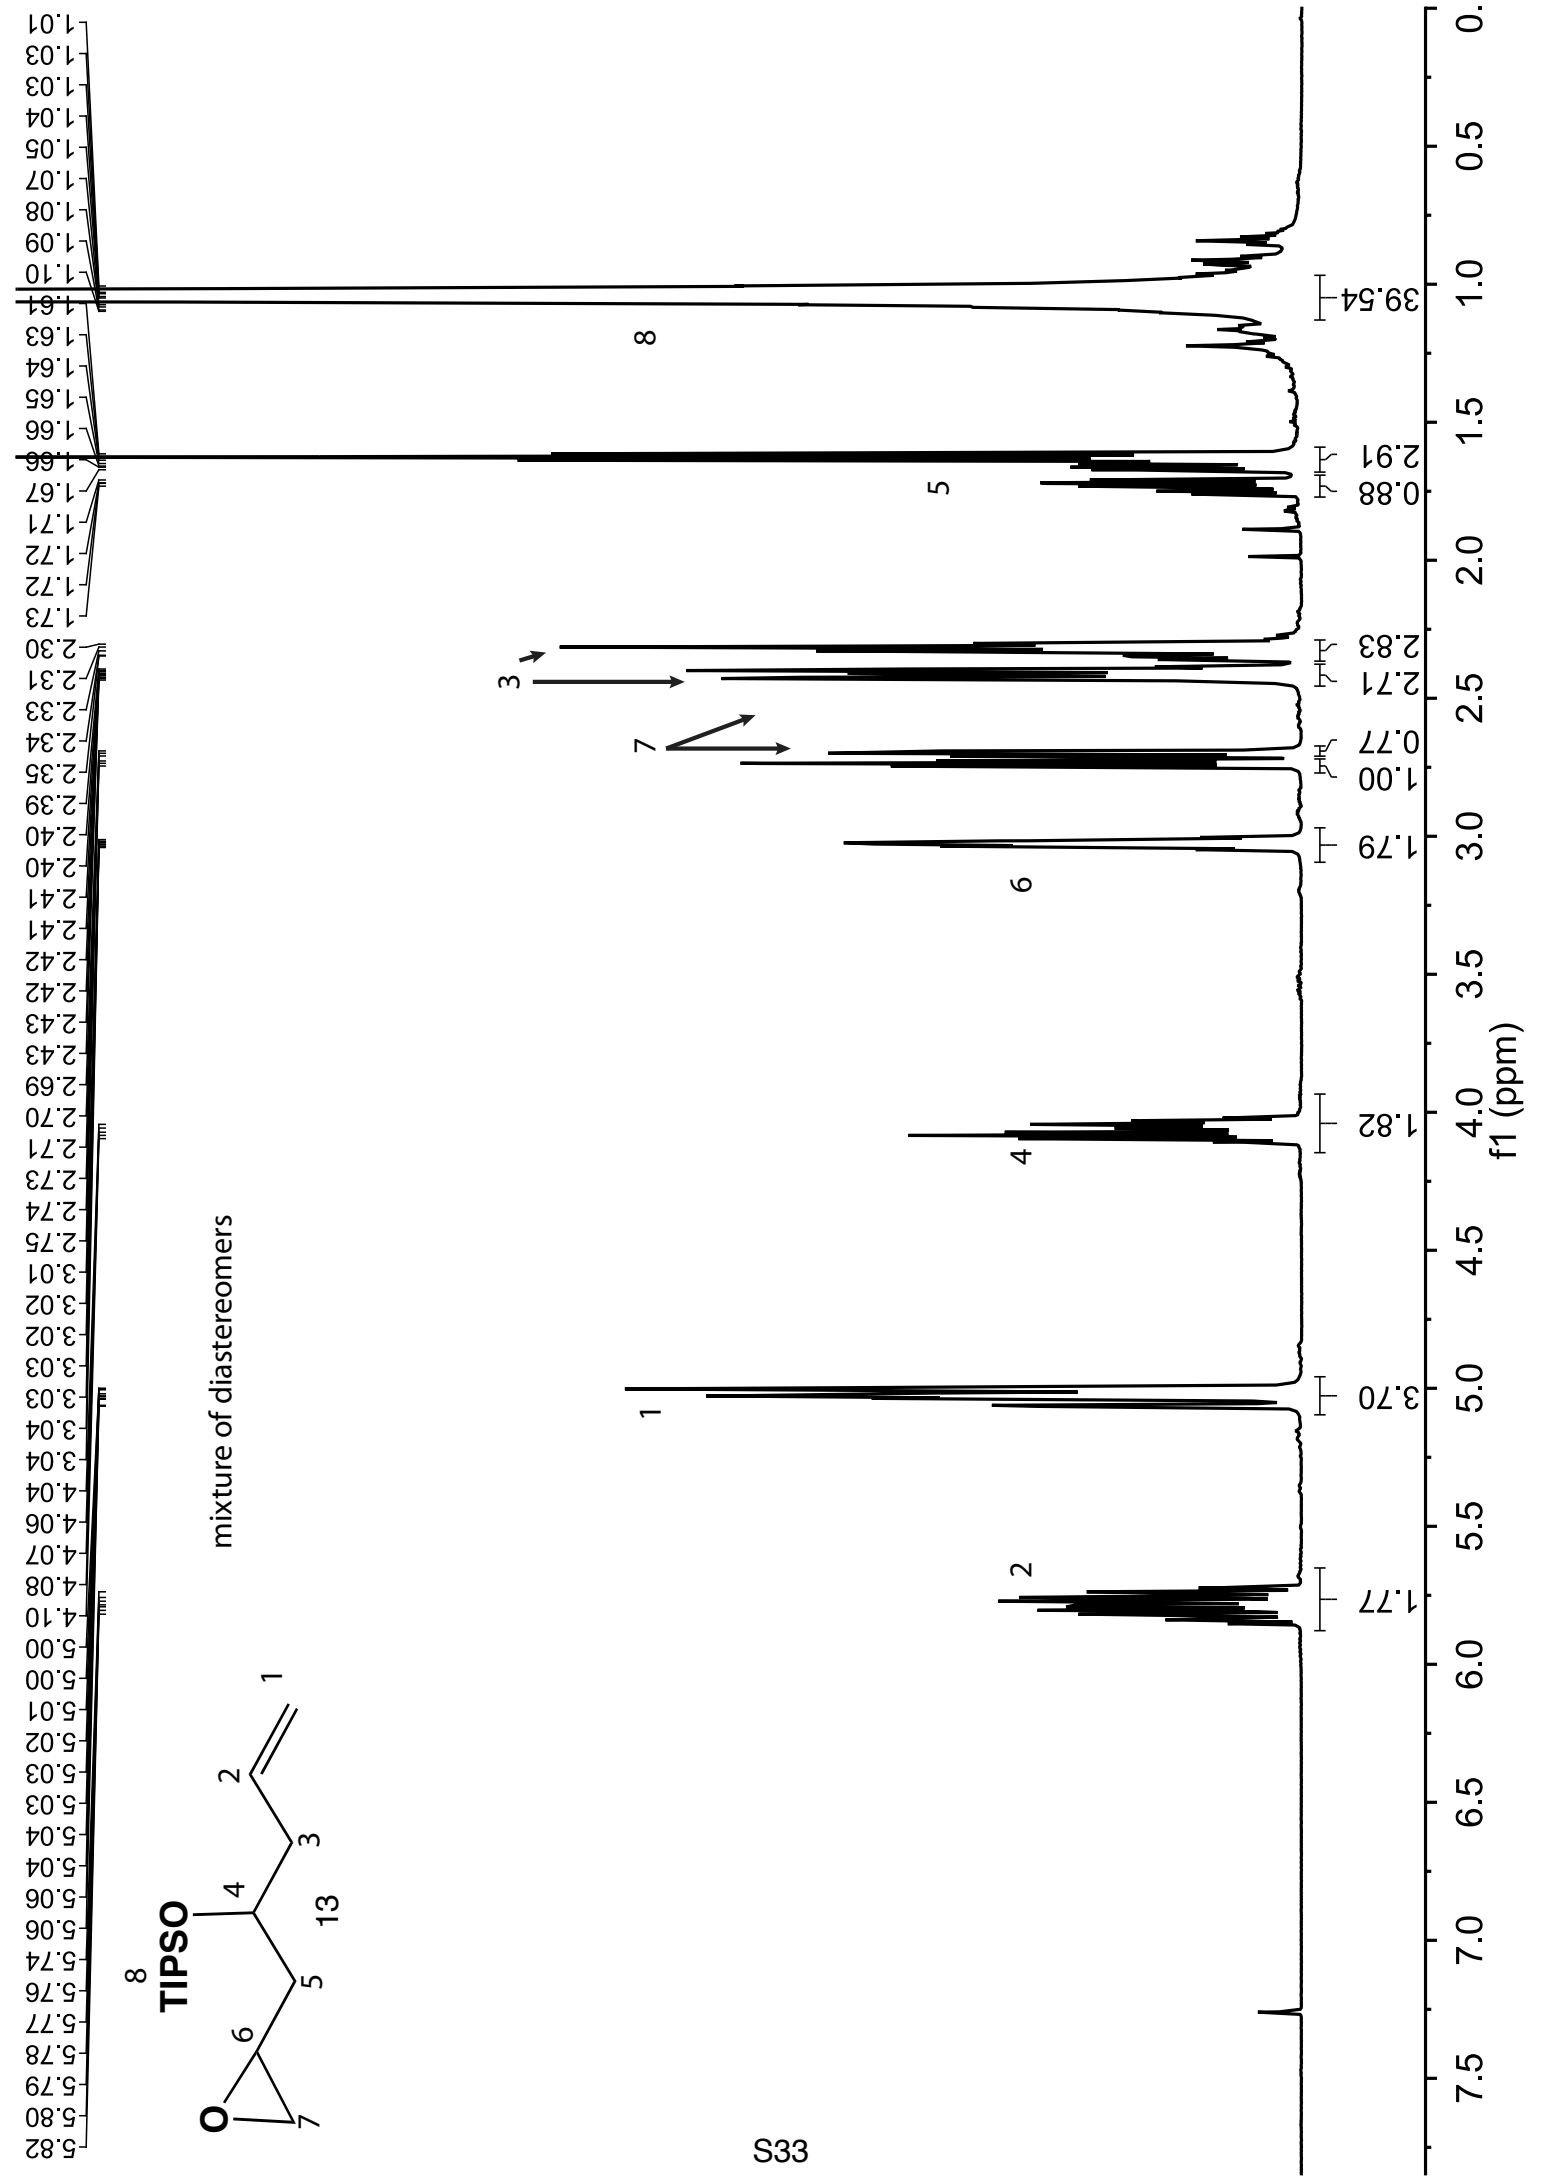

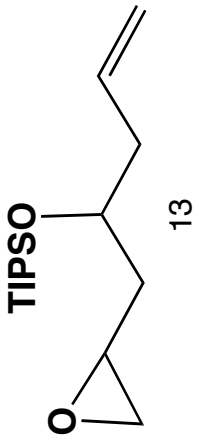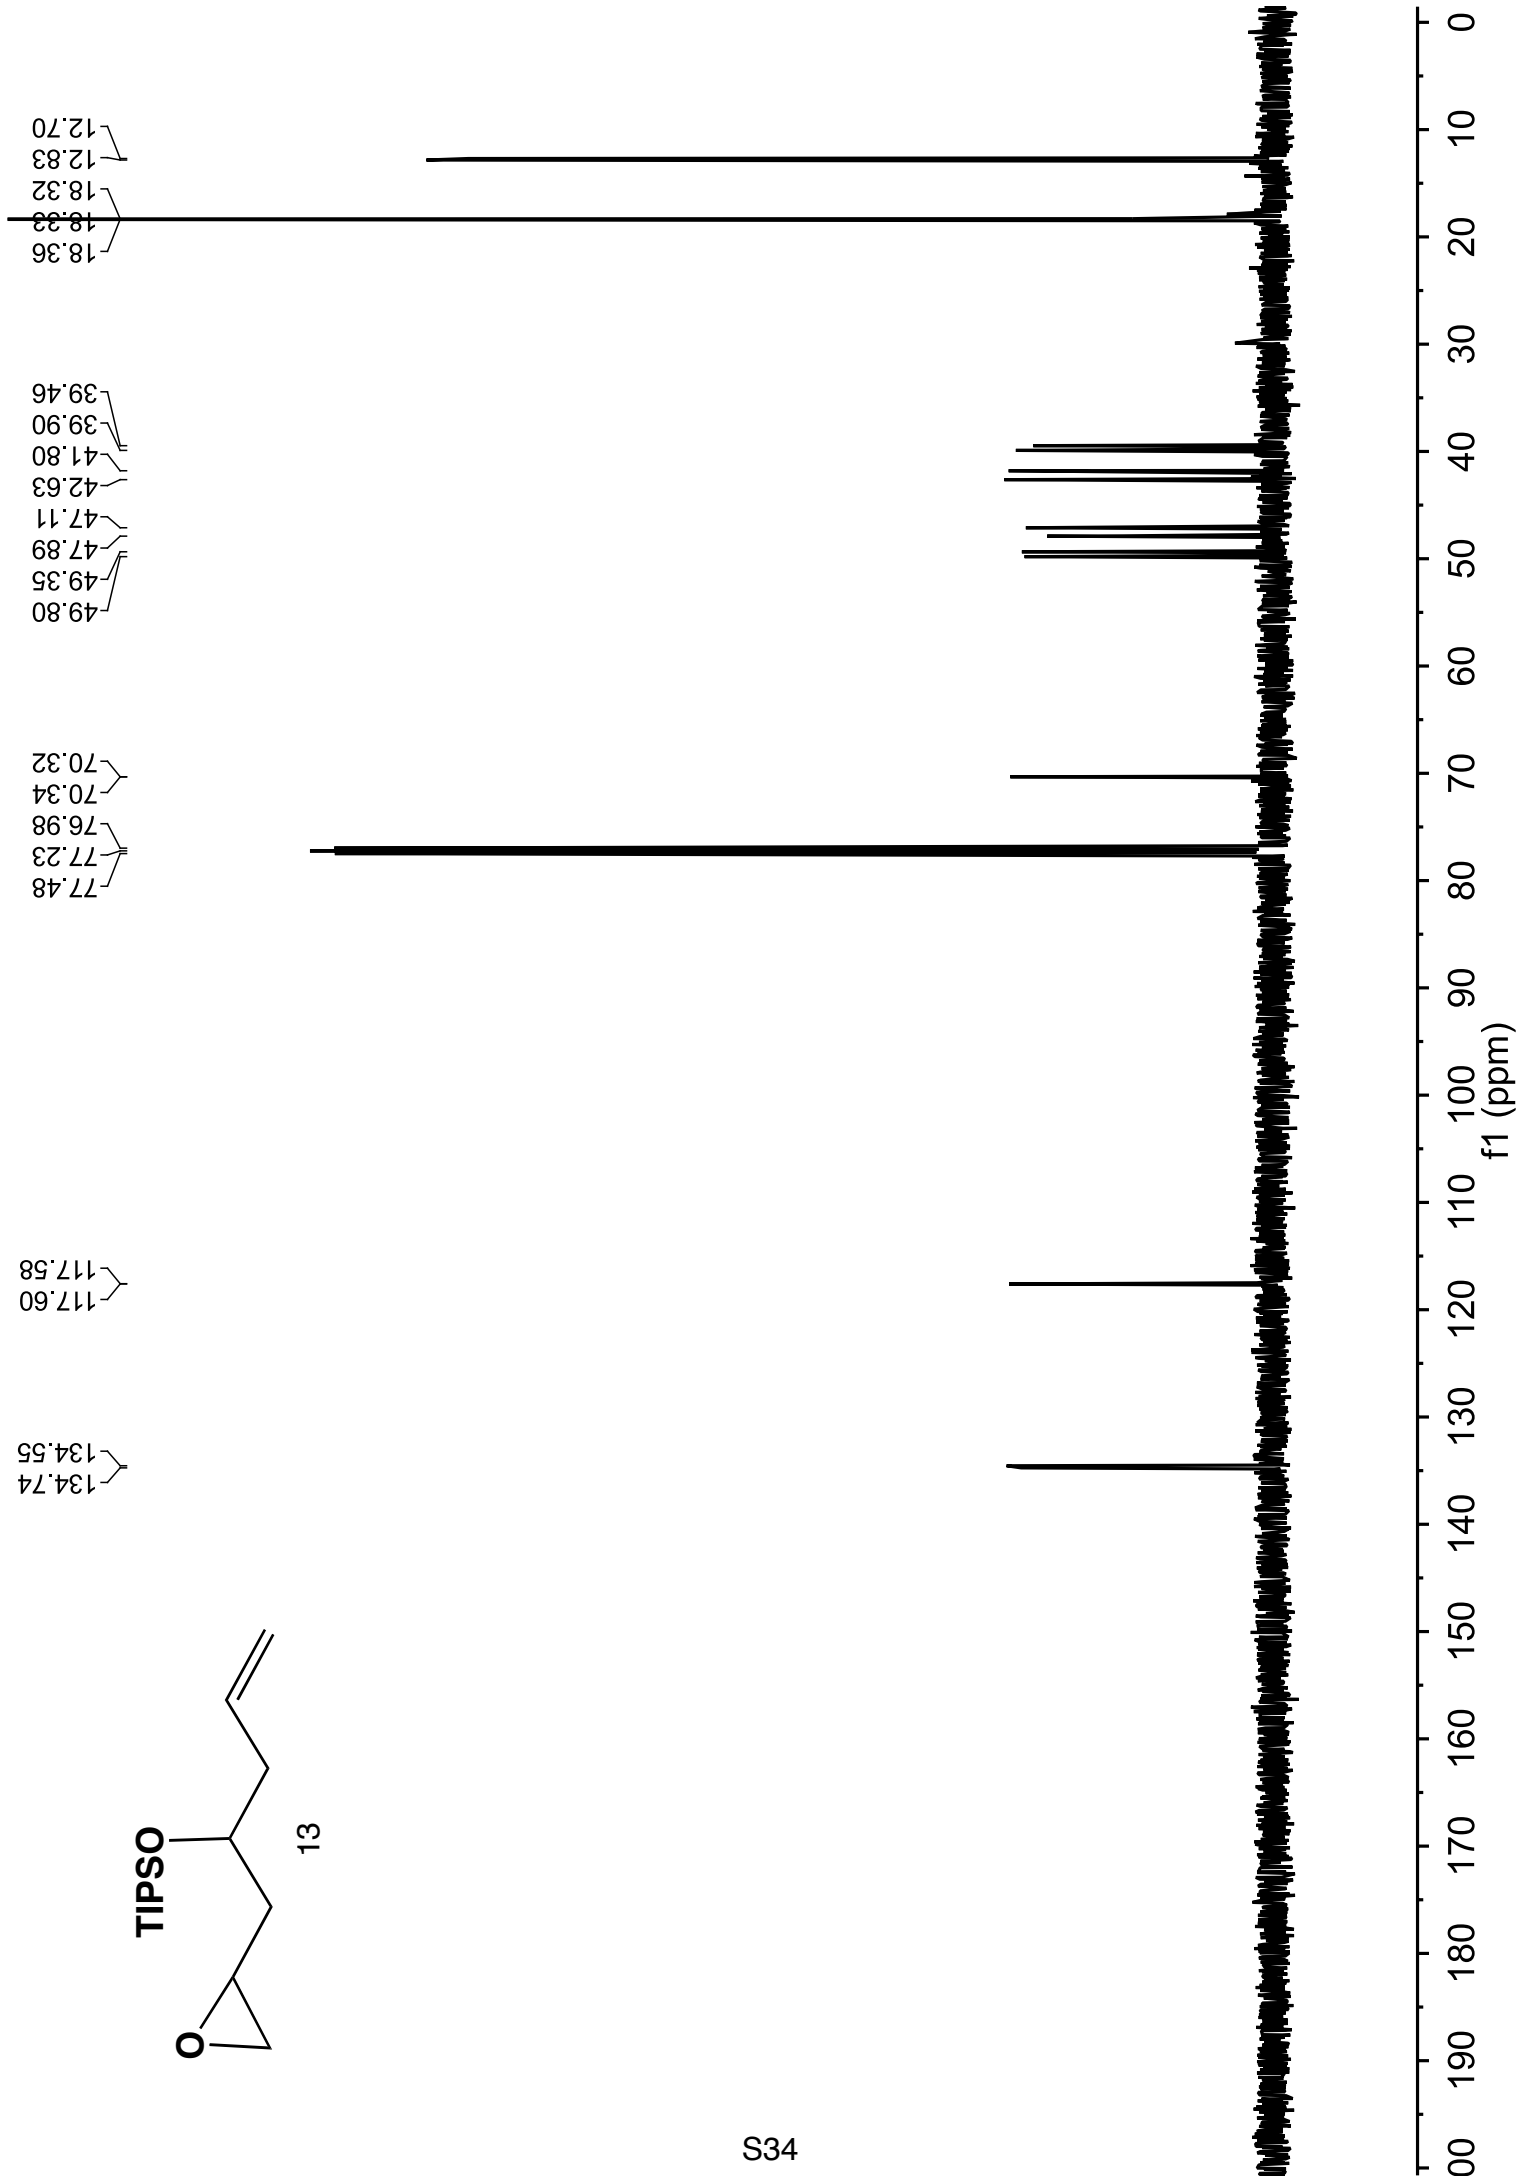

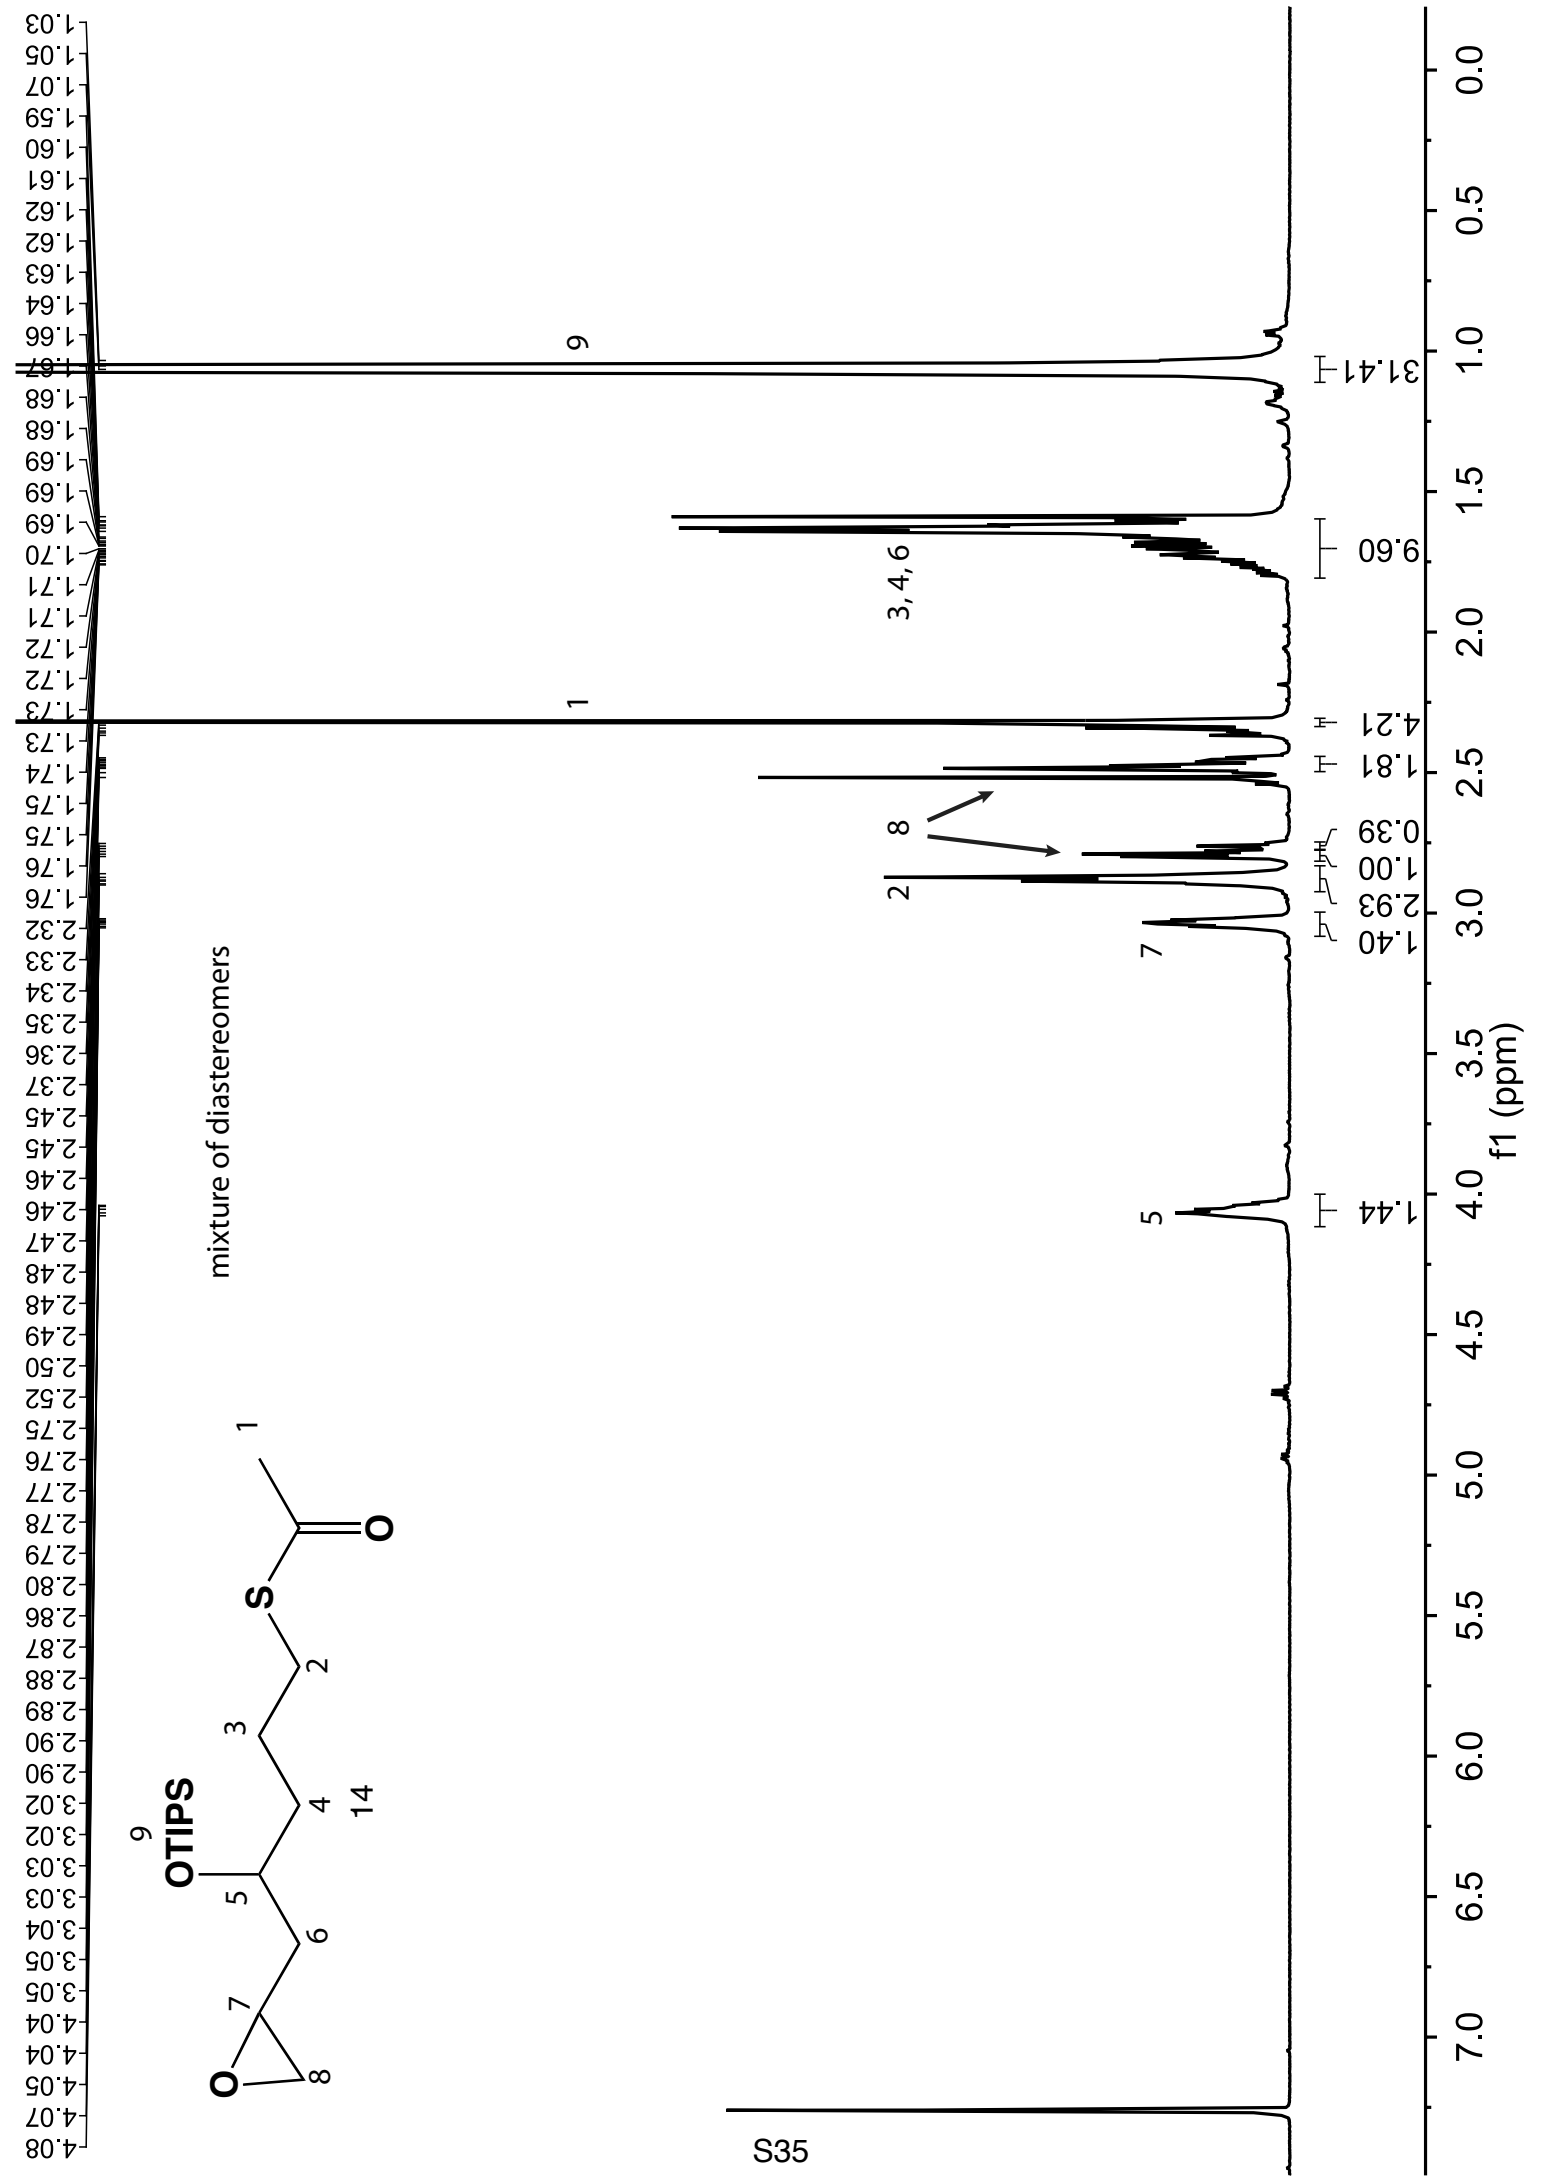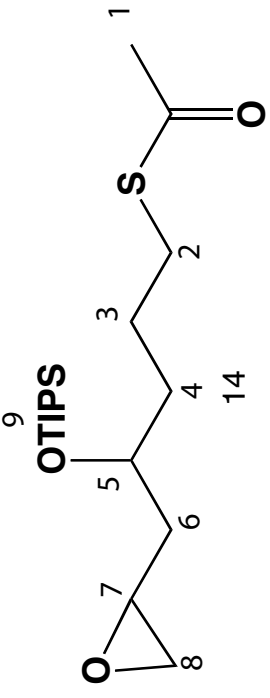

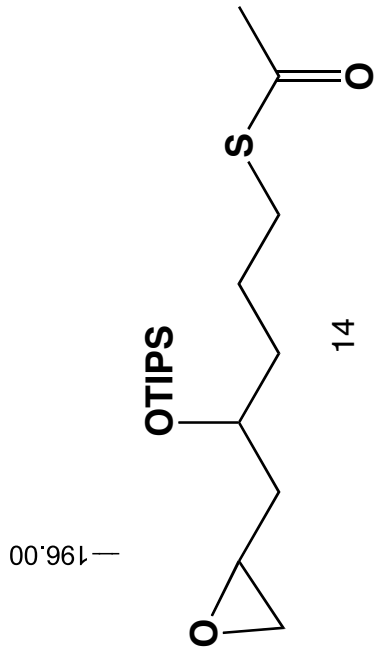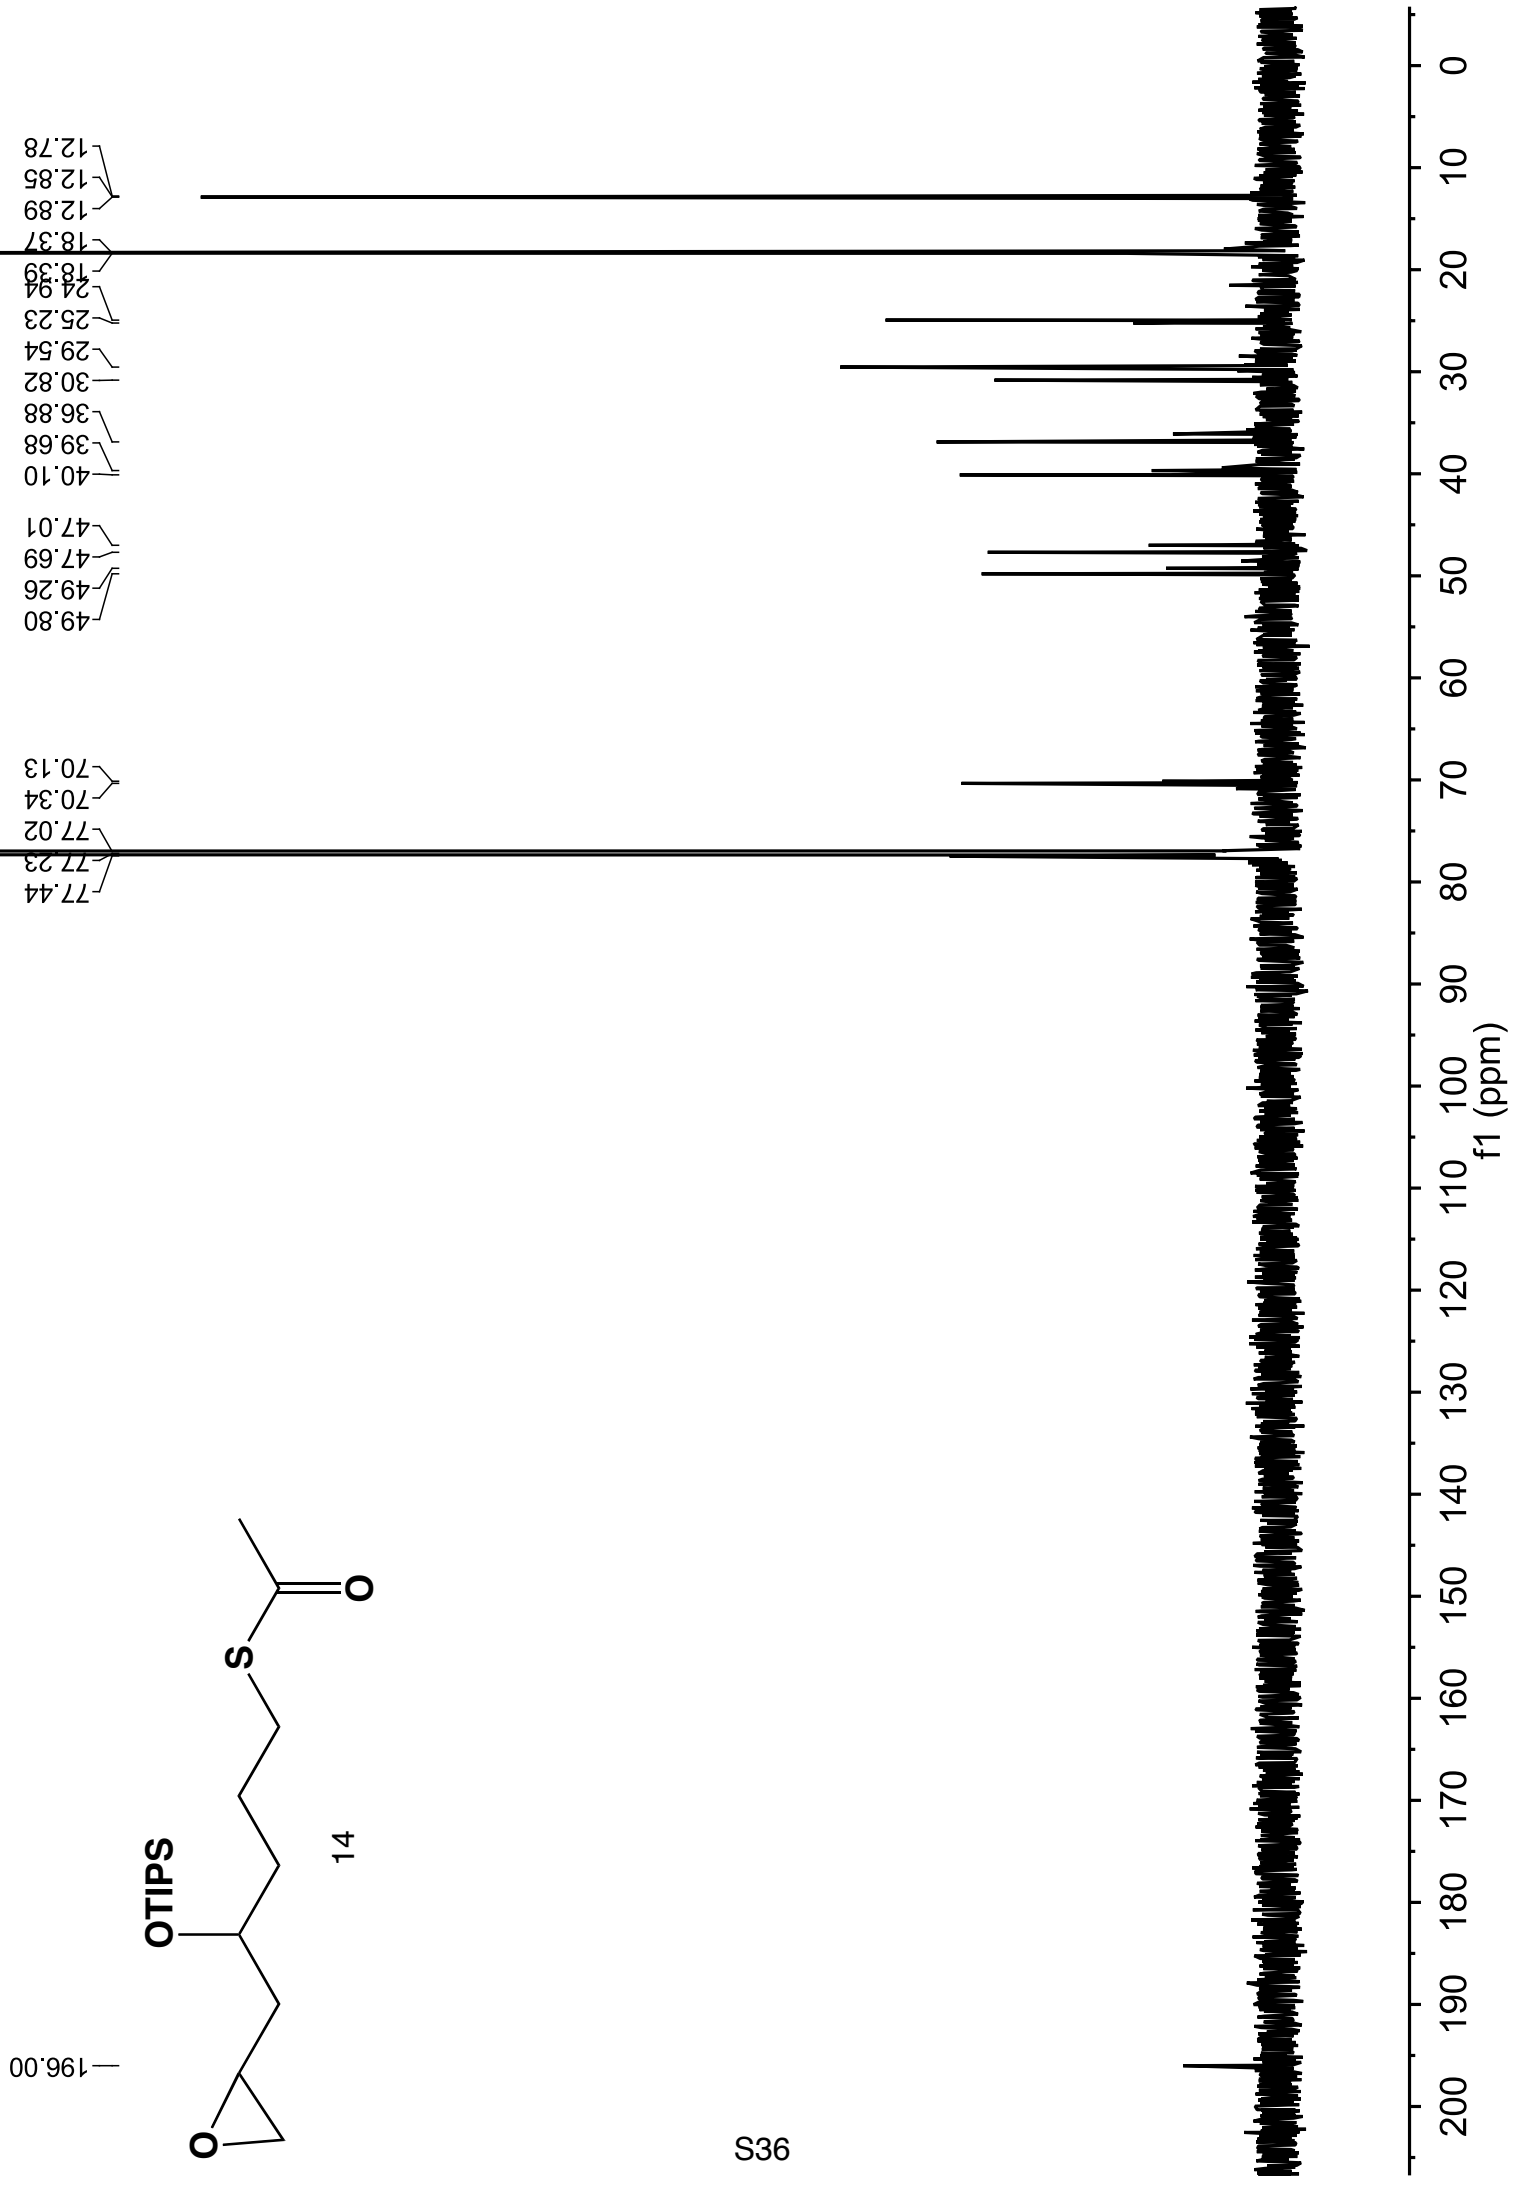



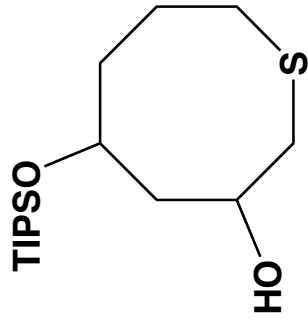

15  
diastereomers

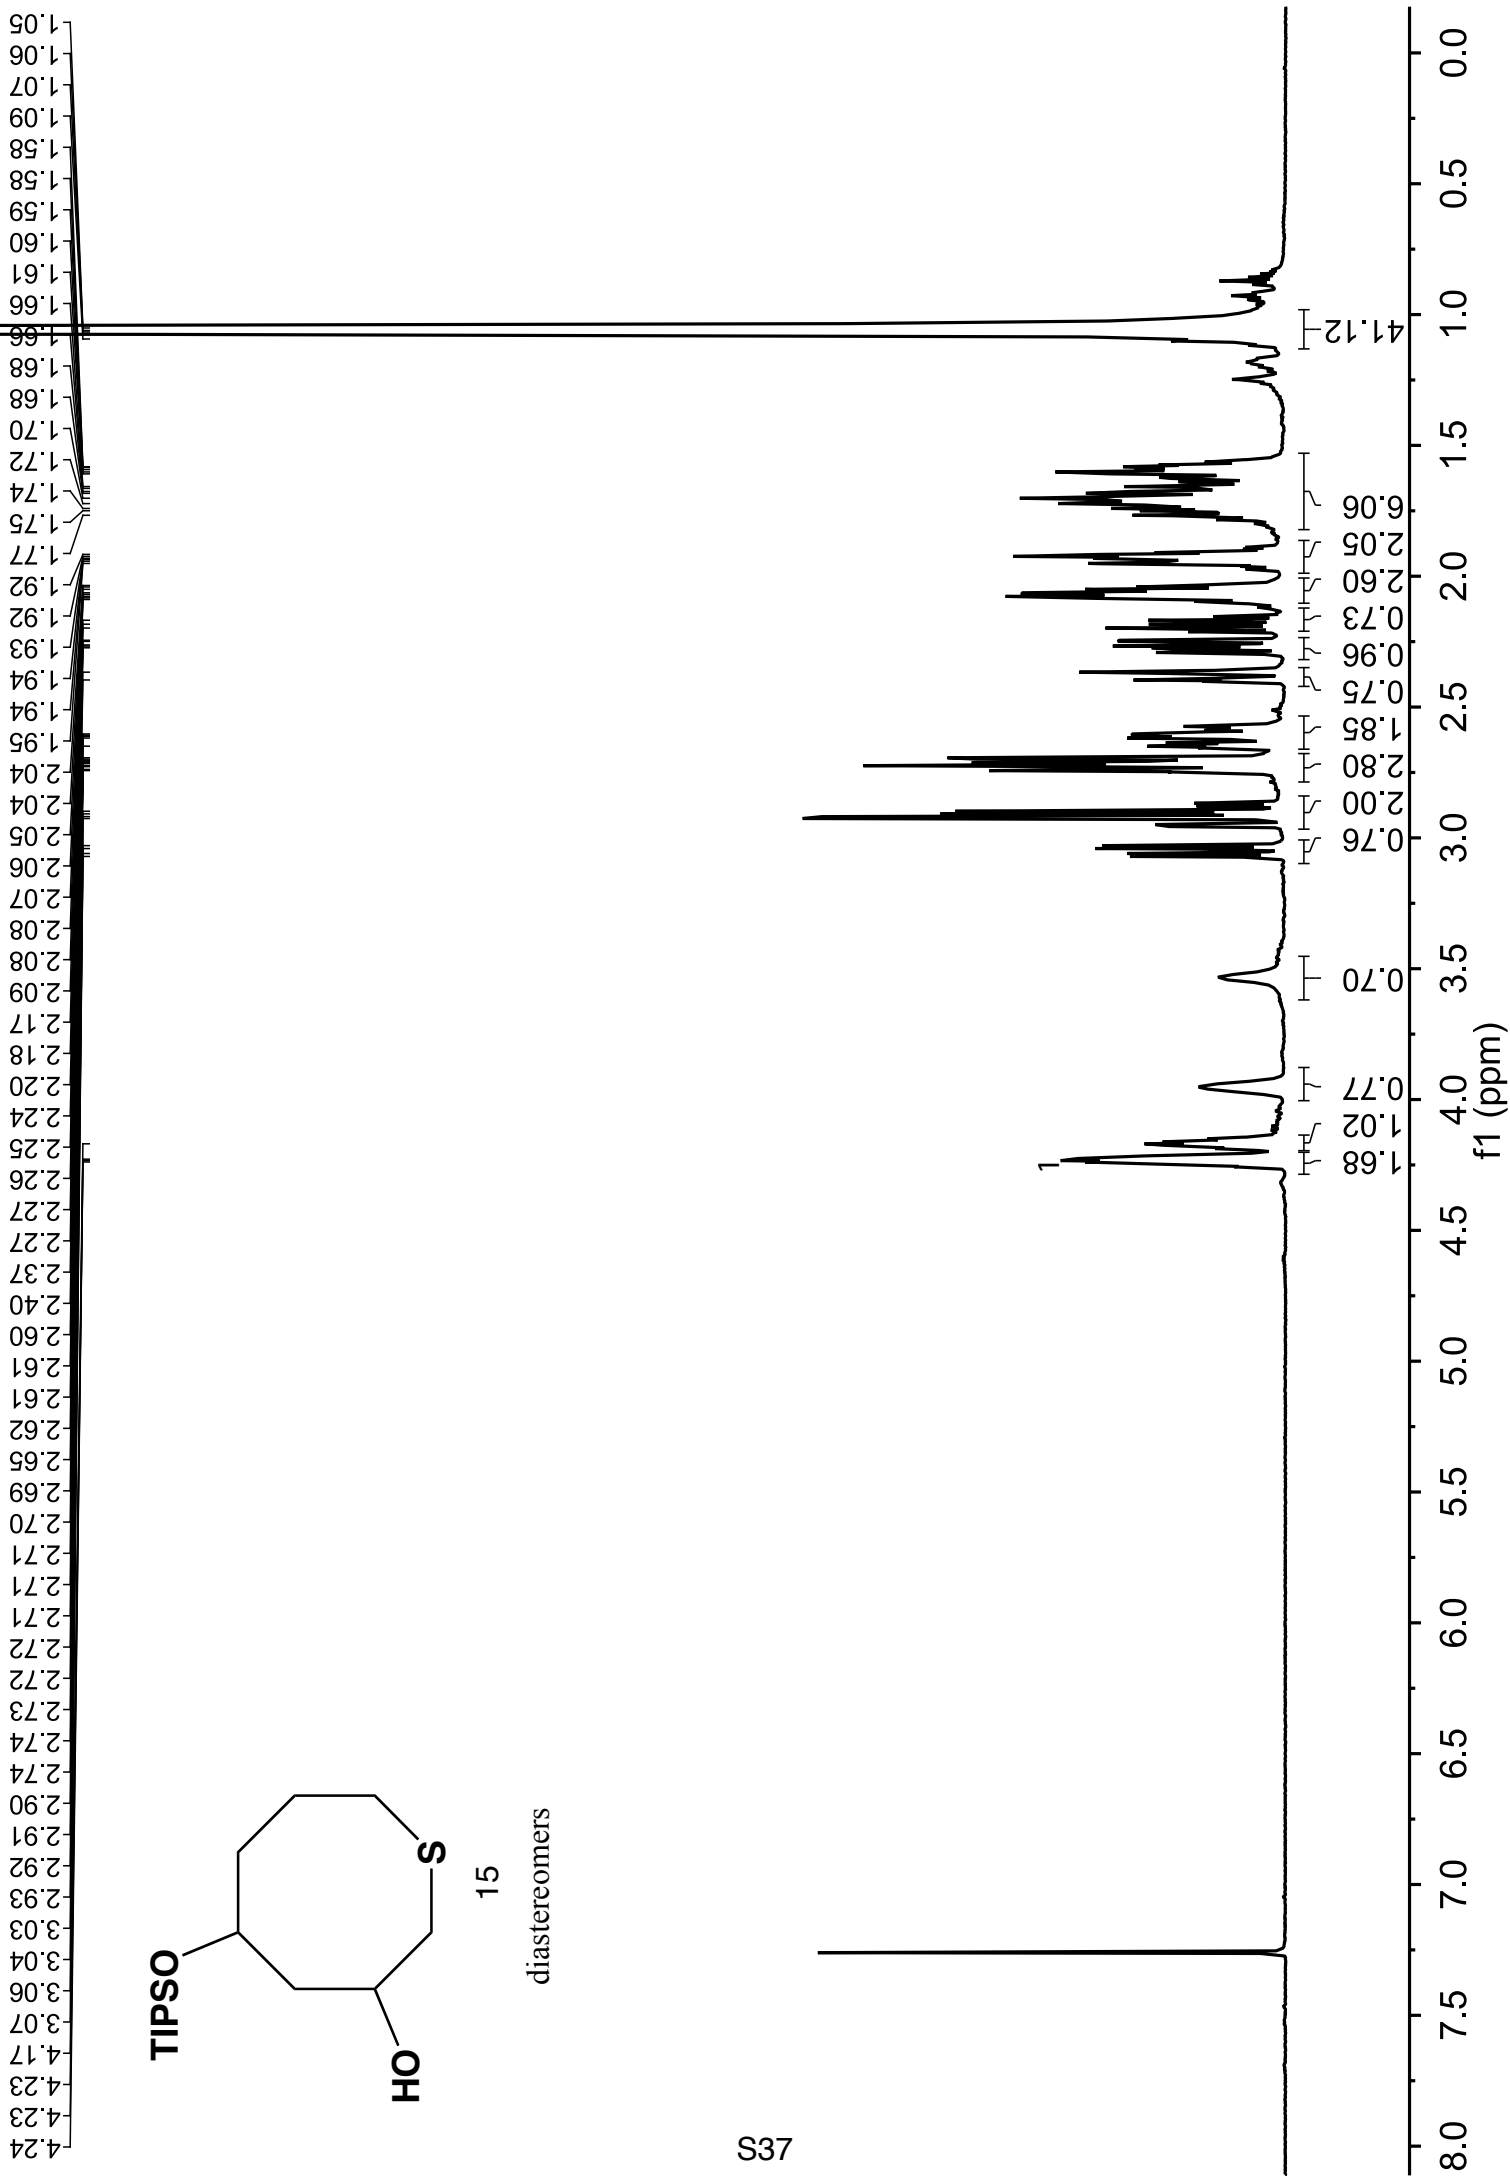

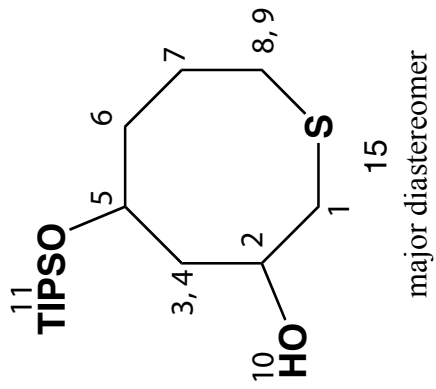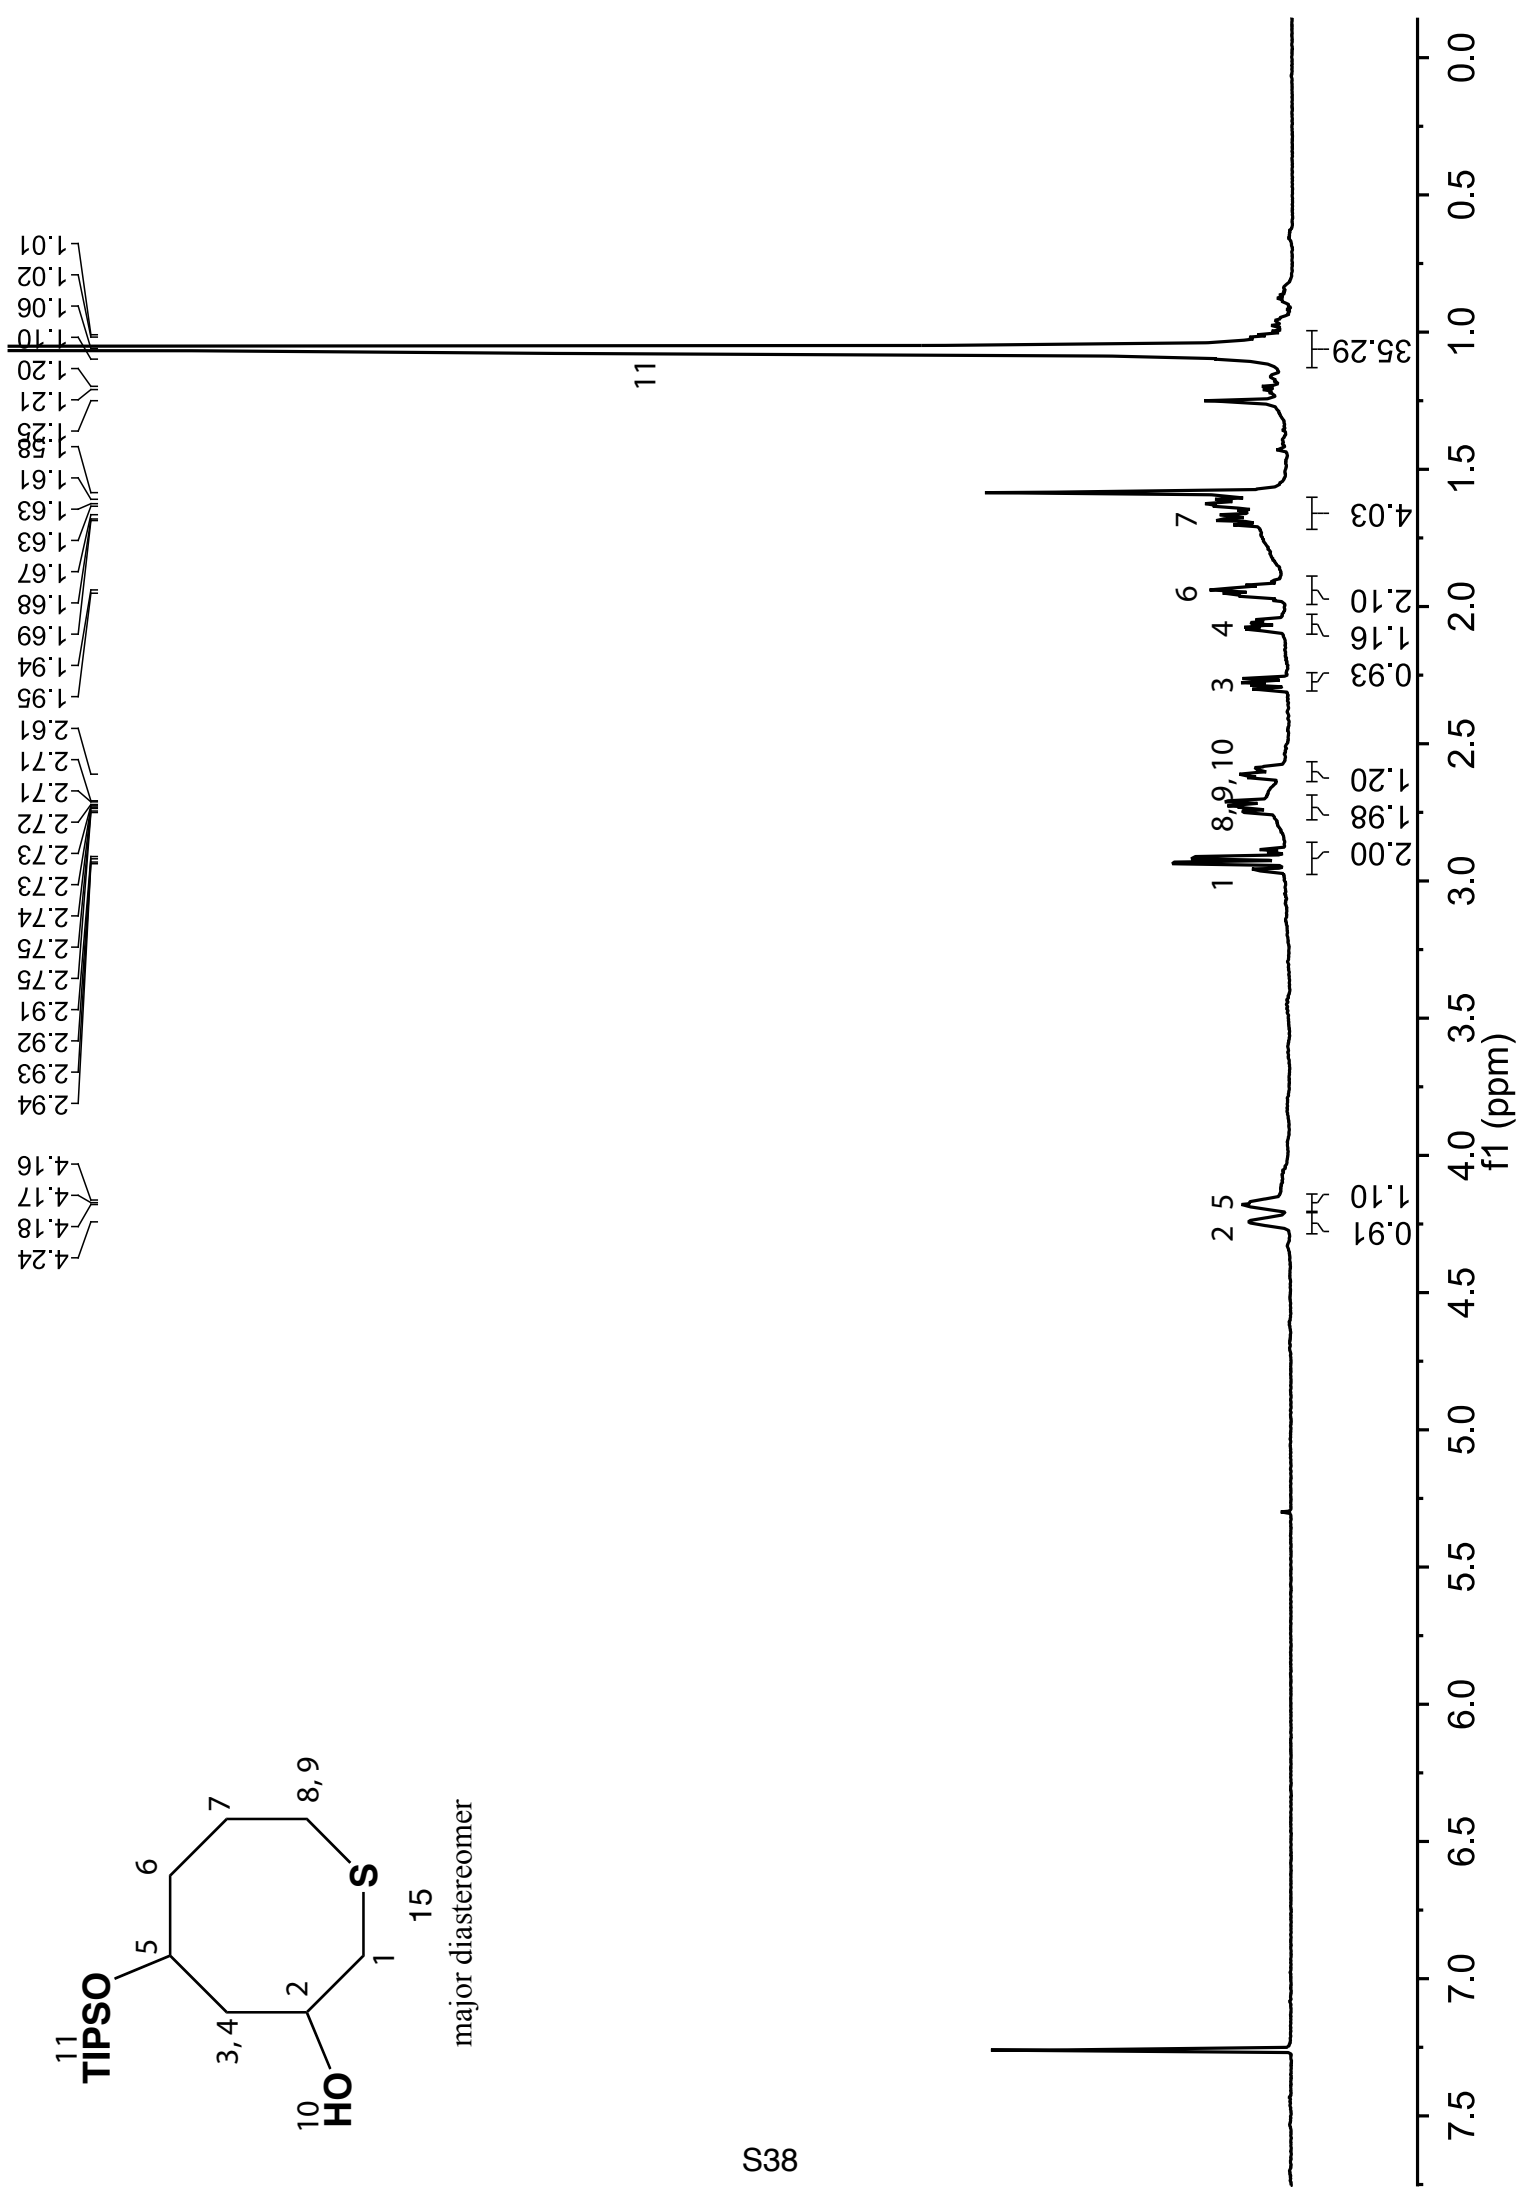

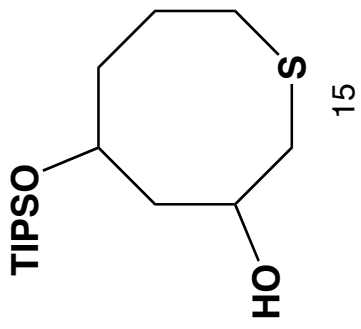

S39

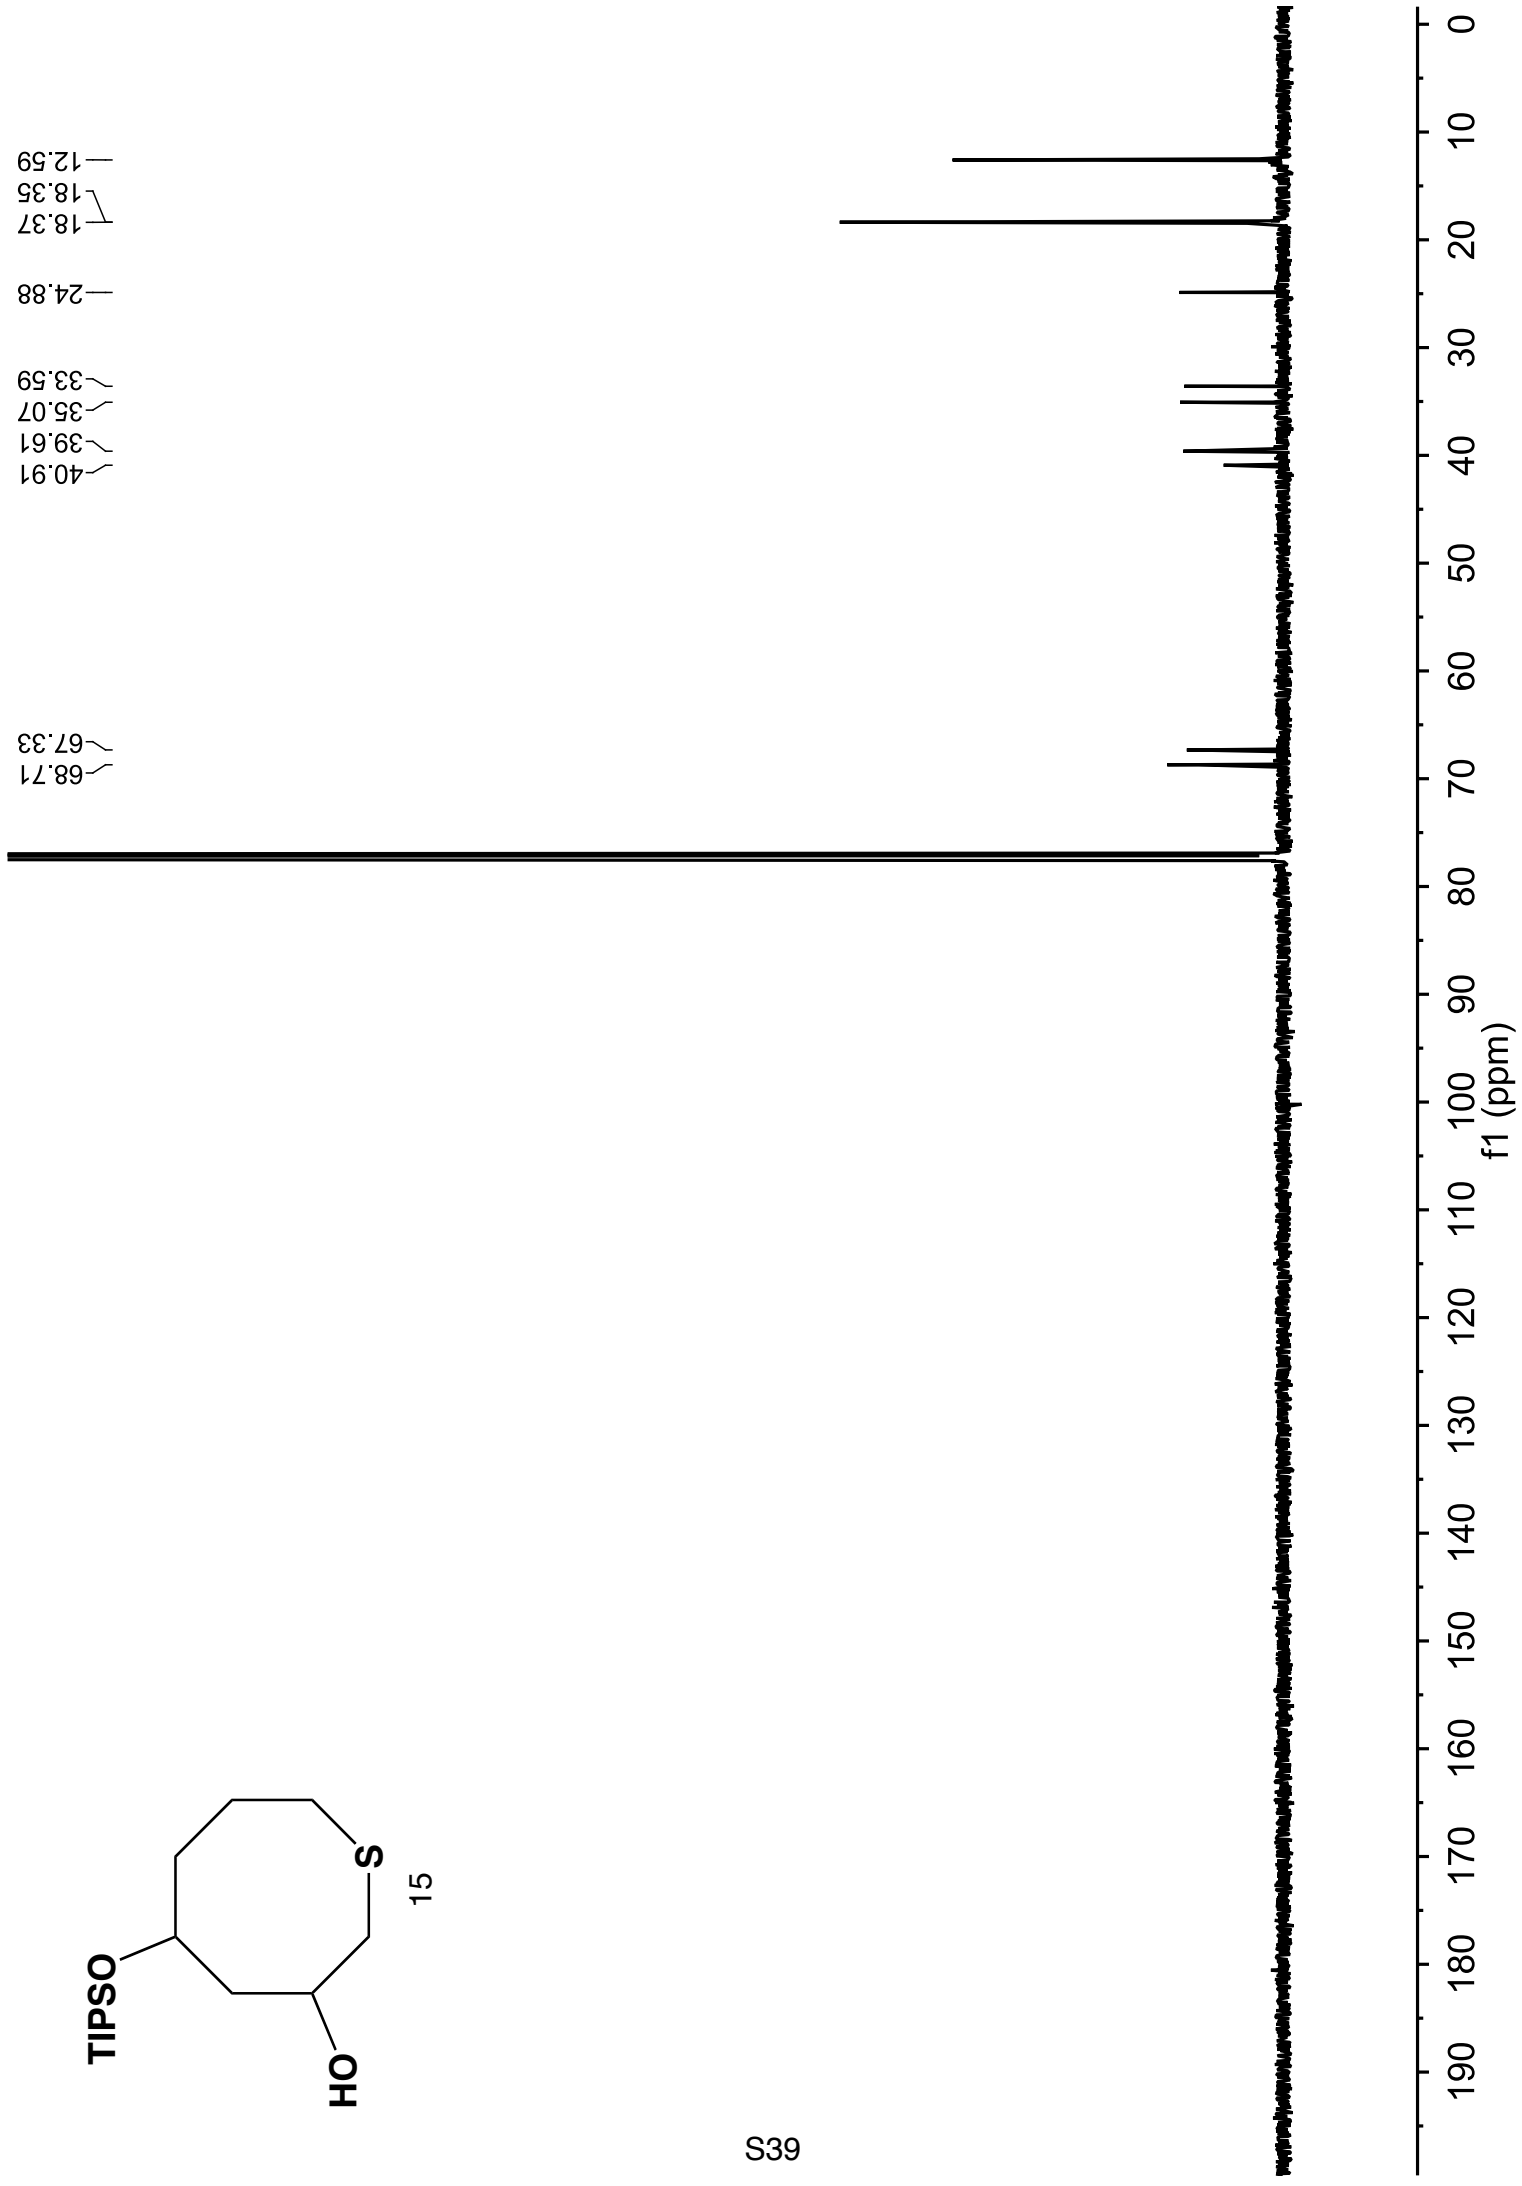

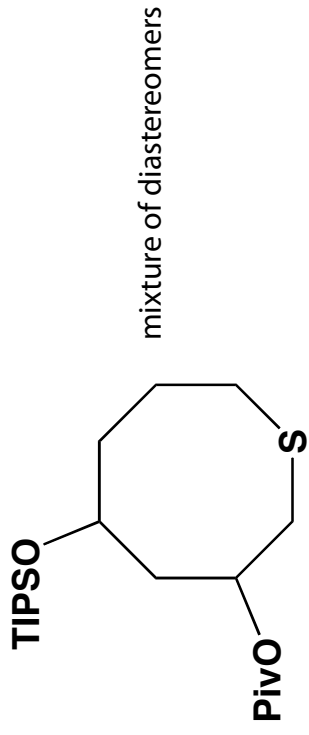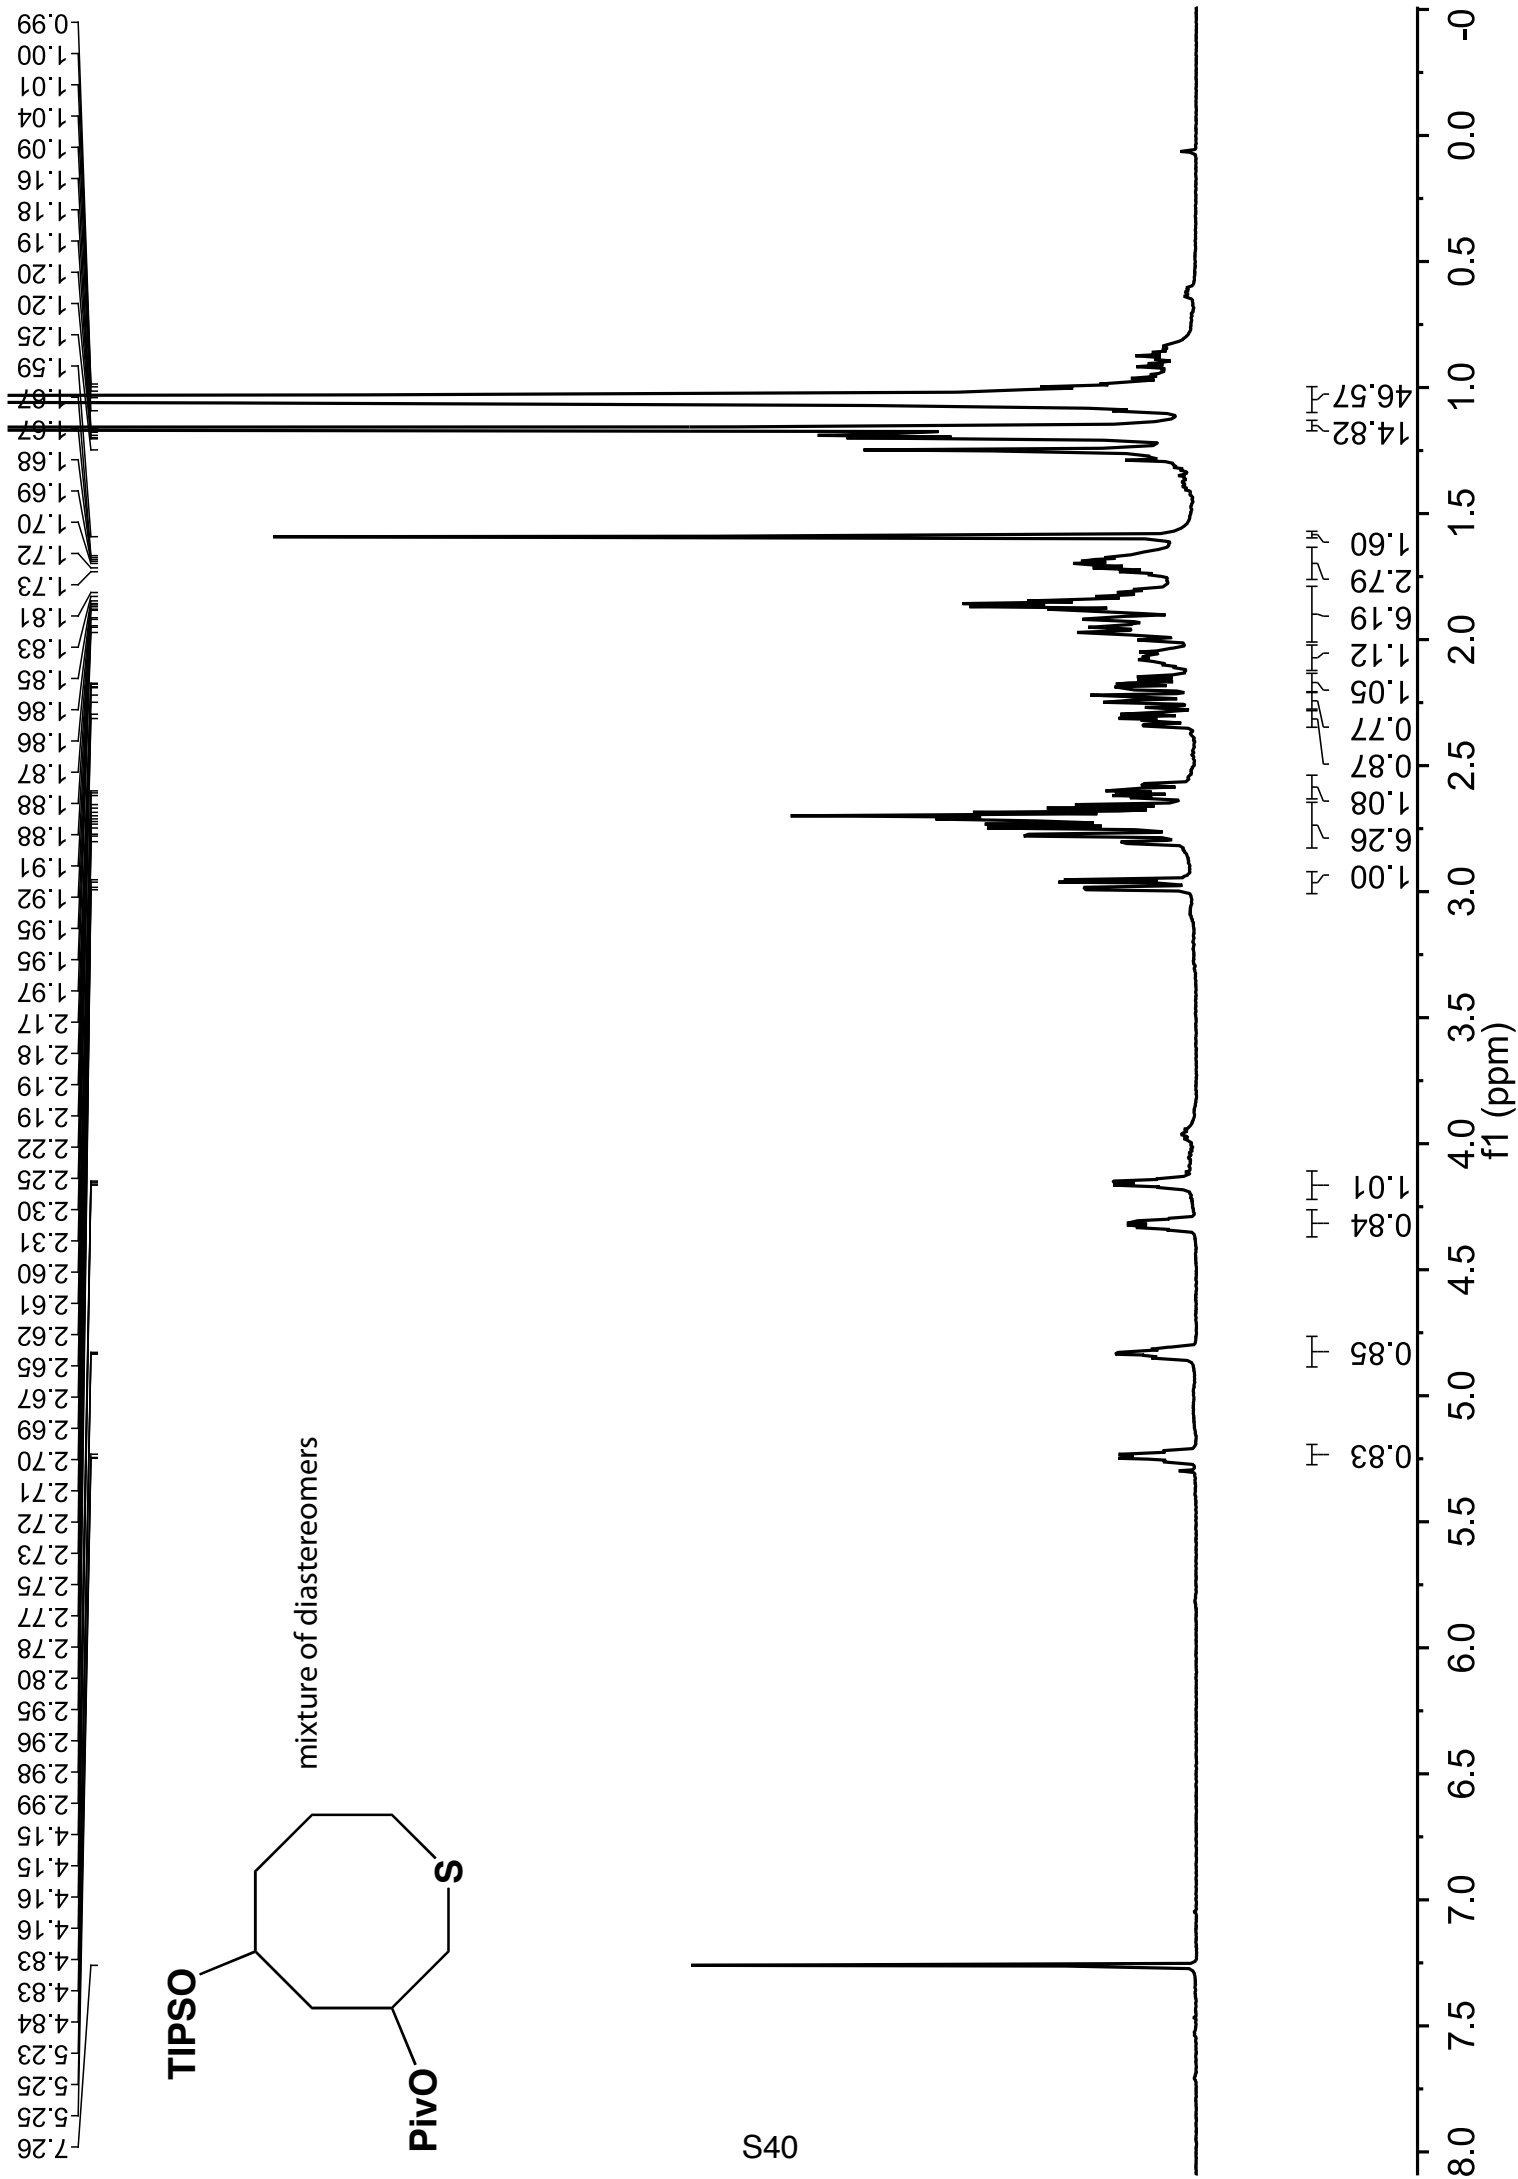

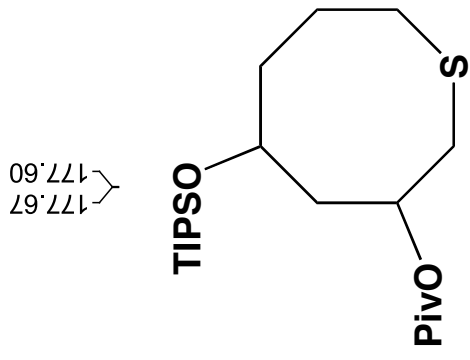

177.67  
177.60

77.48  
77.23  
76.98  
71.66  
70.29  
68.57  
68.45

41.74  
38.88  
38.81  
37.42  
36.78  
36.18  
34.37  
33.87  
33.67  
33.12  
27.31  
18.33  
18.31  
18.29  
18.28  
12.54  
12.50

S41

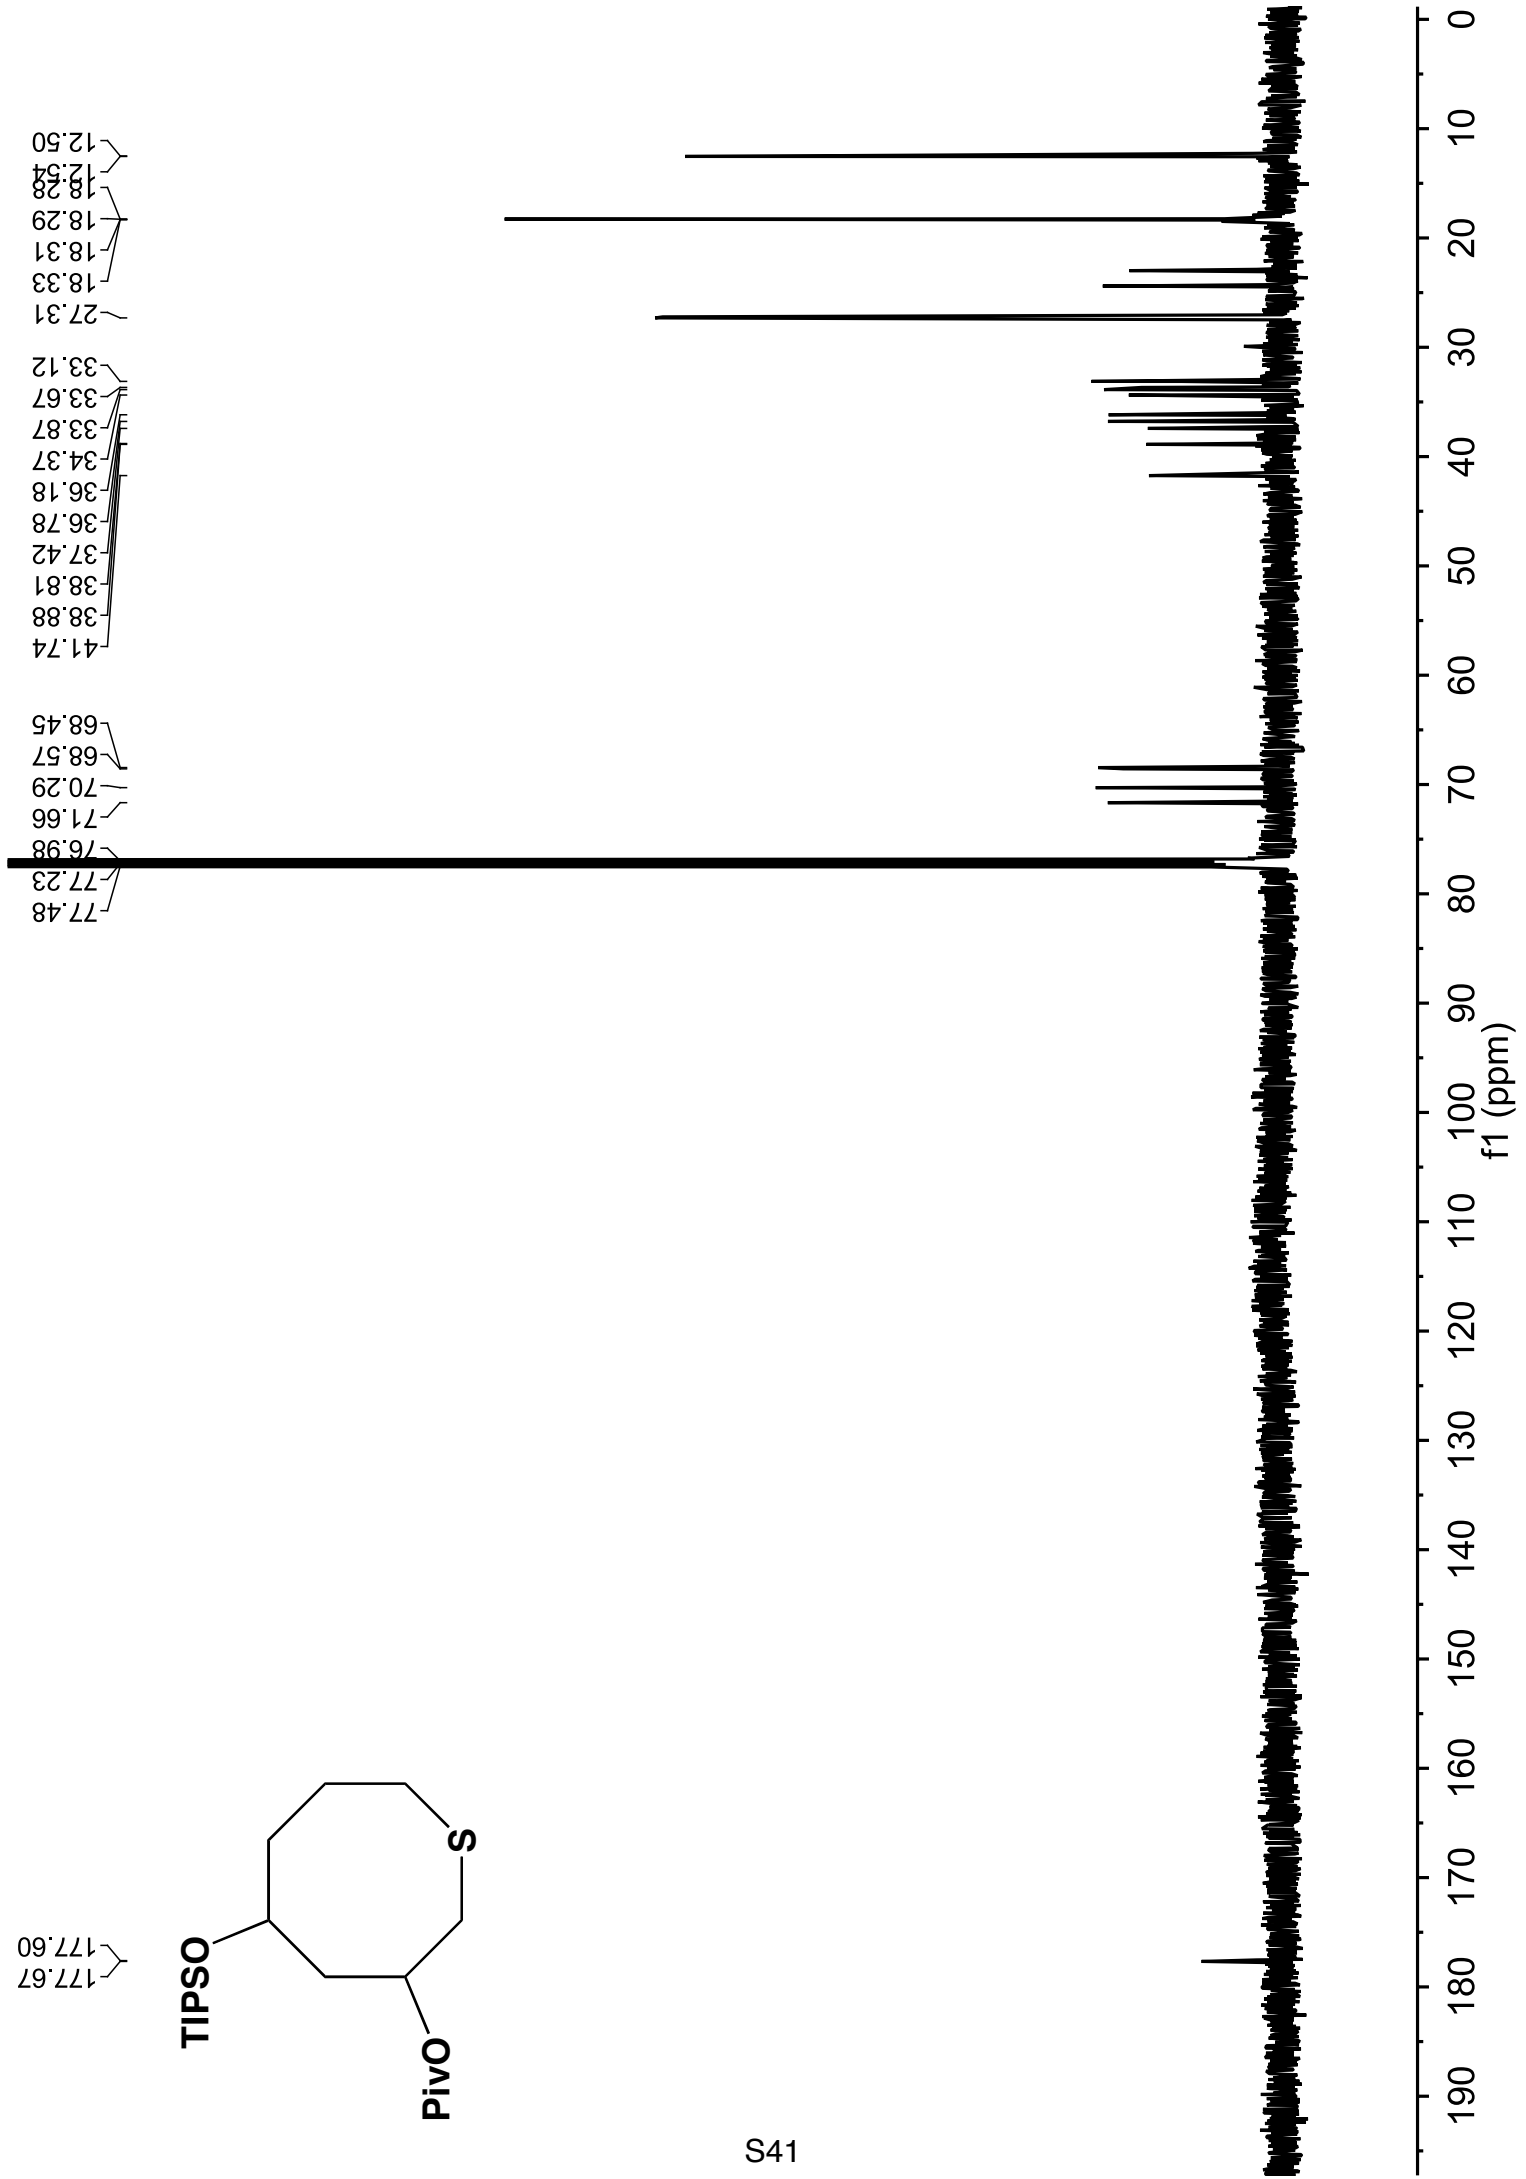

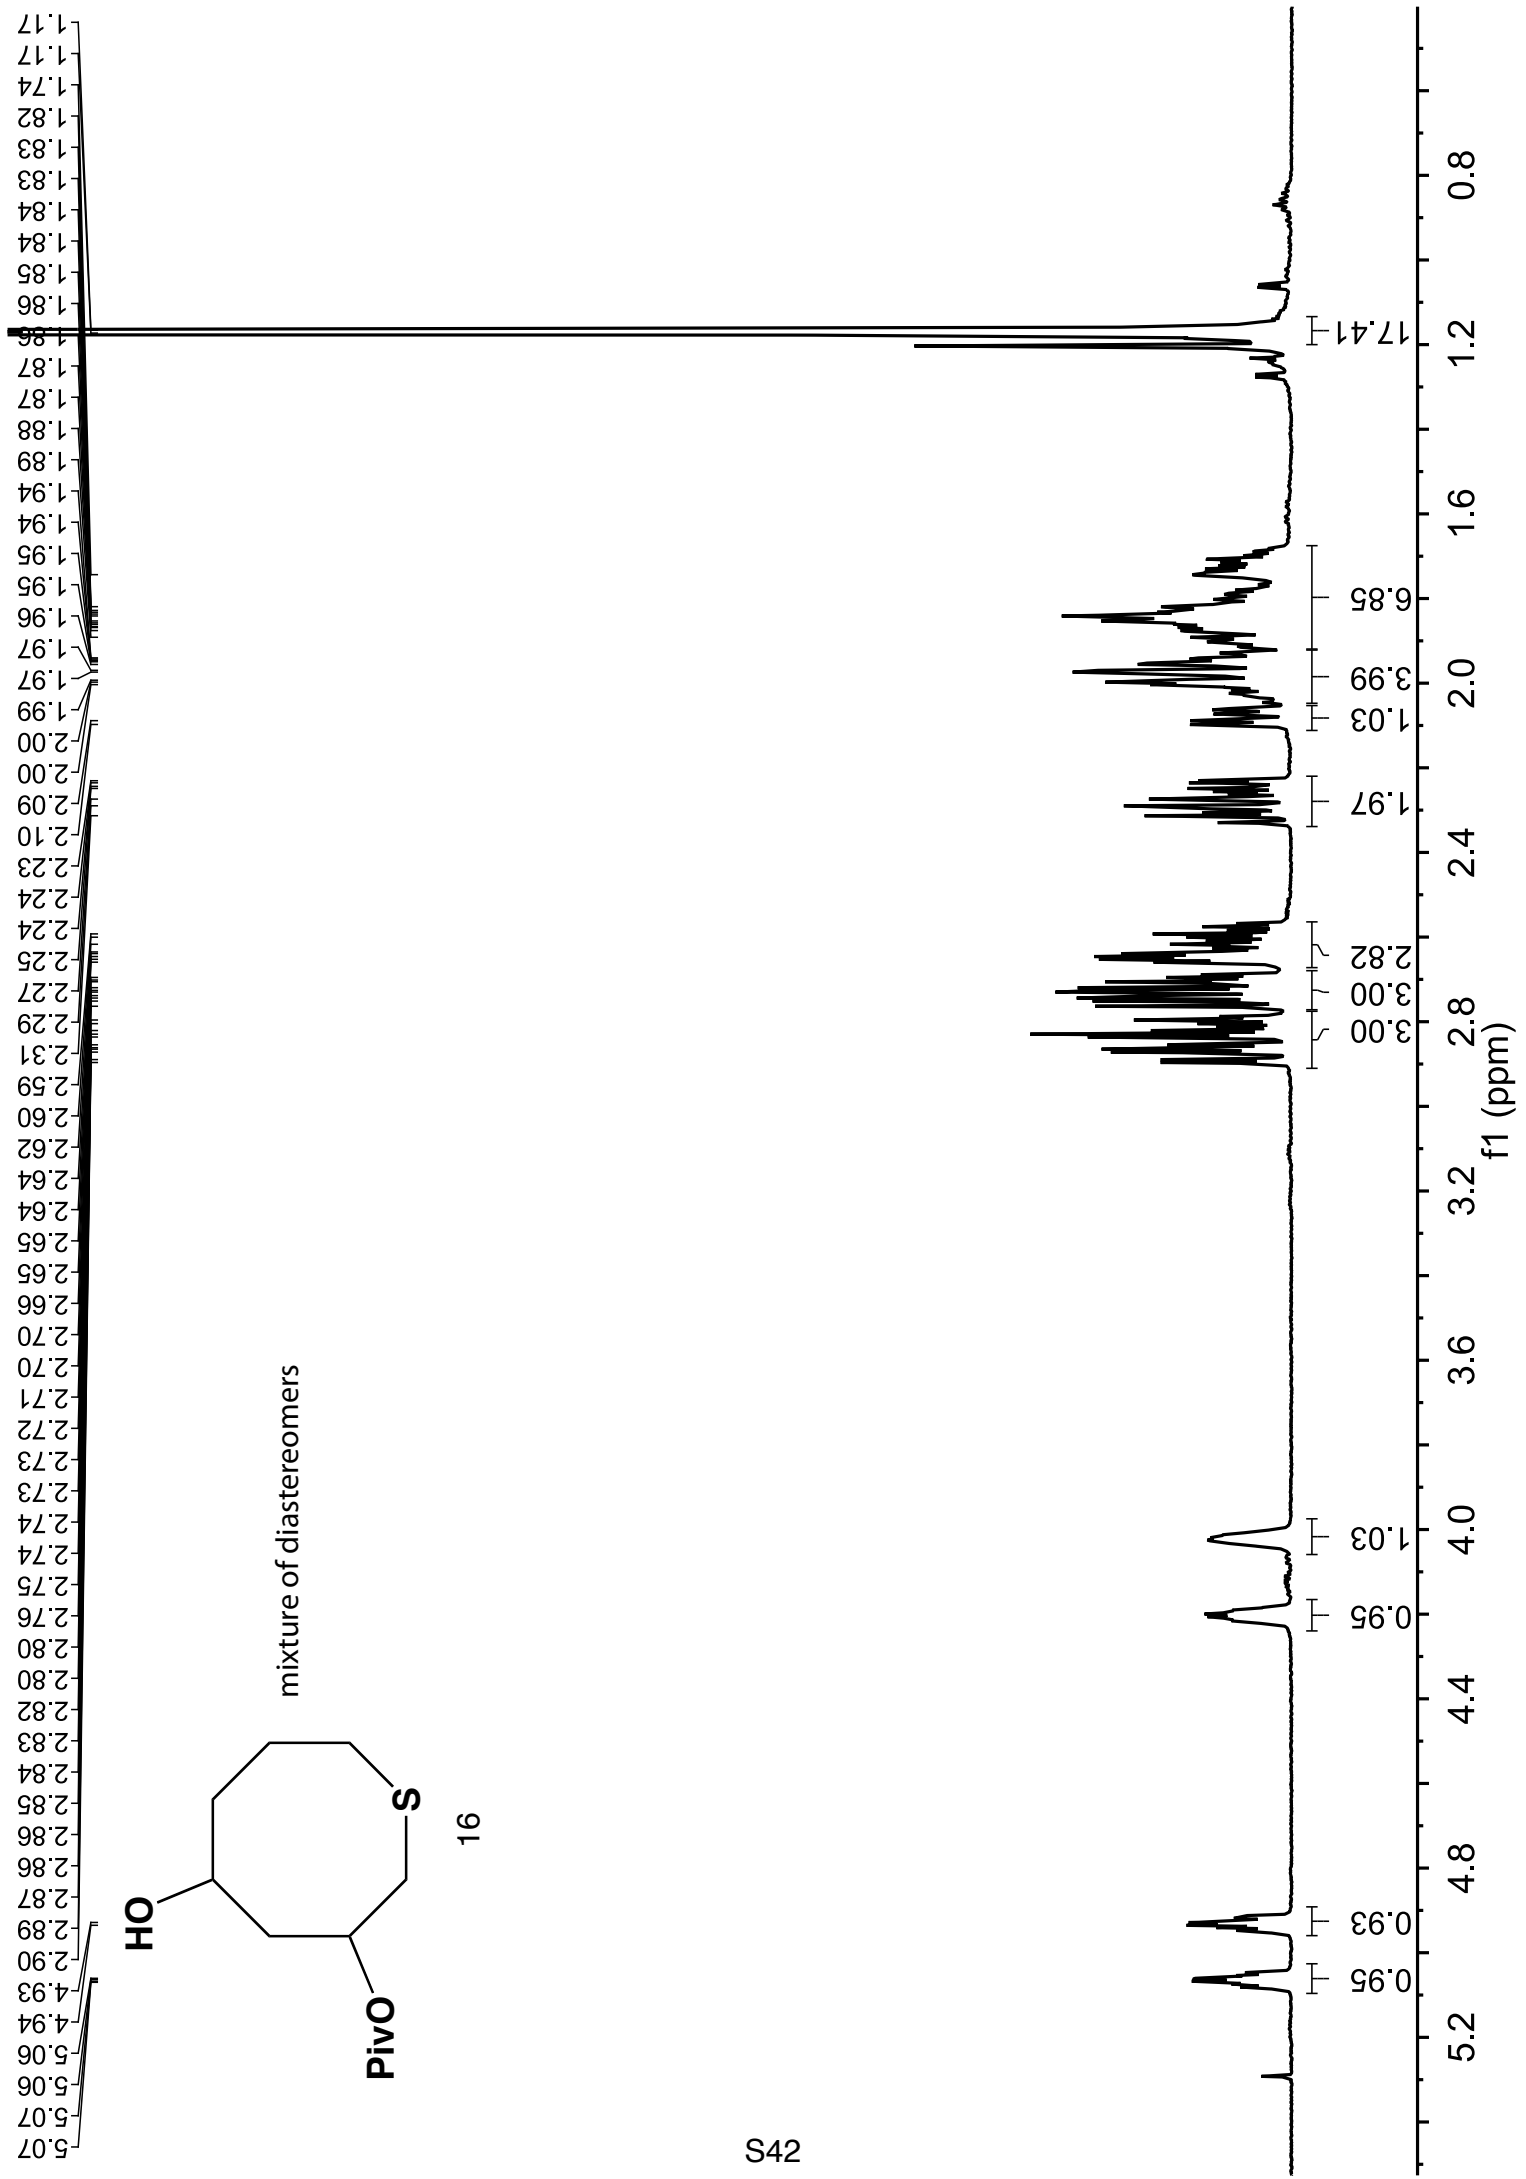

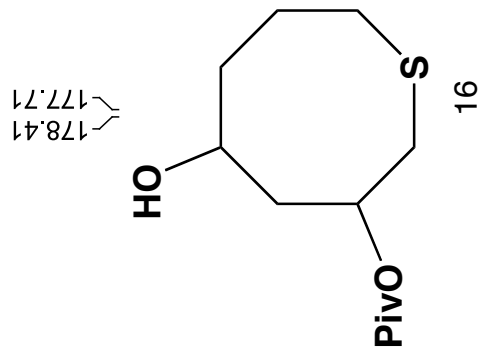

178.41  
177.71

77.44  
77.23  
77.02  
71.74  
70.76  
68.33  
68.20

39.43  
39.28  
38.96  
38.84  
36.35  
36.21  
34.13  
33.36  
32.93  
32.87  
27.38  
27.24  
27.22  
24.34  
23.82

S43

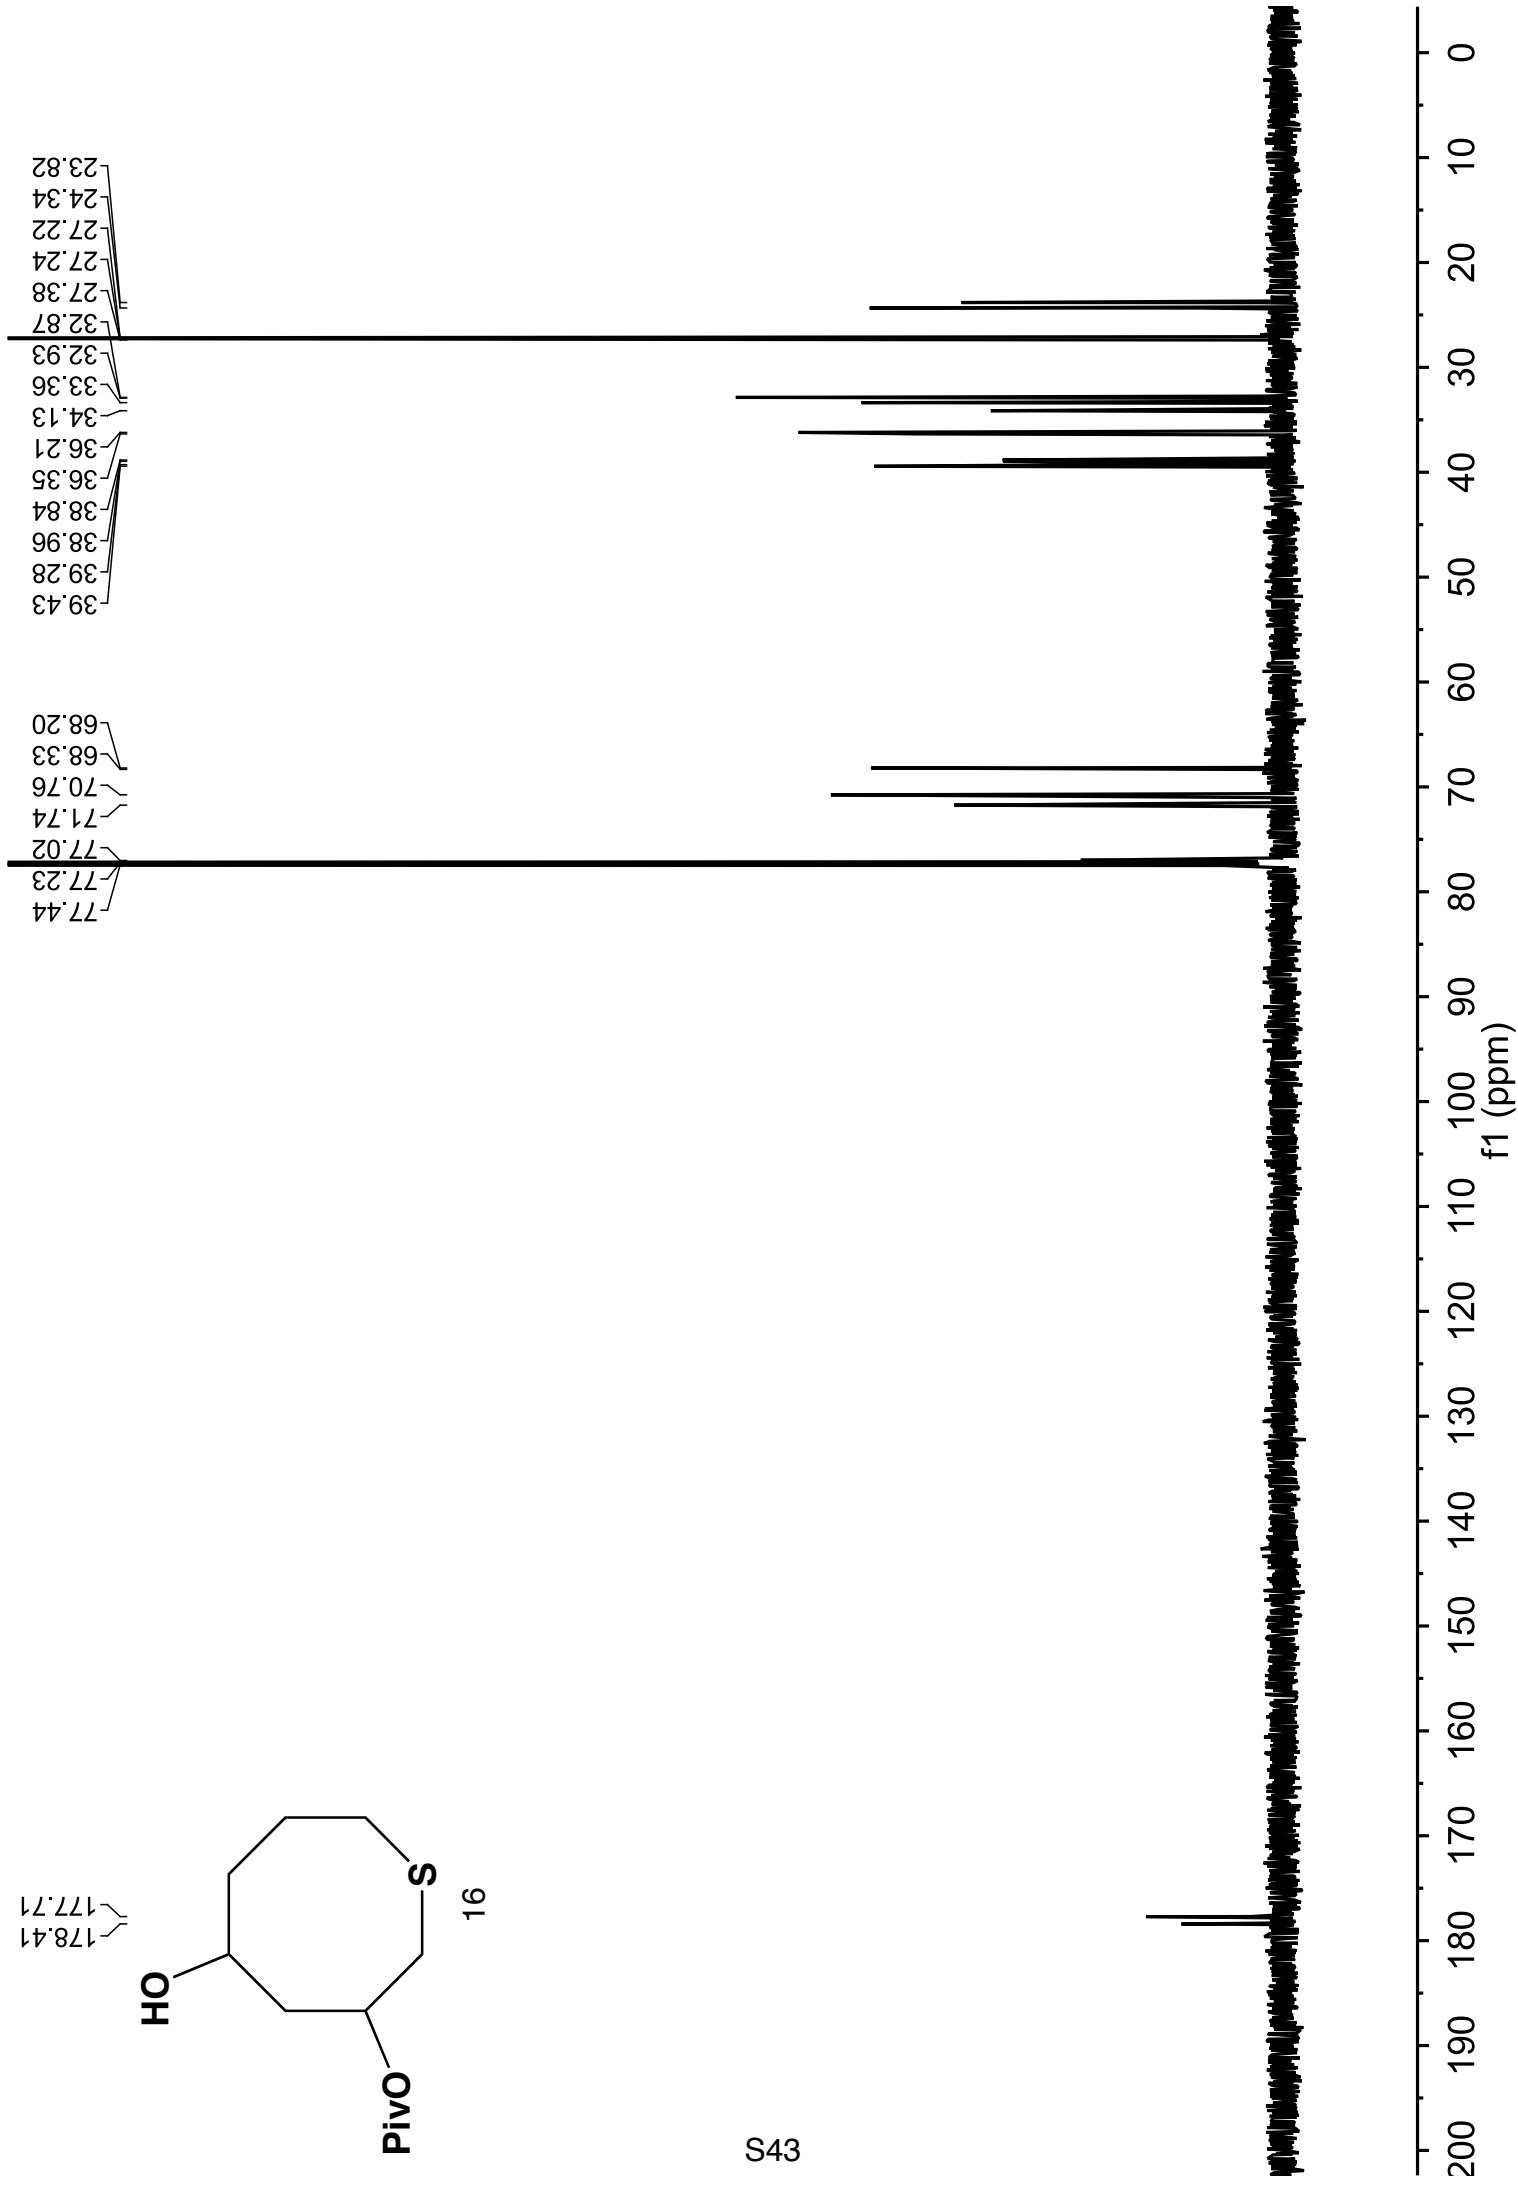

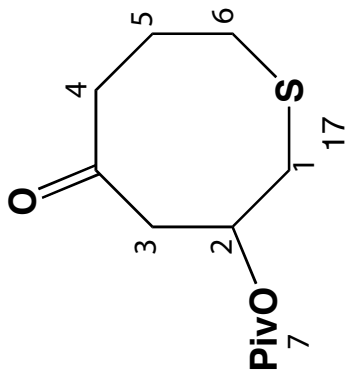

S44

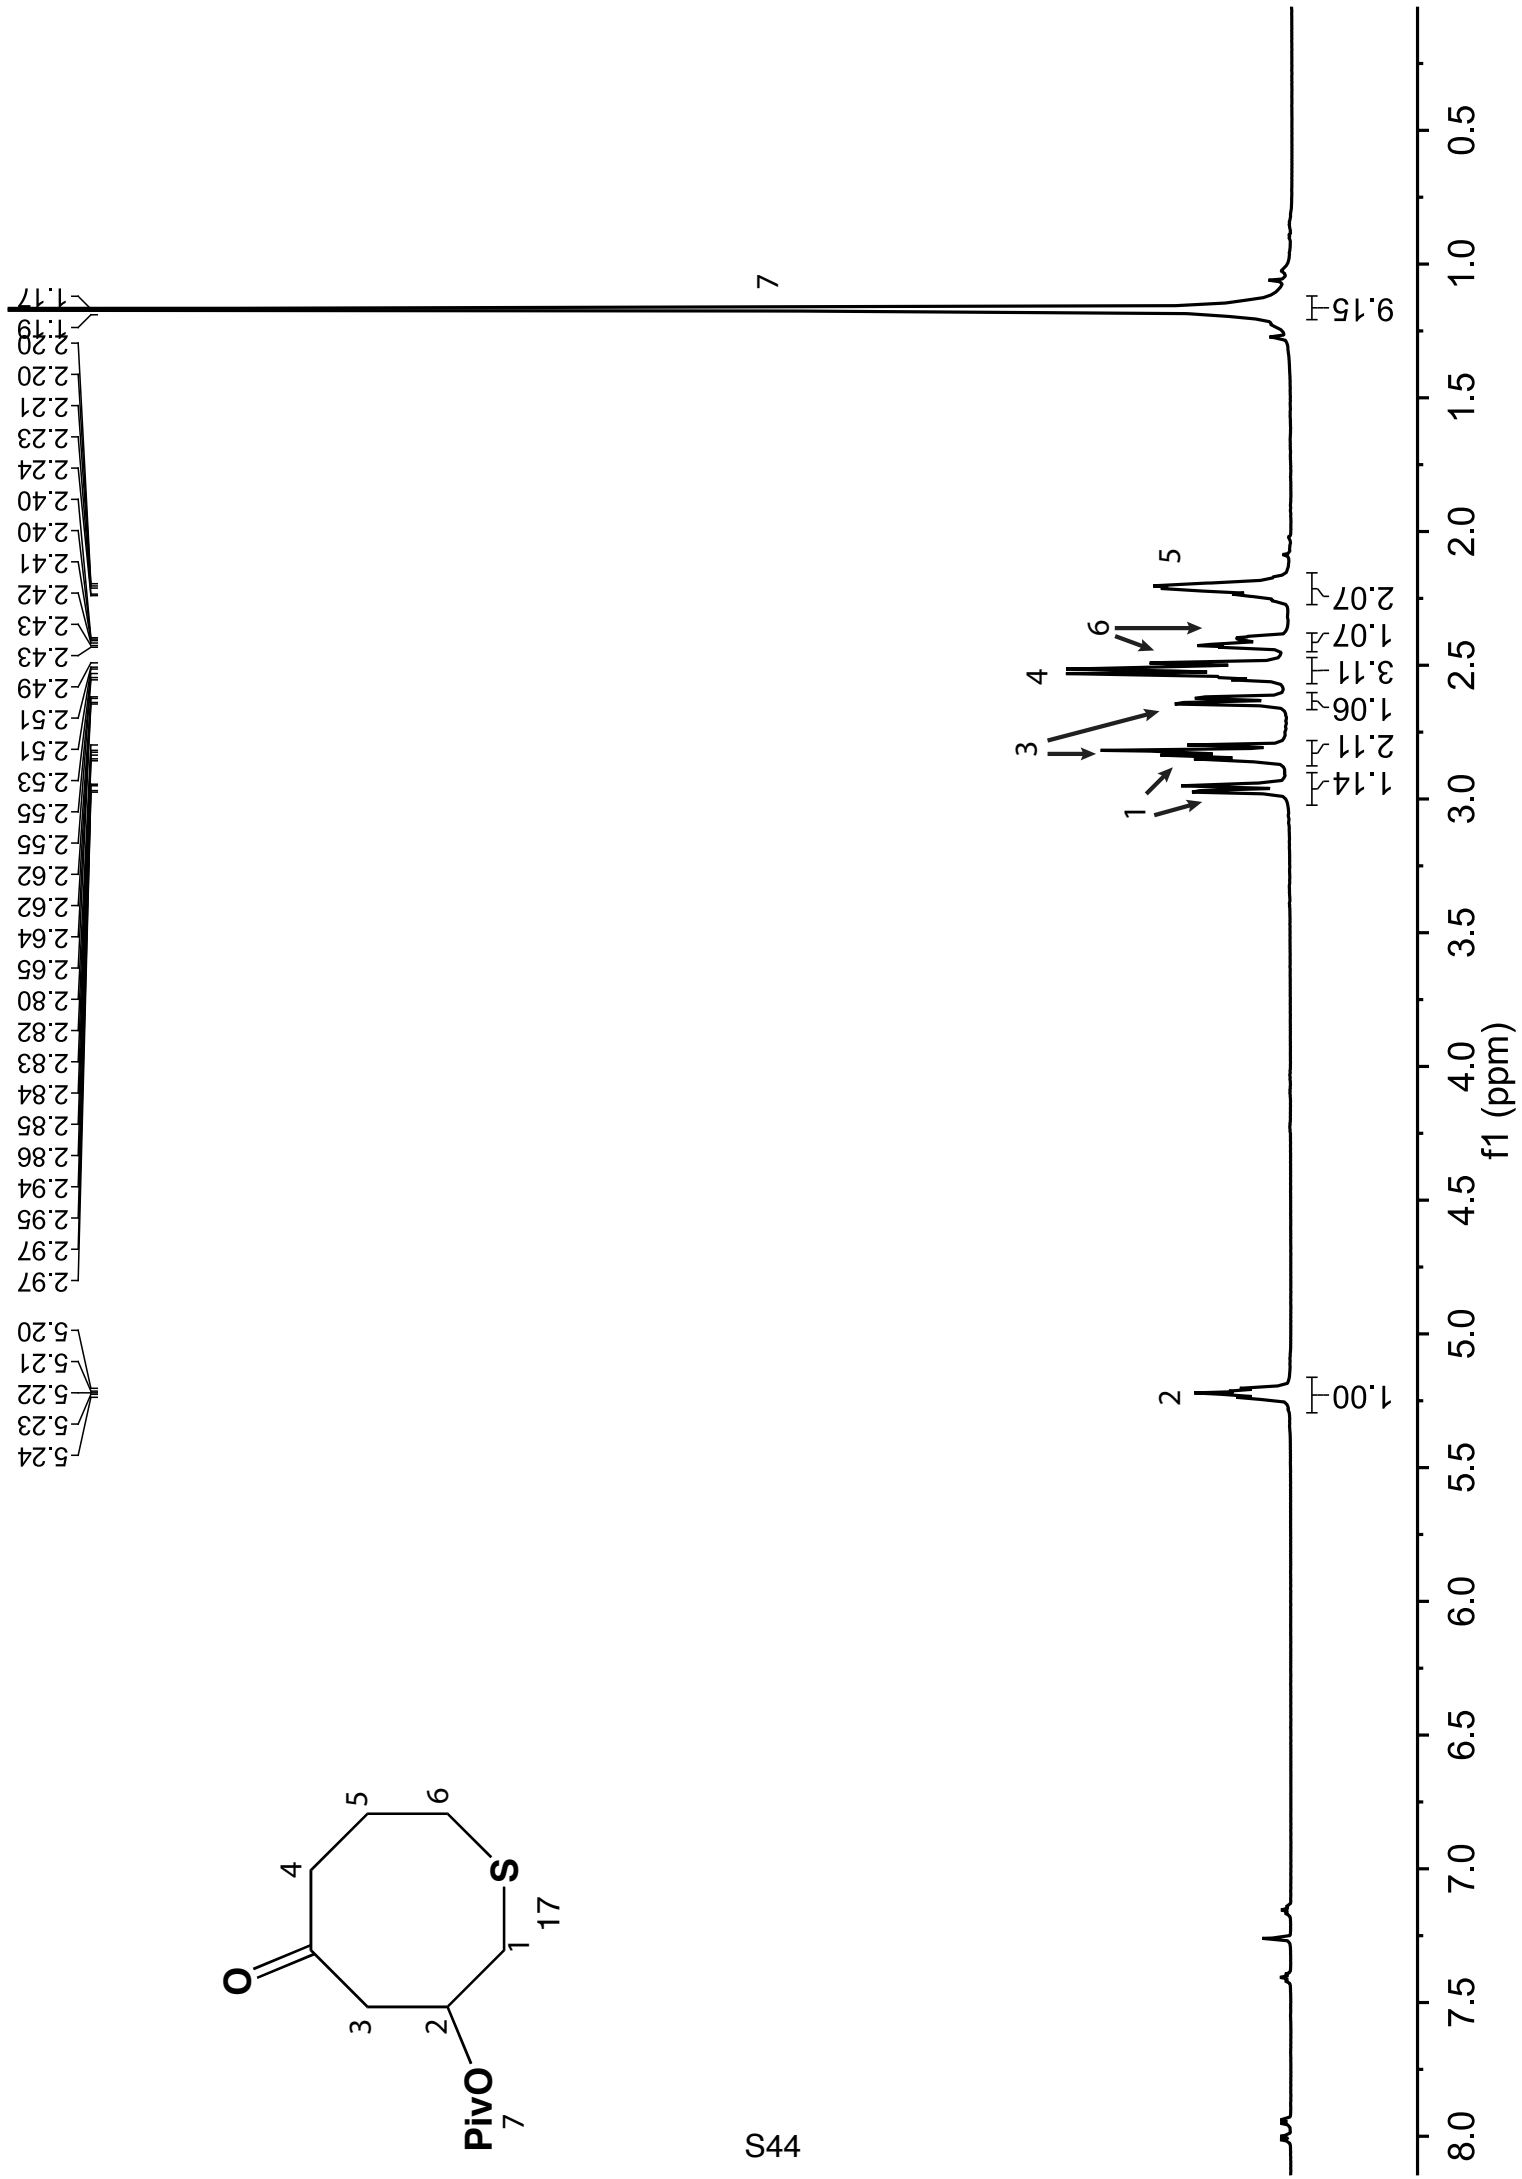



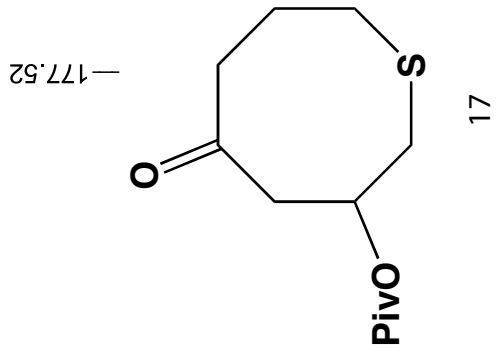

—208.95

—177.52

77.44  
77.23  
77.02  
72.62

45.19  
43.07  
38.88  
34.90  
32.87  
27.17

S45

f1 (ppm)

210 190 170 150 130 110 90 80 70 60 50 40 30 20 10 0

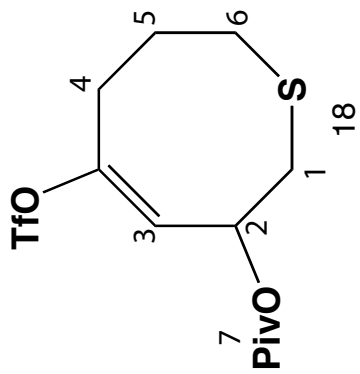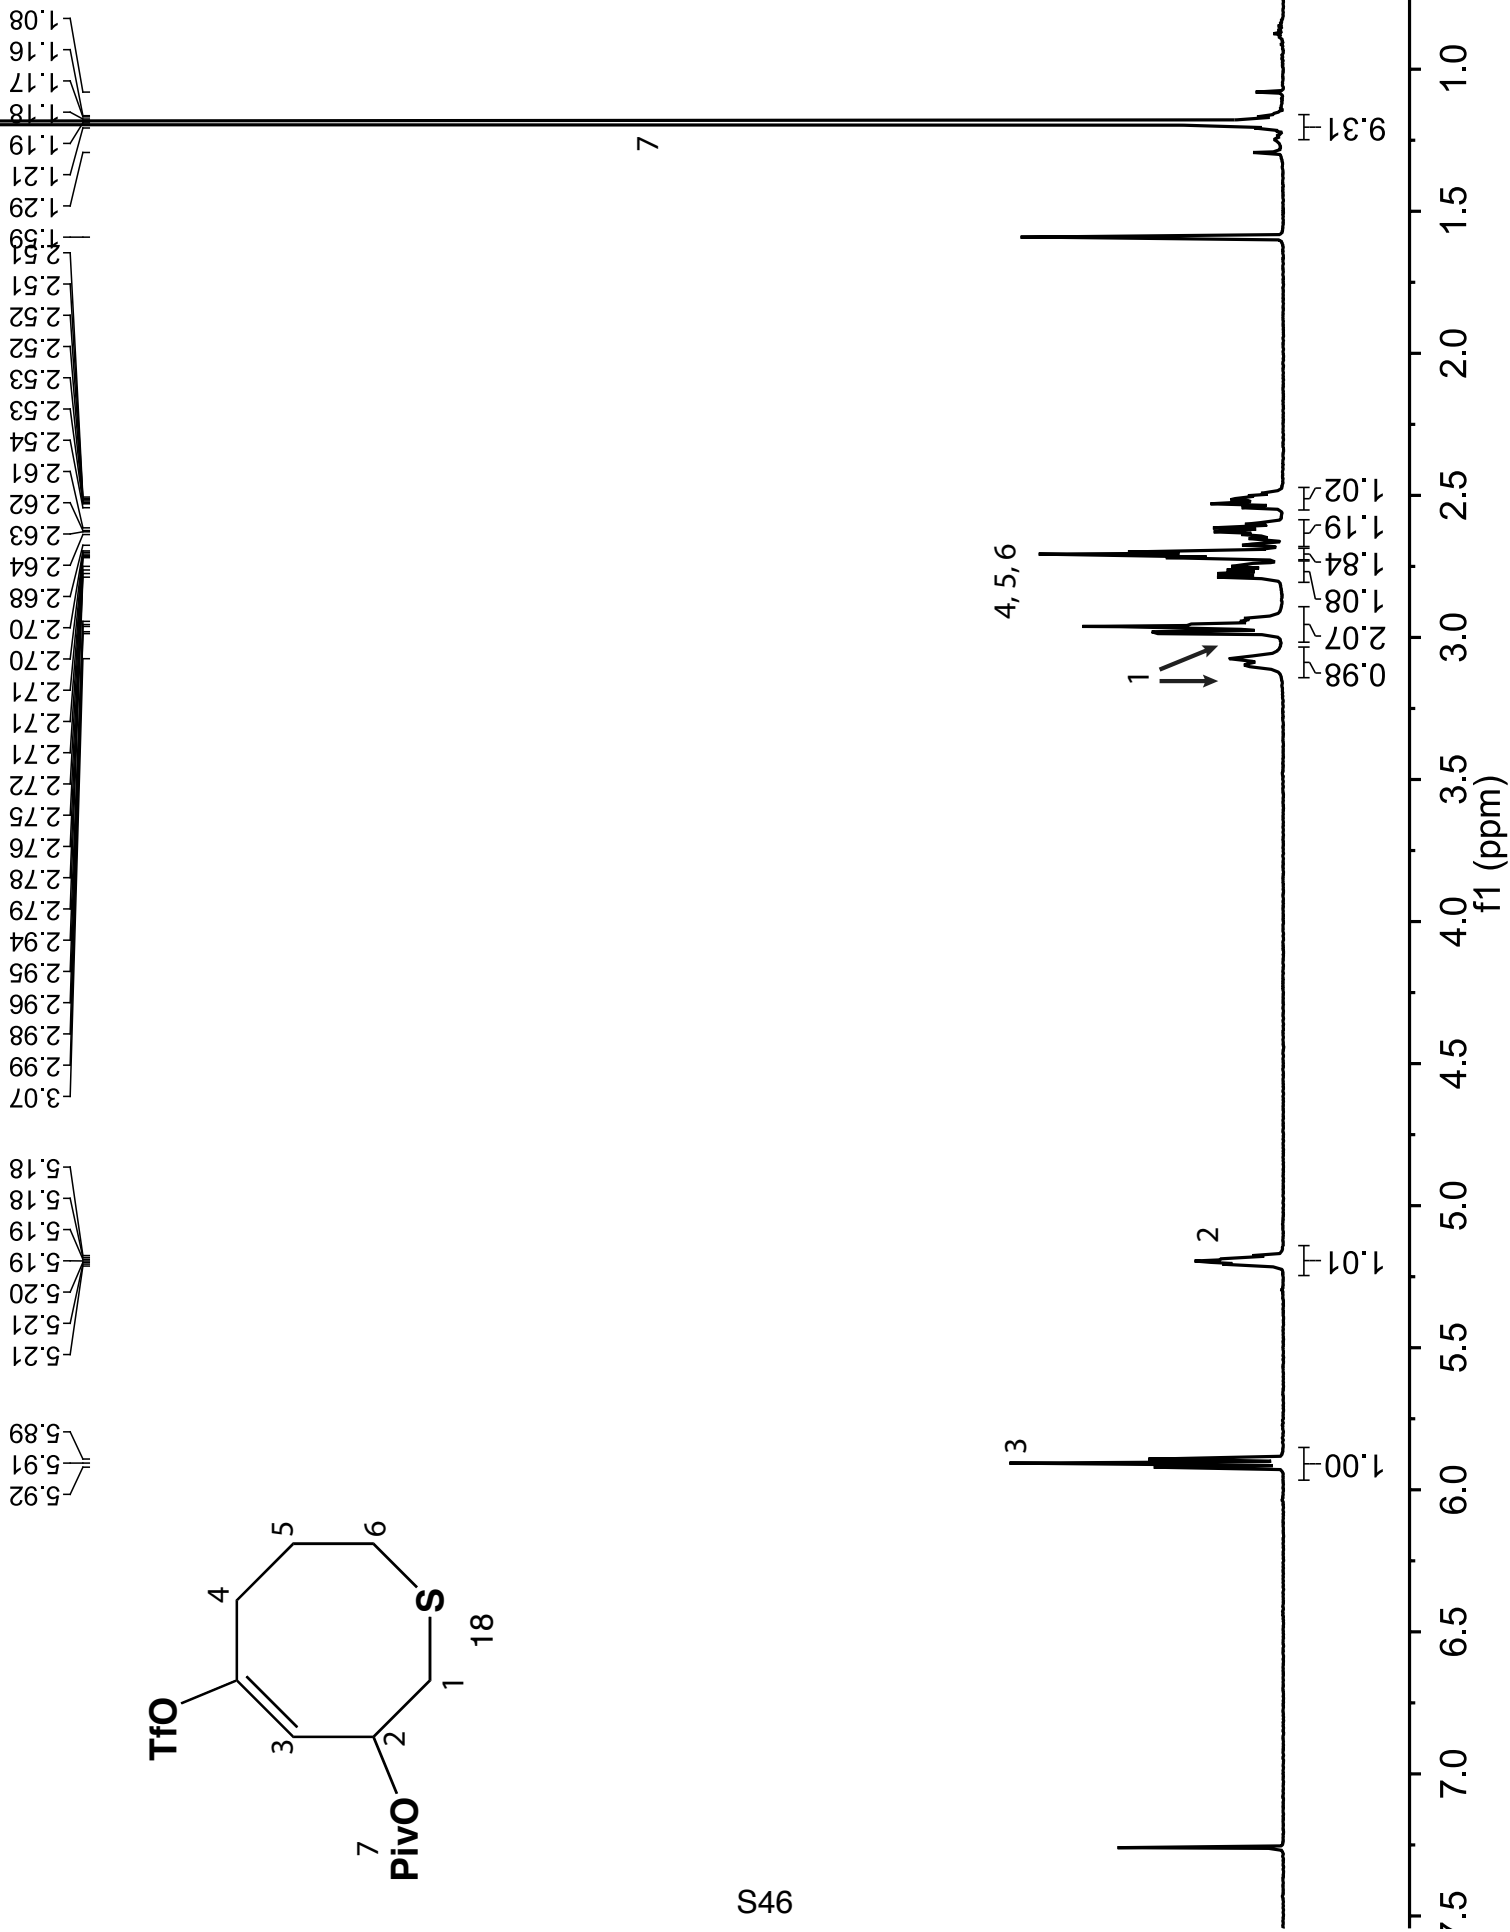

27.17  
30.29  
32.46  
33.98  
34.28  
38.97

73.80  
77.02  
77.23  
77.44

115.51  
117.64  
119.76  
121.88  
122.62

149.68

177.74

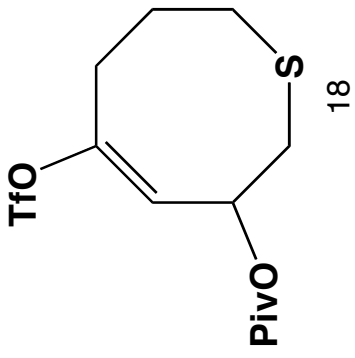

S47

0 10 20 30 40 50 60 70 80 90 100 110 120 130 140 150 160 170 180 190 200

f1 (ppm)

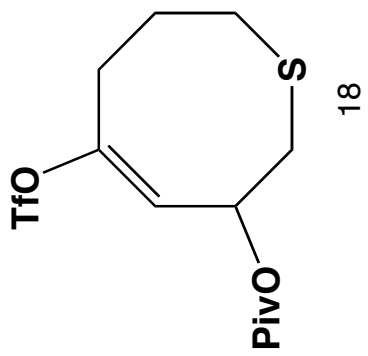

S48

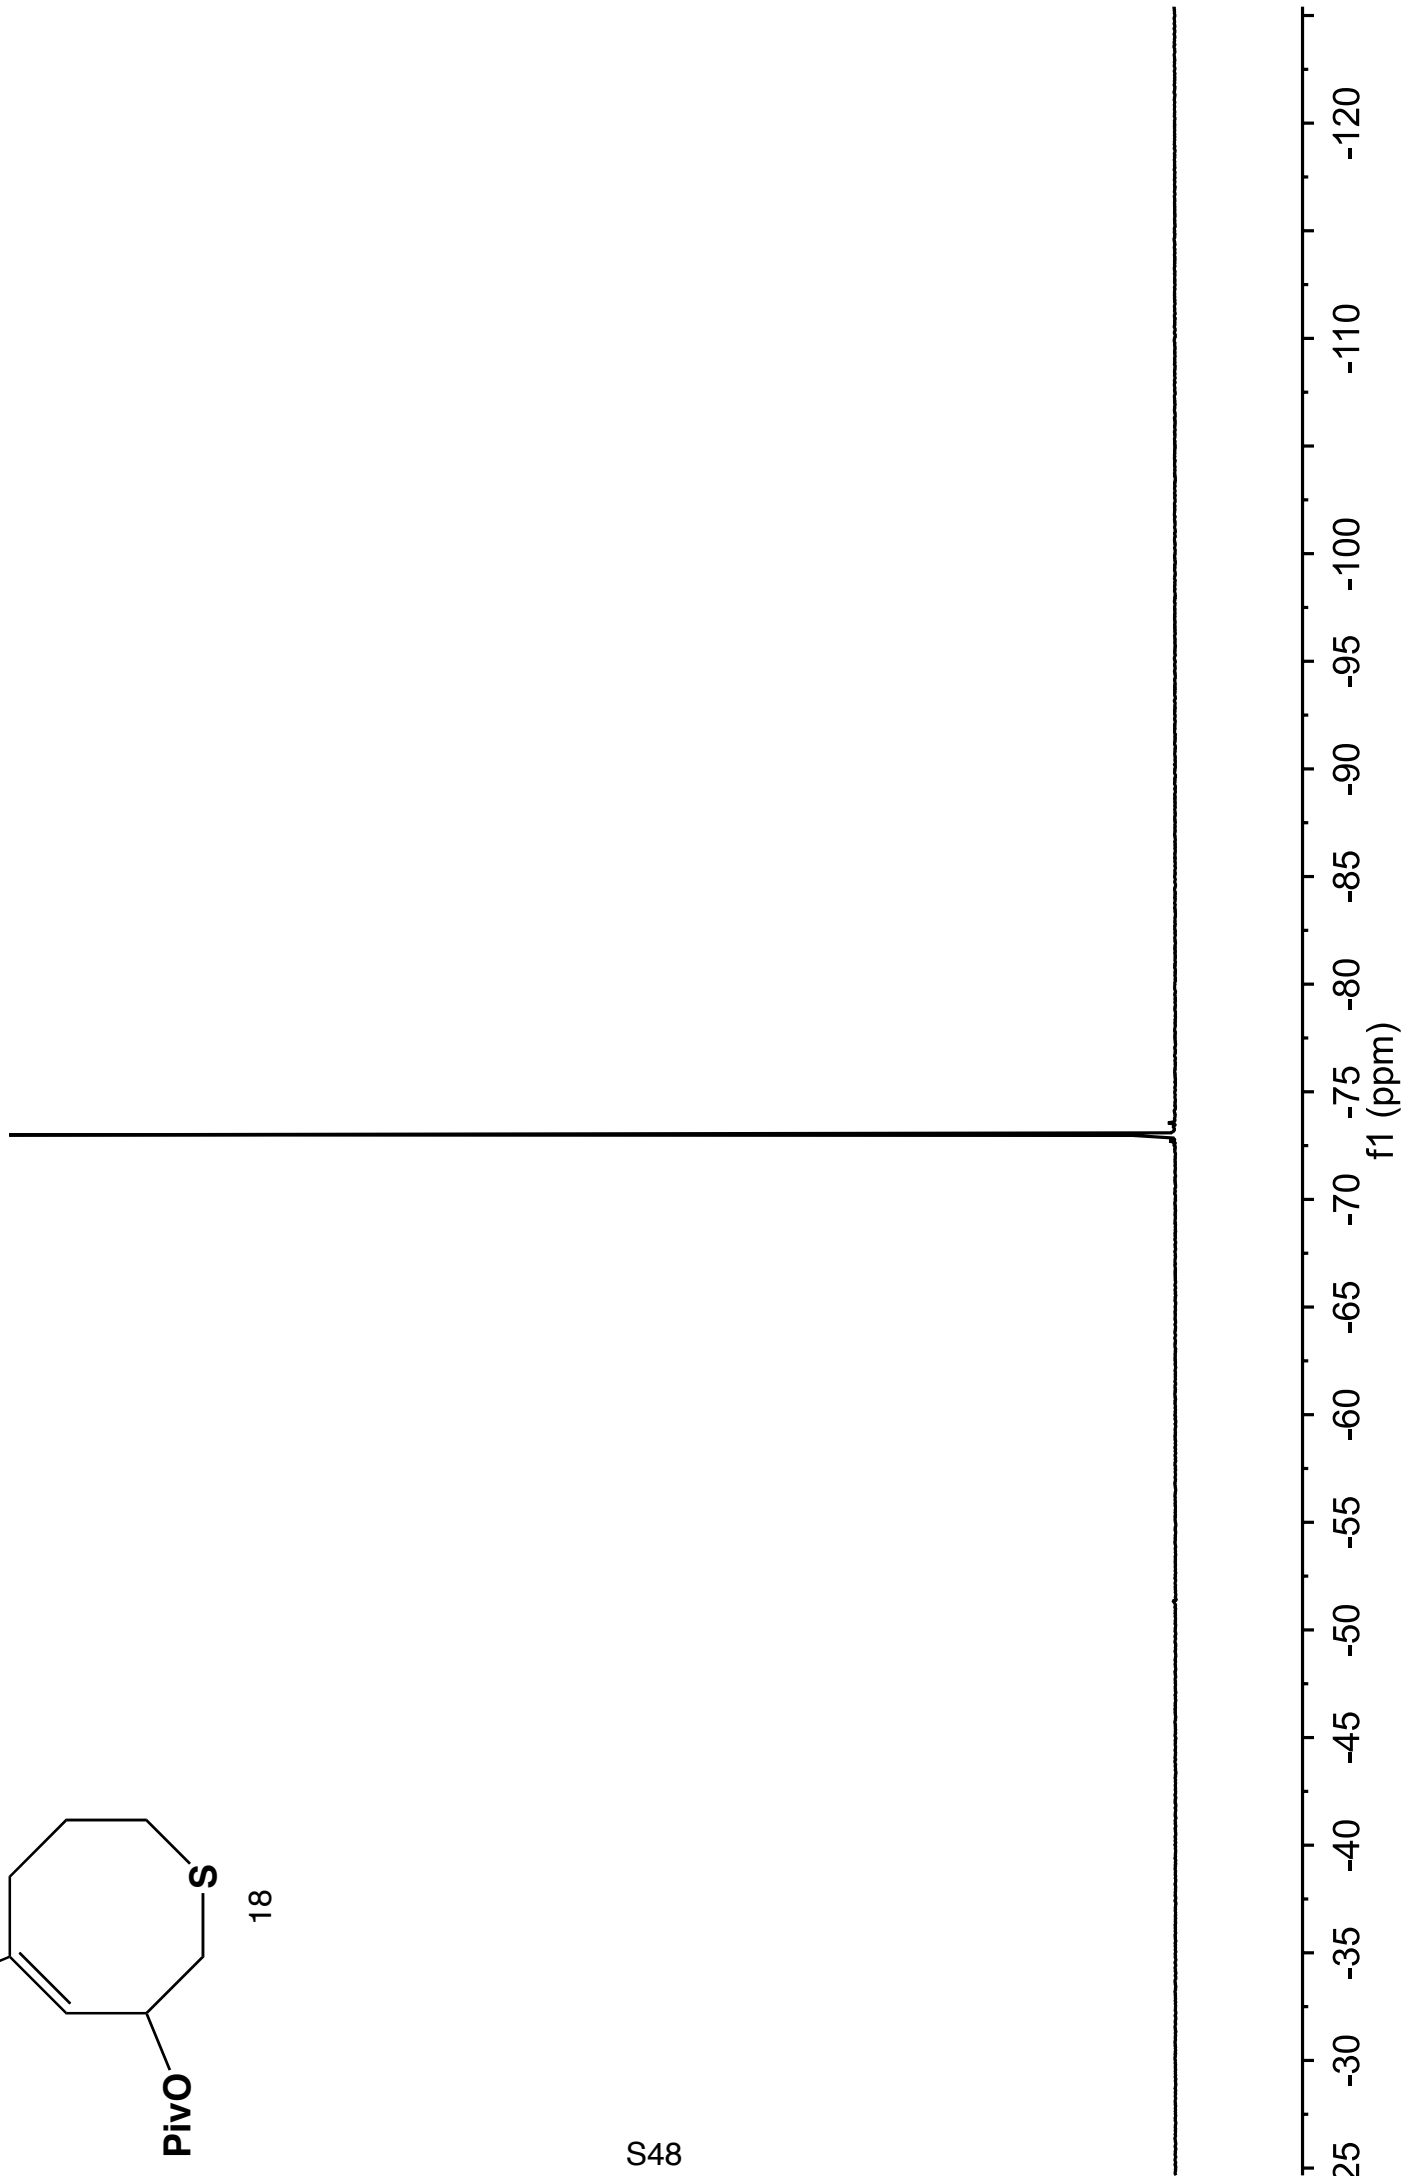

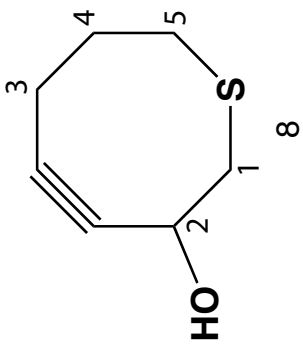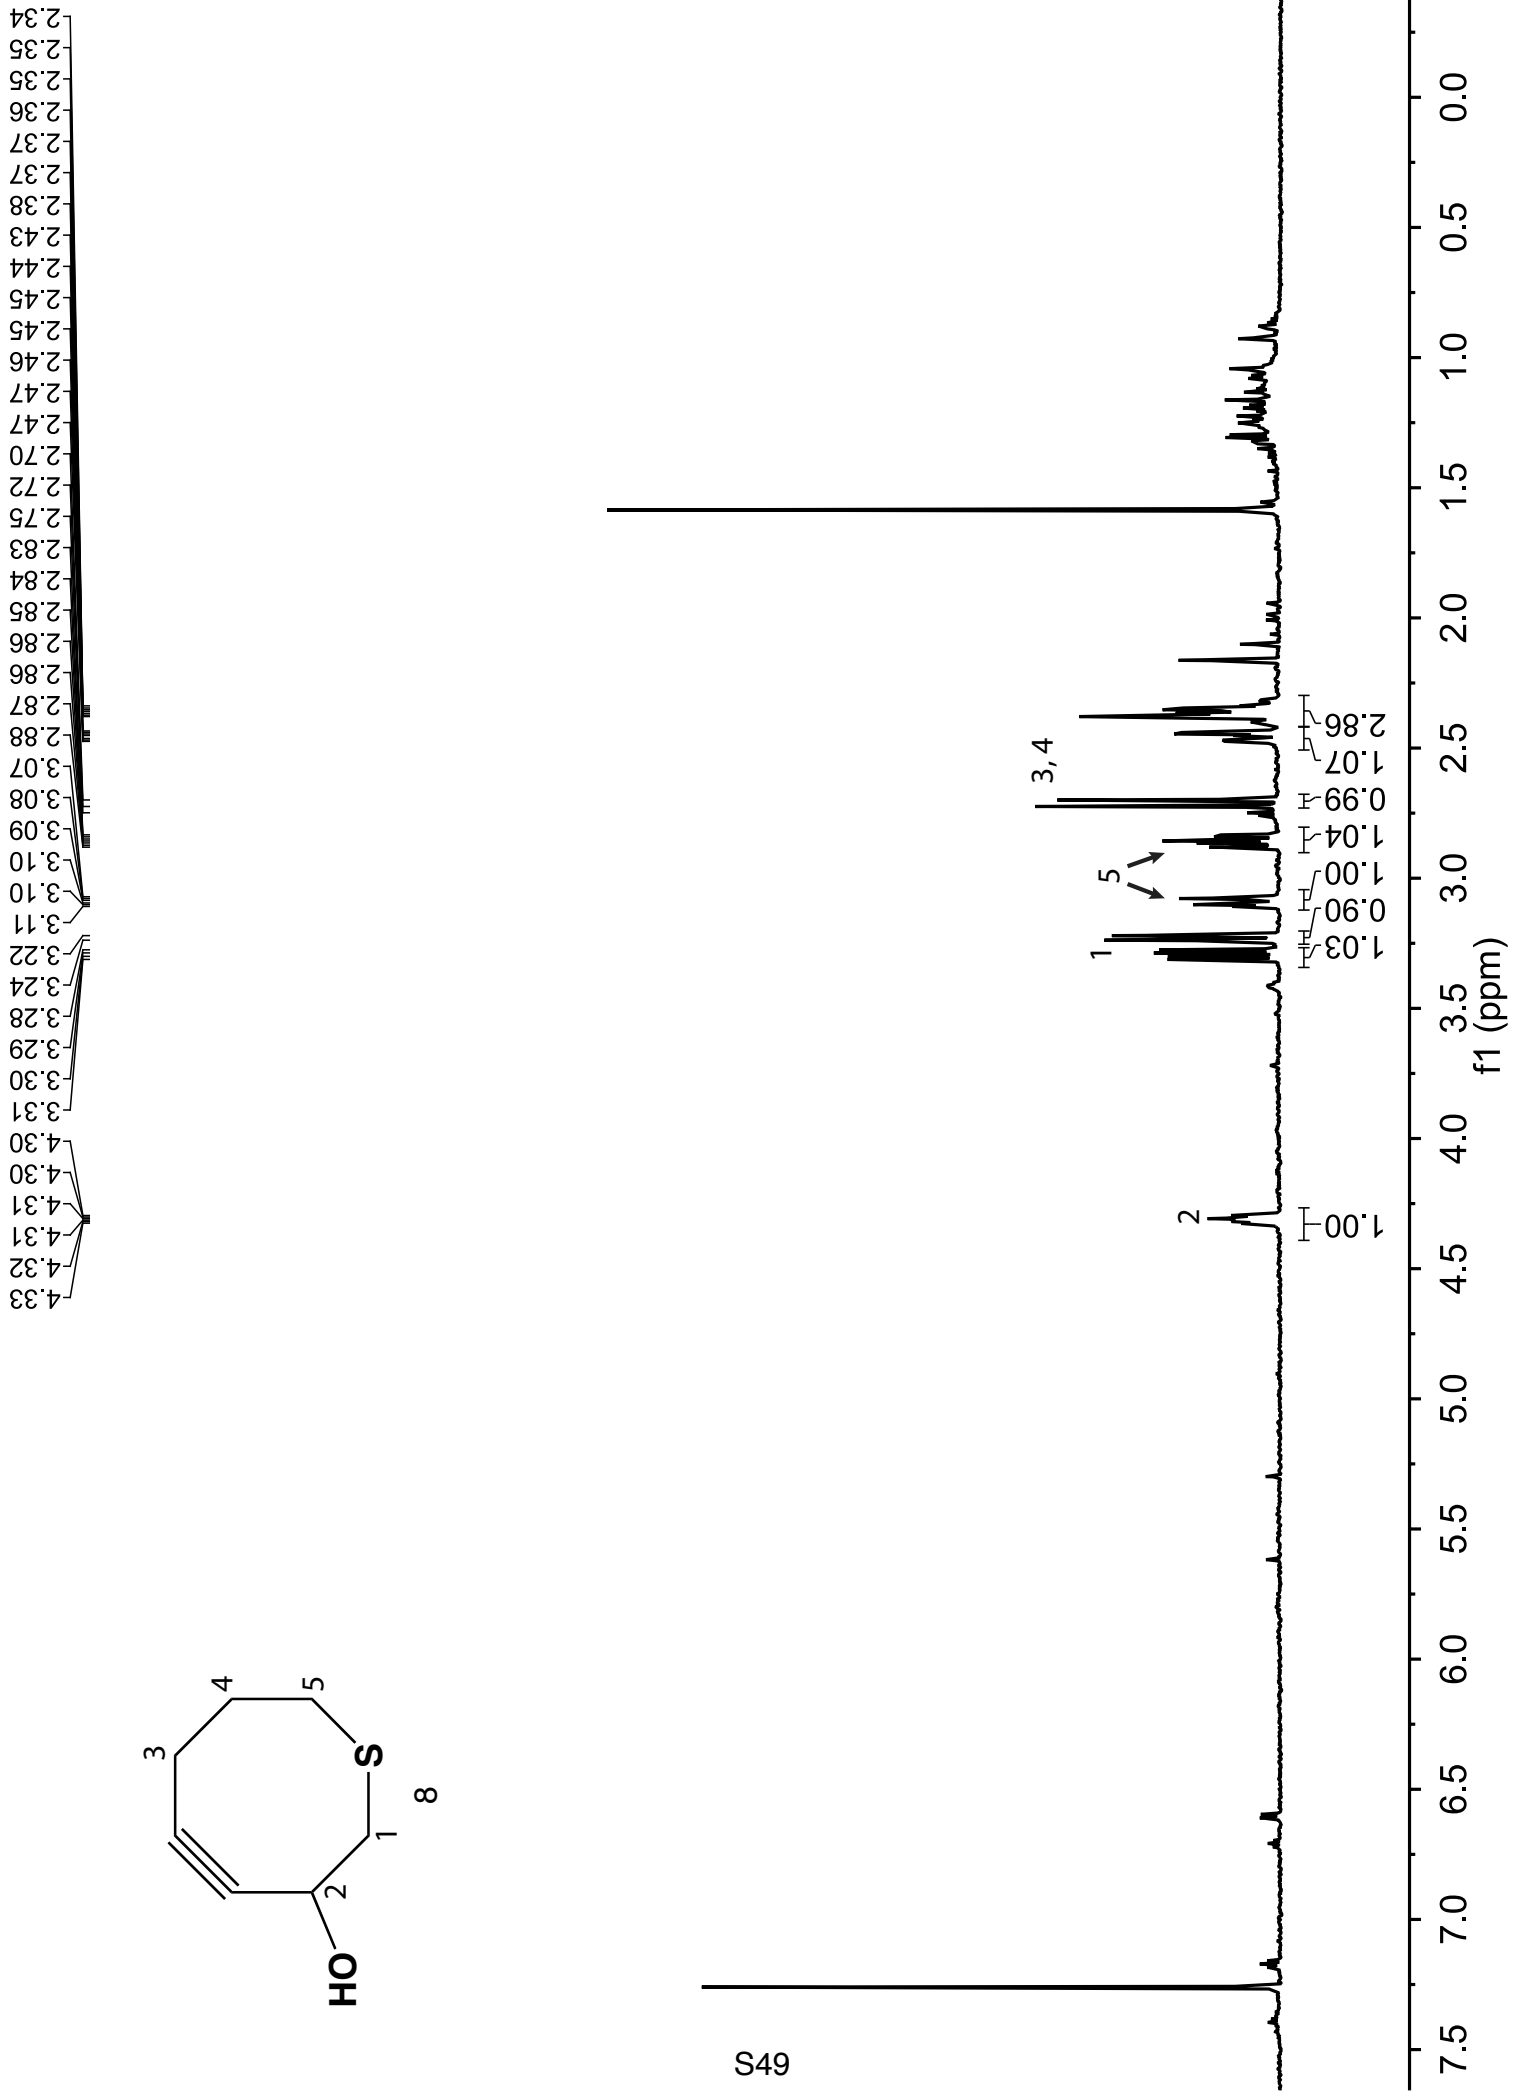

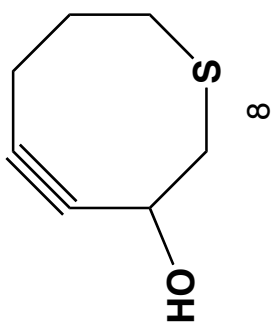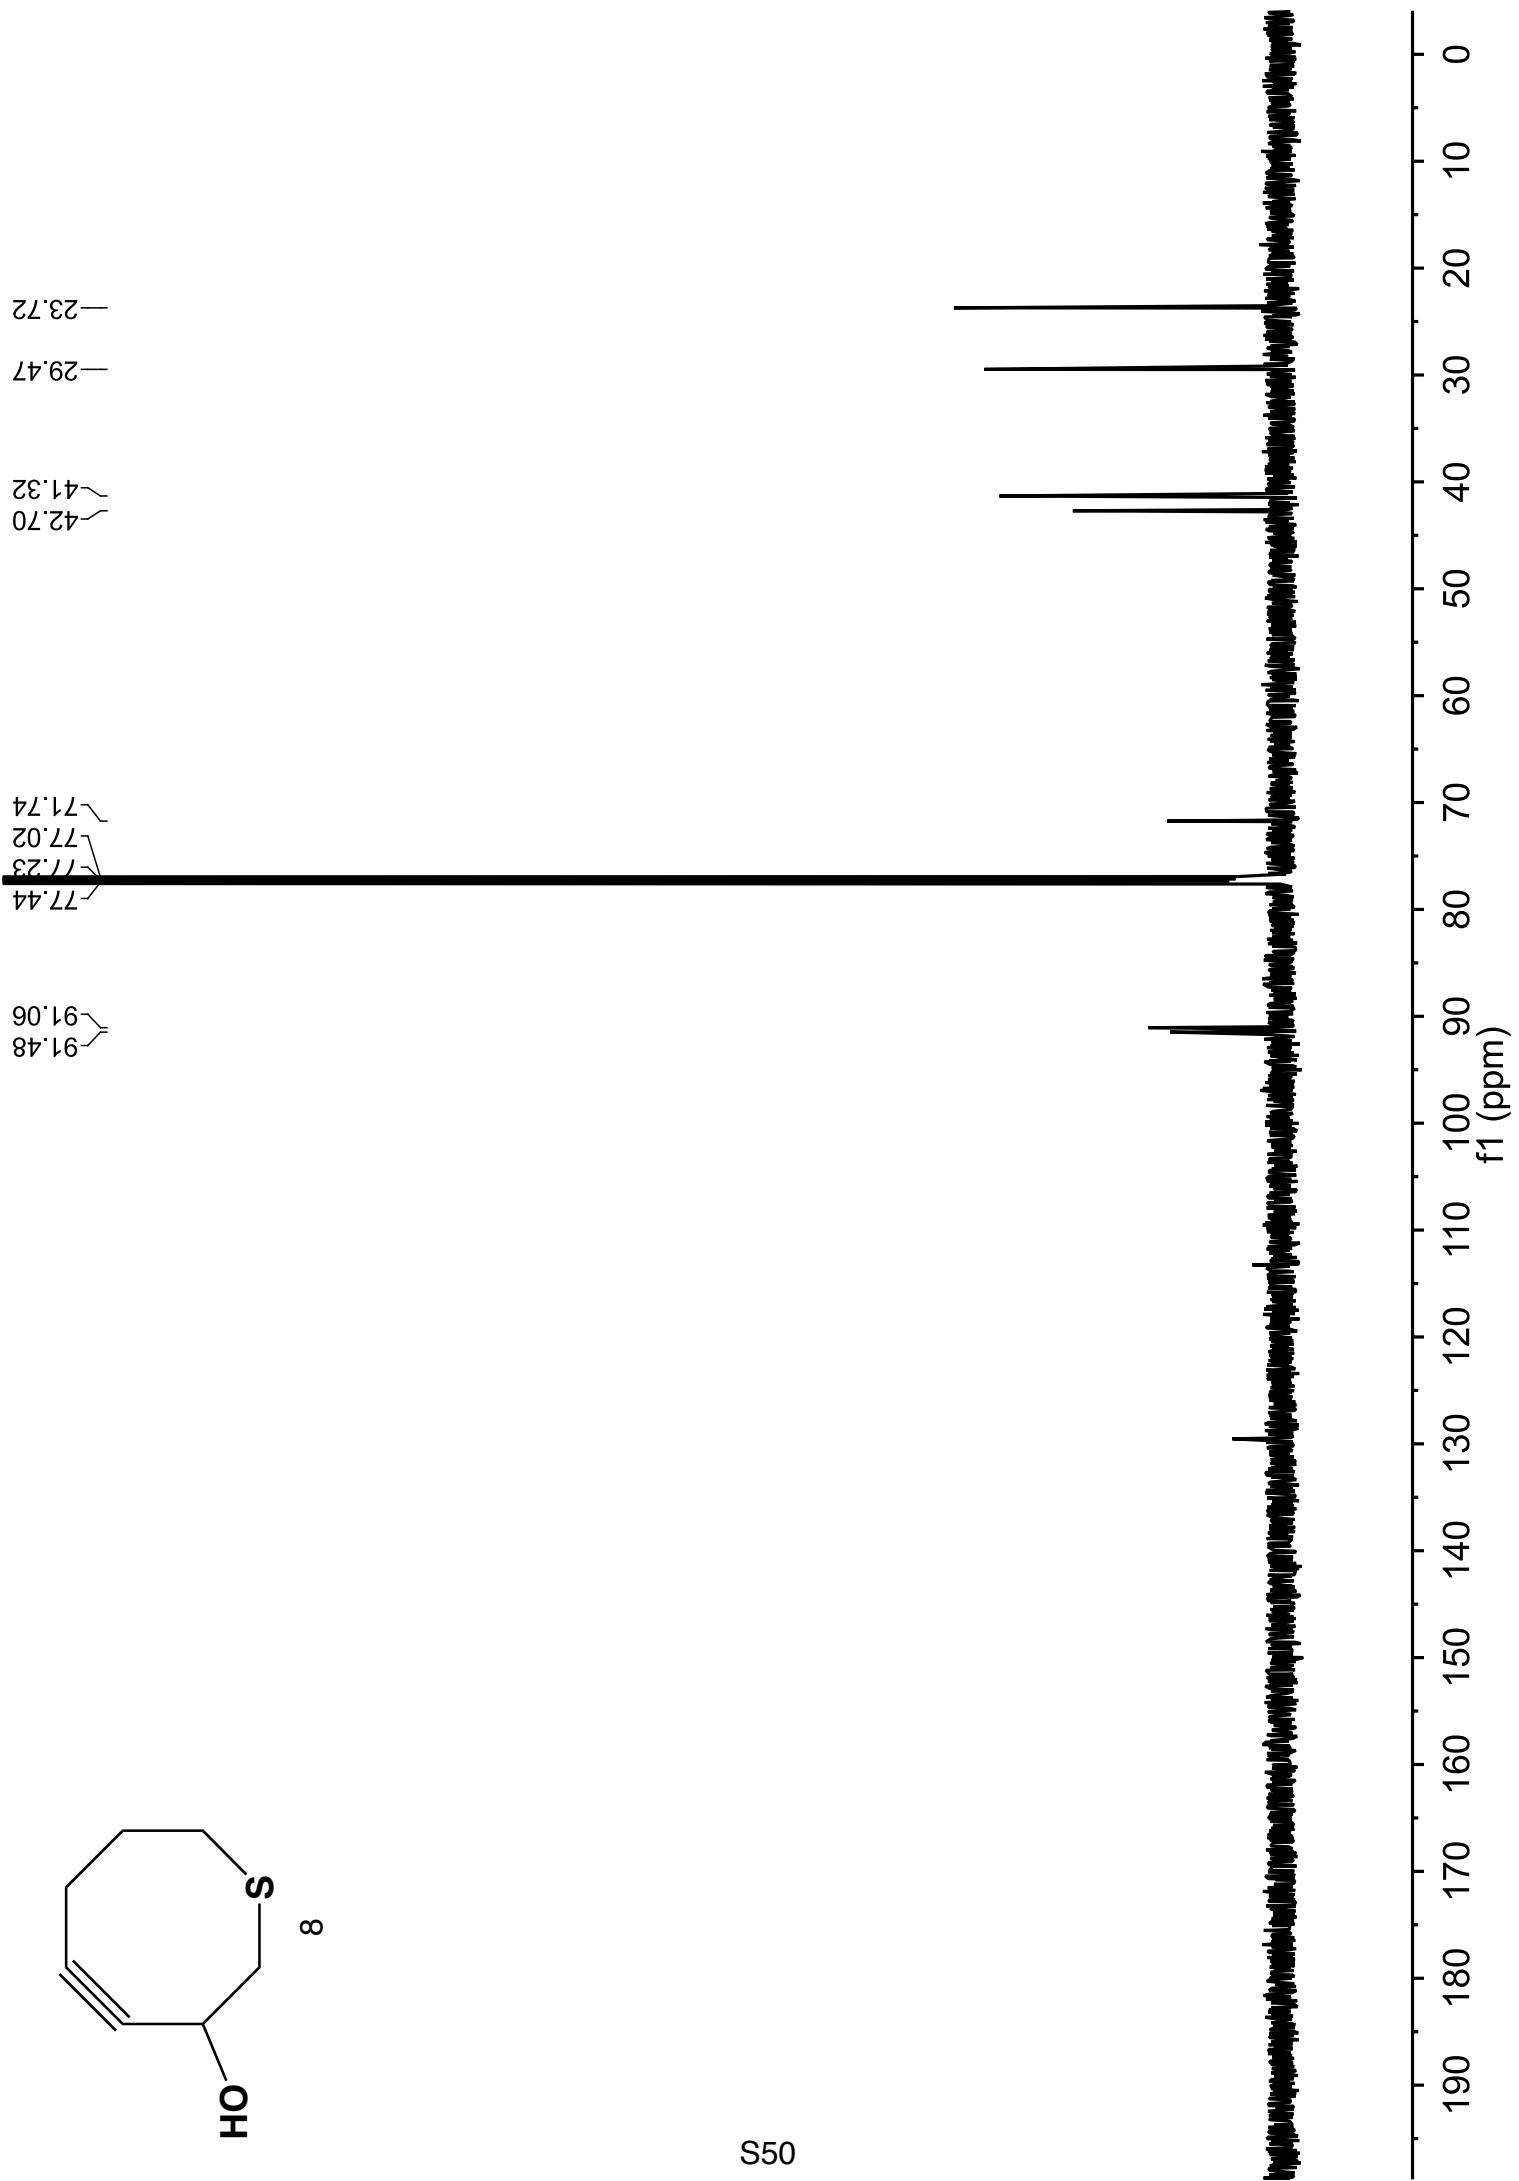

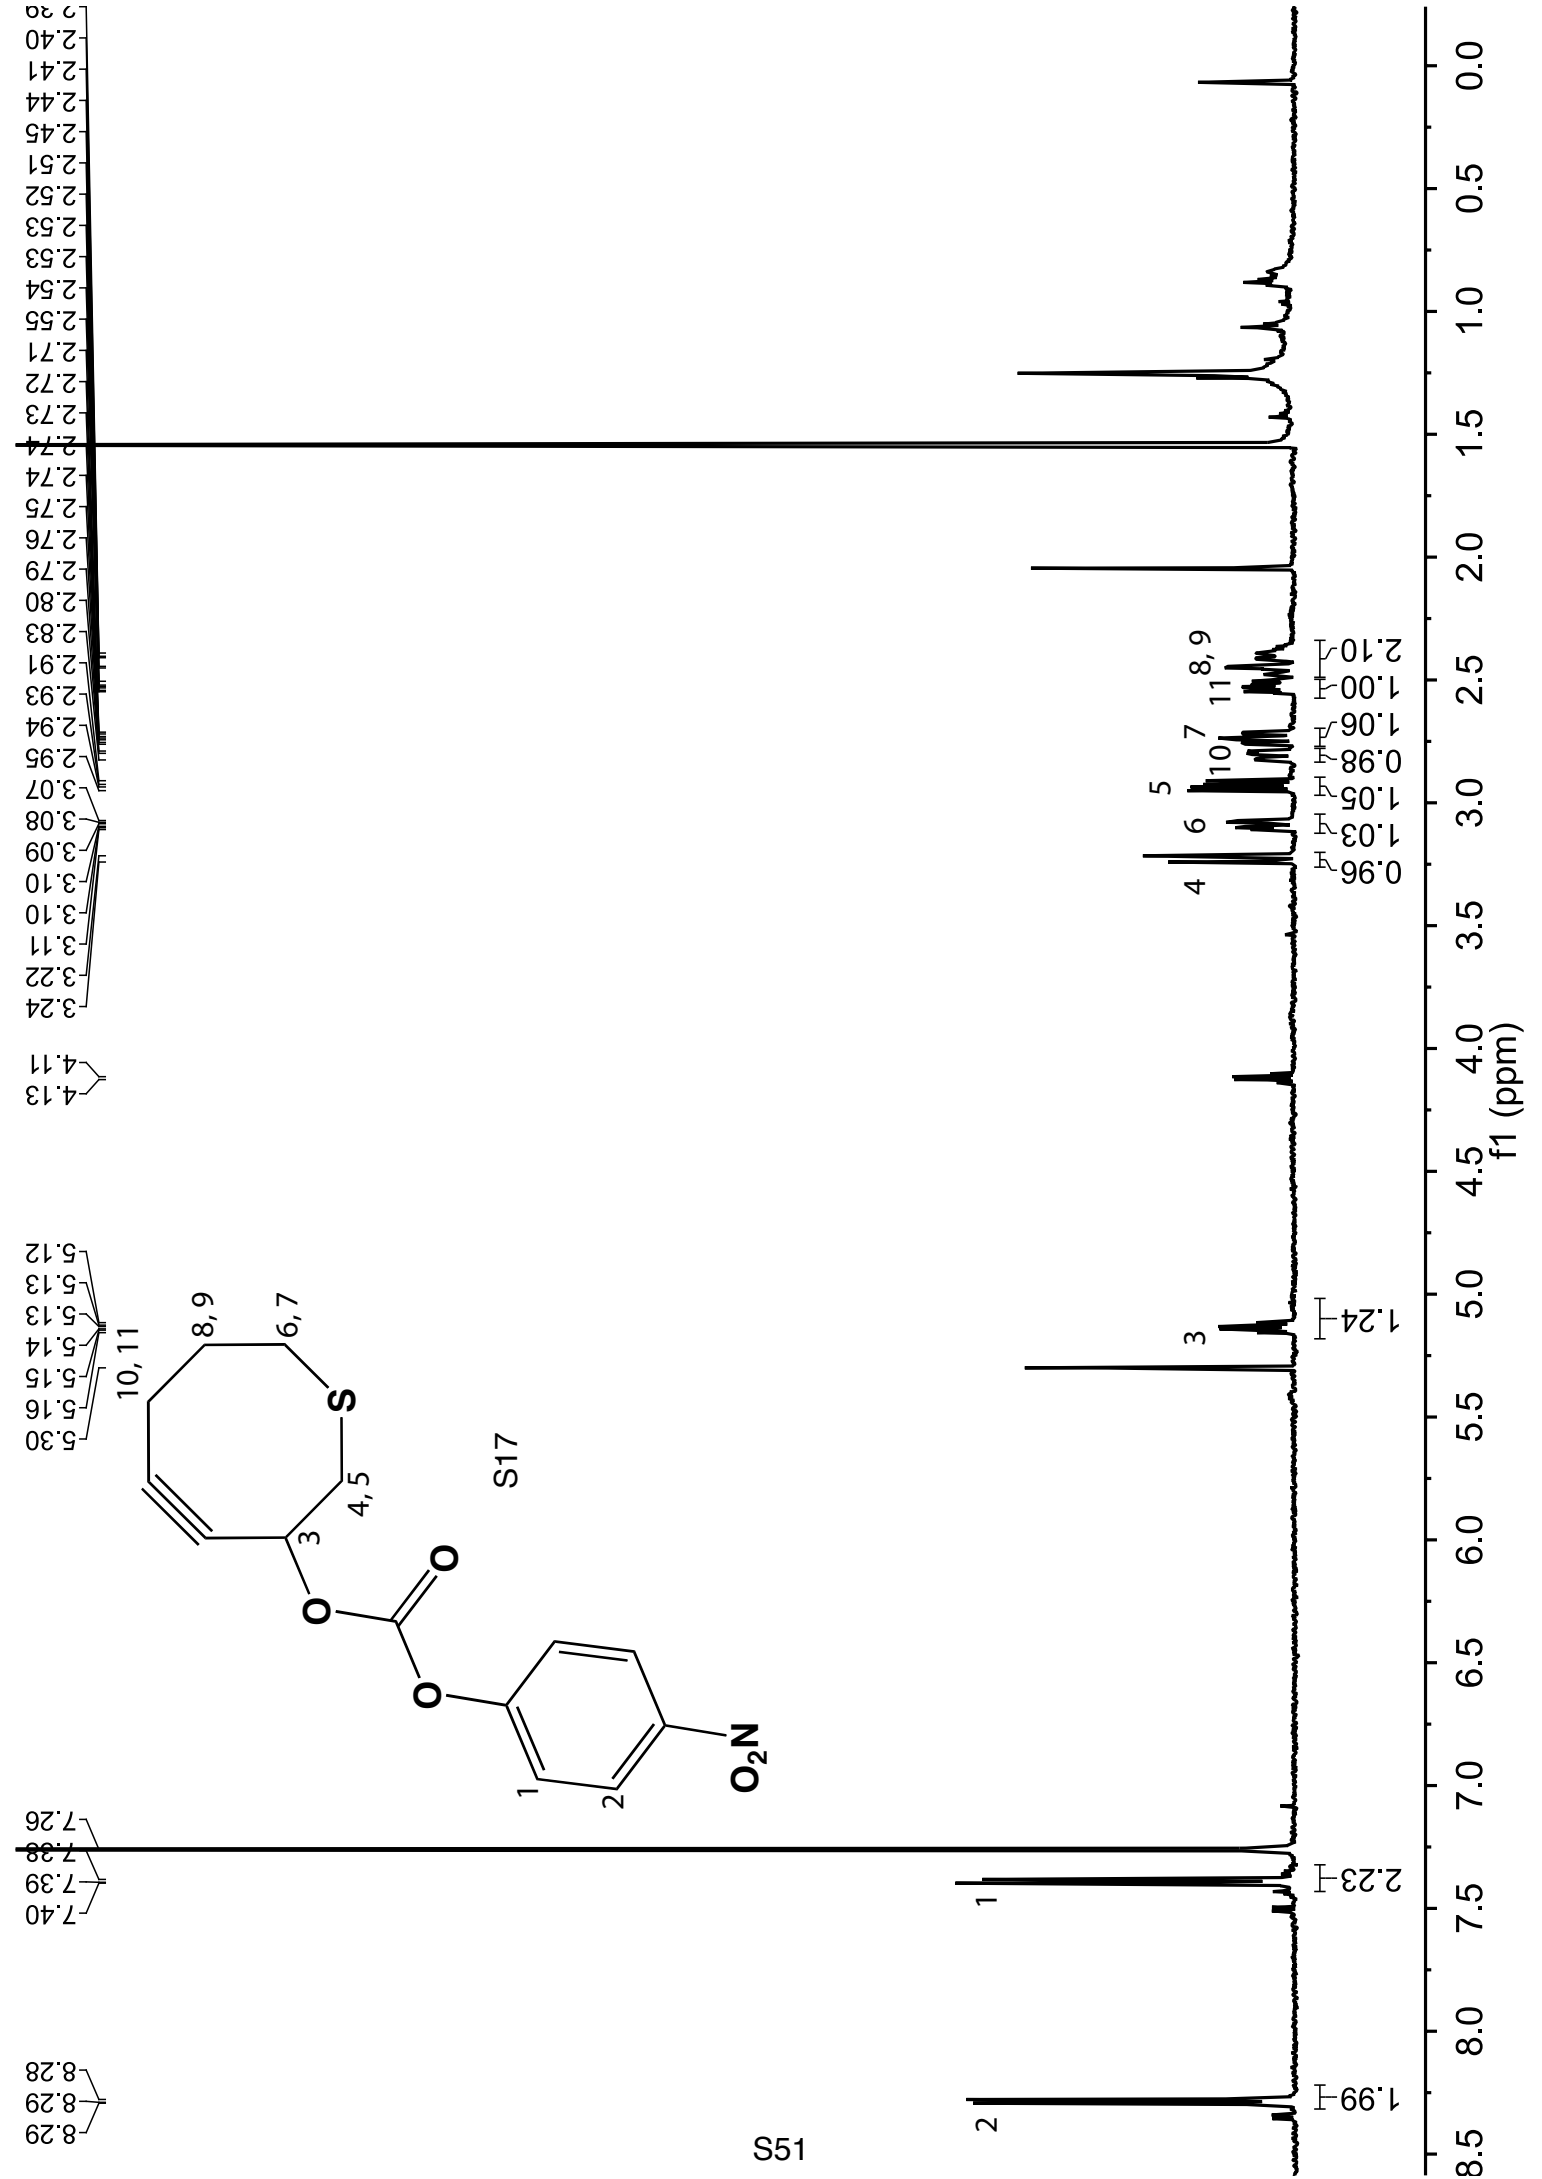

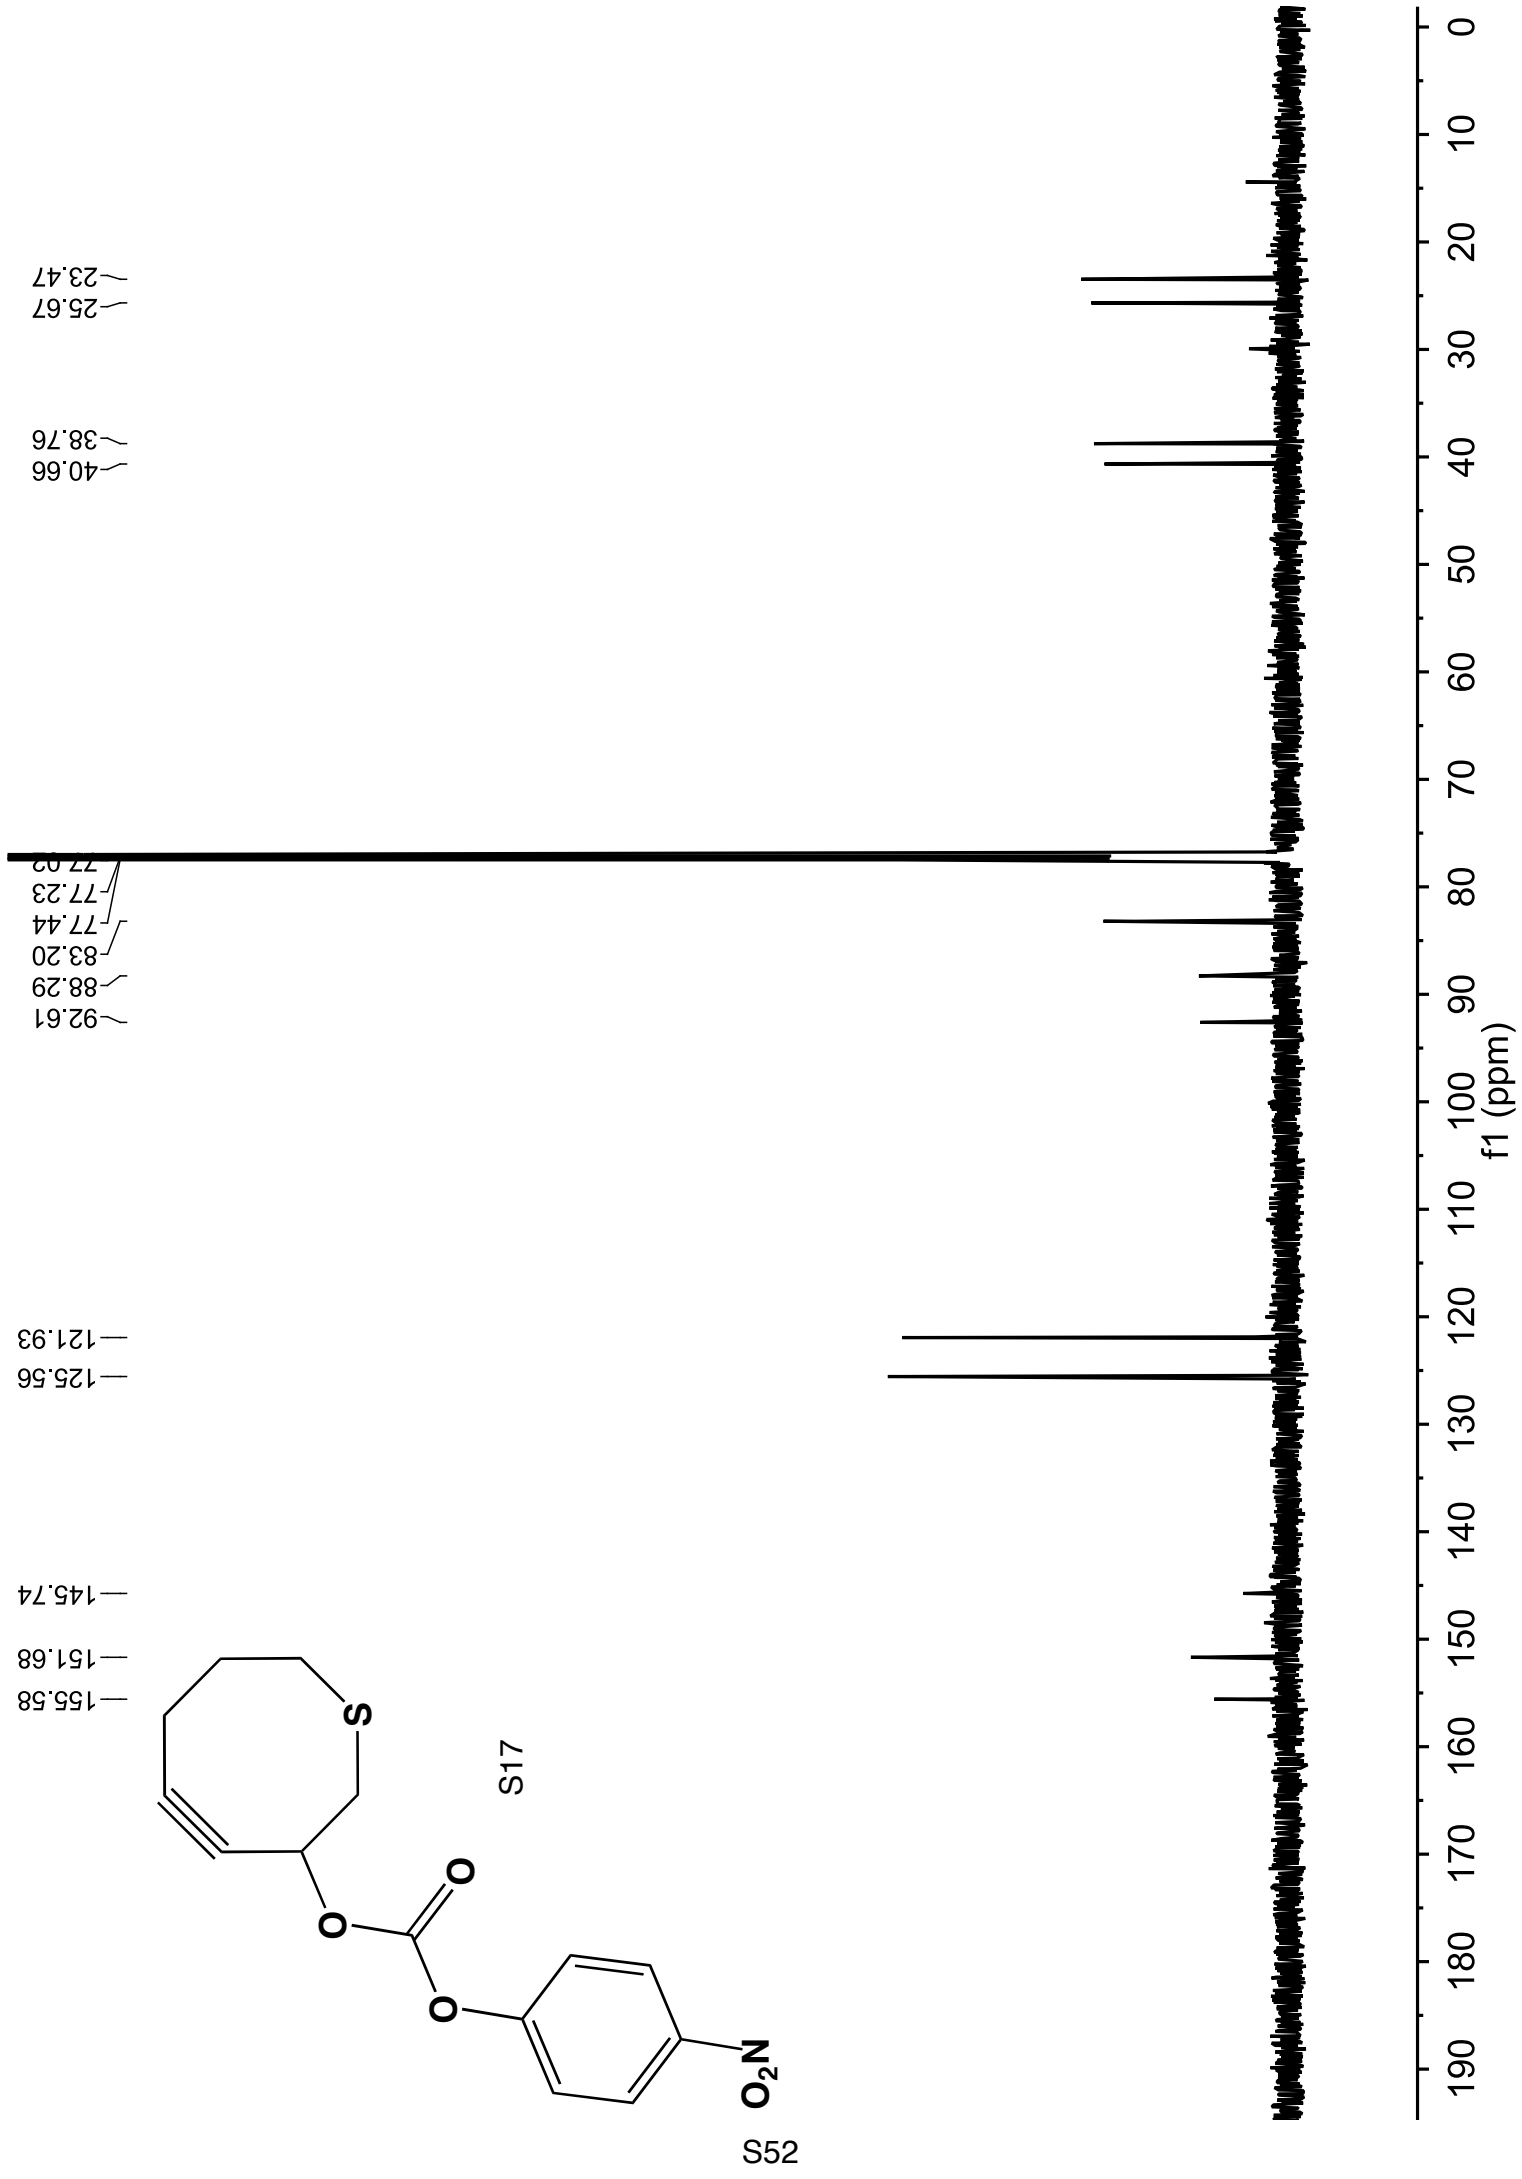



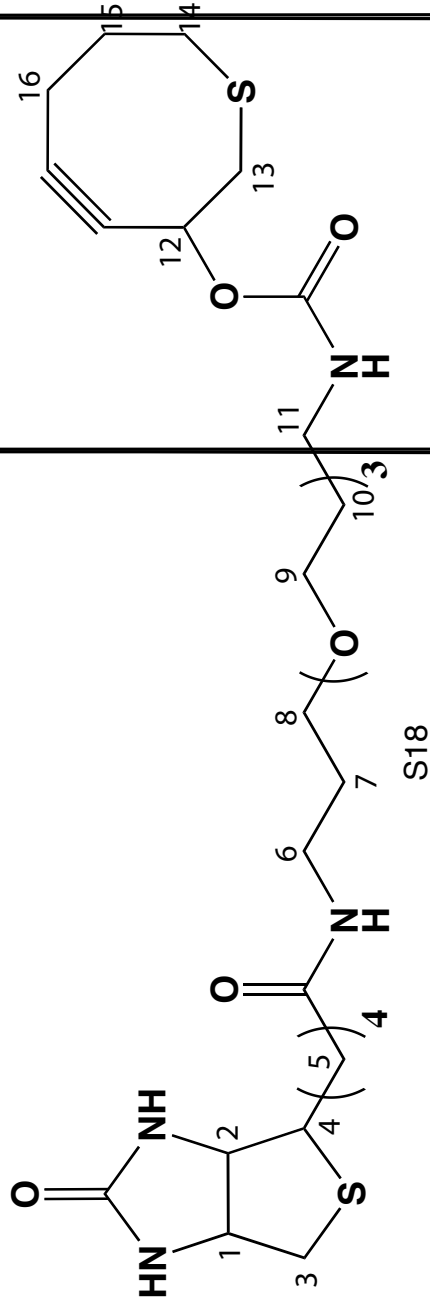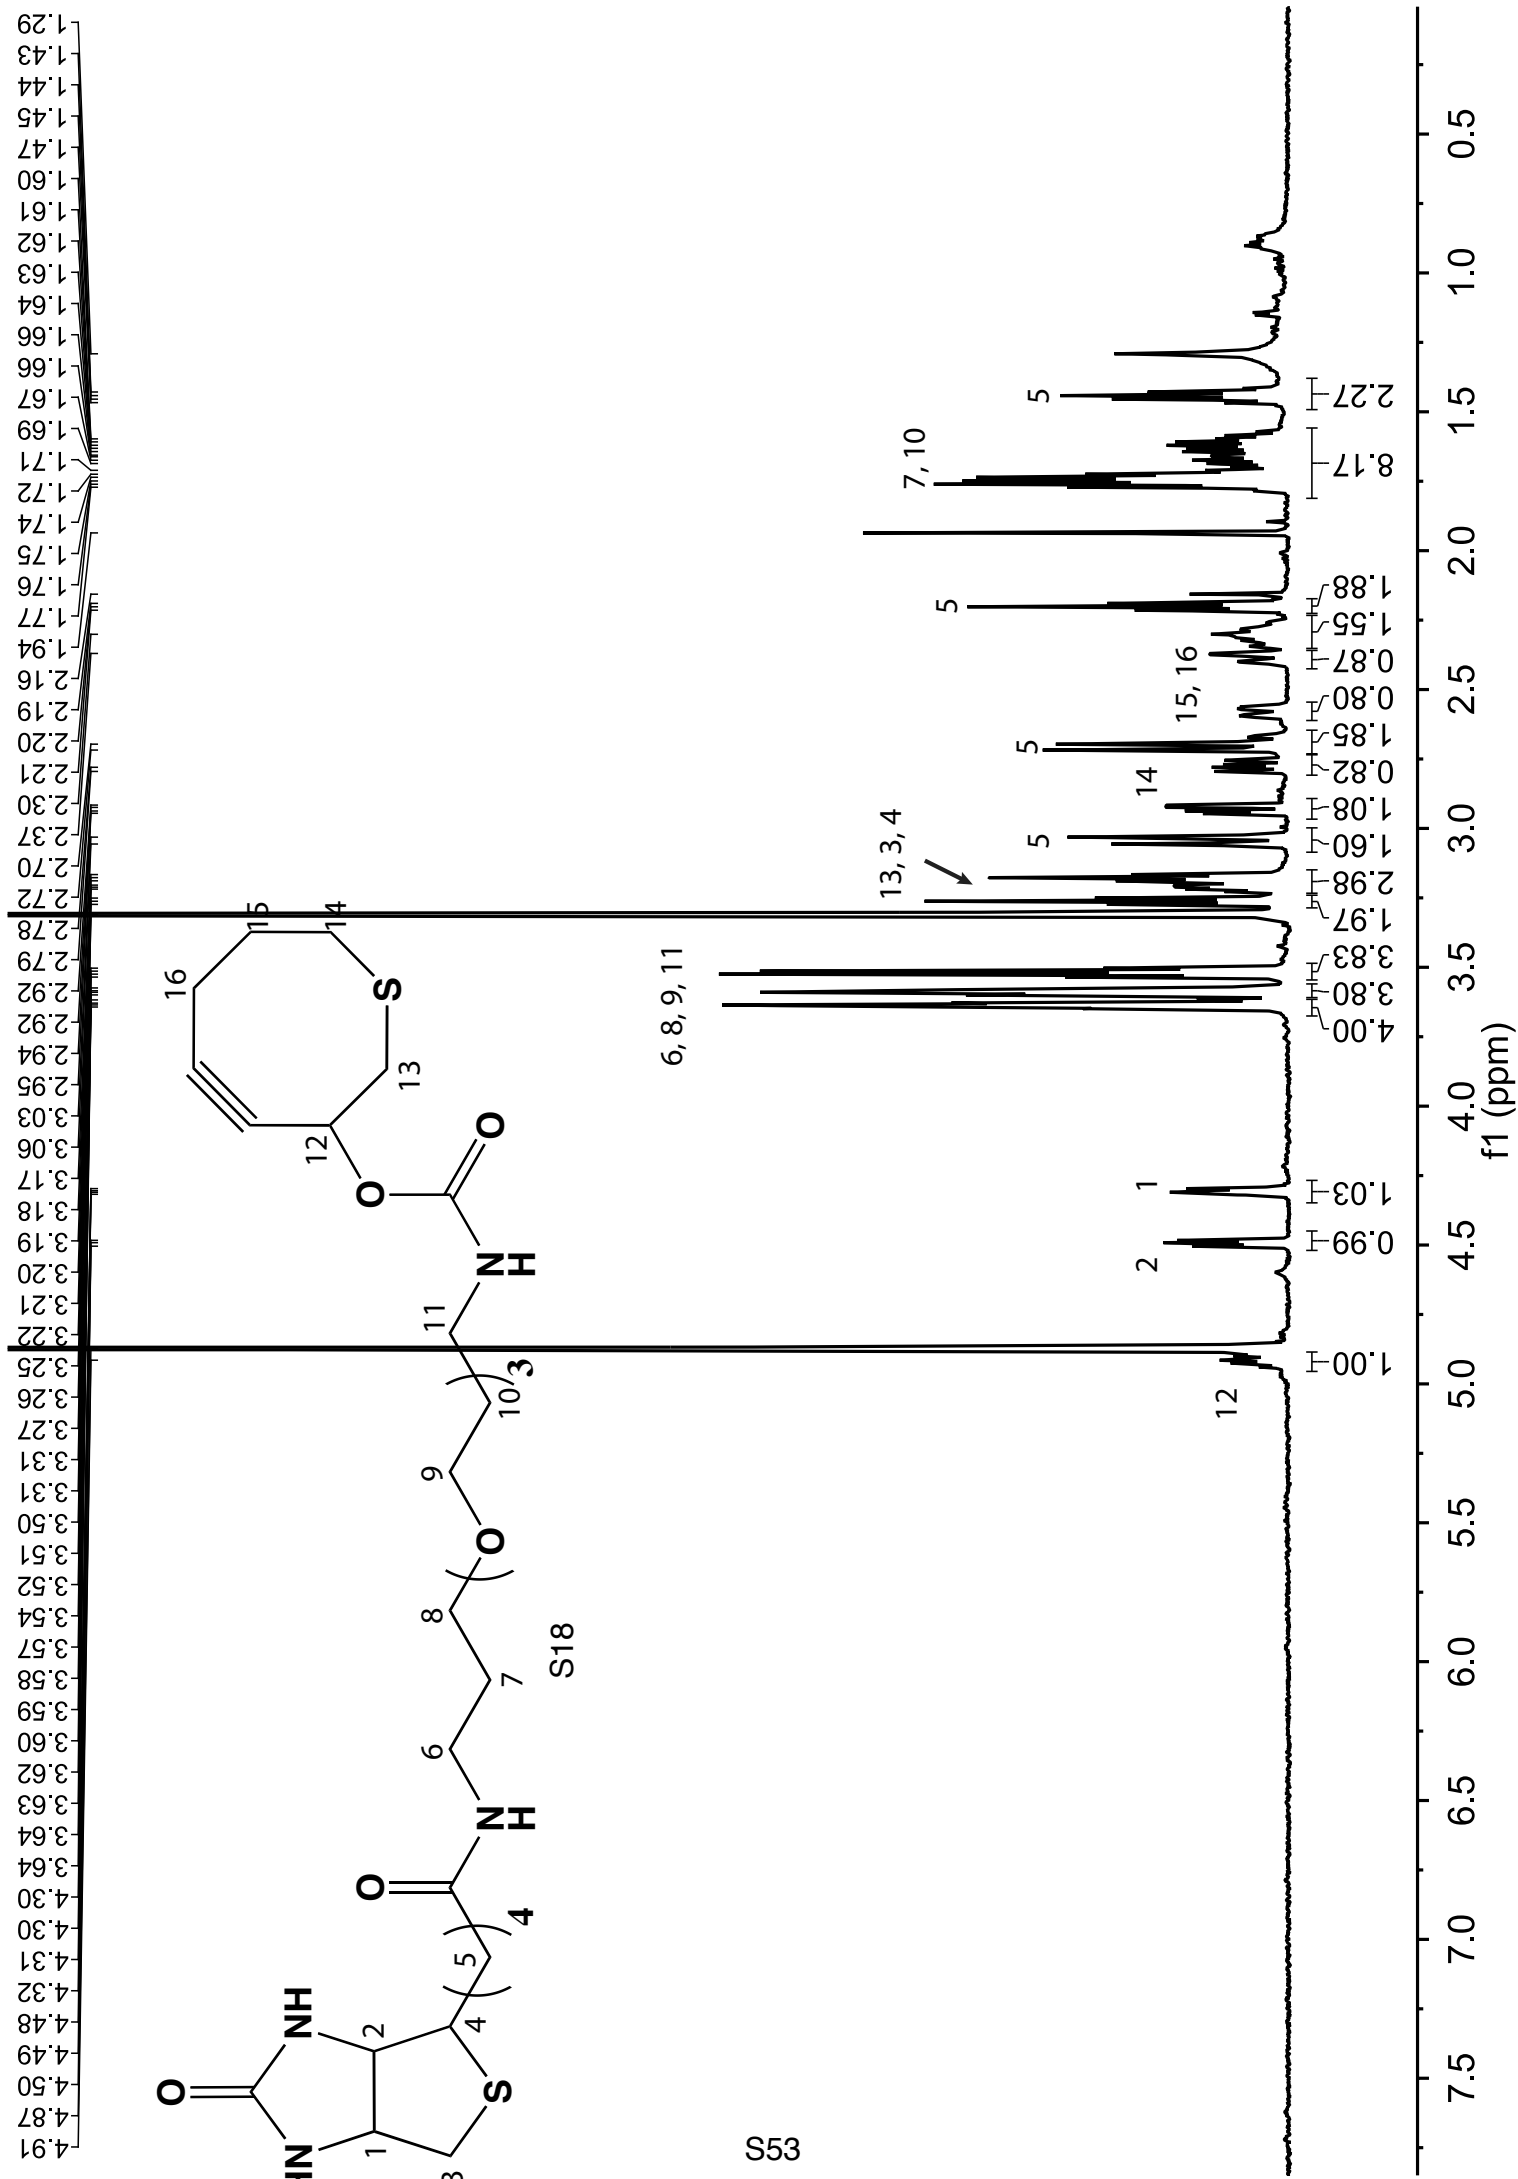

S53

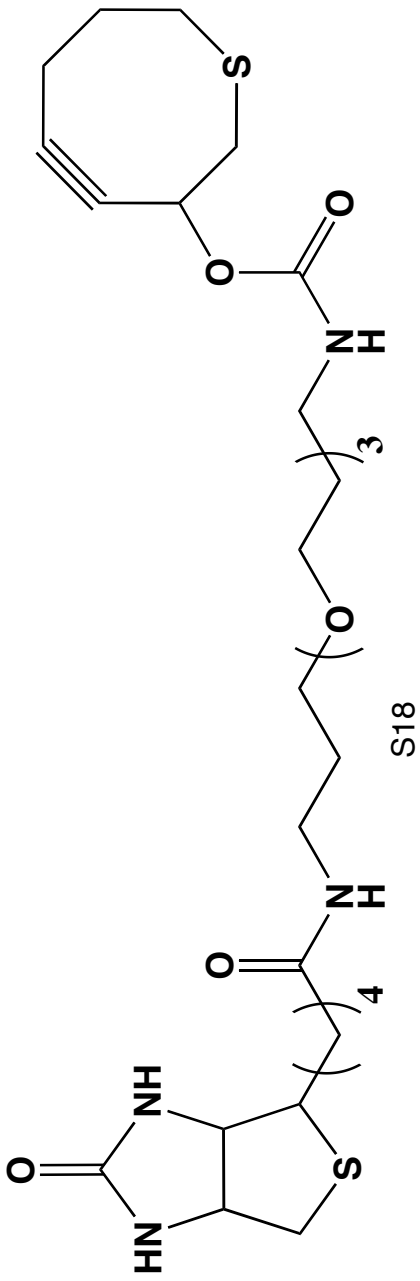

S18

22.20  
24.14  
26.44  
27.03  
29.67  
29.95  
30.58  
30.96  
37.03  
38.02  
41.20  
49.01  
49.19  
49.29  
57.16  
61.79  
63.55  
70.13  
71.40  
71.41  
71.72  
80.32  
90.28  
92.78

157.96  
166.25  
176.12

f1 (ppm)

4.132  
4.109  
3.236  
3.224  
3.214  
3.197  
3.186  
3.178  
3.168  
3.157  
3.058  
2.929  
2.888  
2.870  
2.847  
2.829  
2.798  
2.789  
2.759  
2.742  
2.716  
2.700  
2.506  
2.488  
2.476  
2.457  
2.436  
2.427  
2.415

5.814  
5.785  
5.760  
5.650  
5.626  
5.620  
5.596  
5.300

7.983  
7.471  
7.446  
7.415  
7.410  
7.392  
7.386  
7.366  
7.360  
7.335  
7.330  
7.309  
7.285  
7.280  
7.260

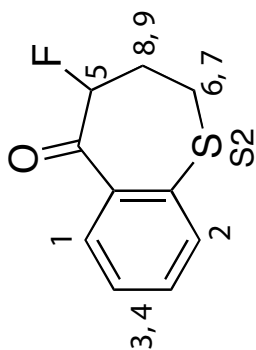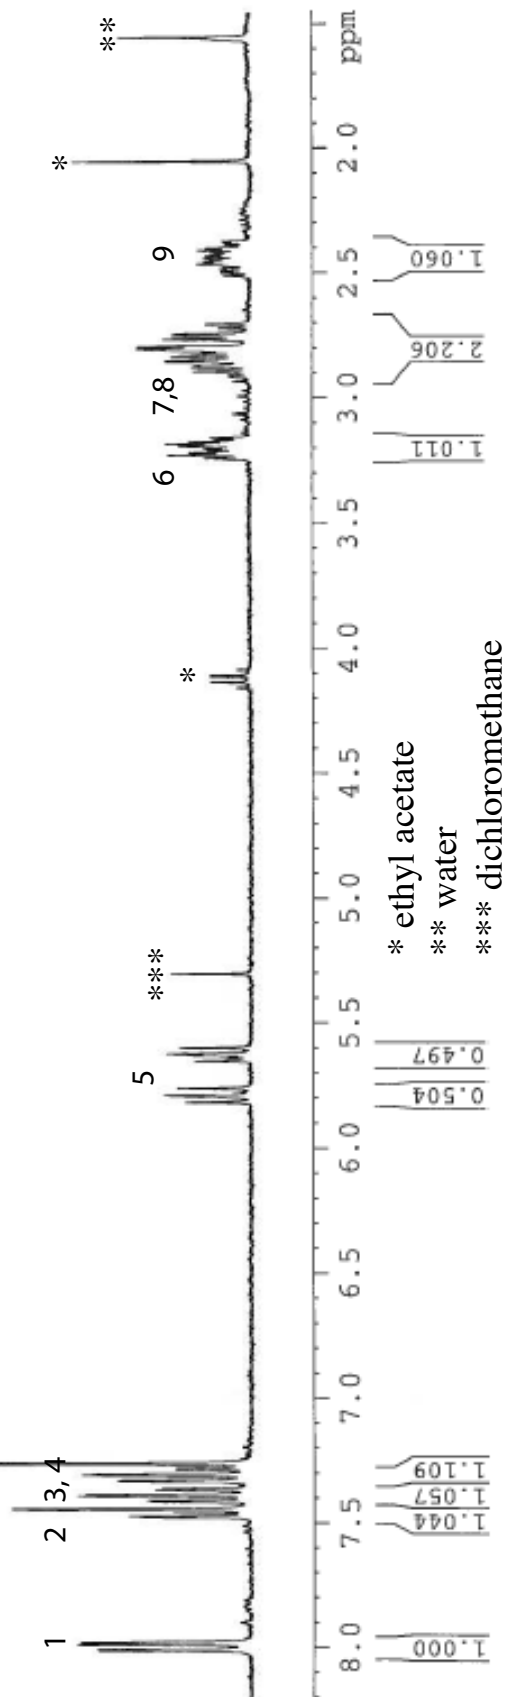

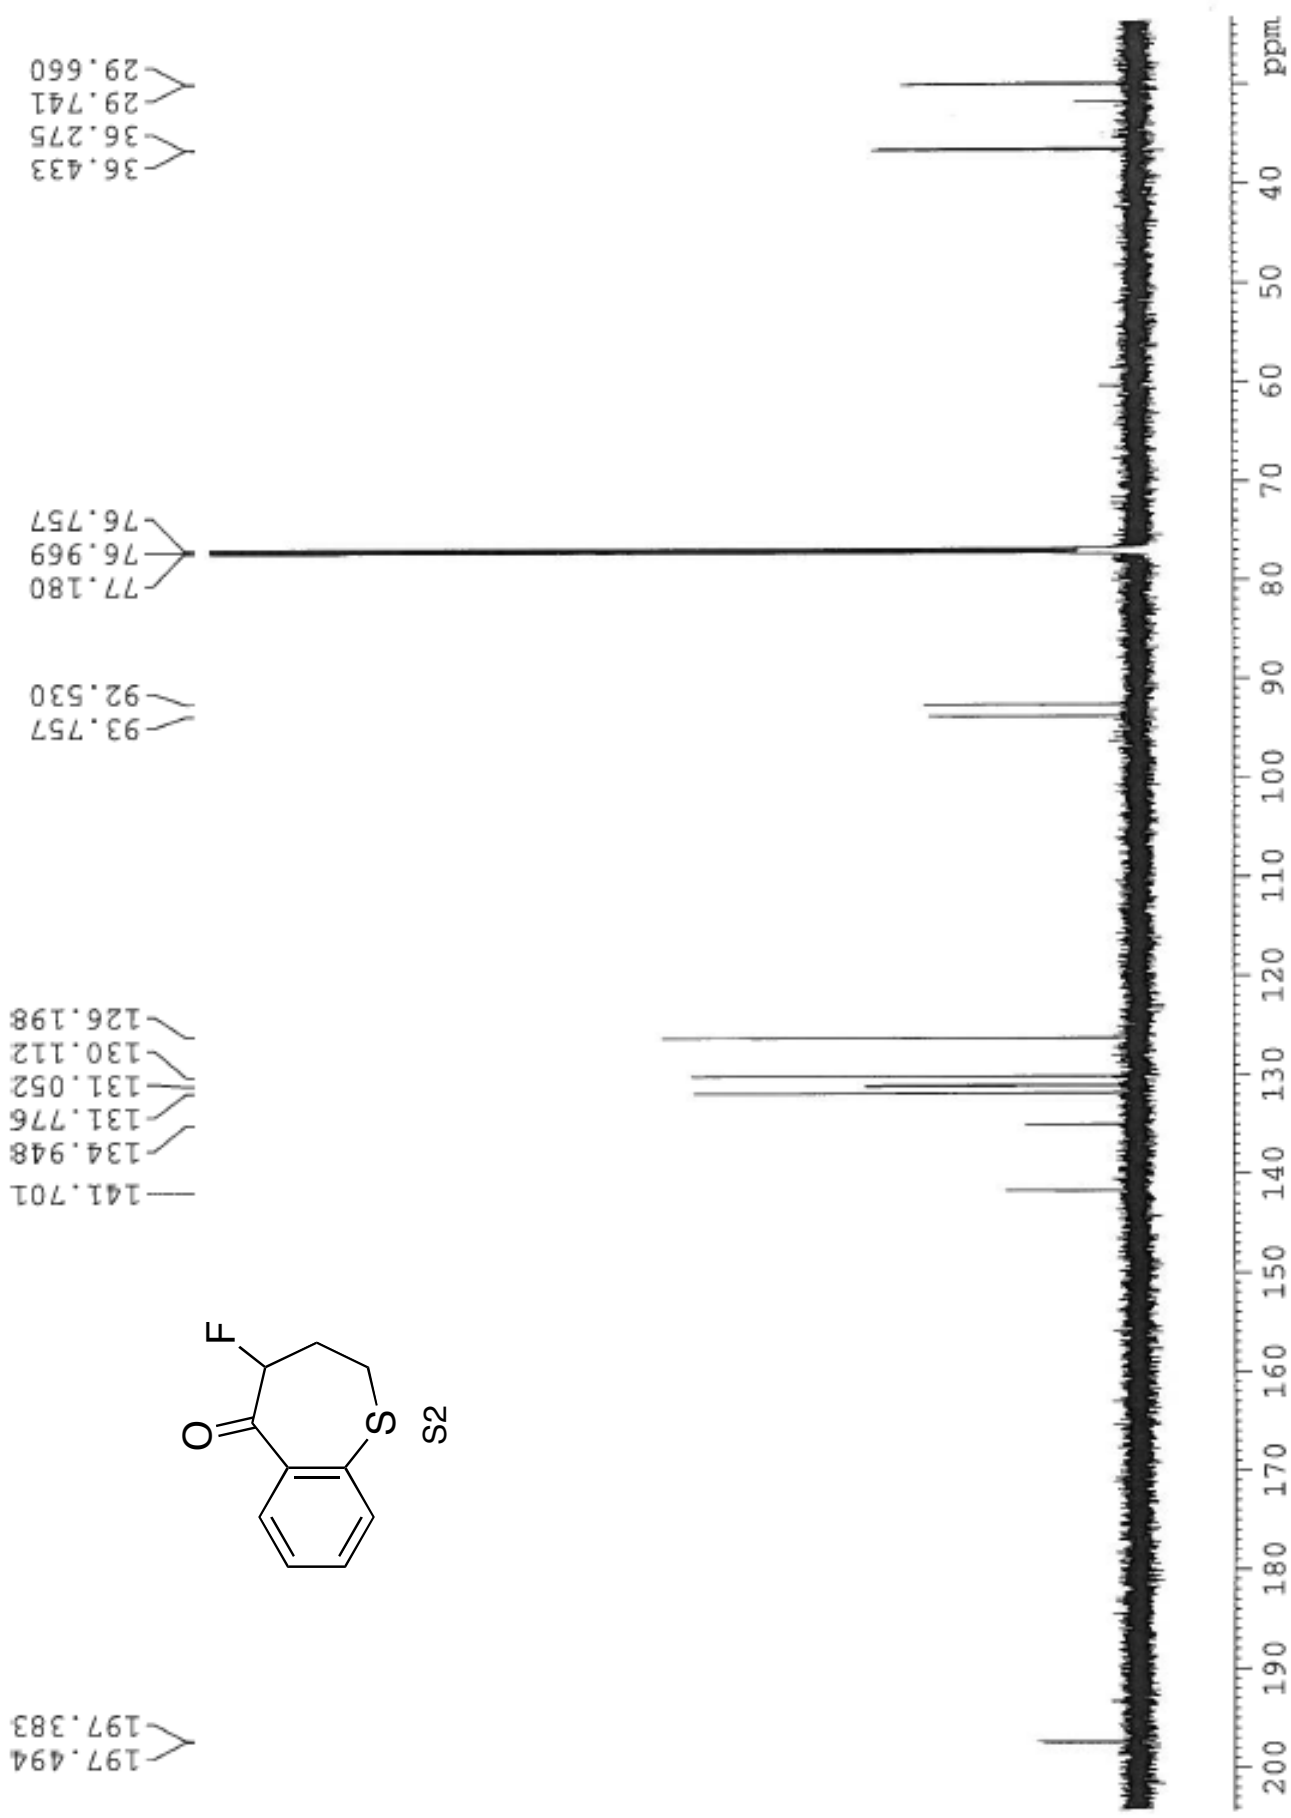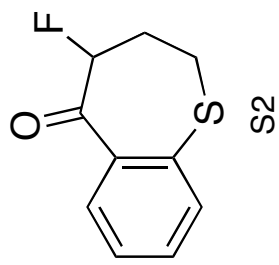

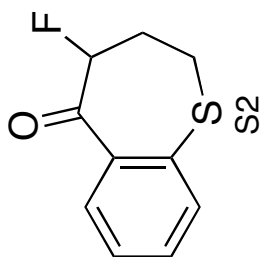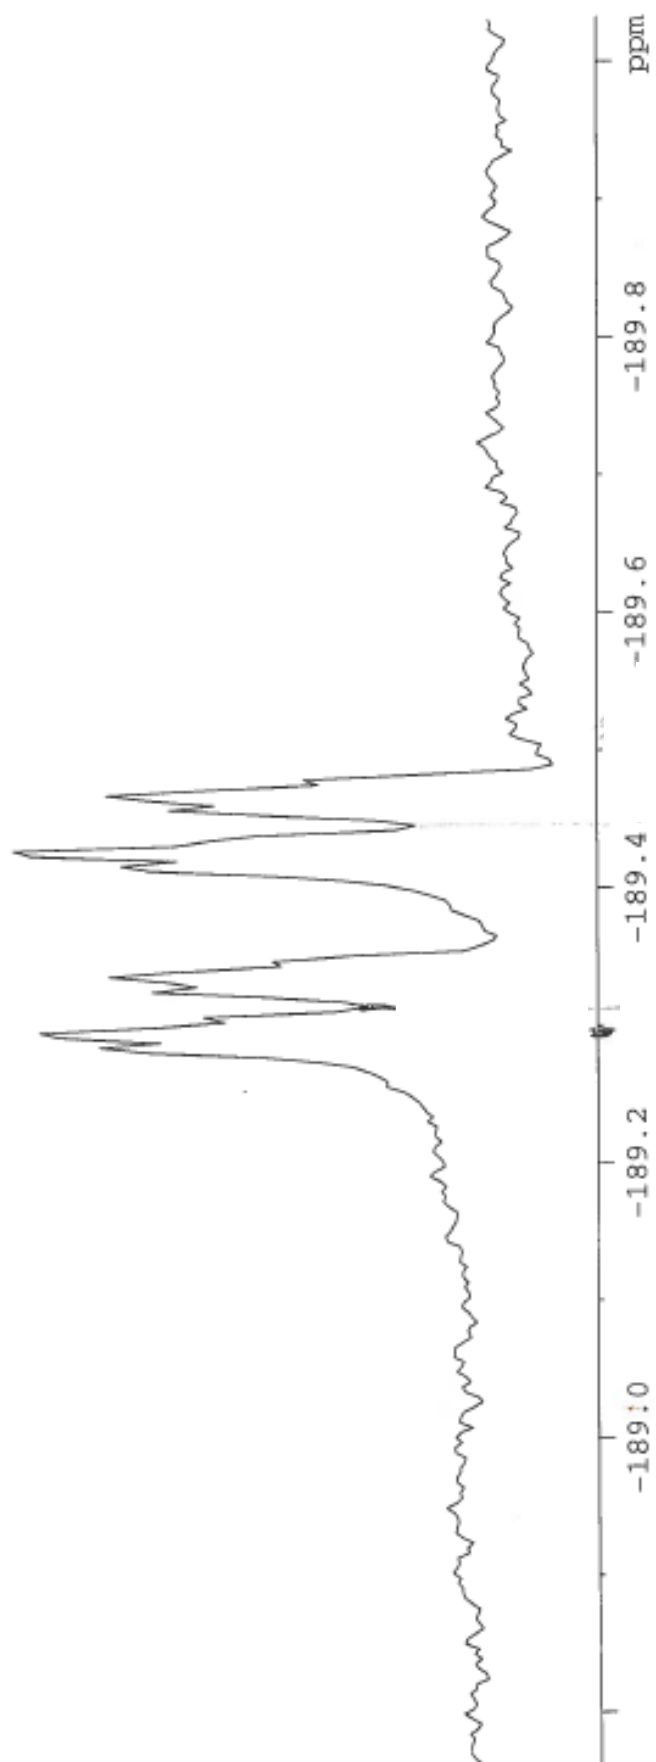

3.089  
3.079  
3.068  
2.785  
2.775  
2.761  
2.750  
2.740  
2.725

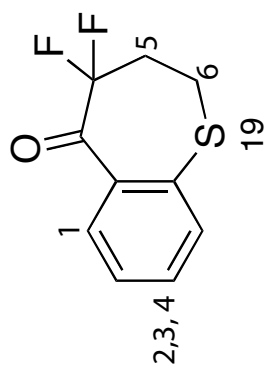

7.684  
7.670  
7.423  
7.410  
7.400  
7.388  
7.375  
7.307  
7.295  
7.283  
7.259

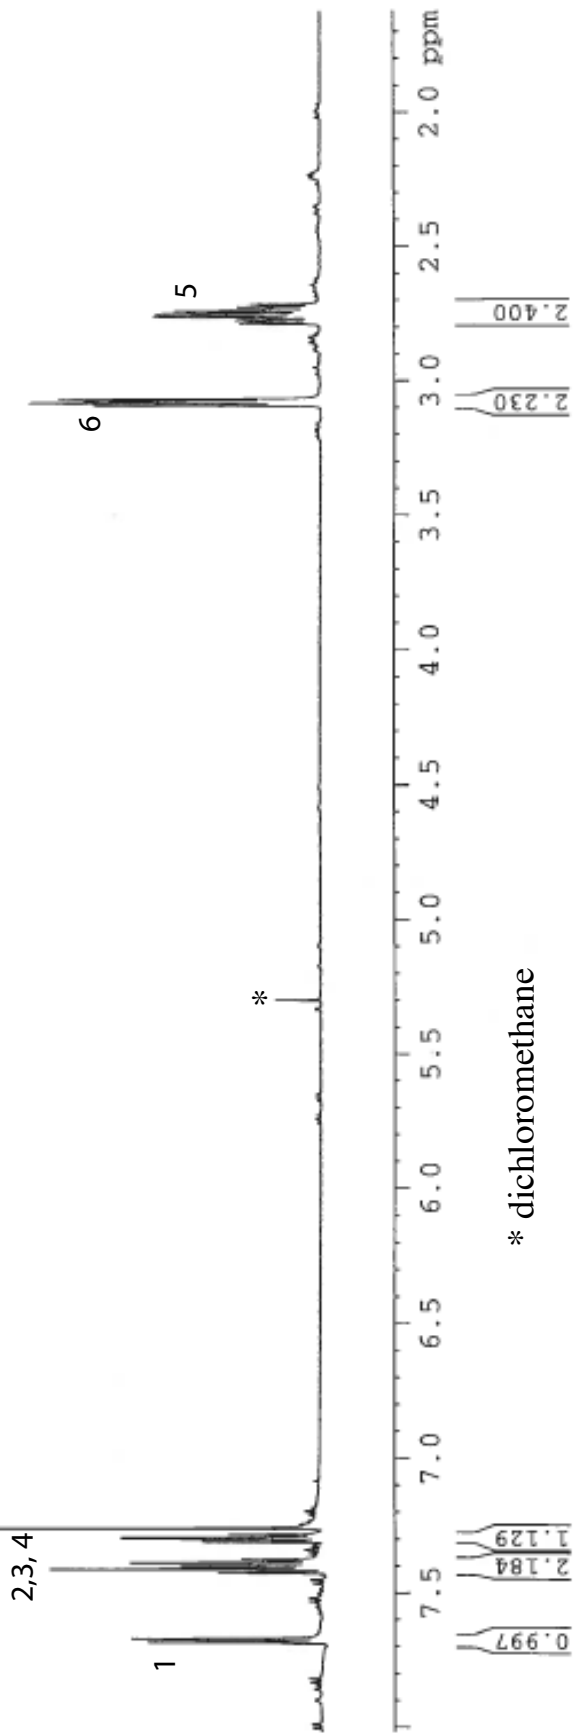

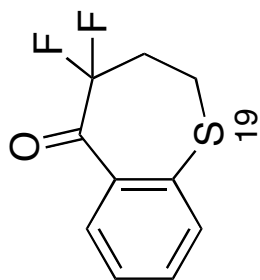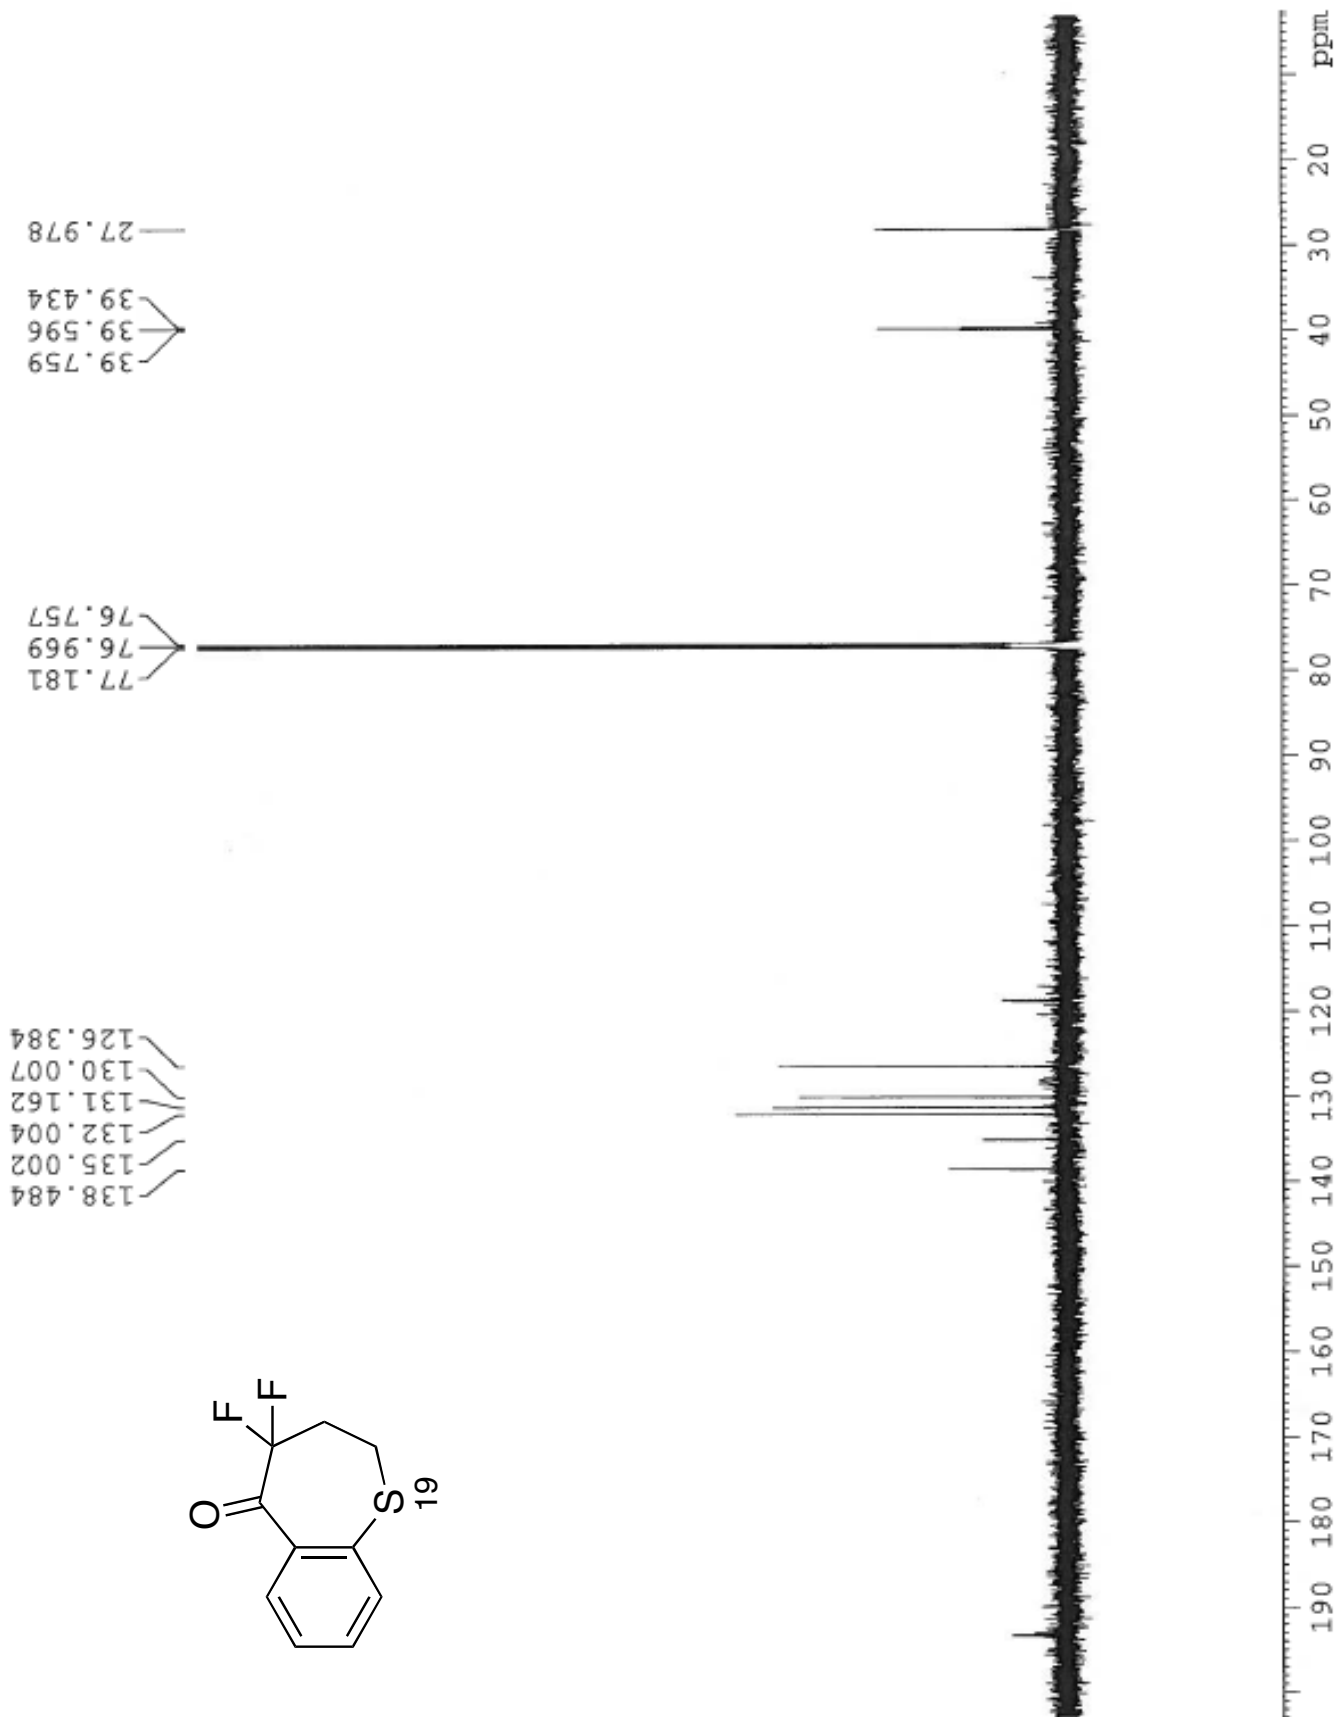

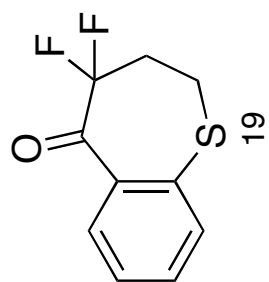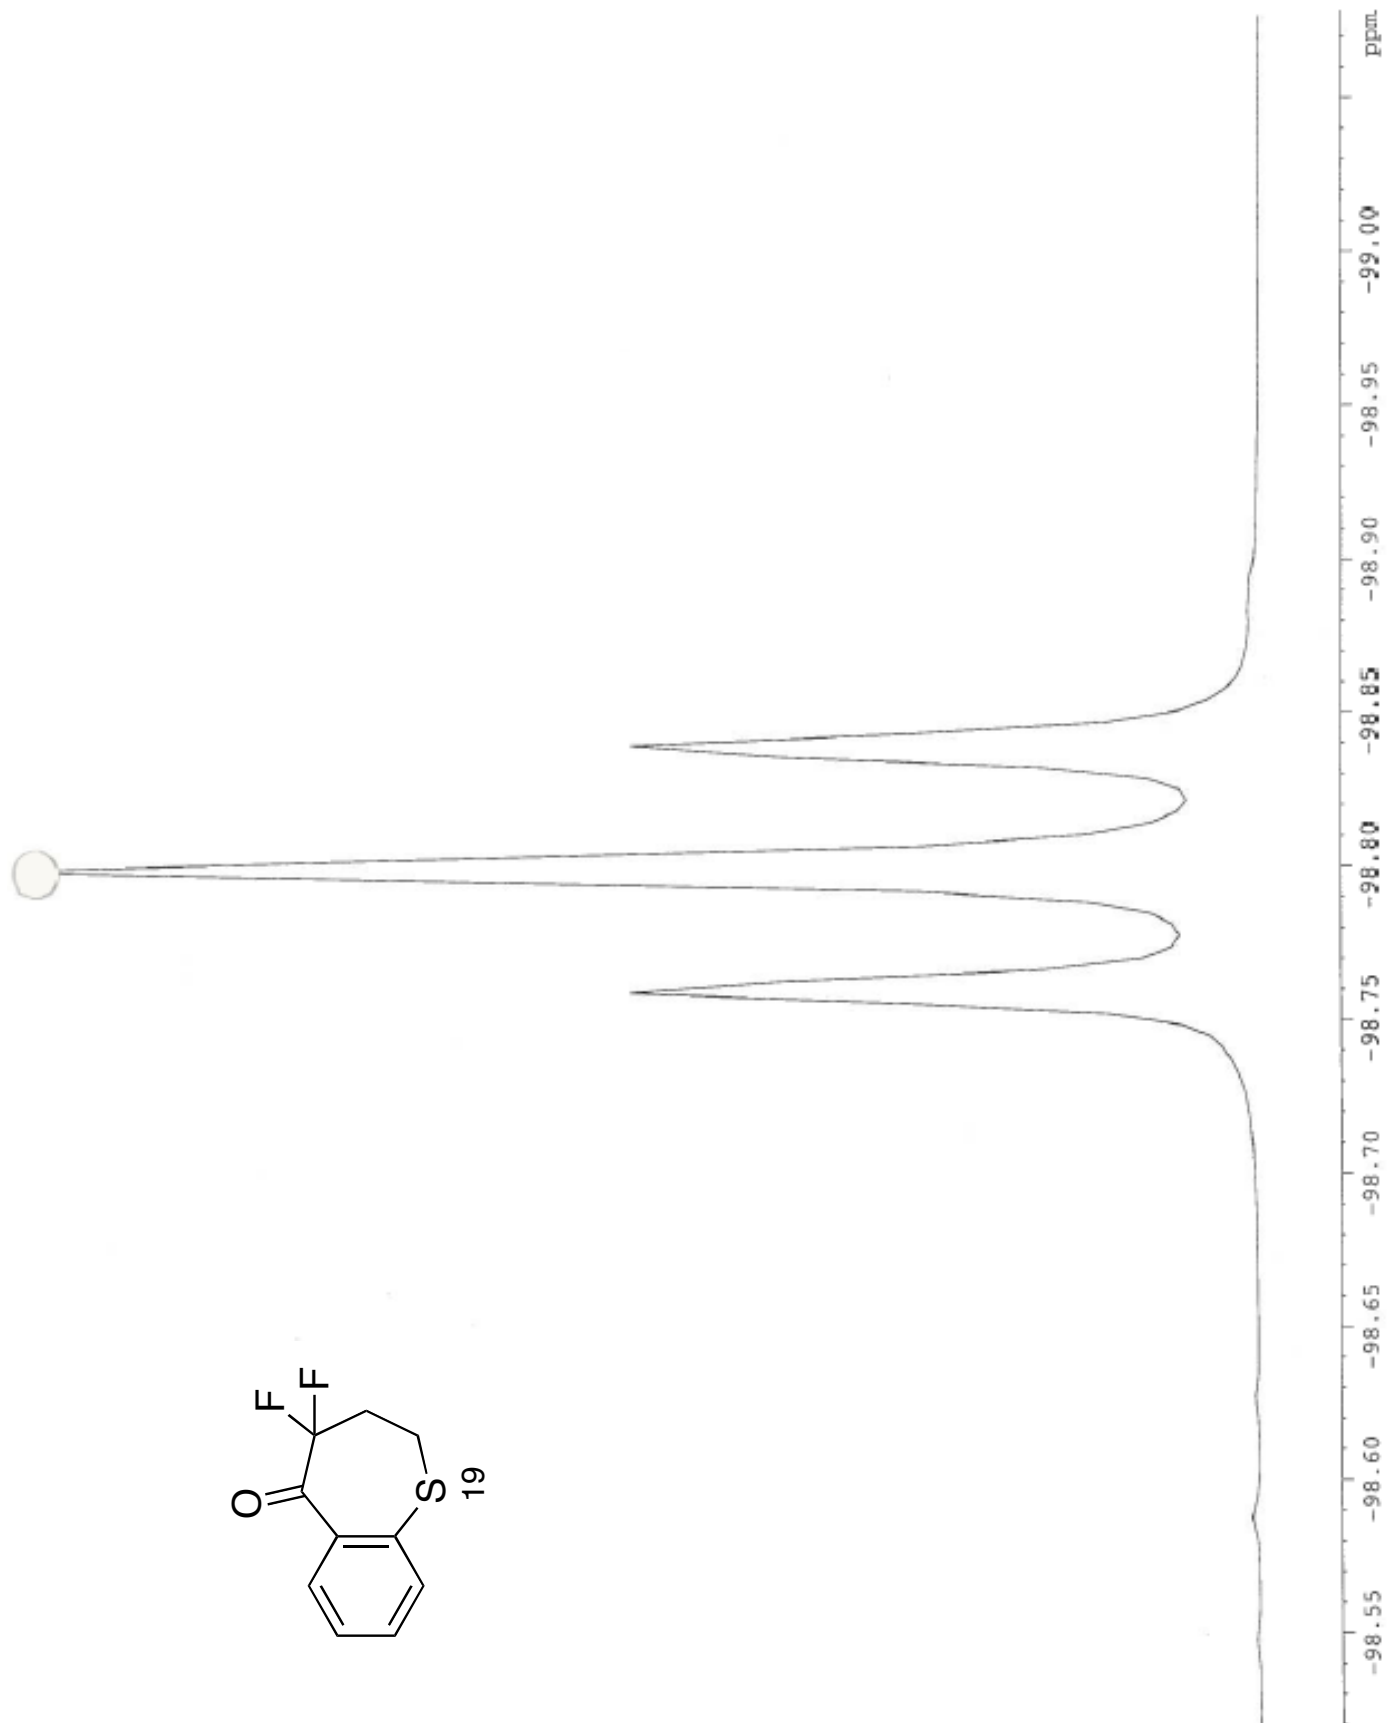



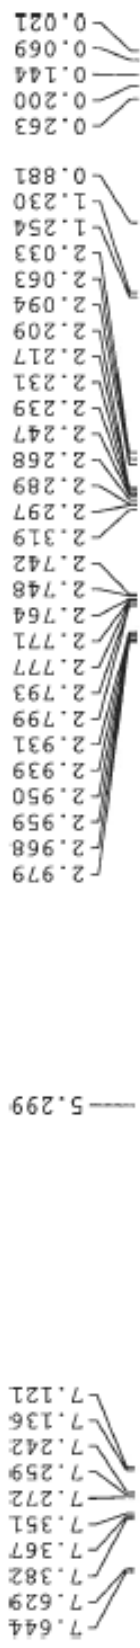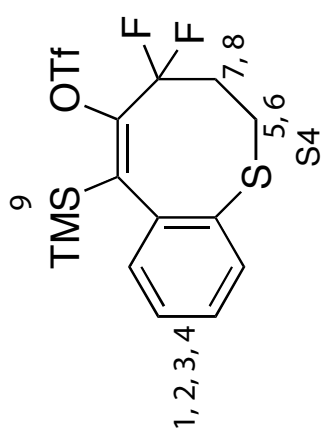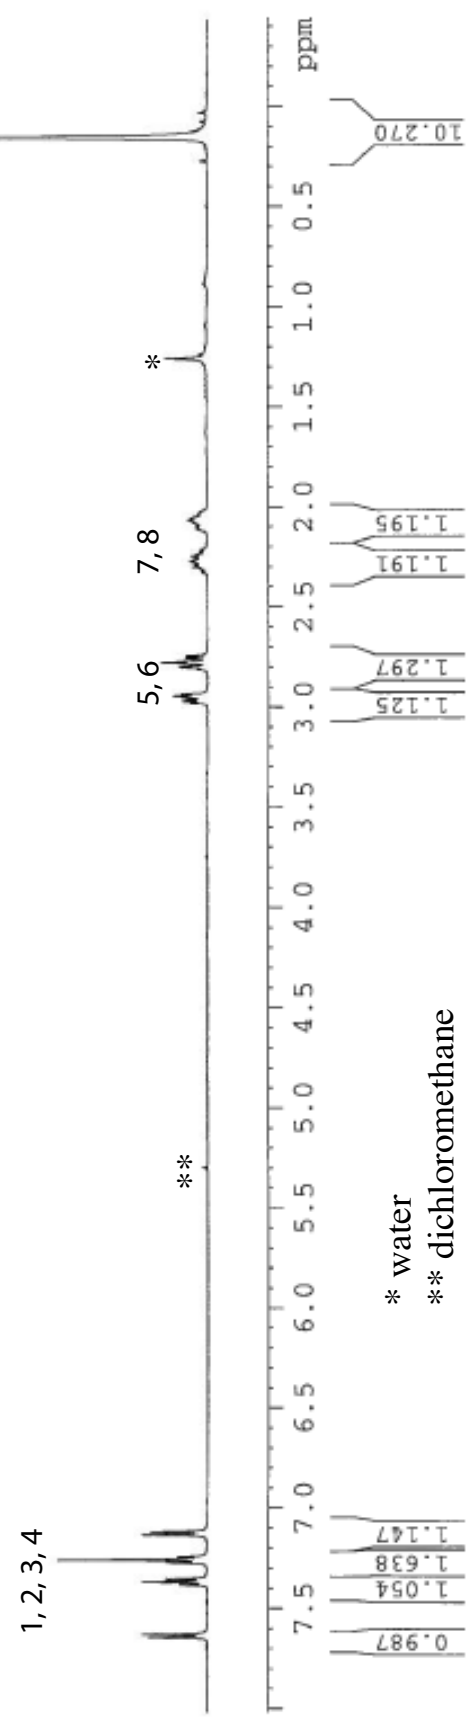

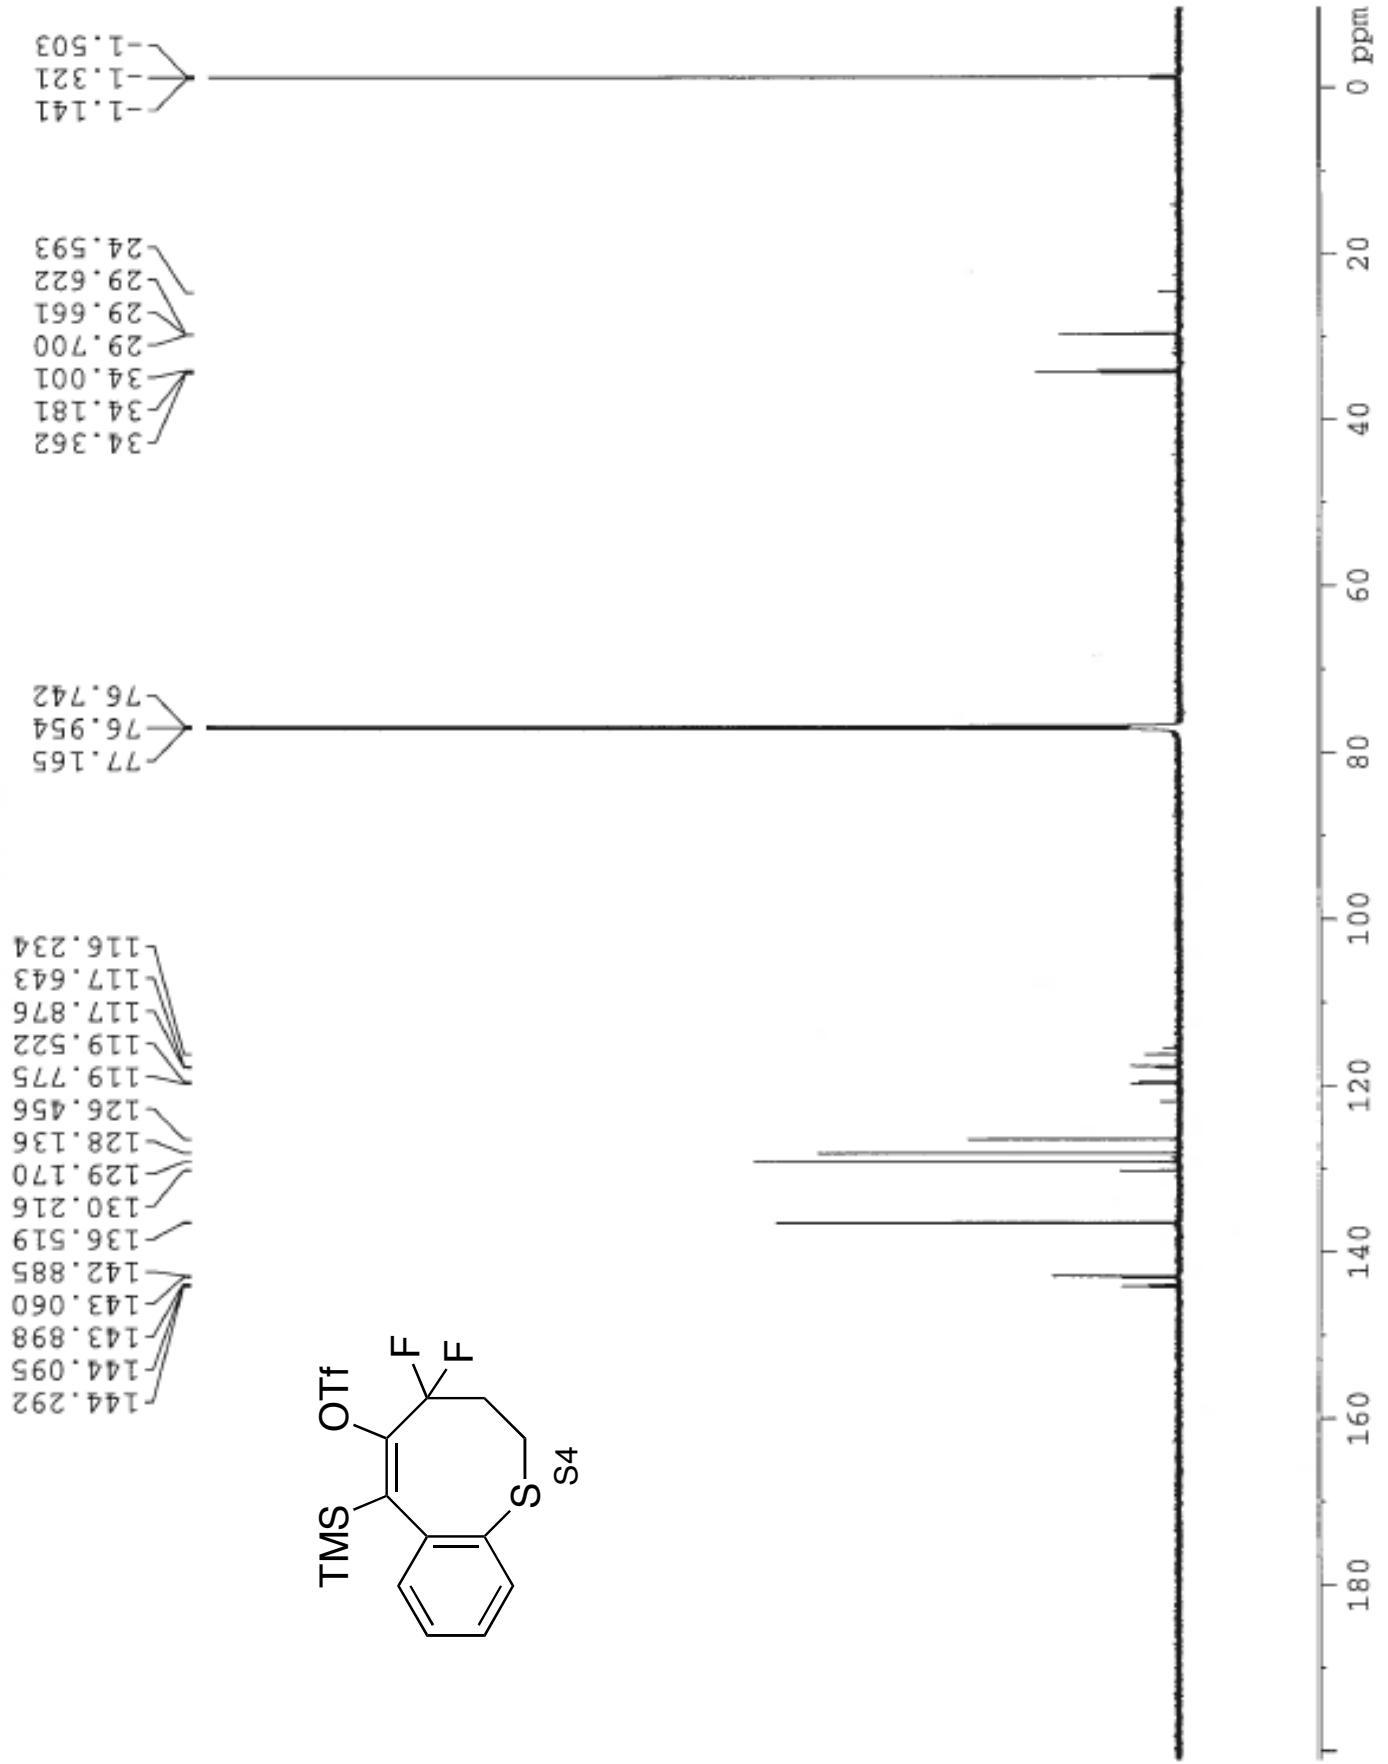

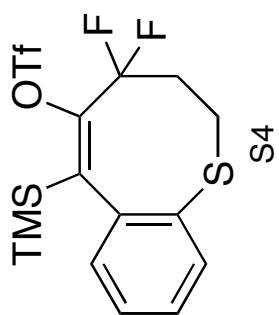

-69.28  
-69.35  
-69.57  
-69.72  
-69.74

-89.70  
-90.34  
-90.40  
-90.46  
-91.16  
-91.89

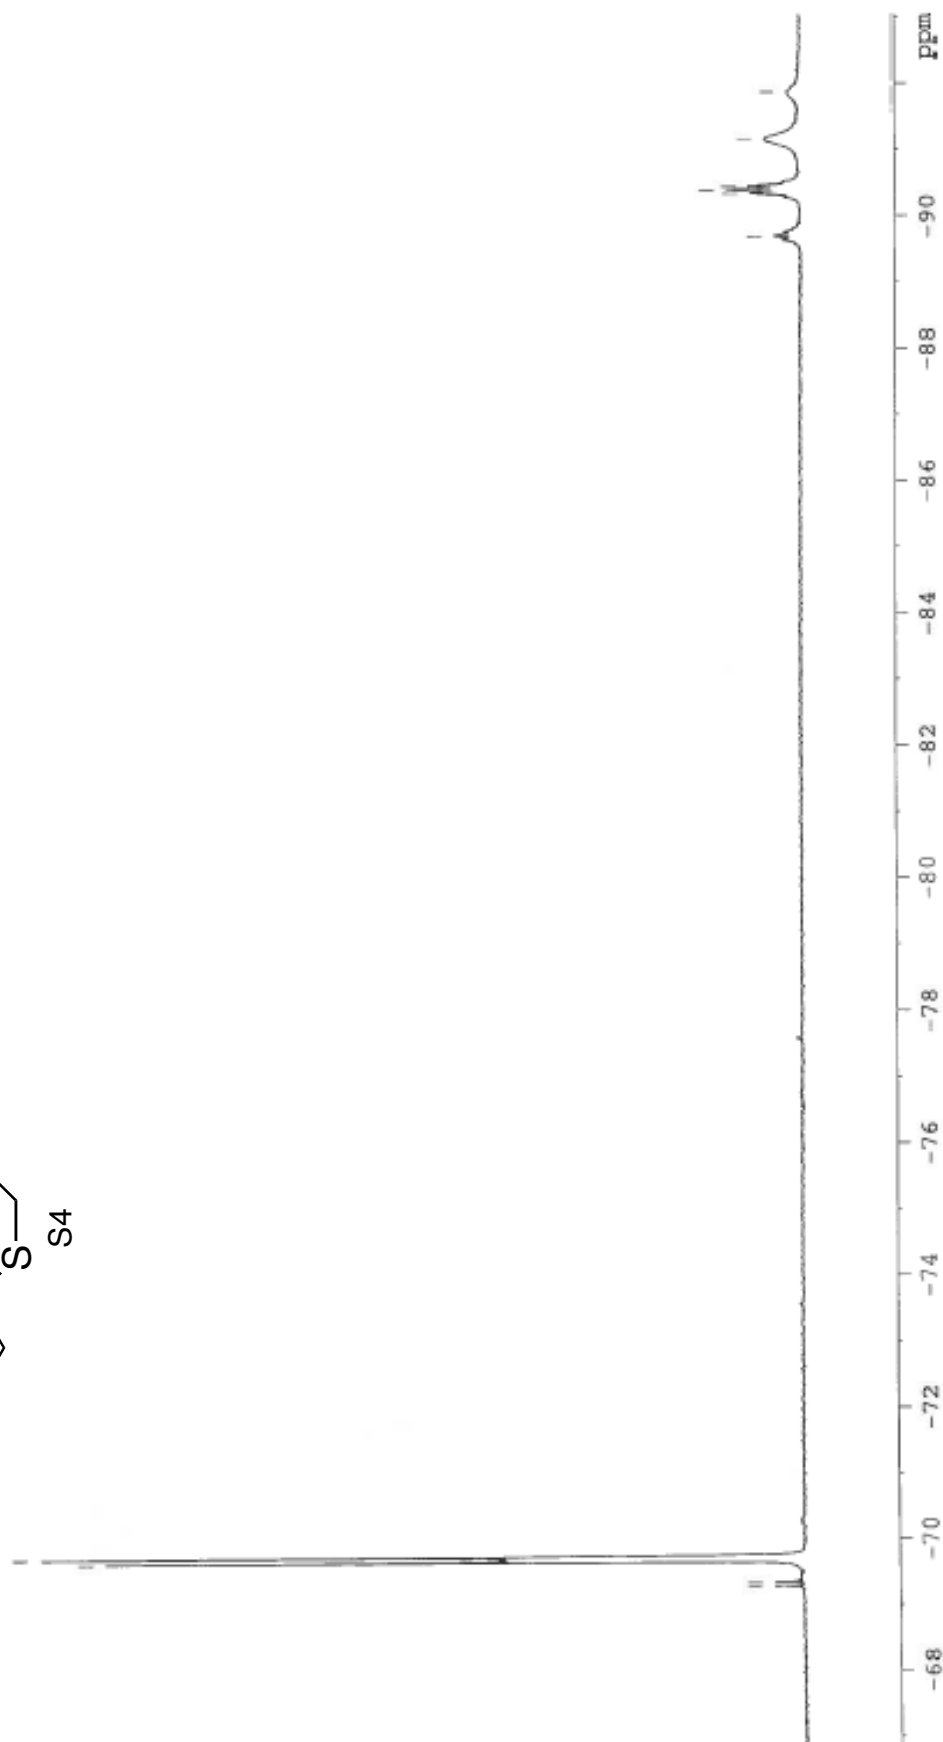

3.577  
 3.385  
 3.255  
 3.173  
 3.167  
 3.159  
 2.856  
 2.848  
 2.840  
 2.832  
 2.824  
 2.816  
 2.808  
 2.801  
 2.793  
 2.176  
 2.091  
 2.055  
 1.969  
 1.953  
 1.949  
 1.945  
 1.940  
 1.936  
 1.830  
 1.551  
 1.272  
 1.093  
 0.886

5.452

7.464  
 7.451  
 7.417  
 7.406  
 7.404  
 7.394  
 7.391  
 7.352  
 7.340  
 7.327

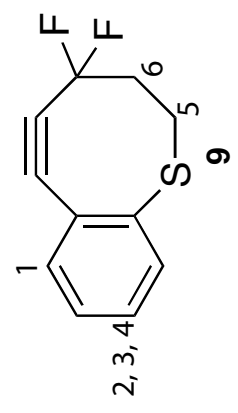

1, 2, 3, 4

5 6

\*

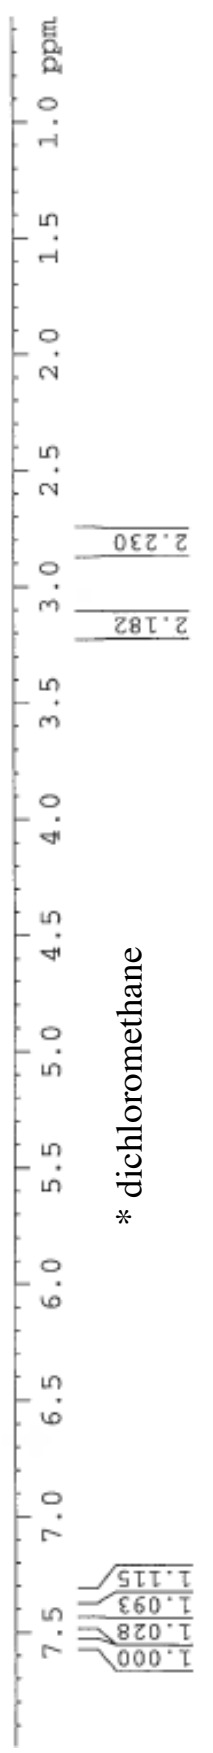

\* dichloromethane

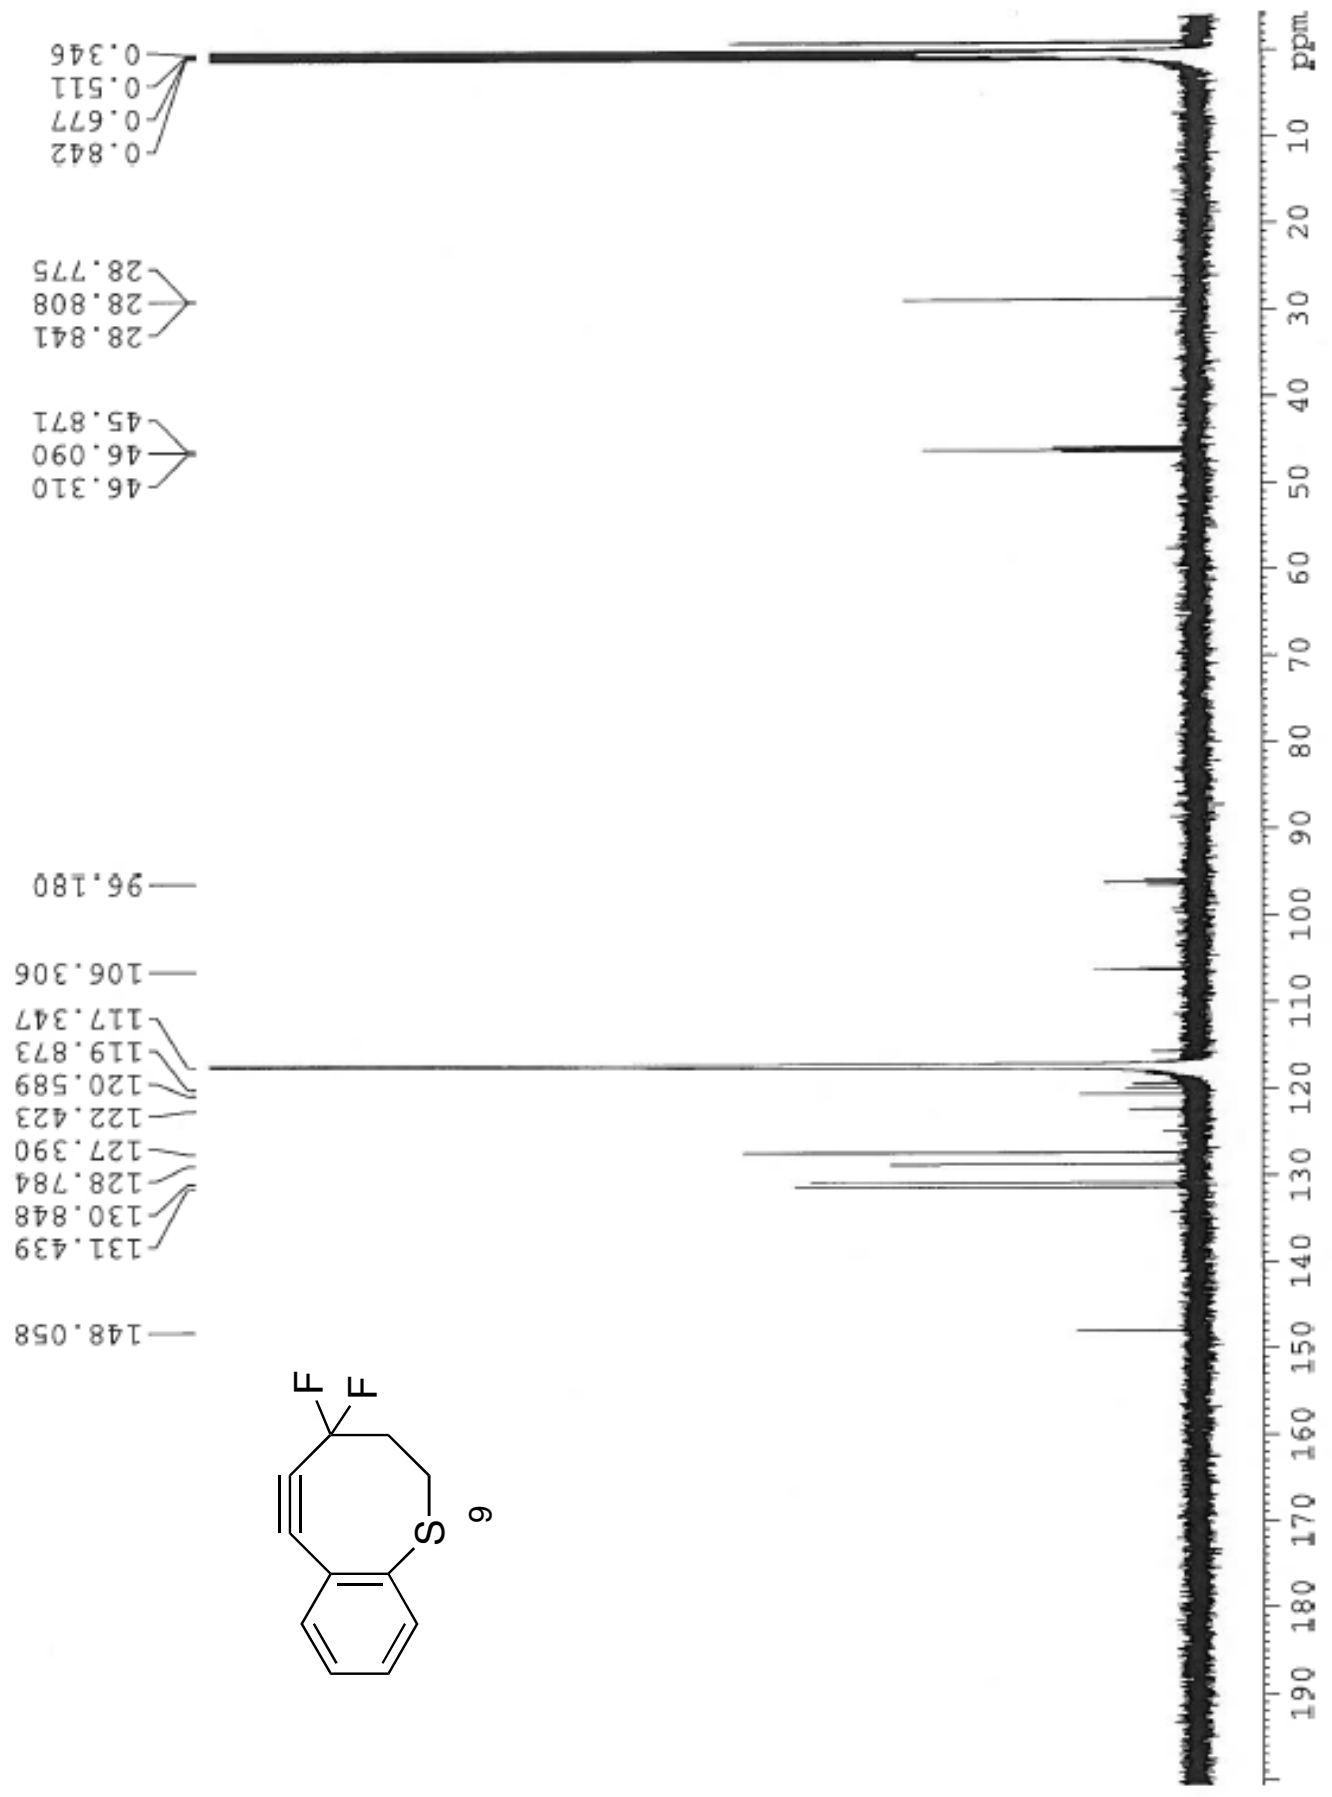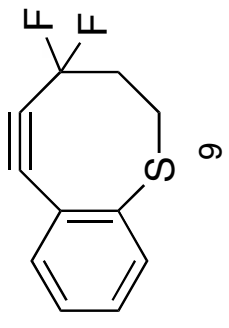

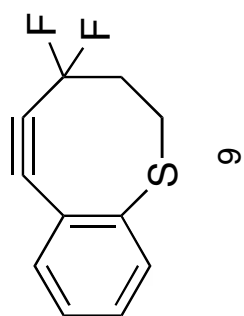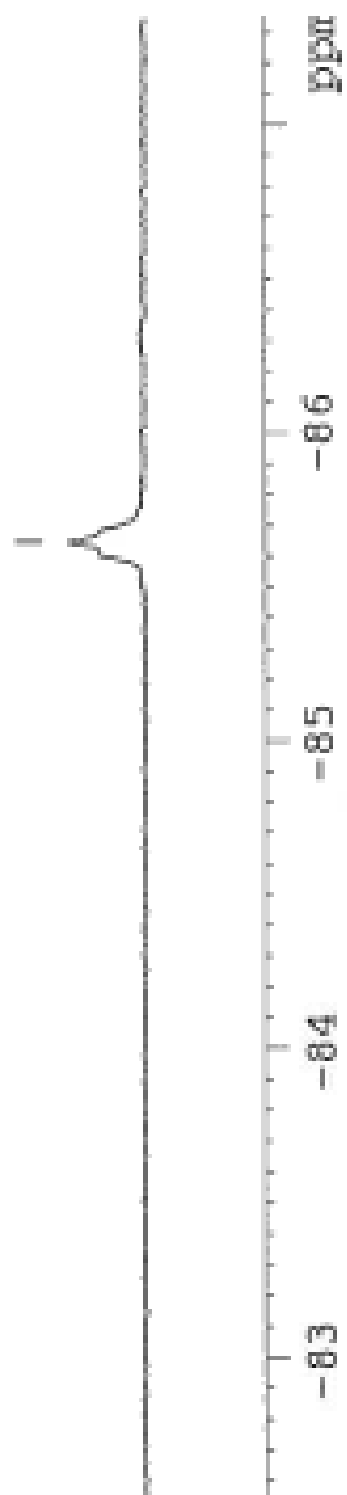

1H starting parameters (zg30)  
 DRX-500 zBBO probe

7.835  
7.820  
7.817  
7.817  
7.671  
7.655  
7.653  
7.641  
7.594  
7.590  
7.578  
7.576  
7.563  
7.444  
7.431  
7.416  
7.400  
7.386  
7.378  
7.361  
7.227

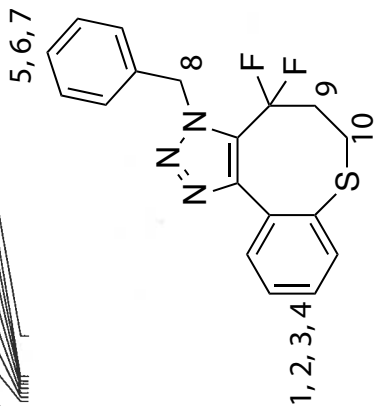

3.060  
3.048  
3.036  
2.881  
2.410

1, 2, 3, 4, 5, 6, 7

8

10

9

1.94

1.10

1.05

4.91

2.00

2.08

2.26

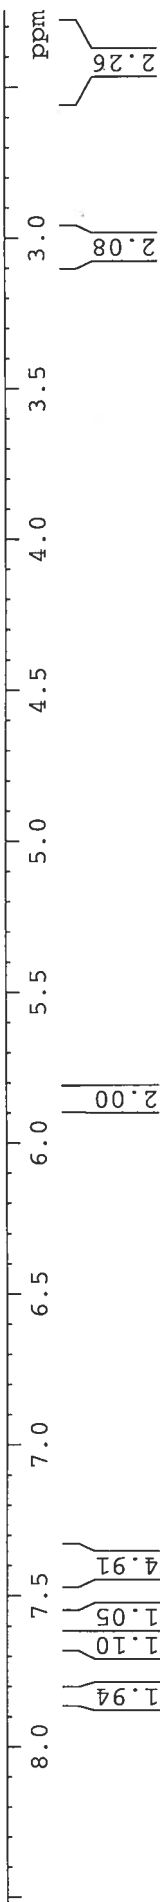

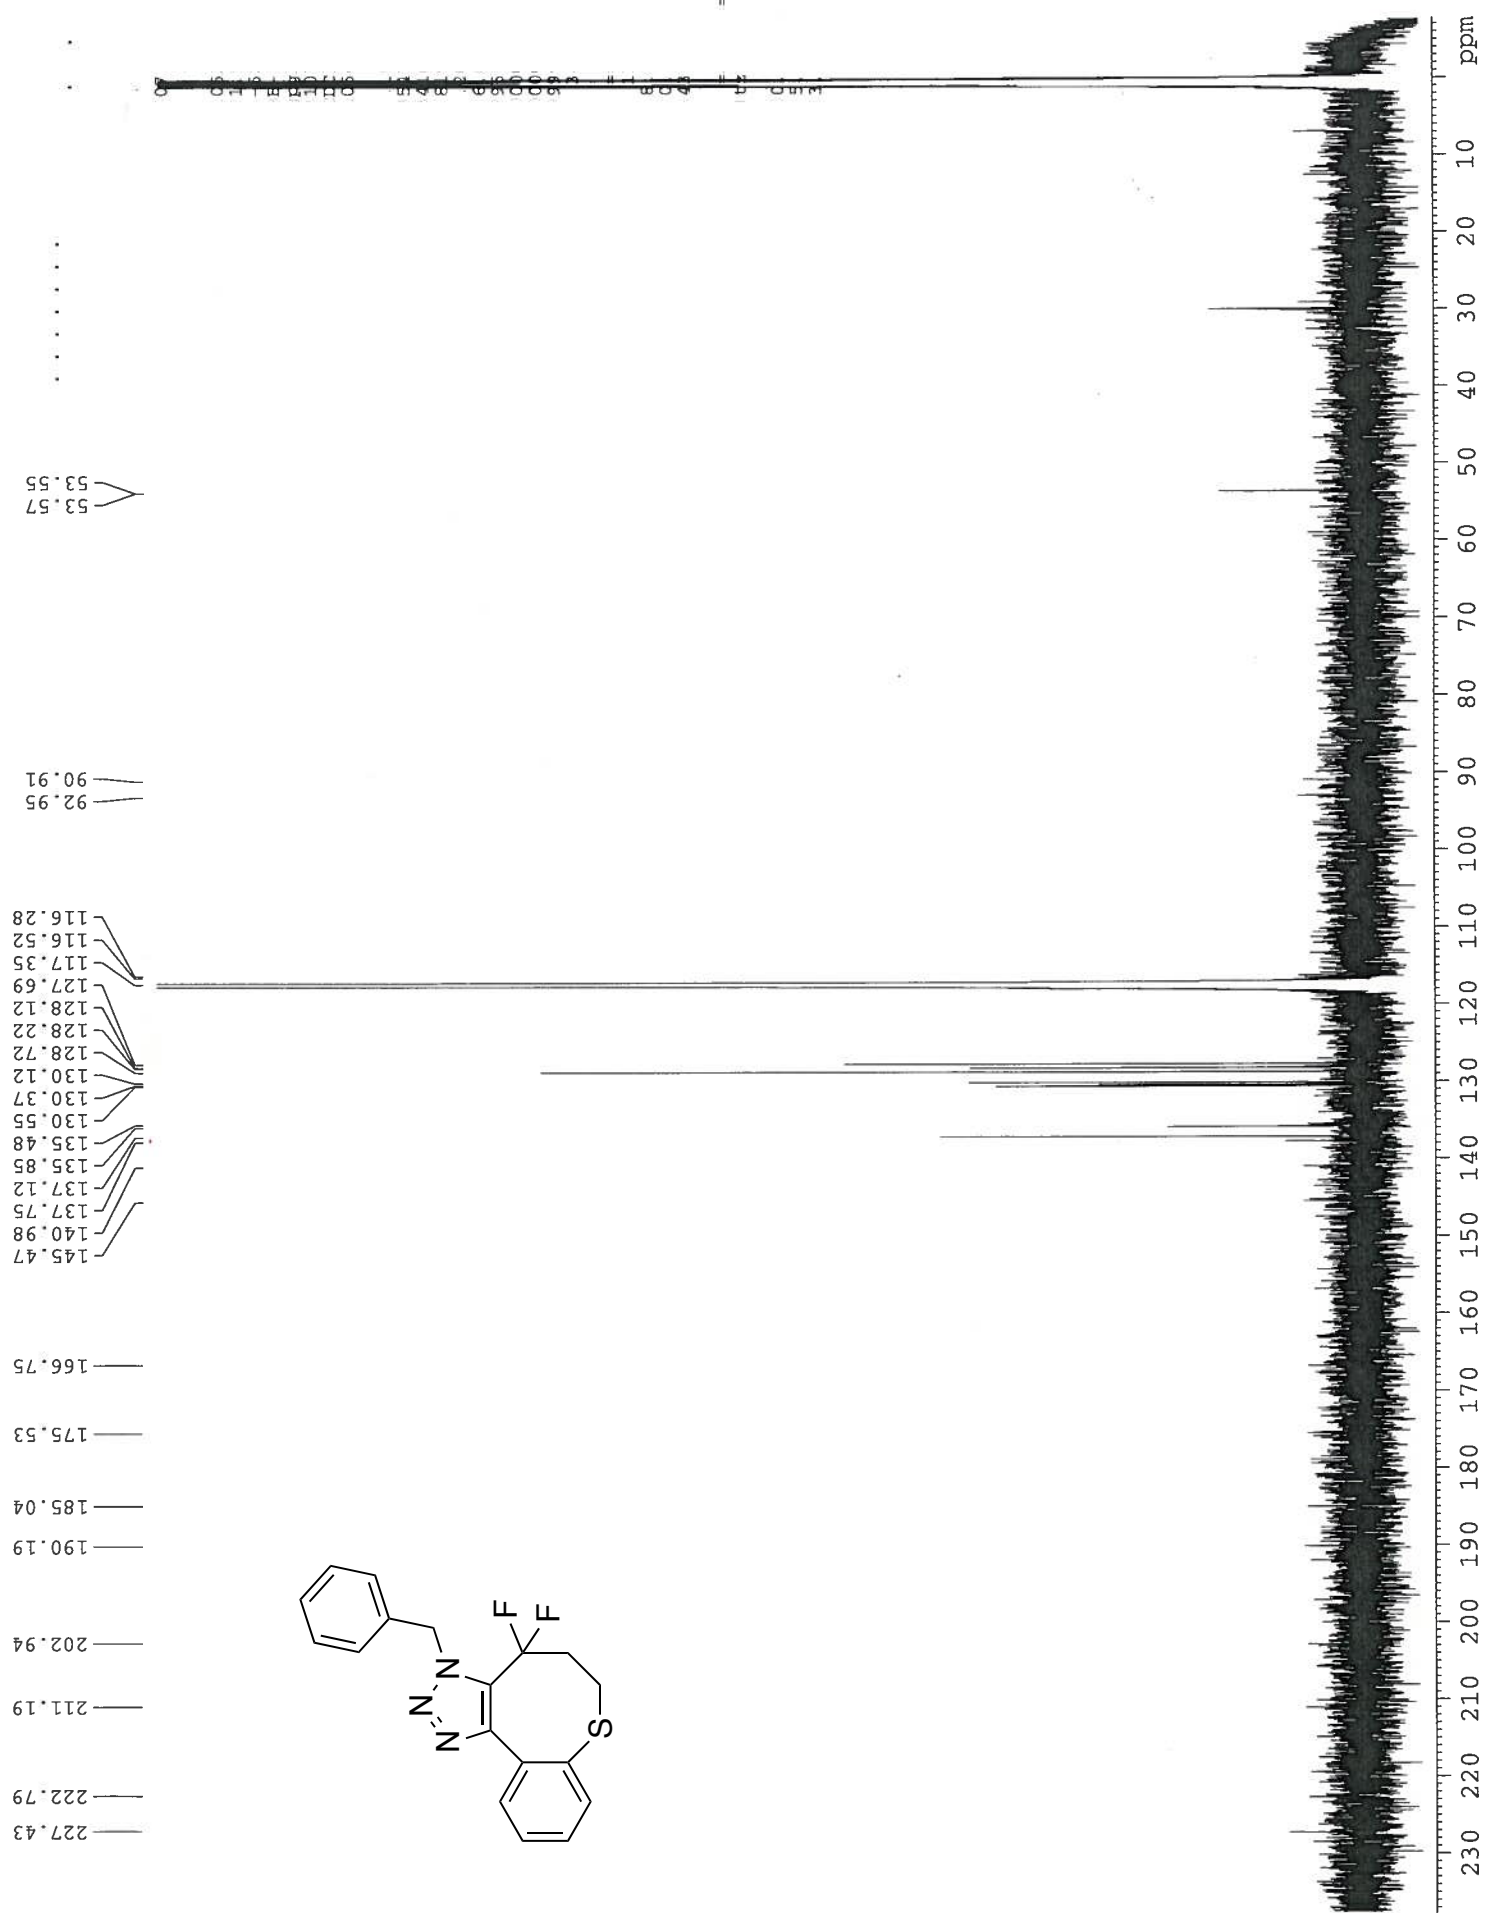



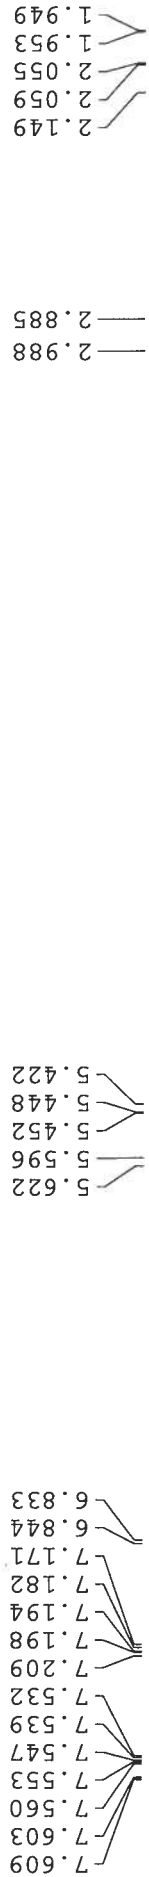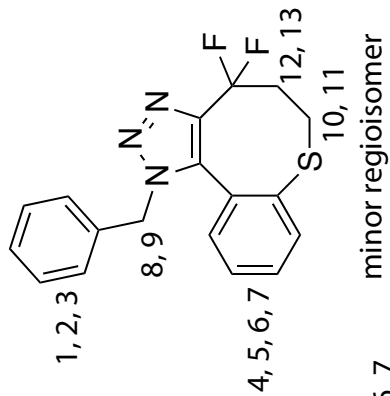

695

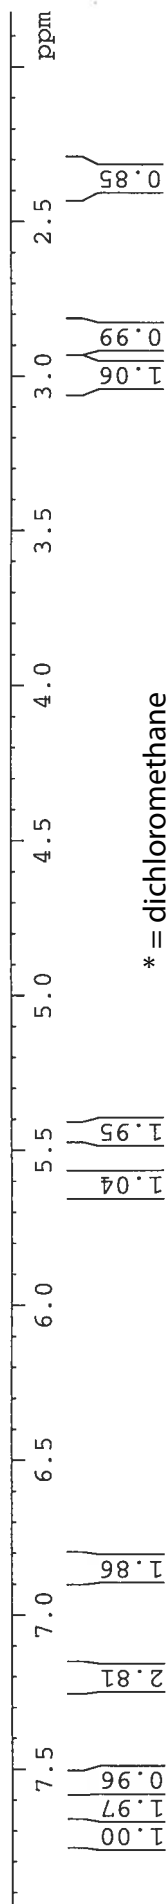

\* = dichloromethane

12/21/10 CC AV-600 Z80 carbon starting parameters  
AQ\_MOD=DQD

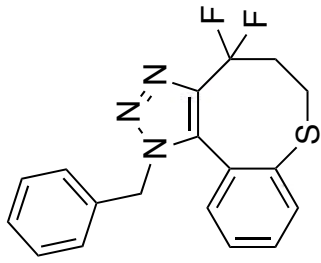

117.24

128.45  
127.95  
127.30

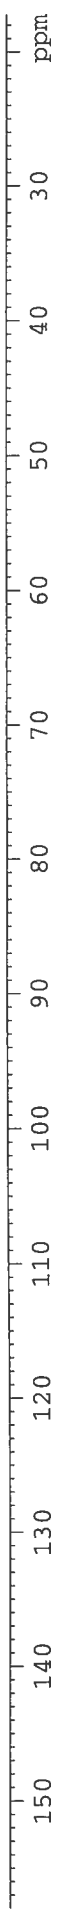

1.268

2.812

7.258

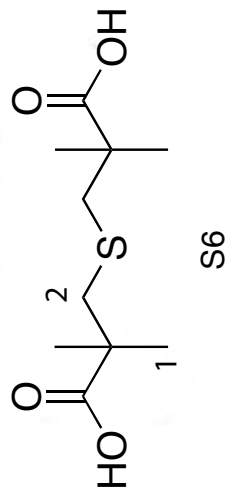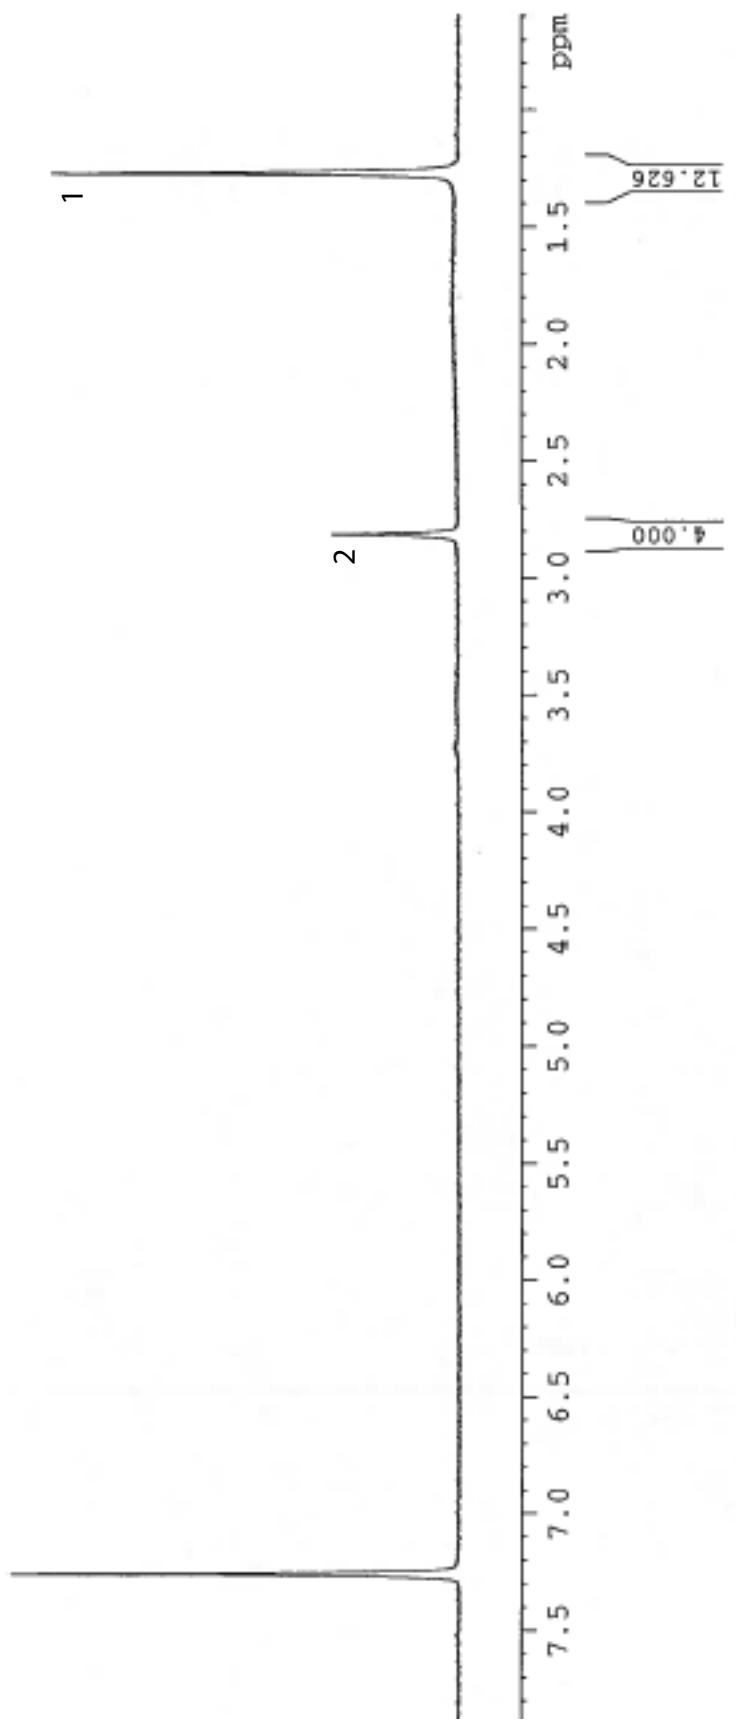

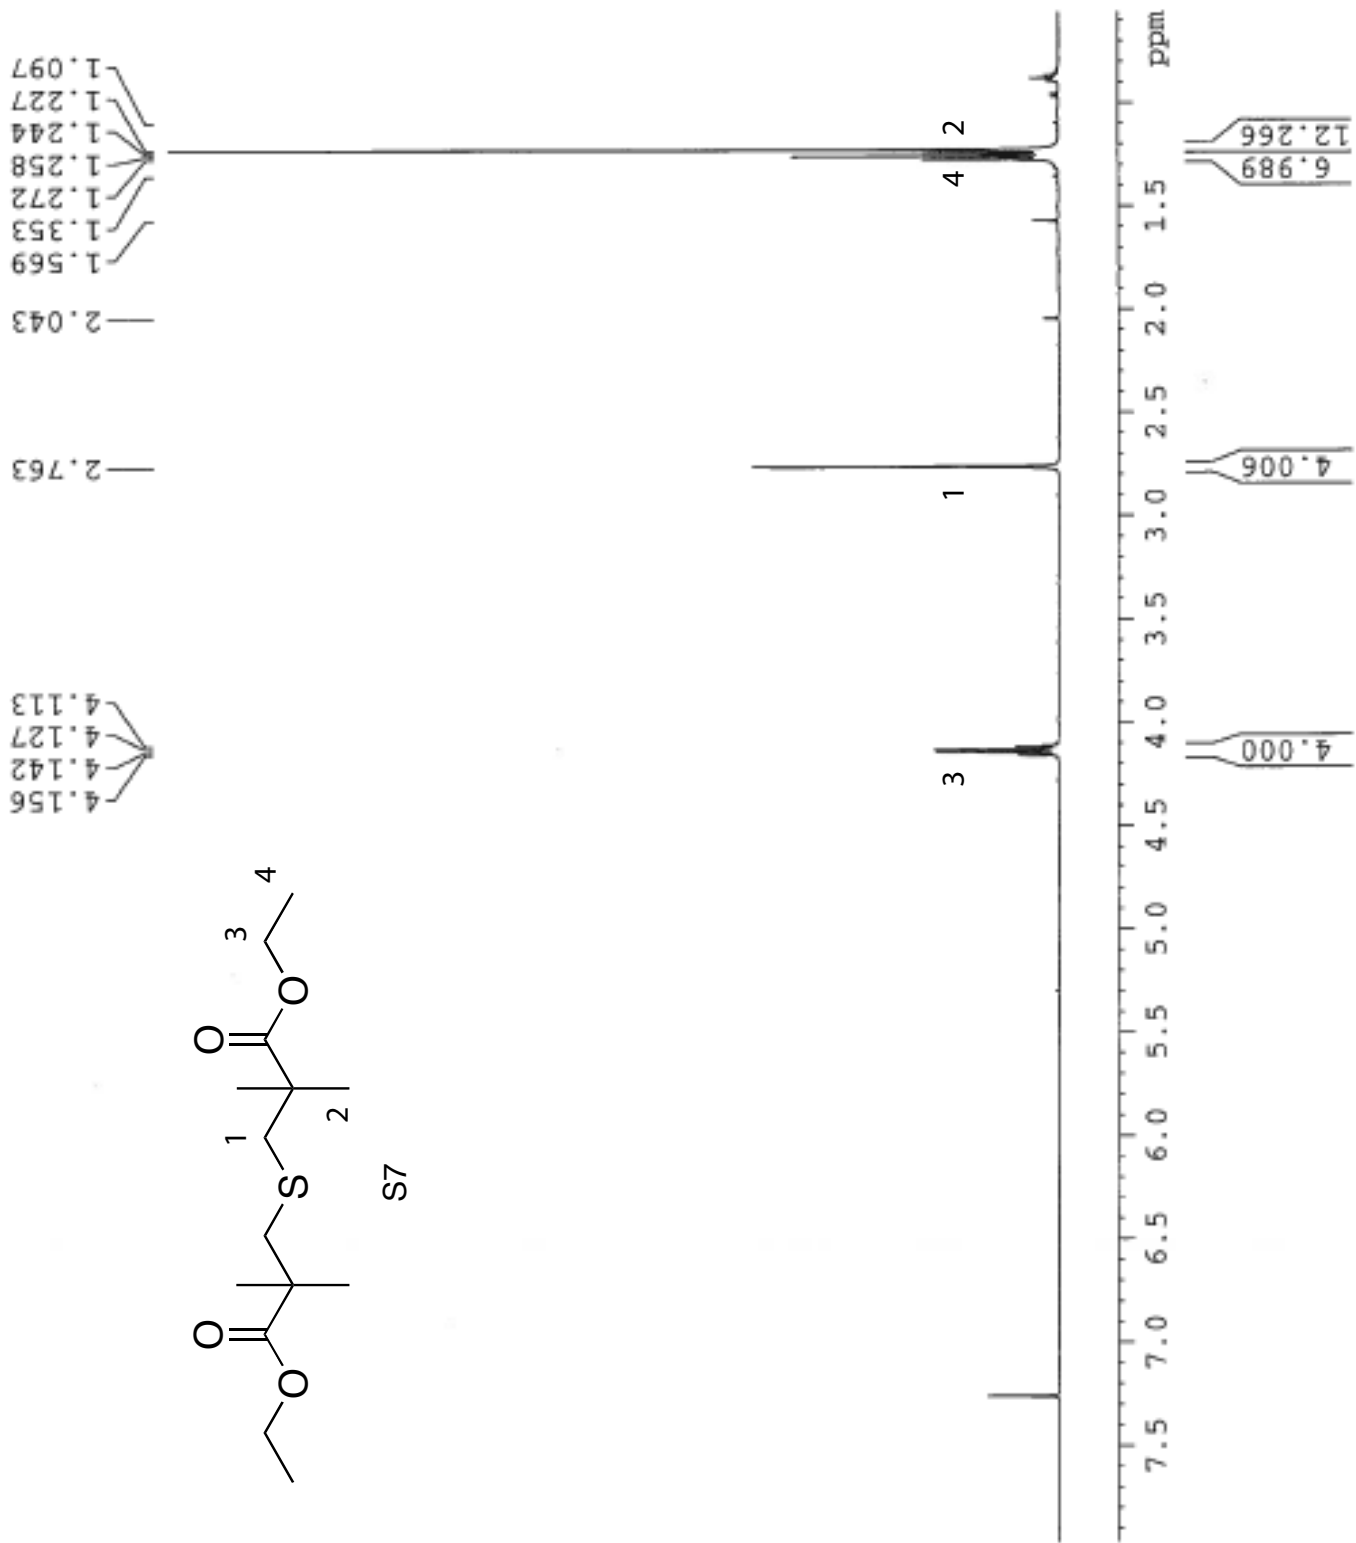

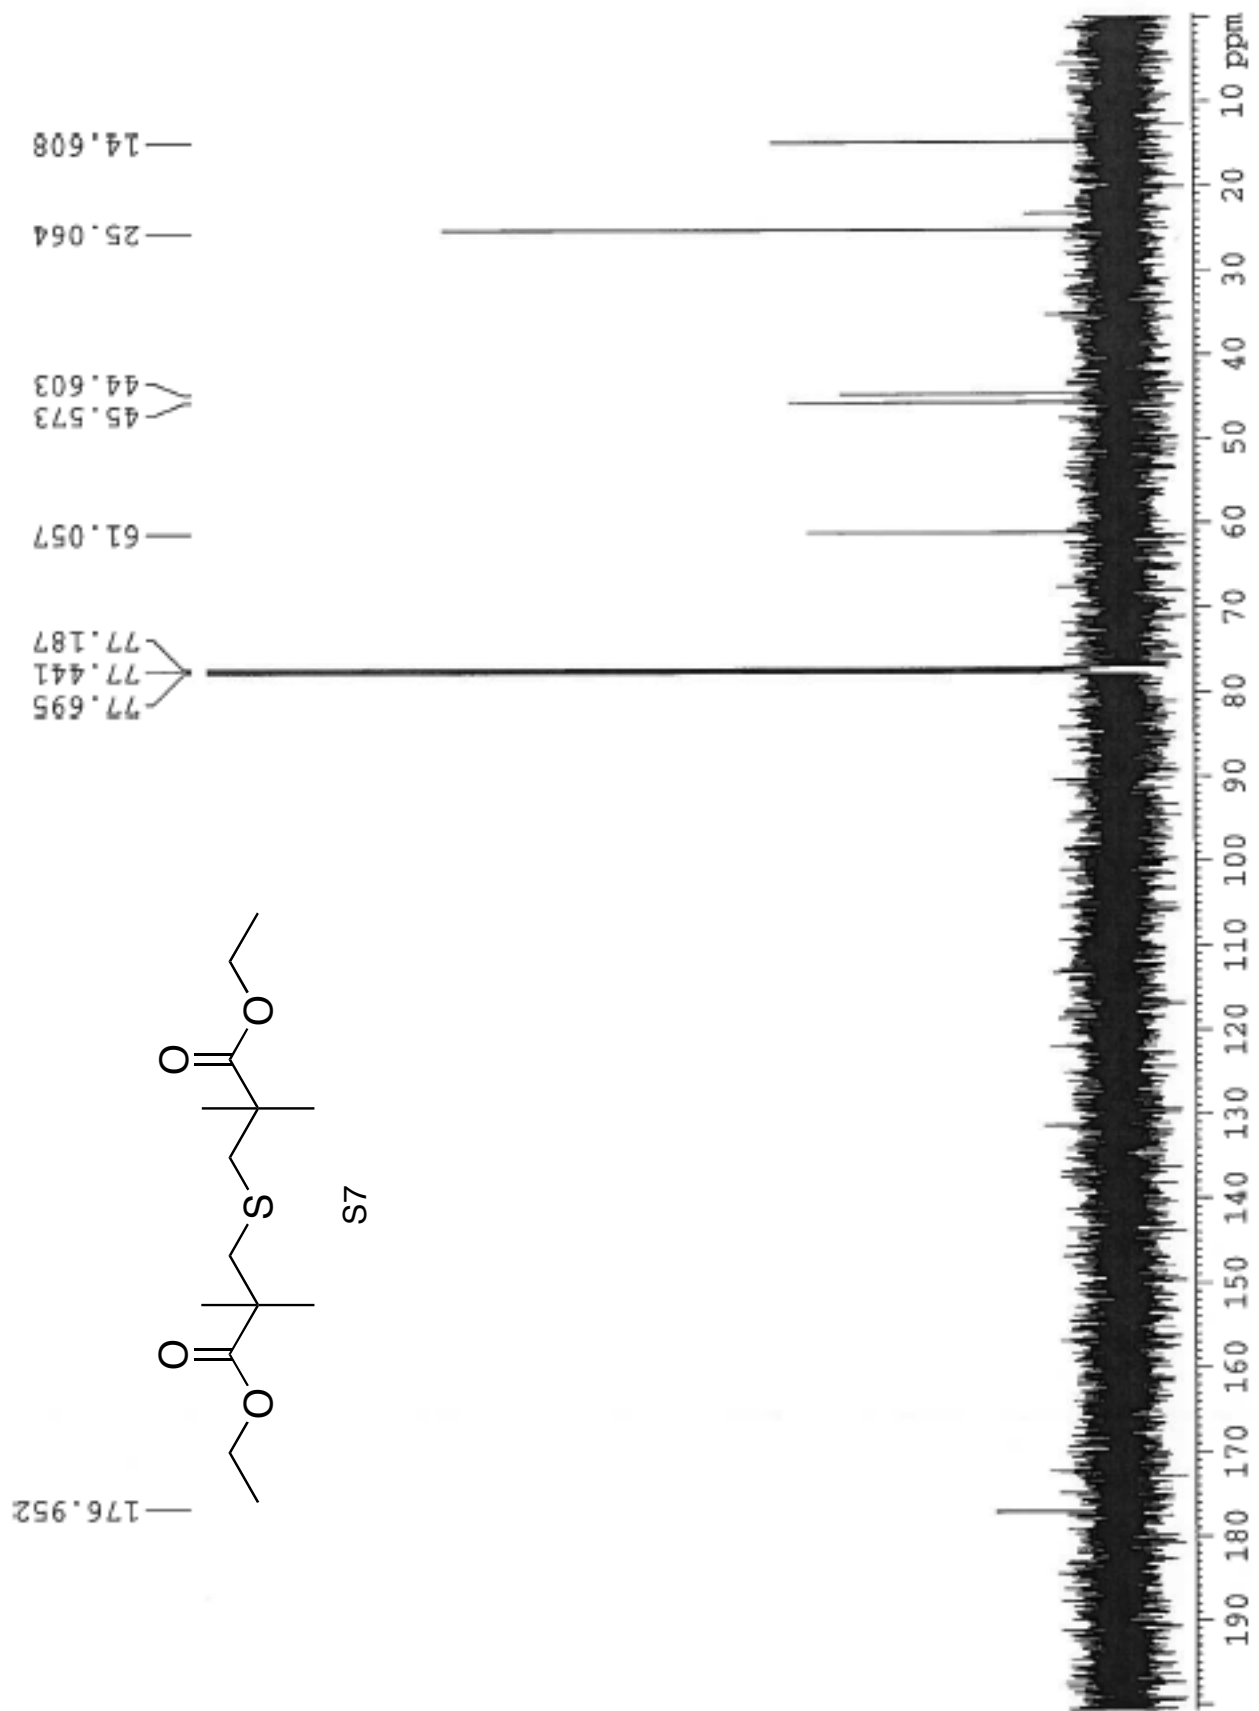

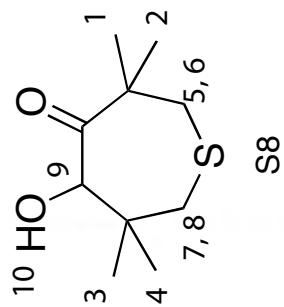

7.432  
7.260

5.298

4.194  
4.149  
3.715  
3.699  
3.438  
2.855  
2.831  
2.802  
2.777  
2.707  
2.682  
2.650  
2.624  
2.536  
2.520  
2.511  
2.489  
2.464  
2.426  
2.402  
2.351  
2.326  
2.310  
2.271  
2.247  
2.204  
2.098  
1.998  
1.988  
1.974  
1.958  
1.403  
1.298  
1.272  
1.265  
1.255  
1.233

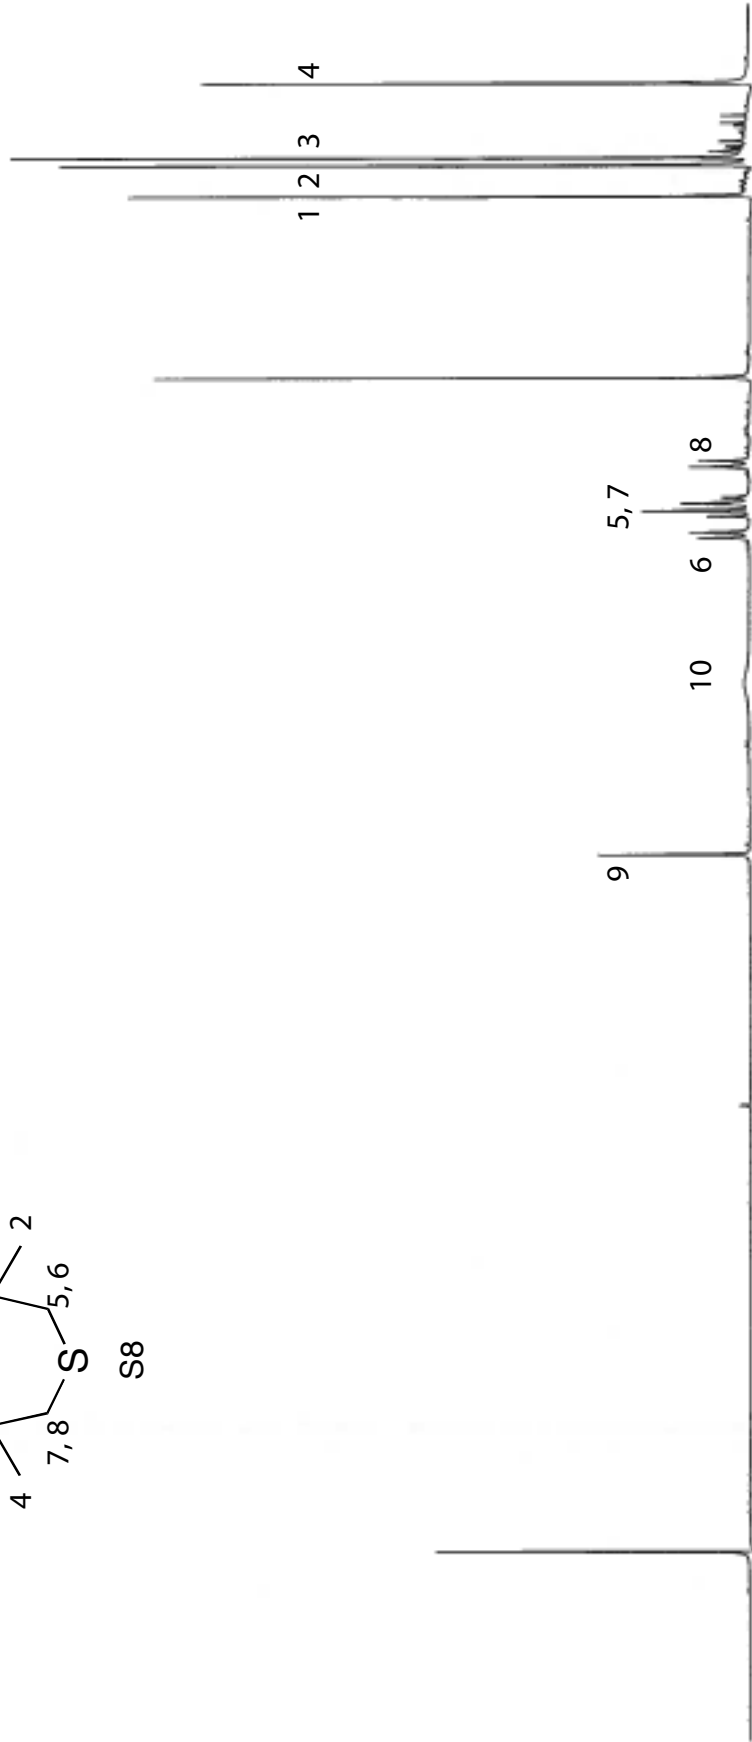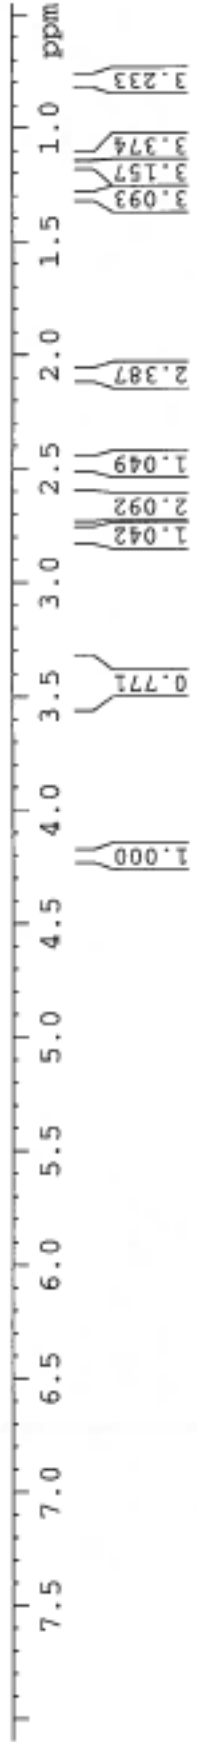

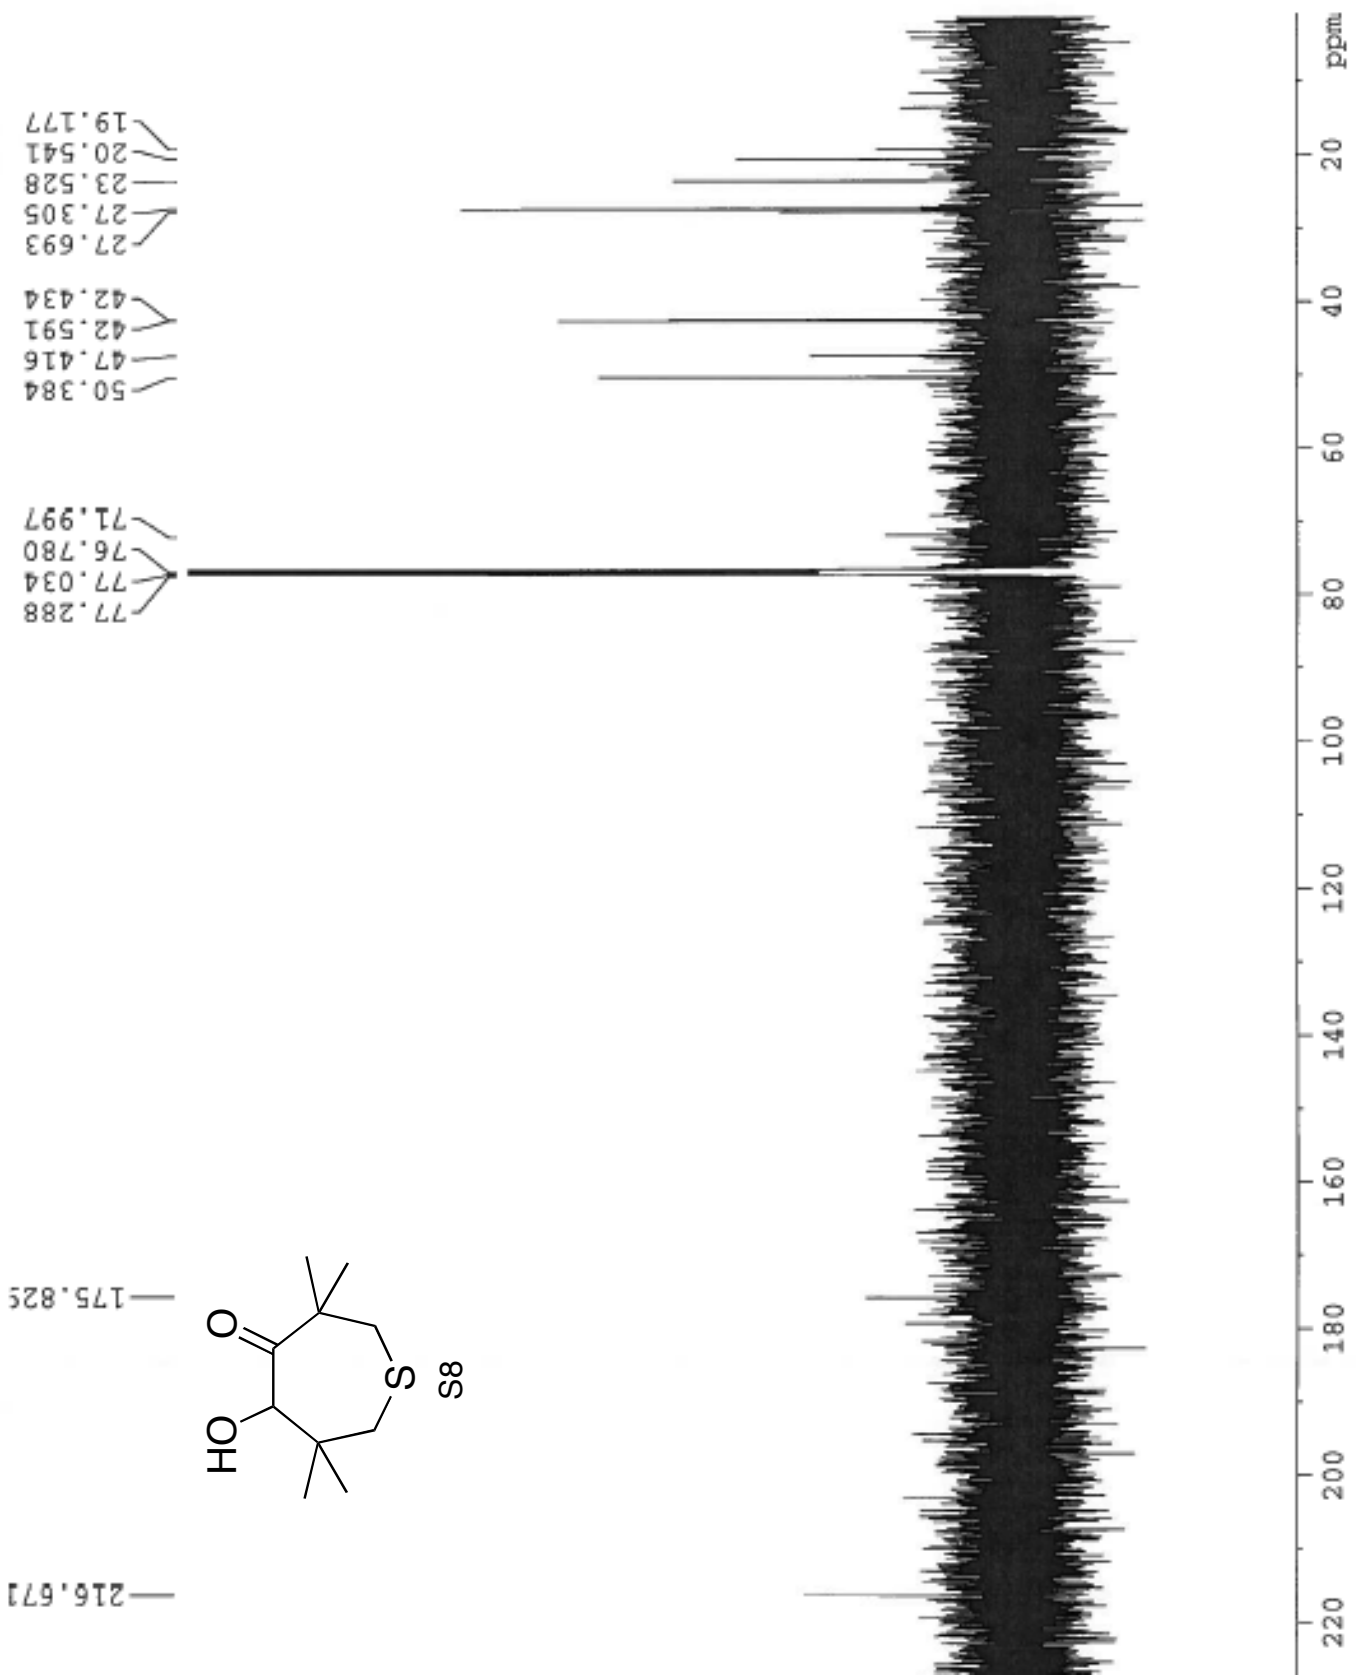

GdA4-159A  
AVB-400 ZBO Proton starting parameters. 6/11/03 RN

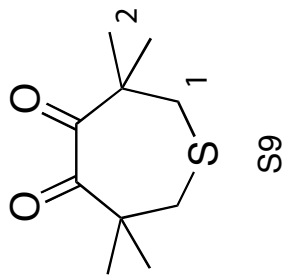

-1.26

-2.57

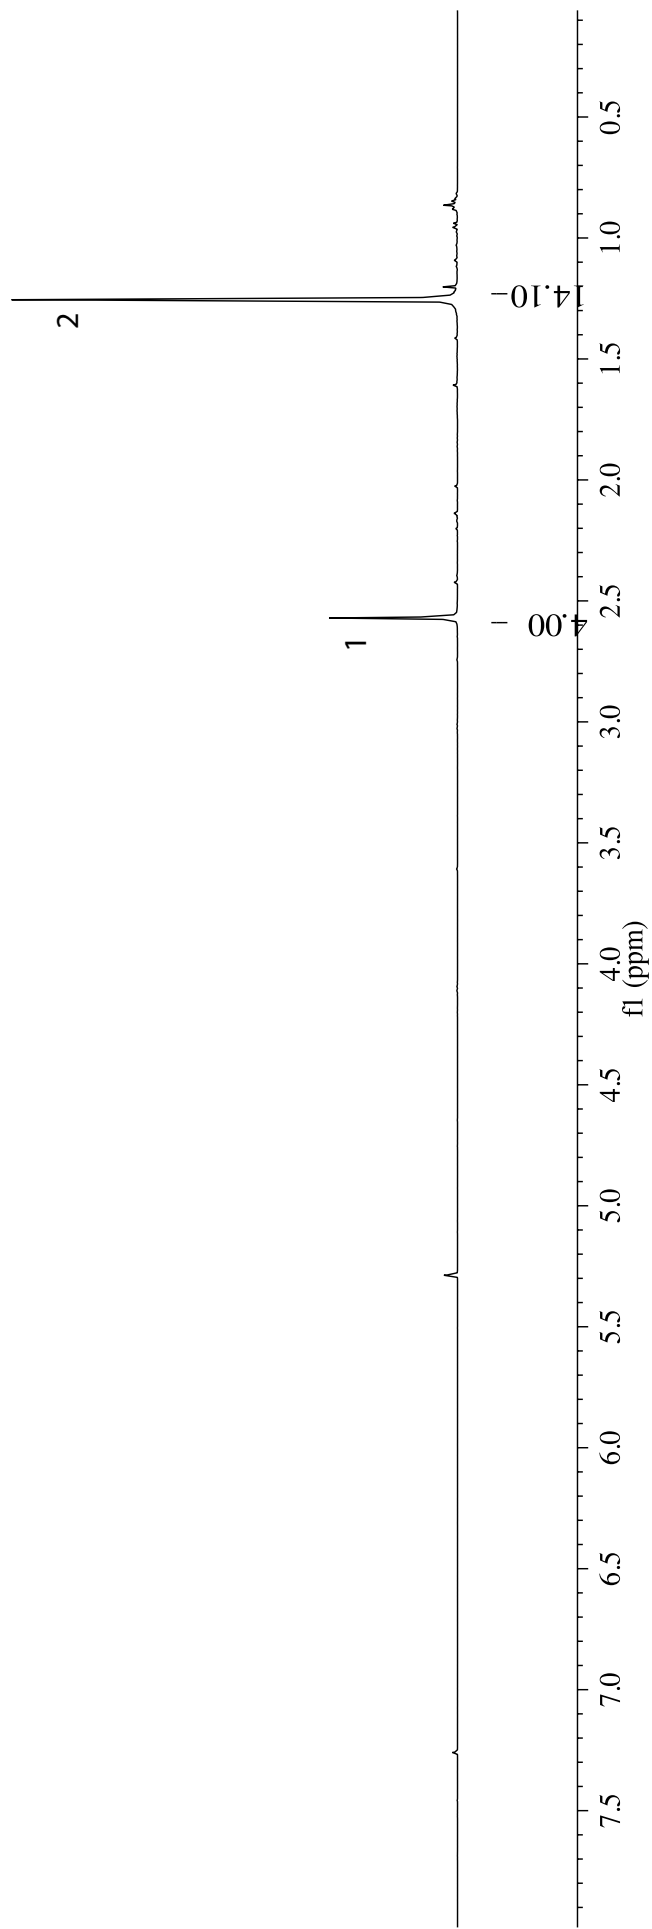



GdA471p9A  
AVB-480 ZBO Carbon Starting parameters 6/11/03 RN

-211

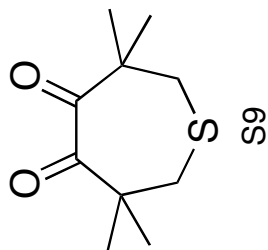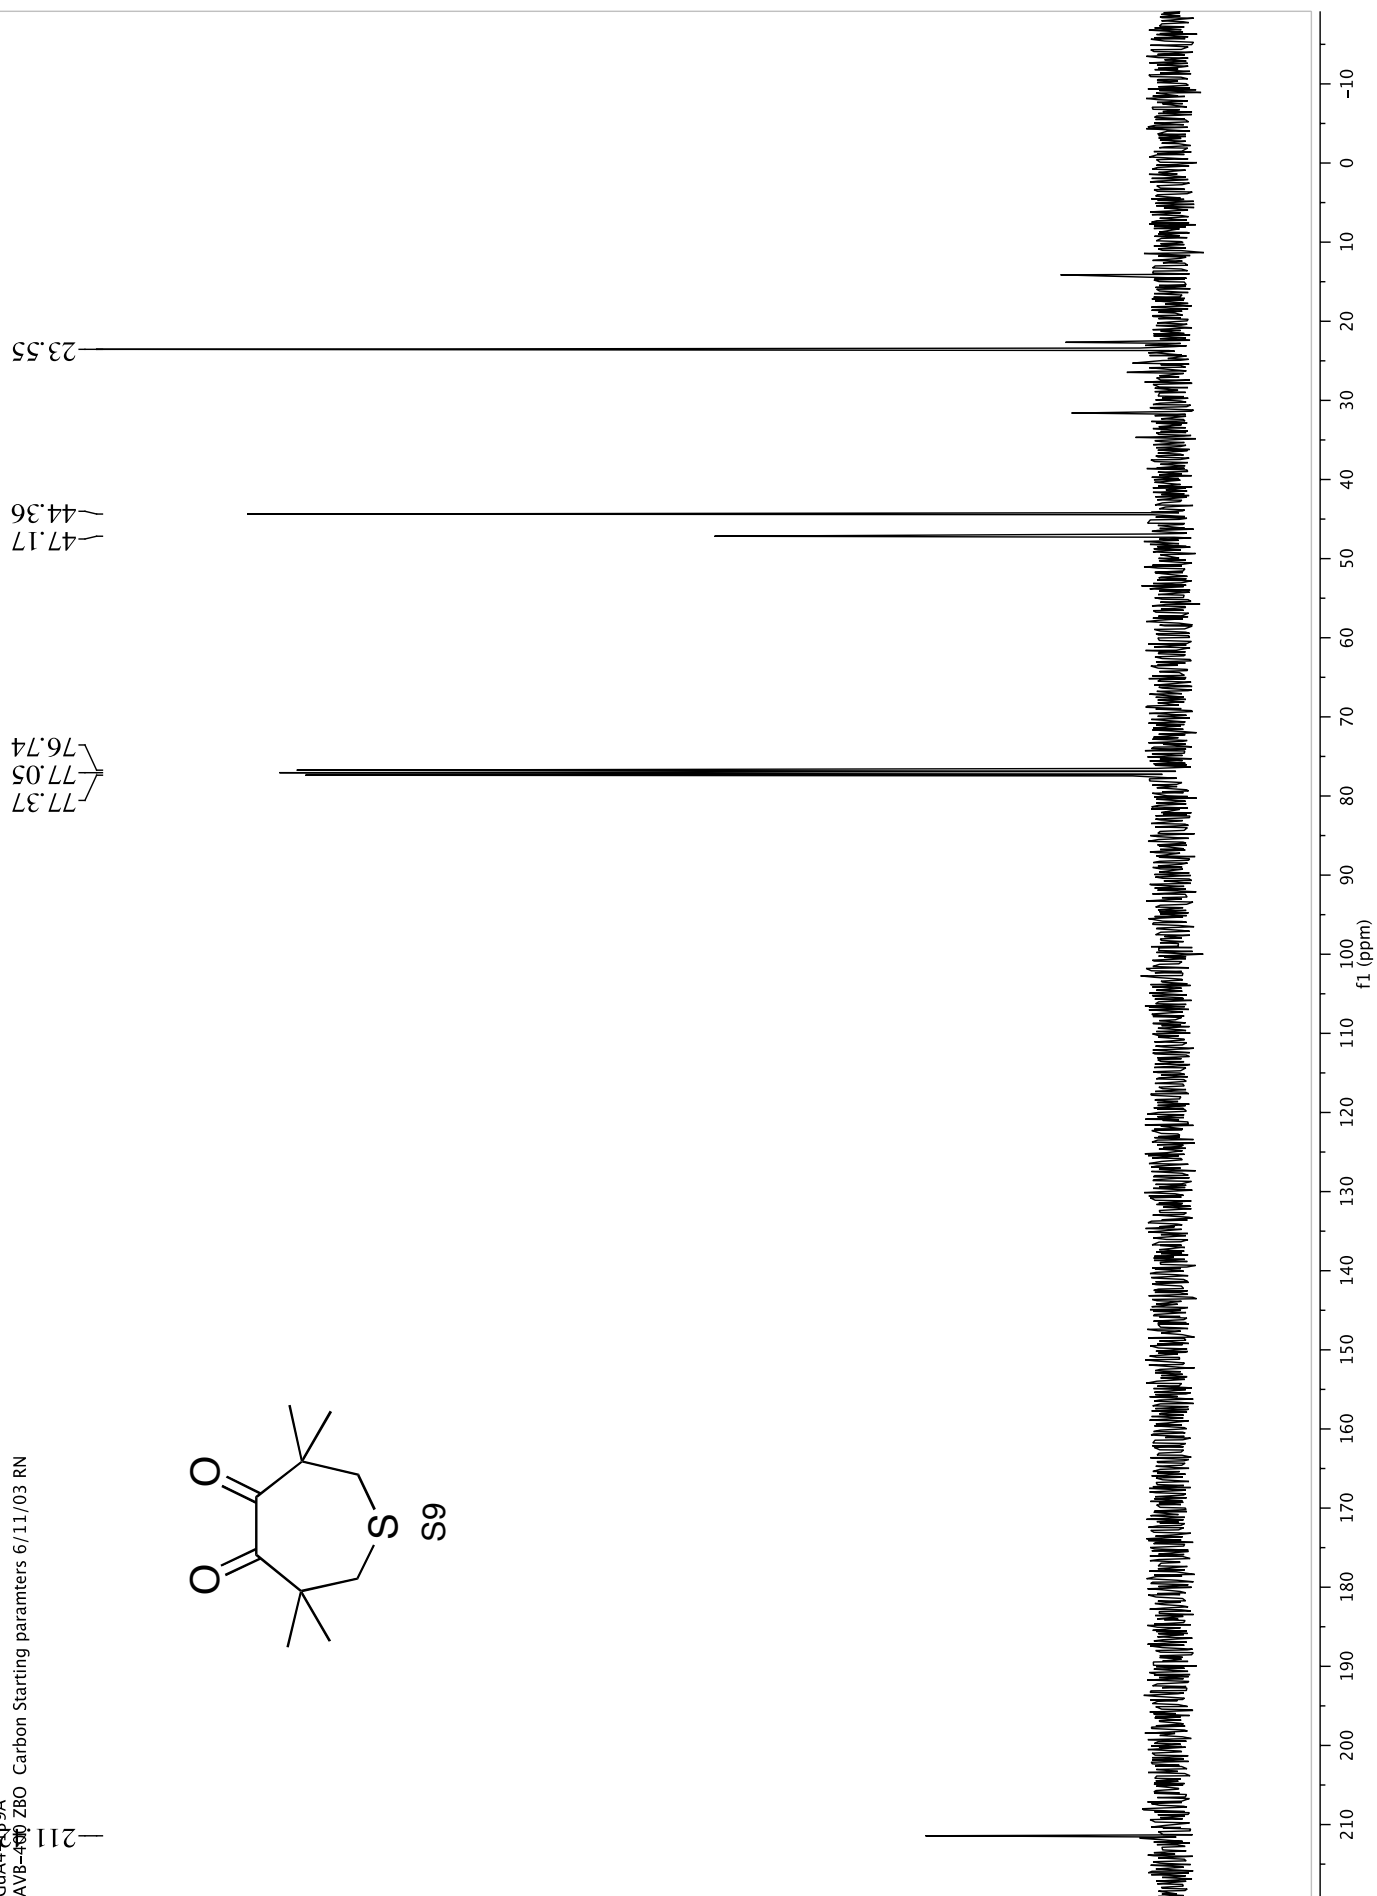

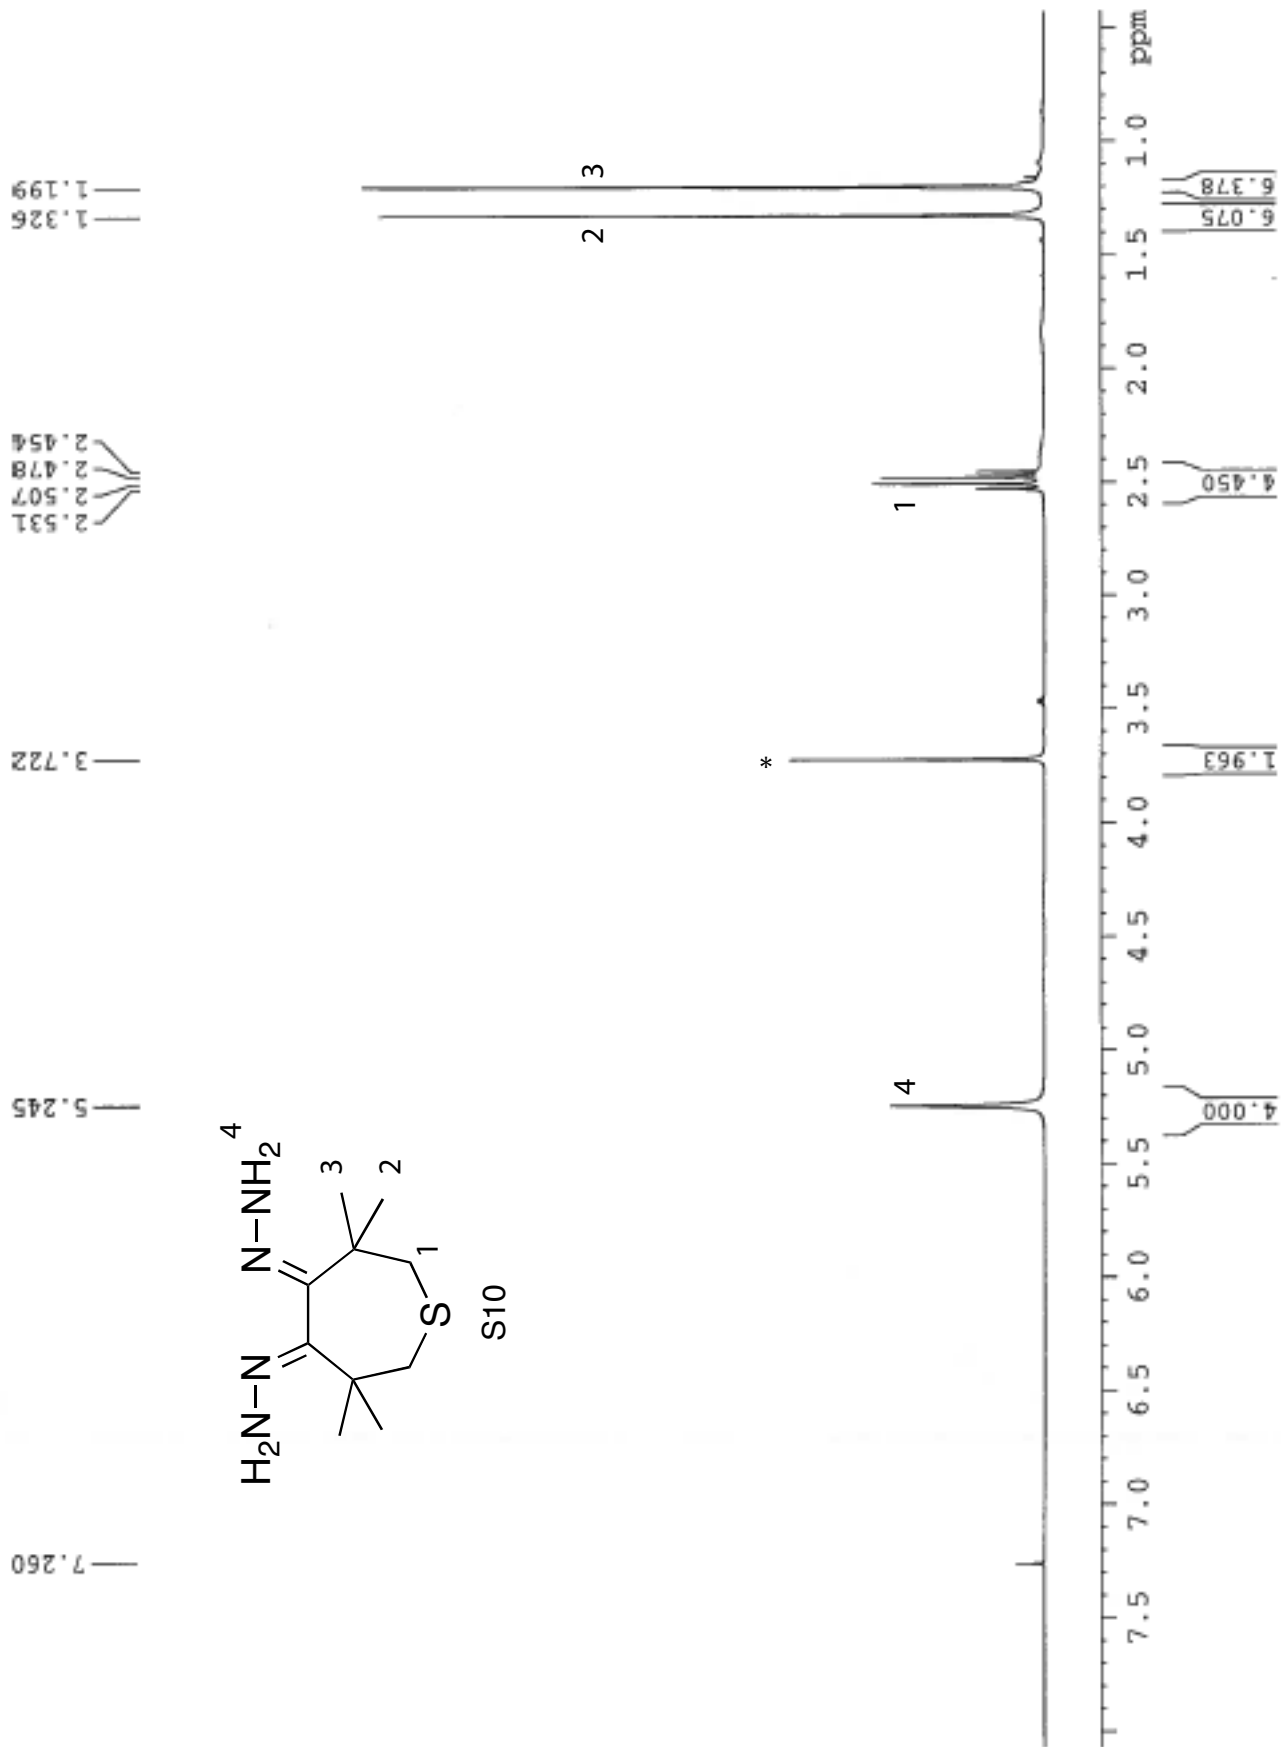

\* = ethylene glycol

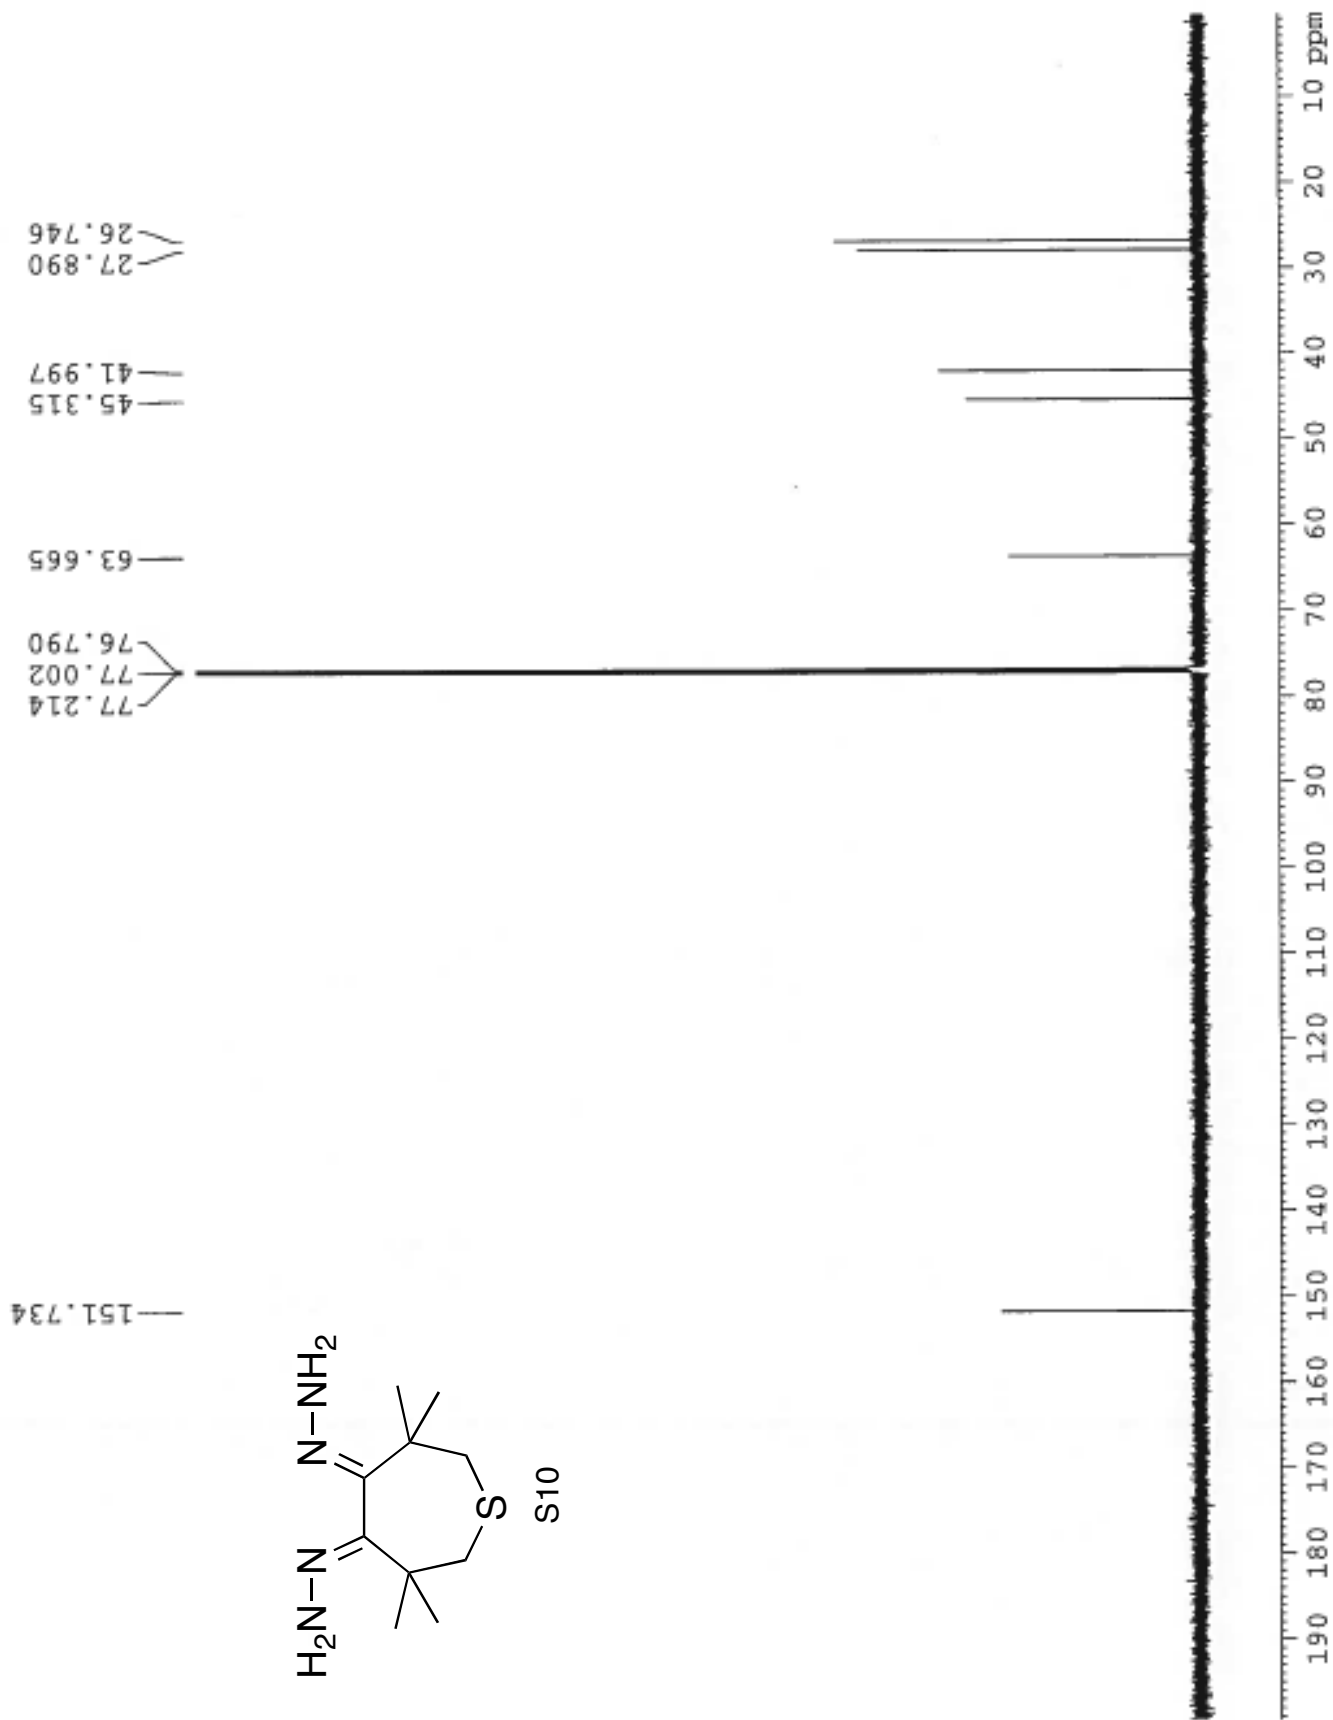

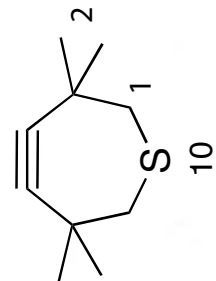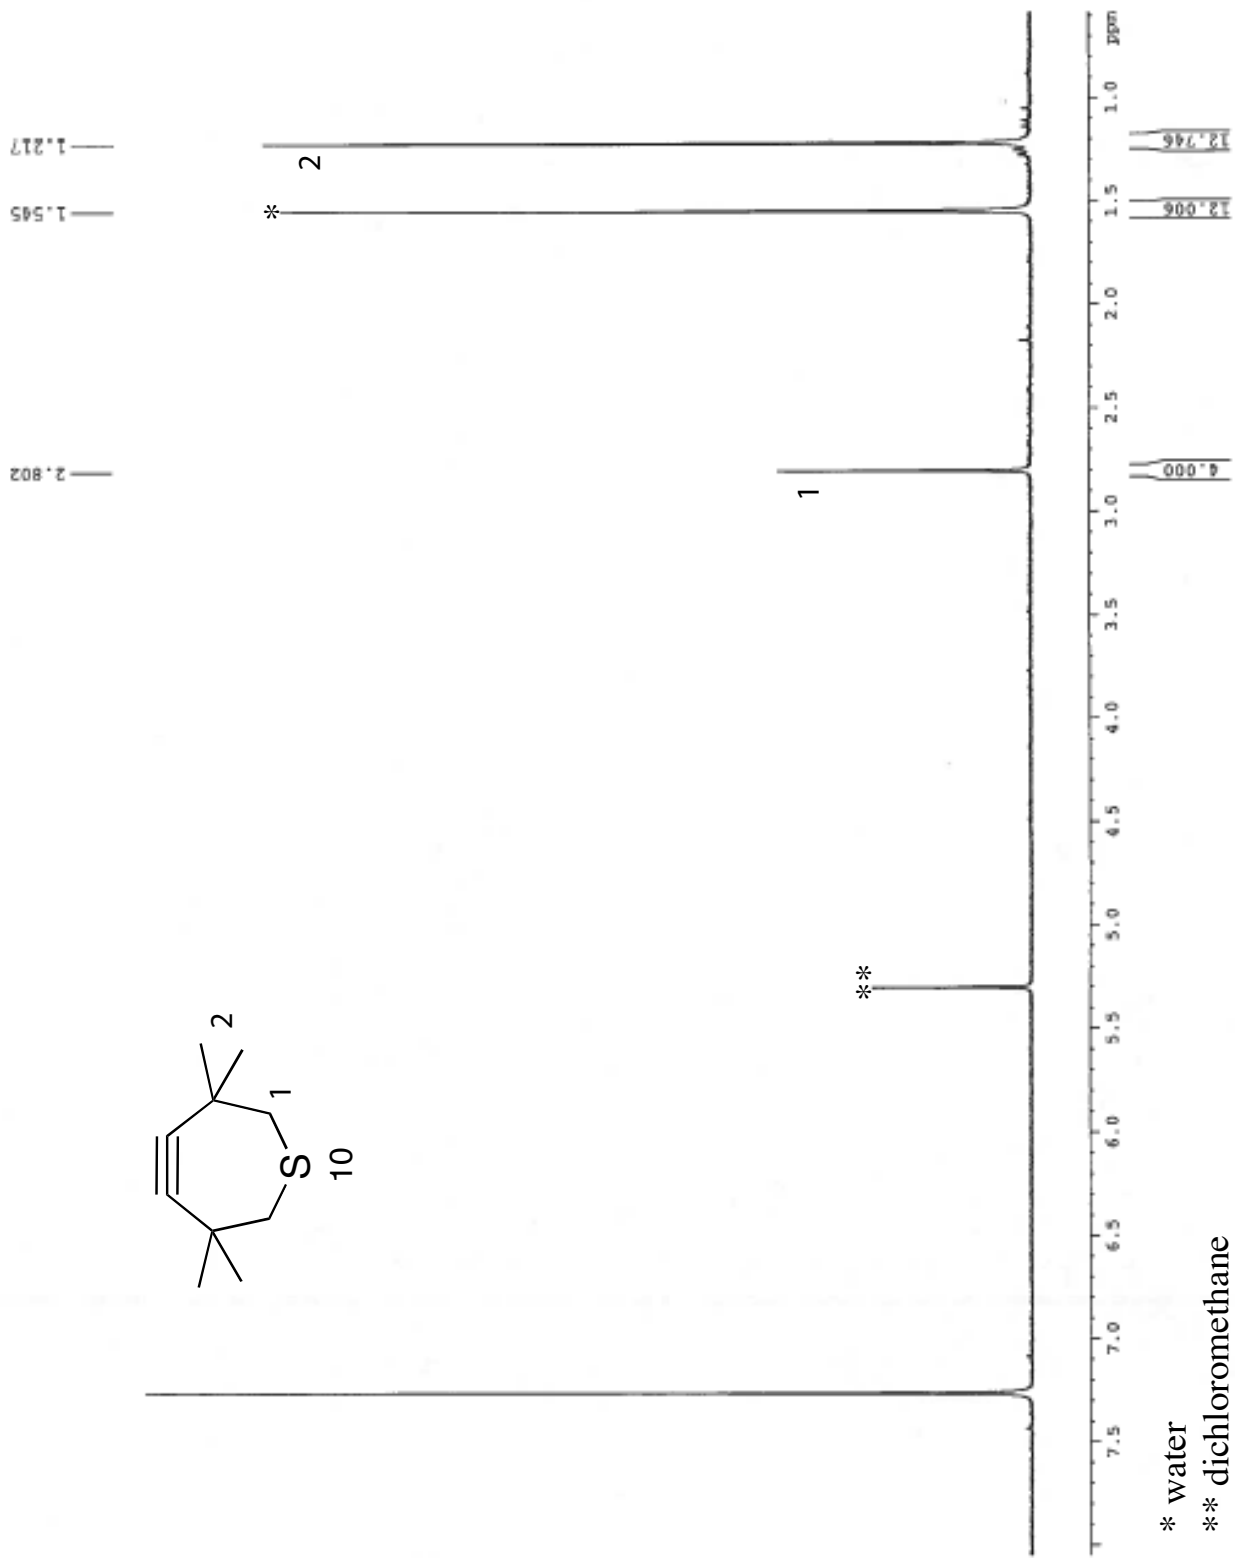

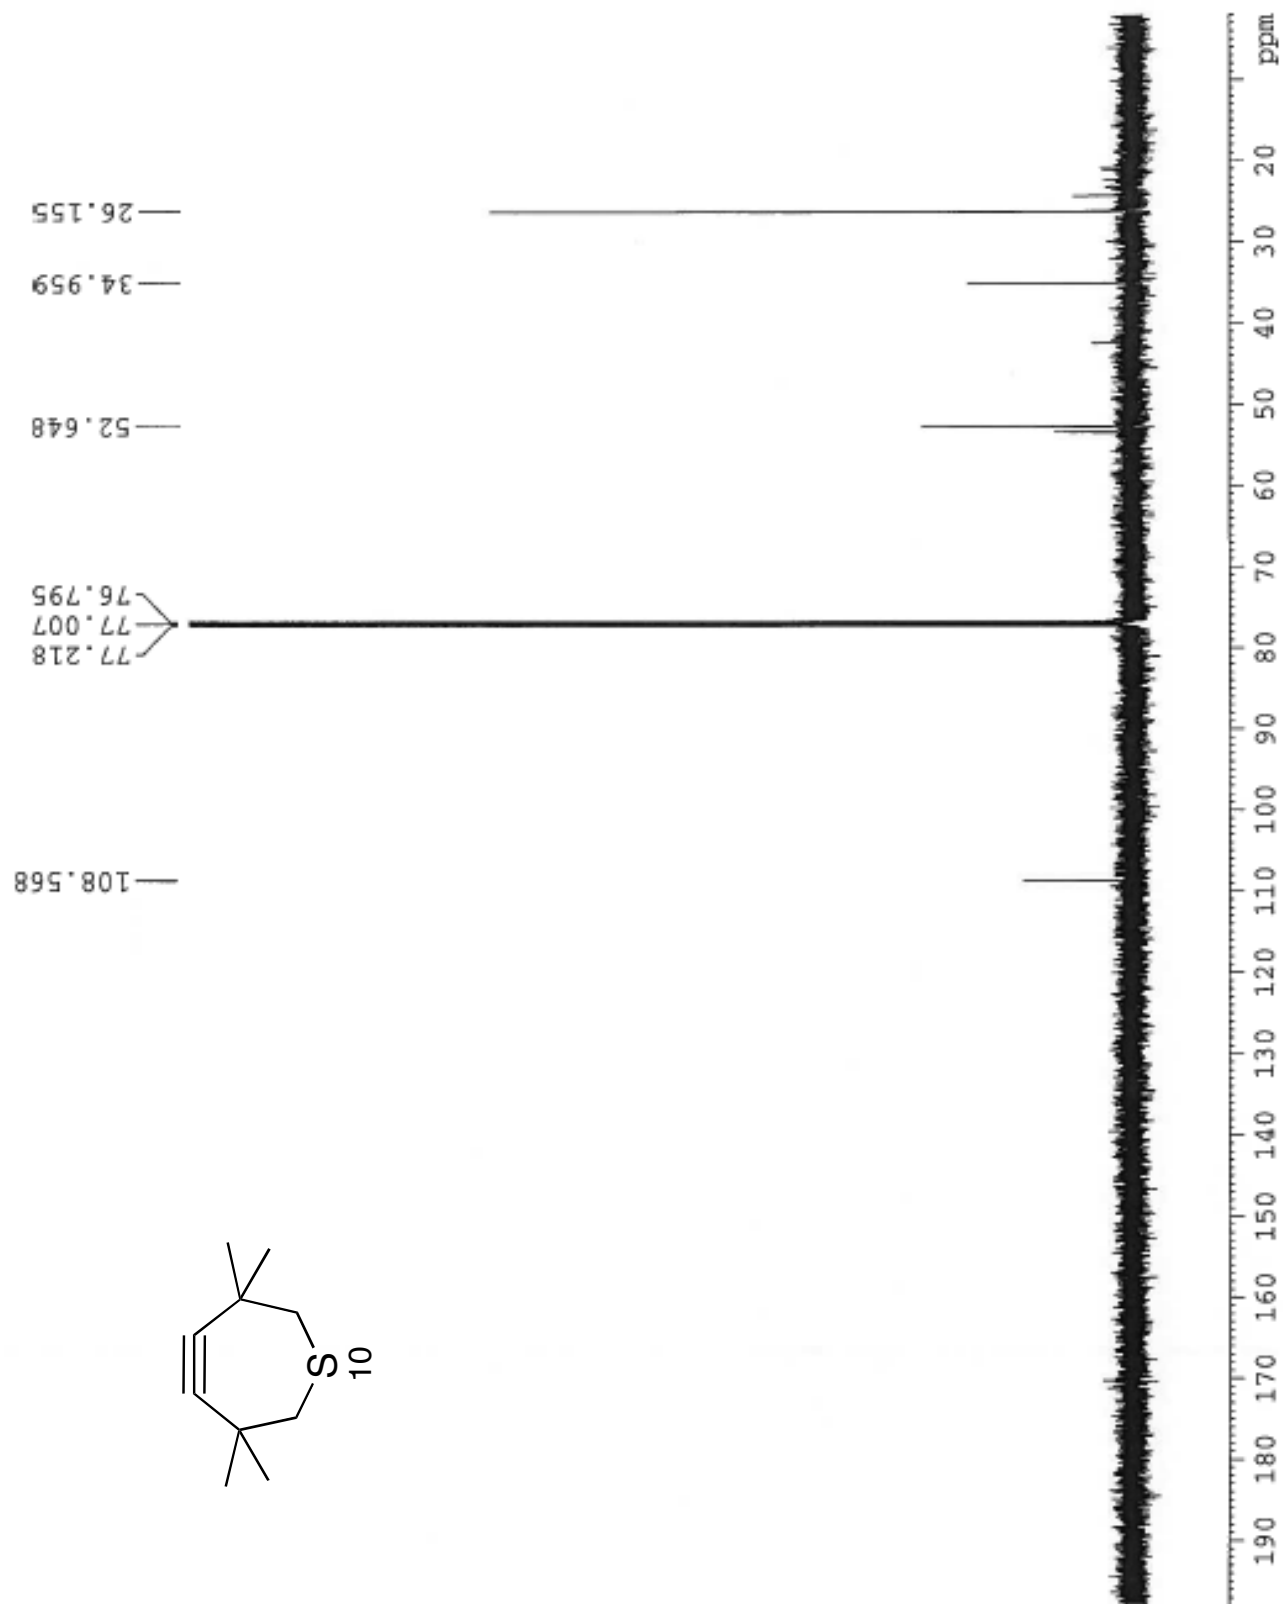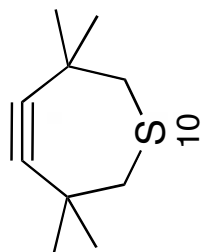

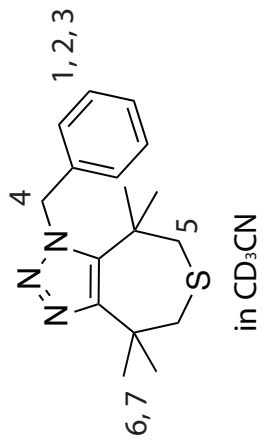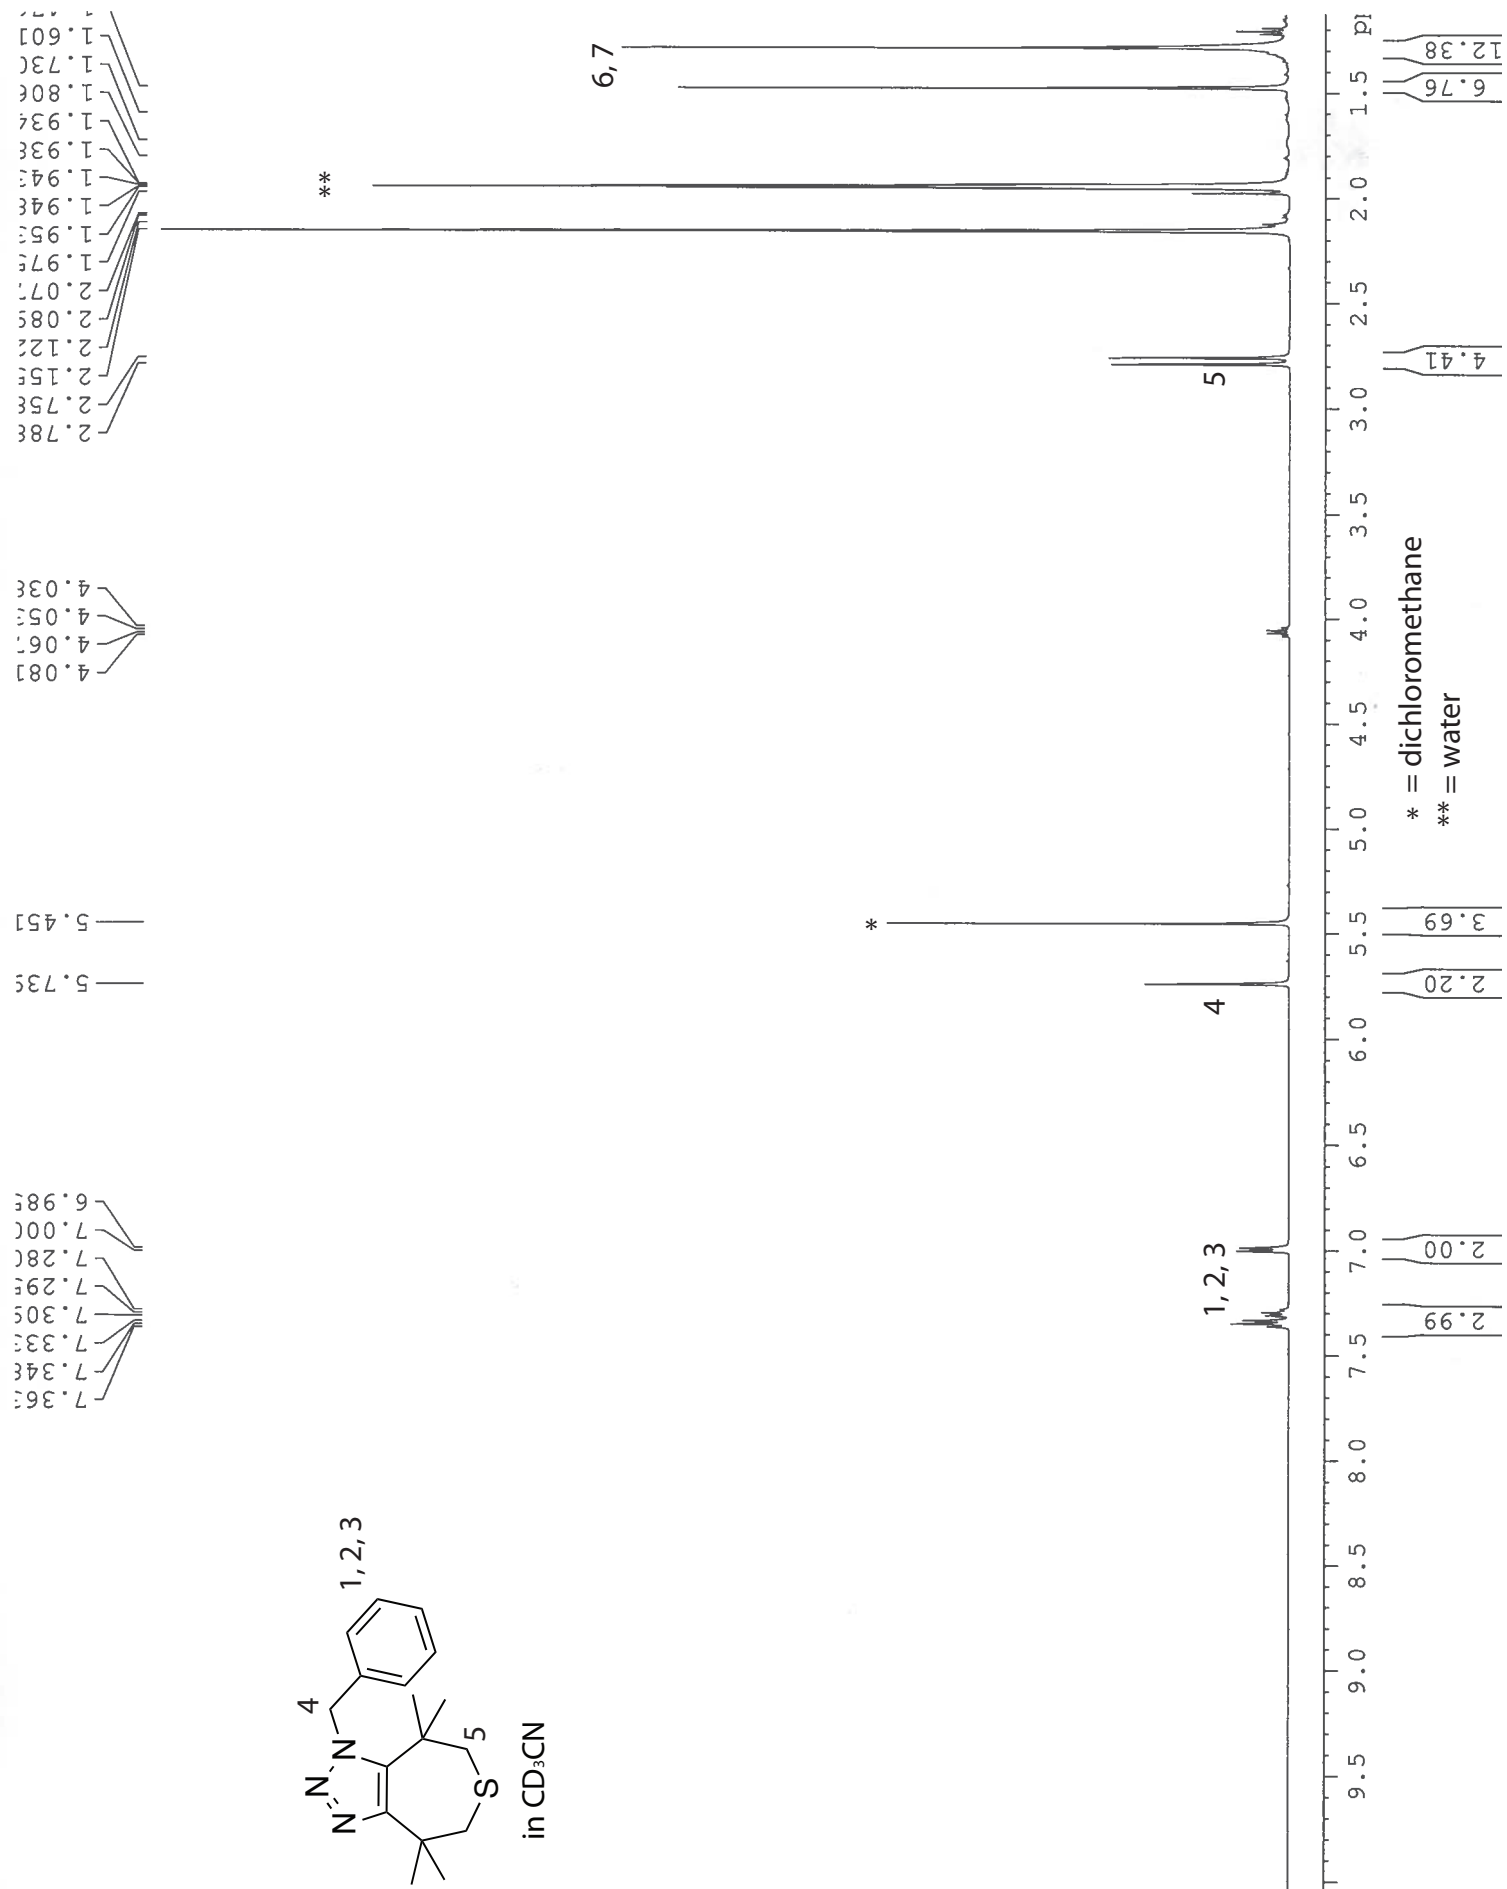

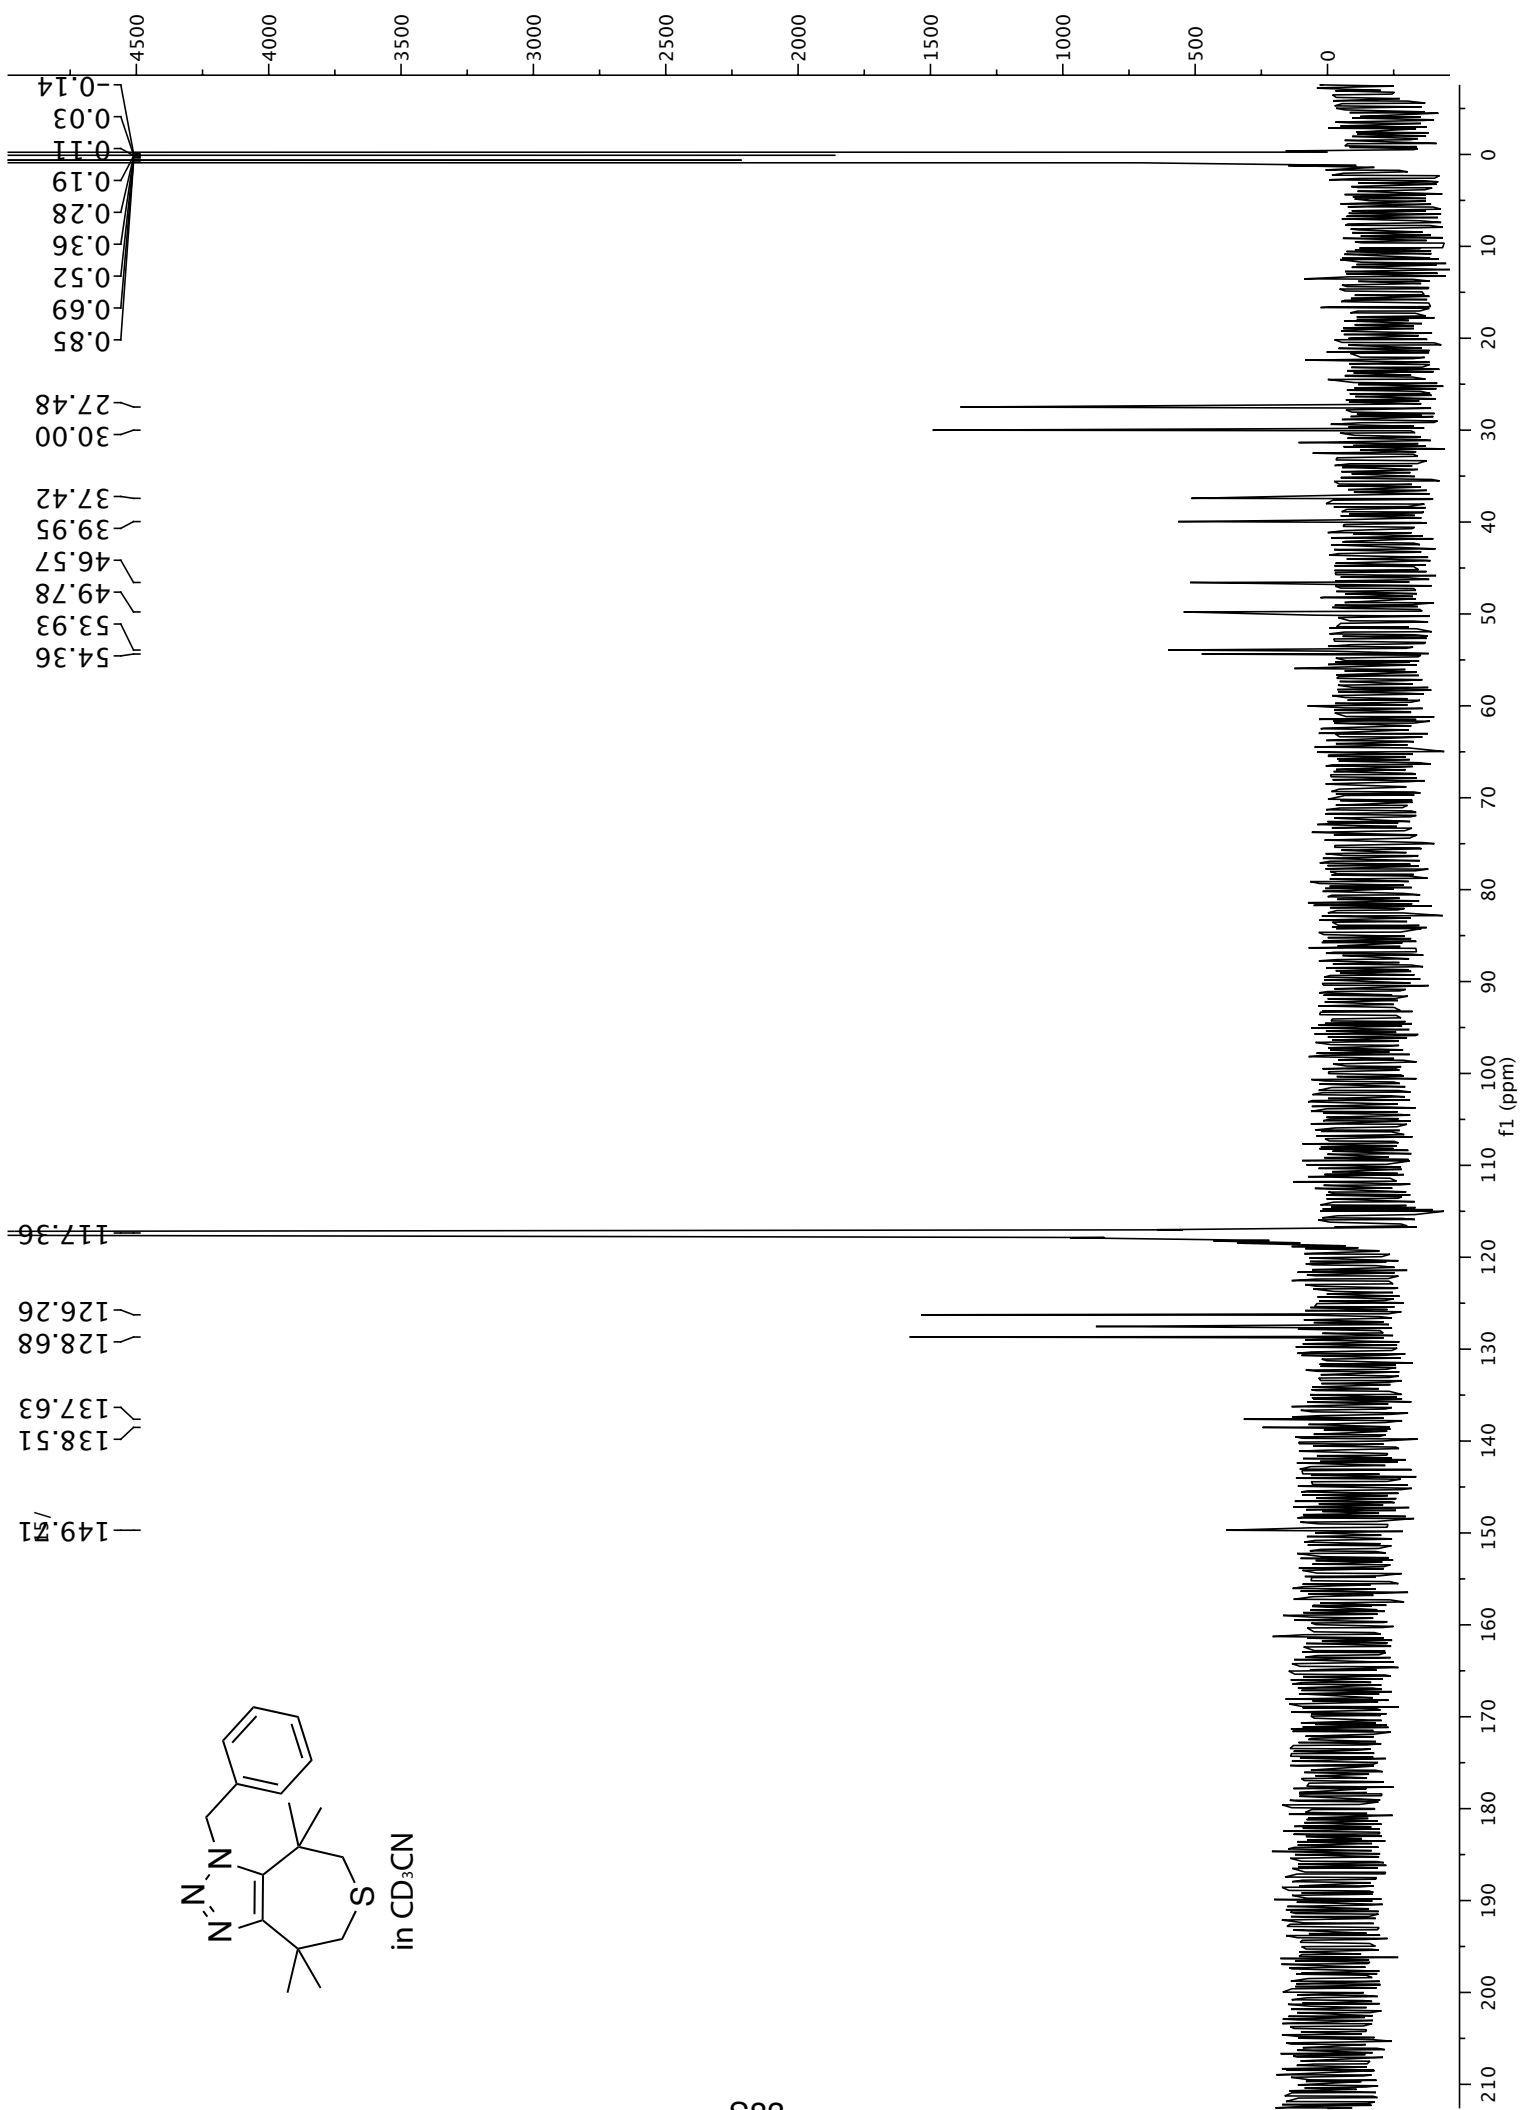

1.22  
1.29  
1.30  
1.31  
2.01  
2.85  
2.86  
2.87  
2.87  
2.88  
2.89  
2.89  
2.90  
2.90  
2.91  
3.04  
3.05  
3.08  
3.08  
3.09  
3.10

7.10  
7.10  
7.12  
7.13  
7.13  
7.19  
7.19  
7.20  
7.20  
7.26  
7.30  
7.30  
7.31  
7.31  
7.31  
7.31  
7.32  
7.33  
7.33  
8.04  
8.05  
8.05  
8.06  
8.06

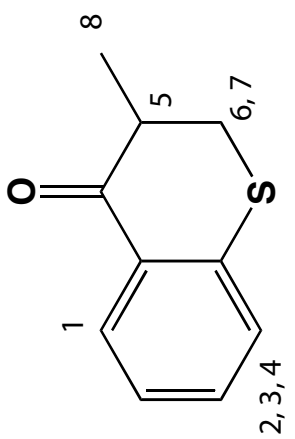

S84

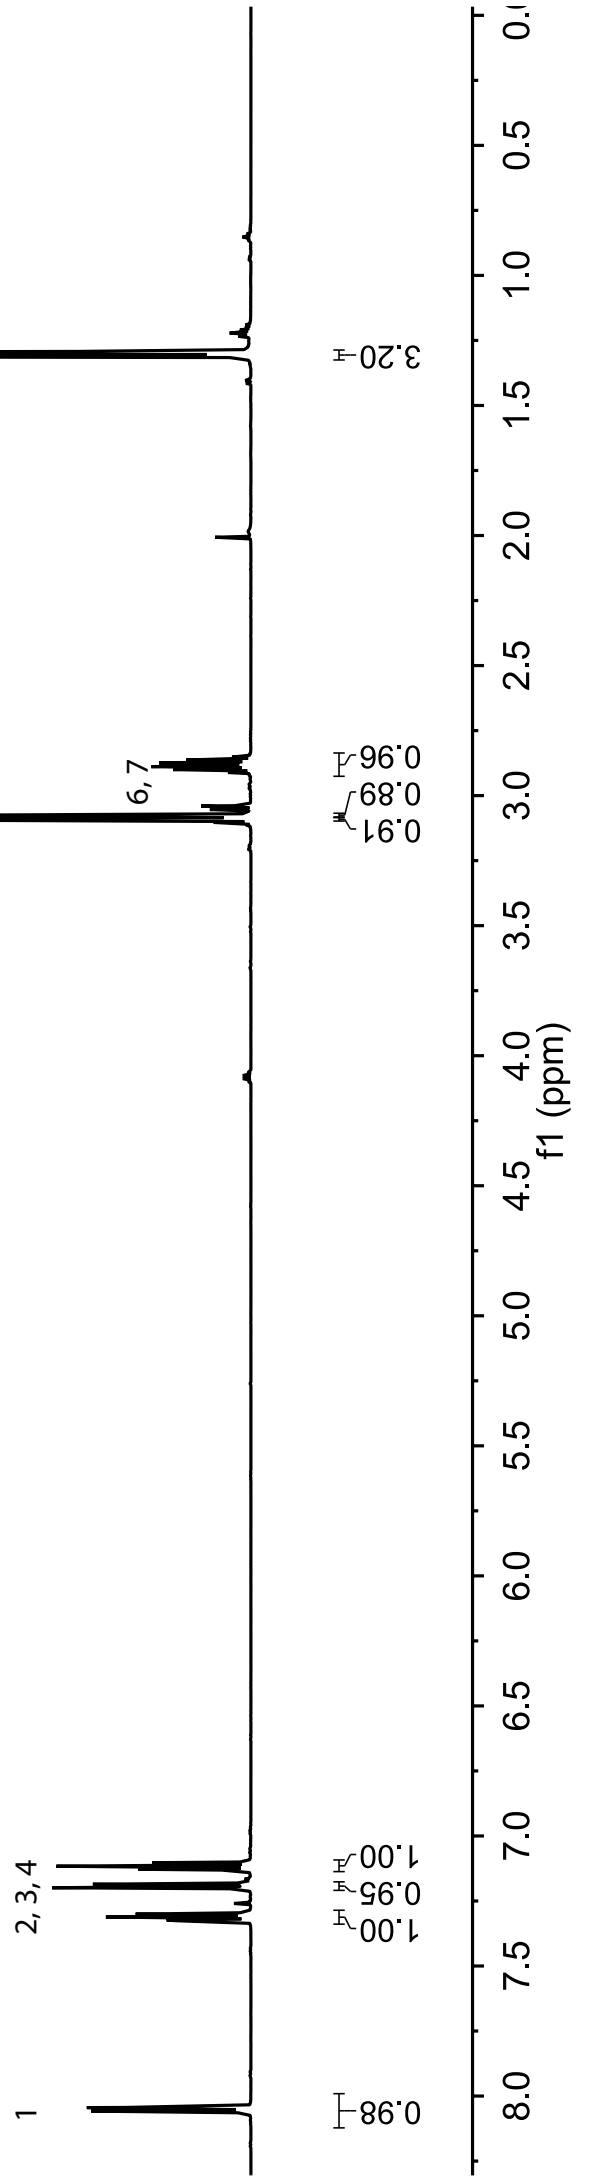



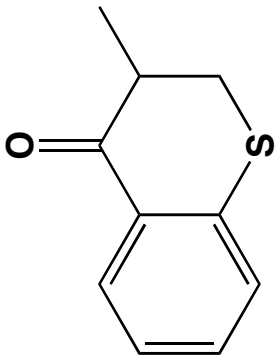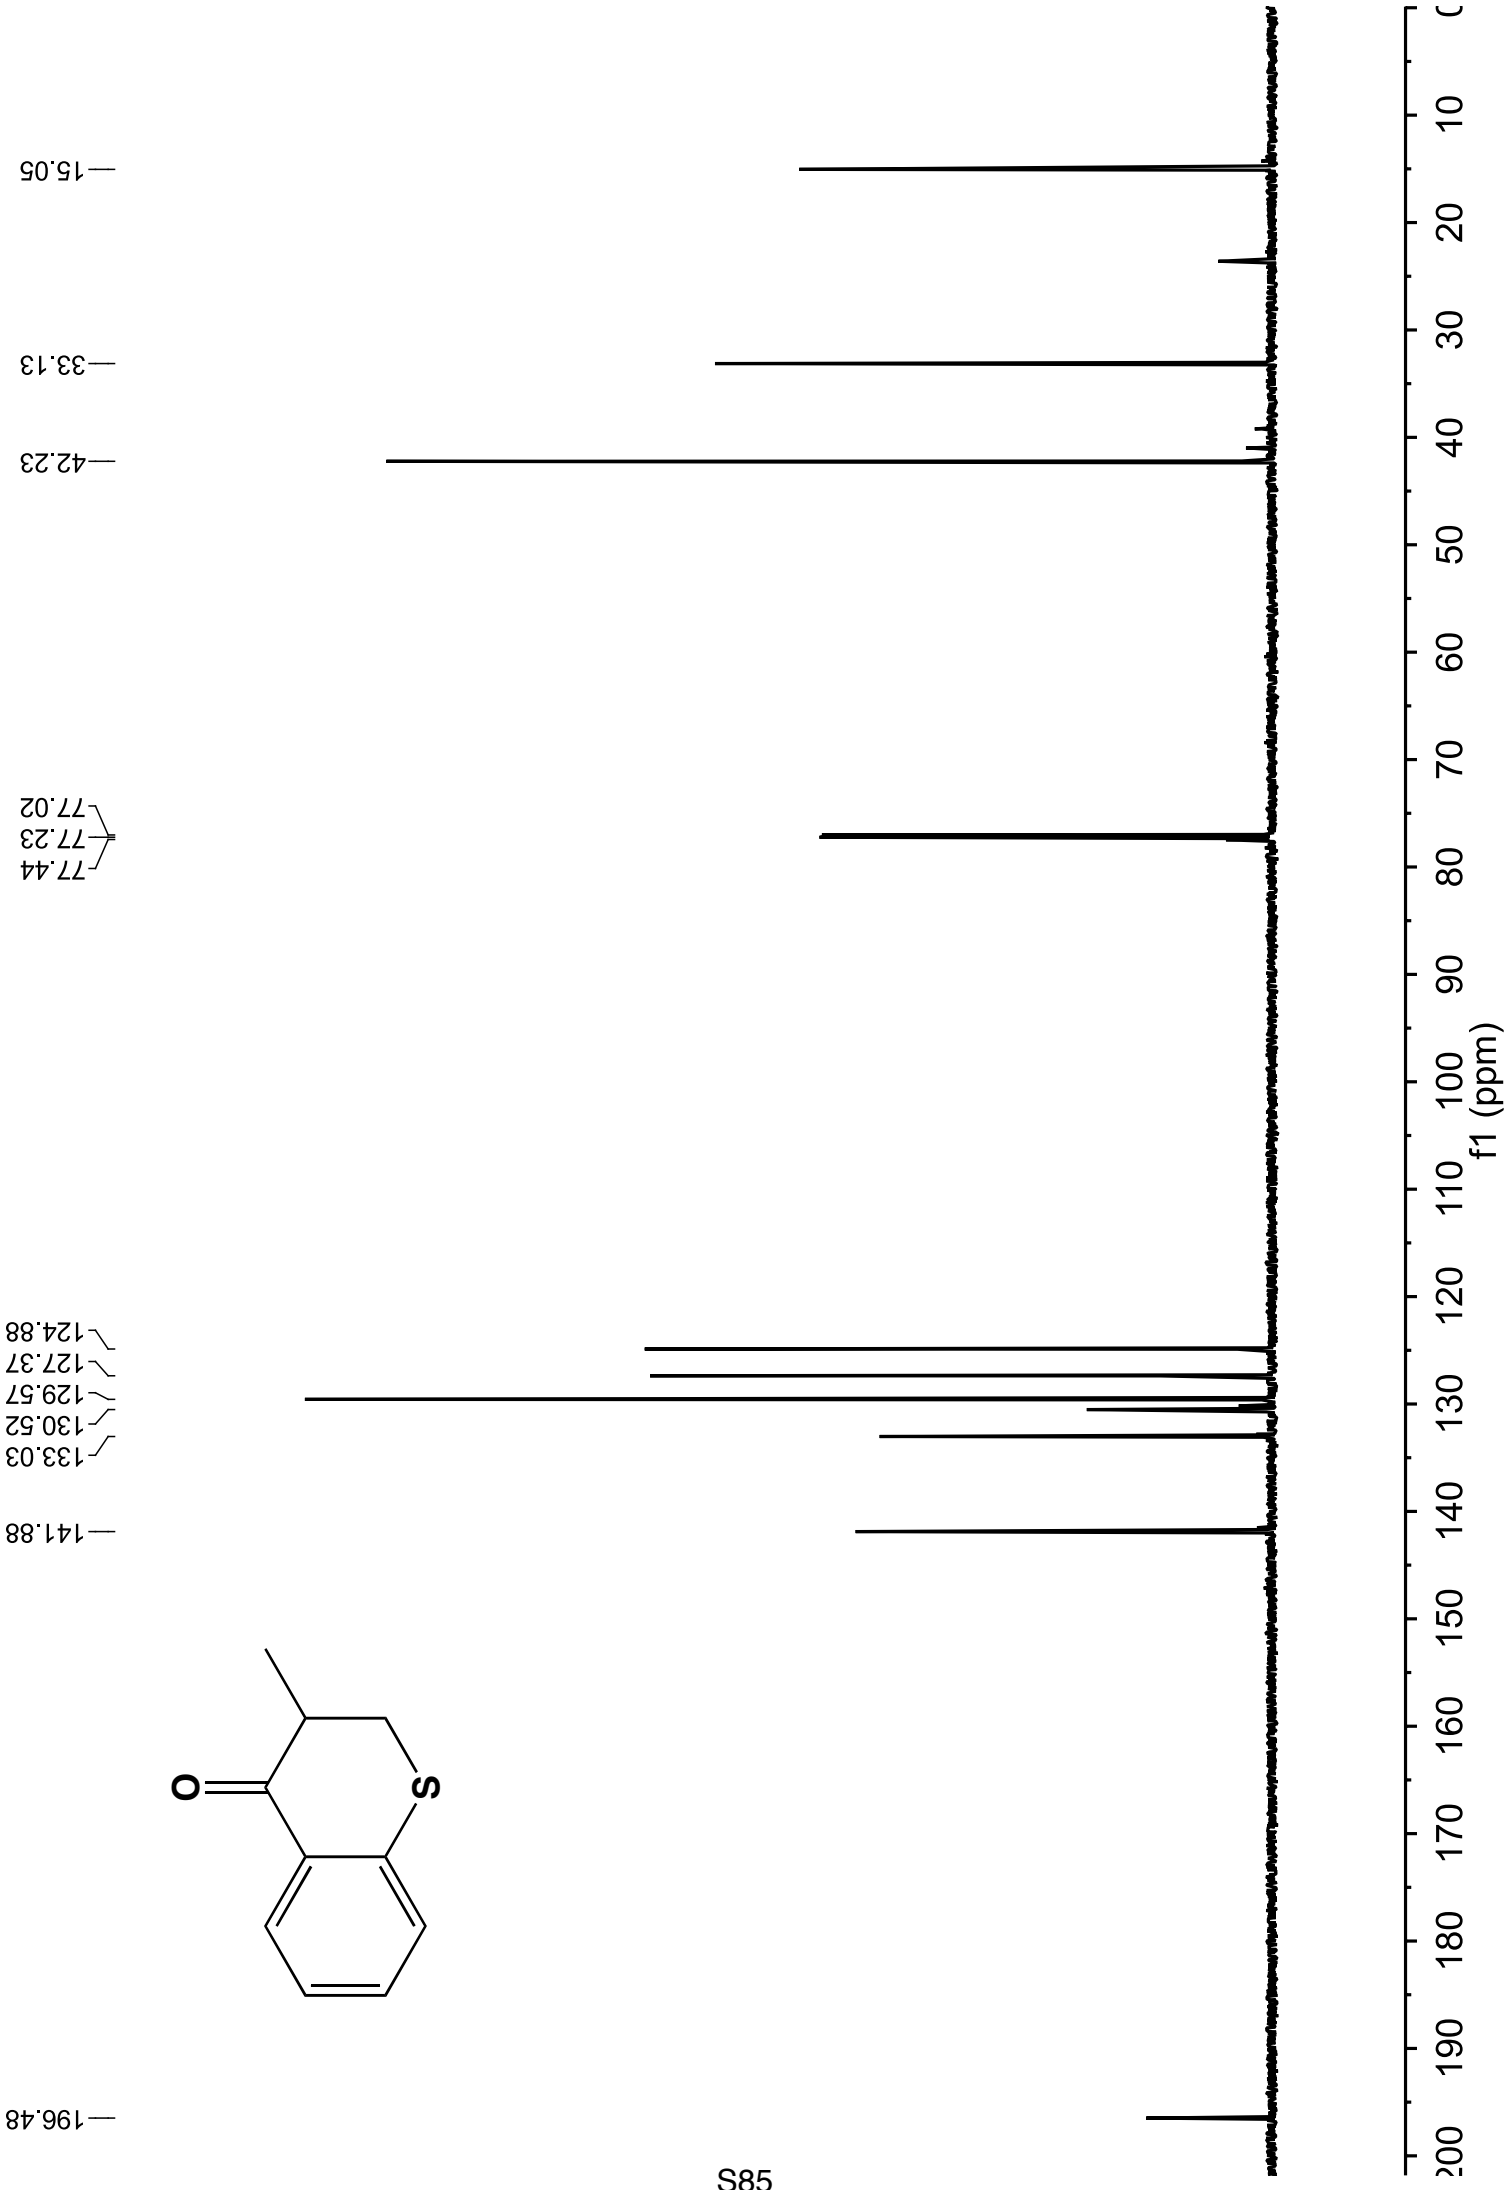

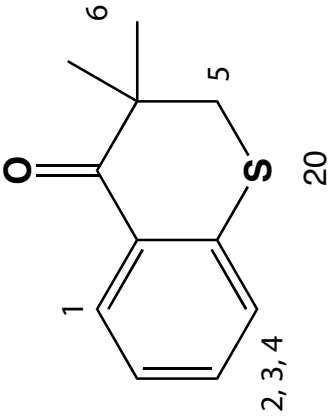

8.09  
8.08  
8.08  
8.08  
7.35  
7.35  
7.33  
7.33  
7.33  
7.33  
7.33  
7.33  
7.32  
7.32  
7.21  
7.21  
7.19  
7.19  
7.16  
7.16  
7.14  
7.14  
7.14  
7.13  
7.13

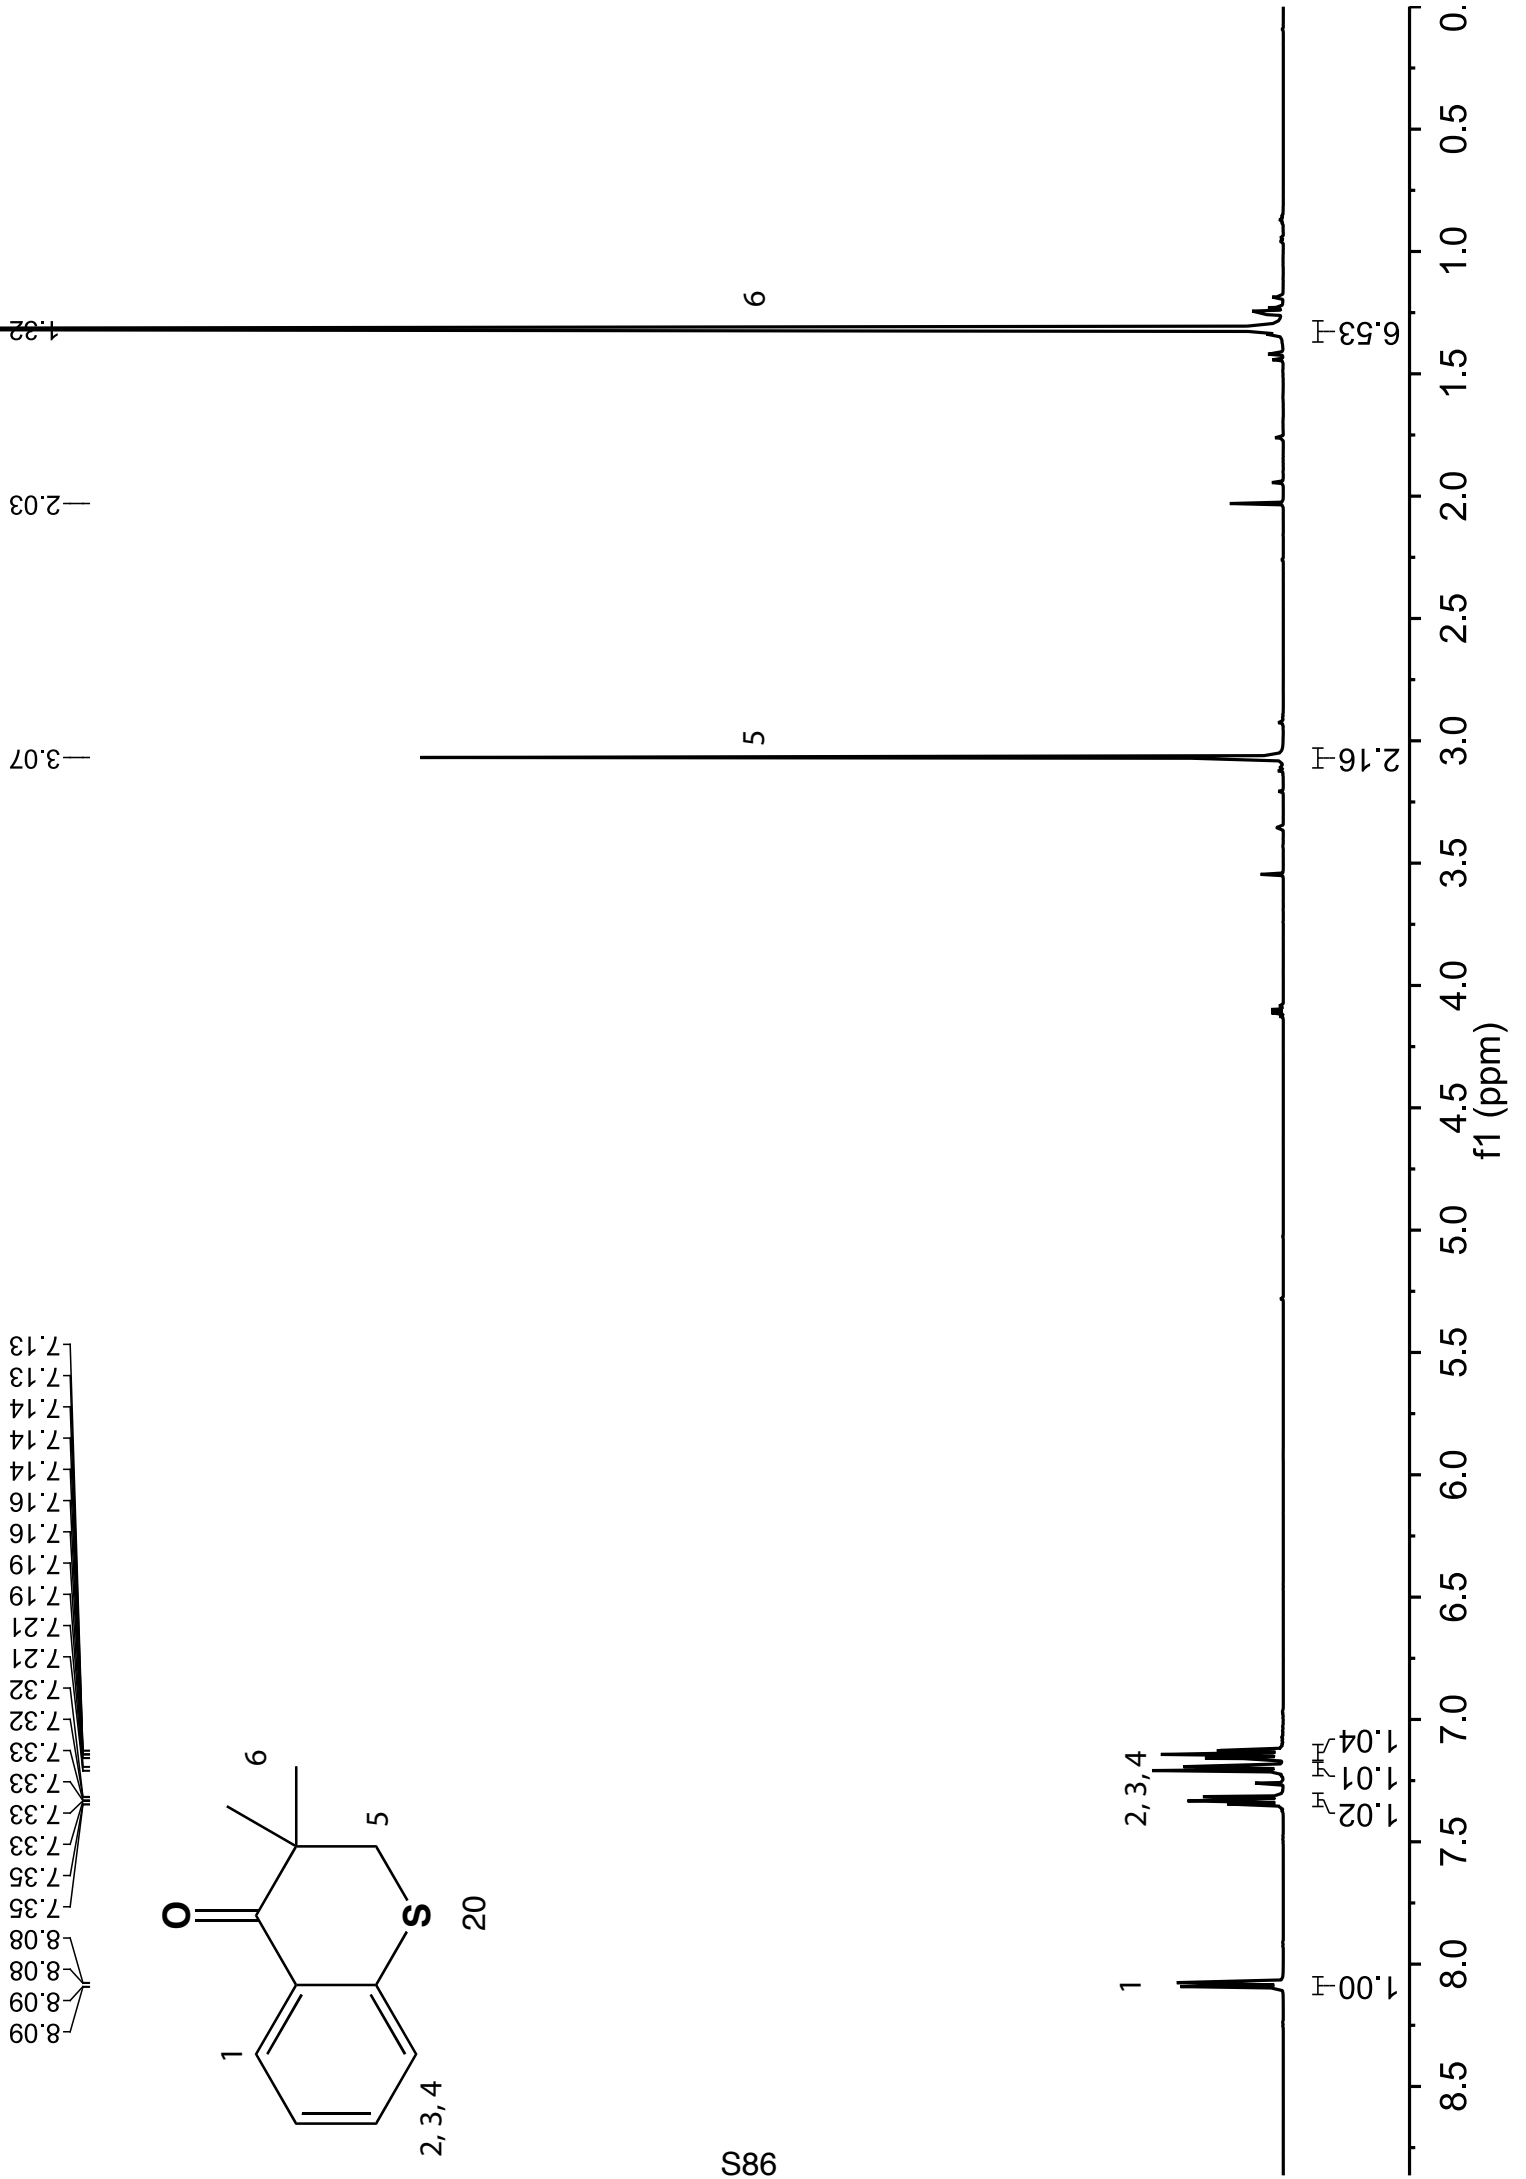

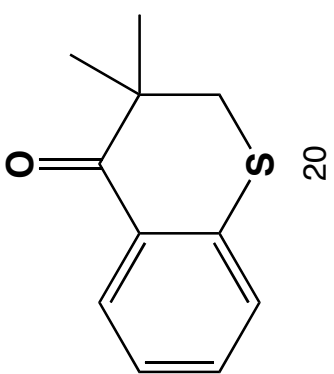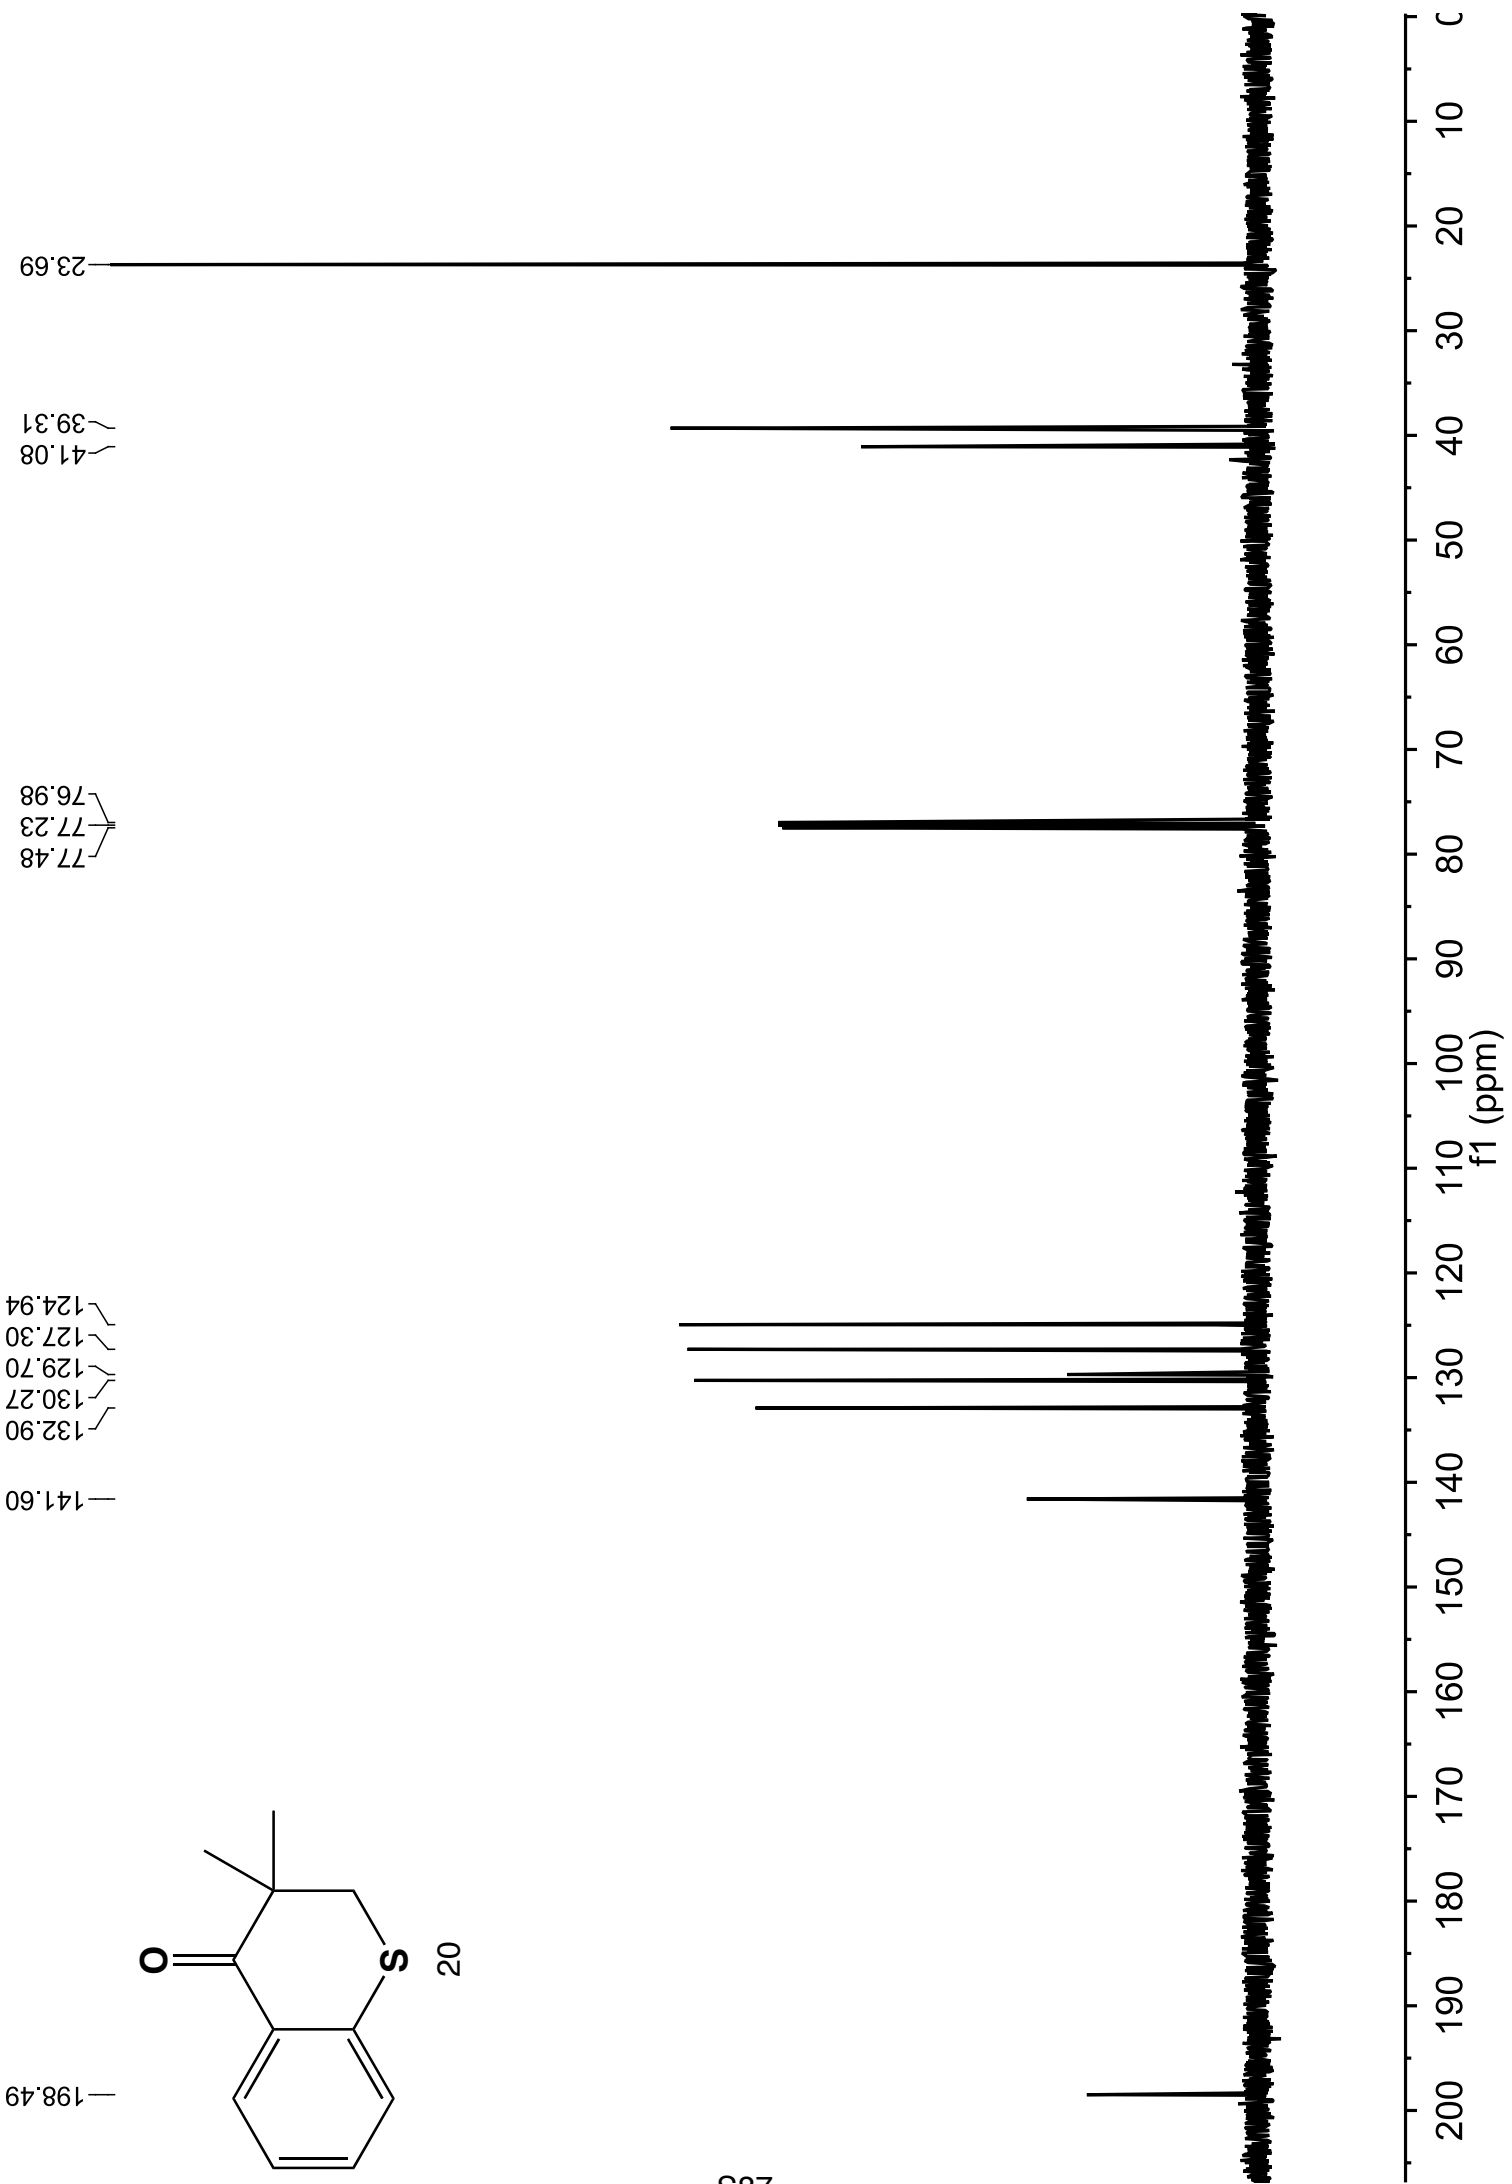

7.39  
7.38  
7.14  
7.13  
7.11  
7.01  
7.00  
6.98

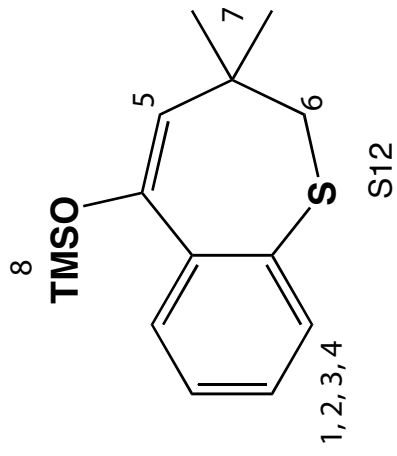

—5.81

—2.77

—1.28

0.28  
0.31

0.89  
1.94  
0.96

0.96

2.00

6.21

8.91

1,2,3,4

5

6

7

8

f1 (ppm)

7.5 7.0 6.5 6.0 5.5 5.0 4.5 4.0 3.5 3.0 2.5 2.0 1.5 1.0 0.5 0.0

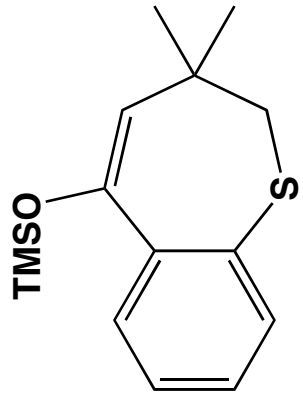

S12

S89

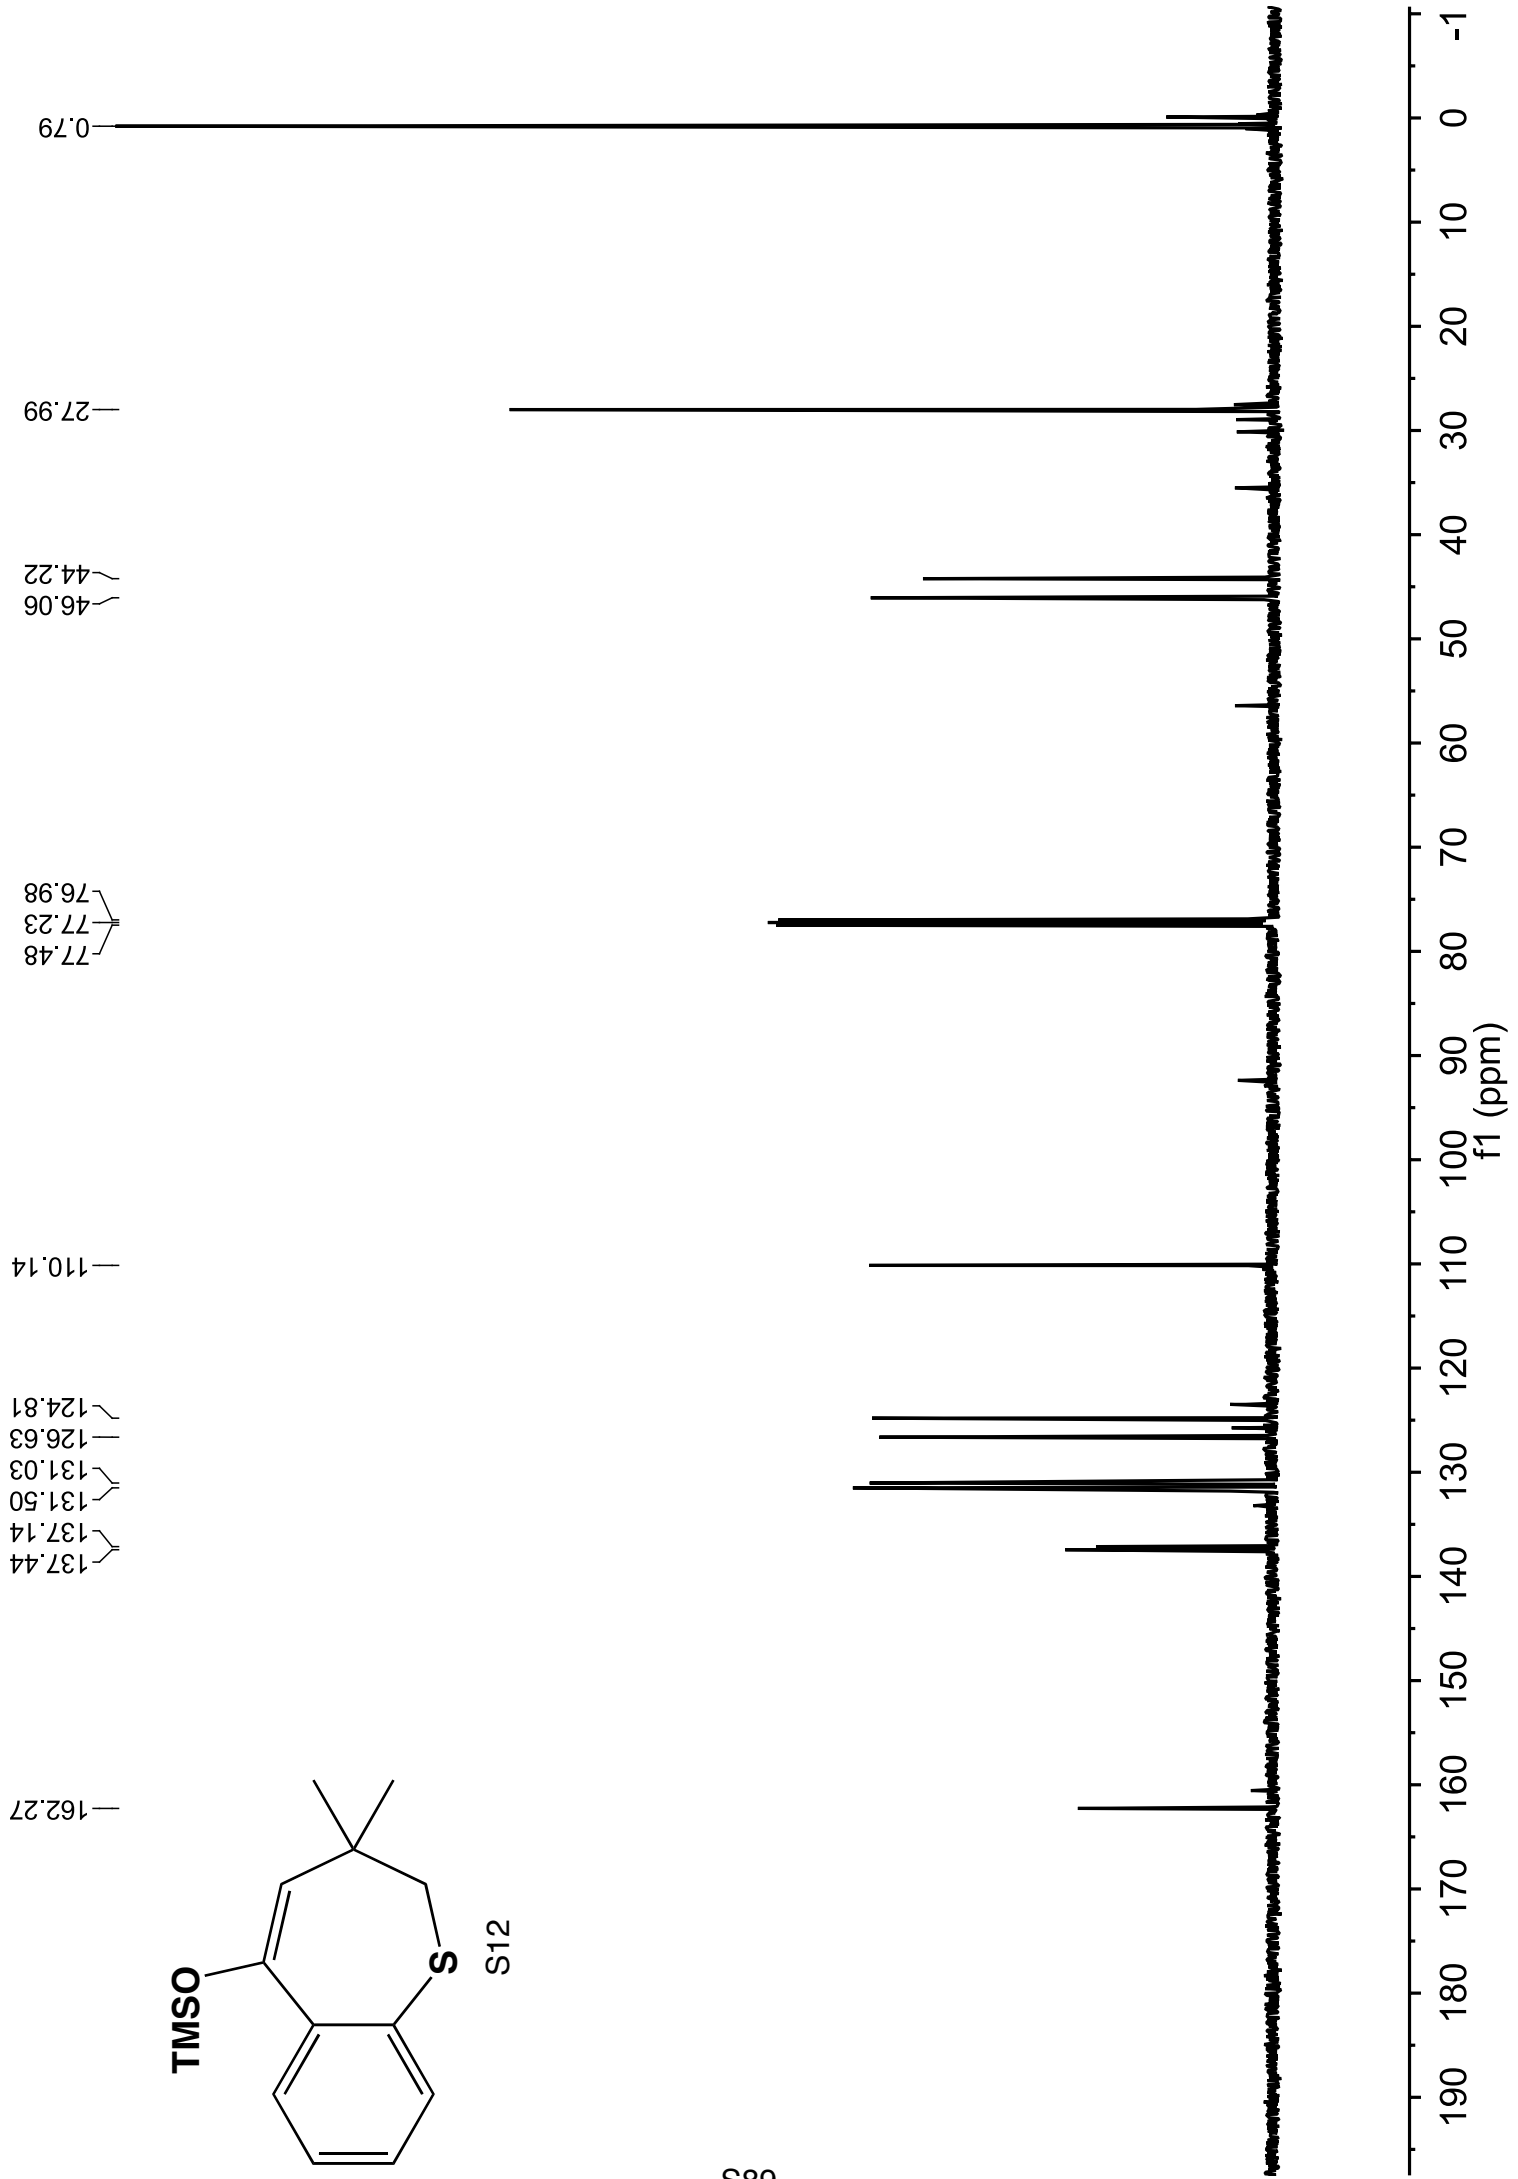

7.47  
7.47  
7.45  
7.45  
7.30  
7.28  
7.26  
7.22  
7.22  
7.20  
7.20  
7.18  
7.16  
7.15  
7.14  
7.14  
7.12  
7.12

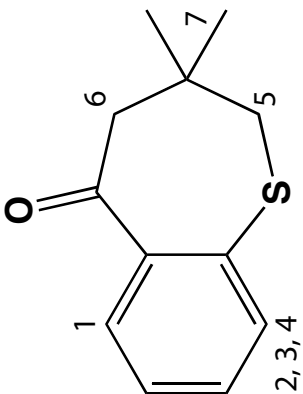

S13

069

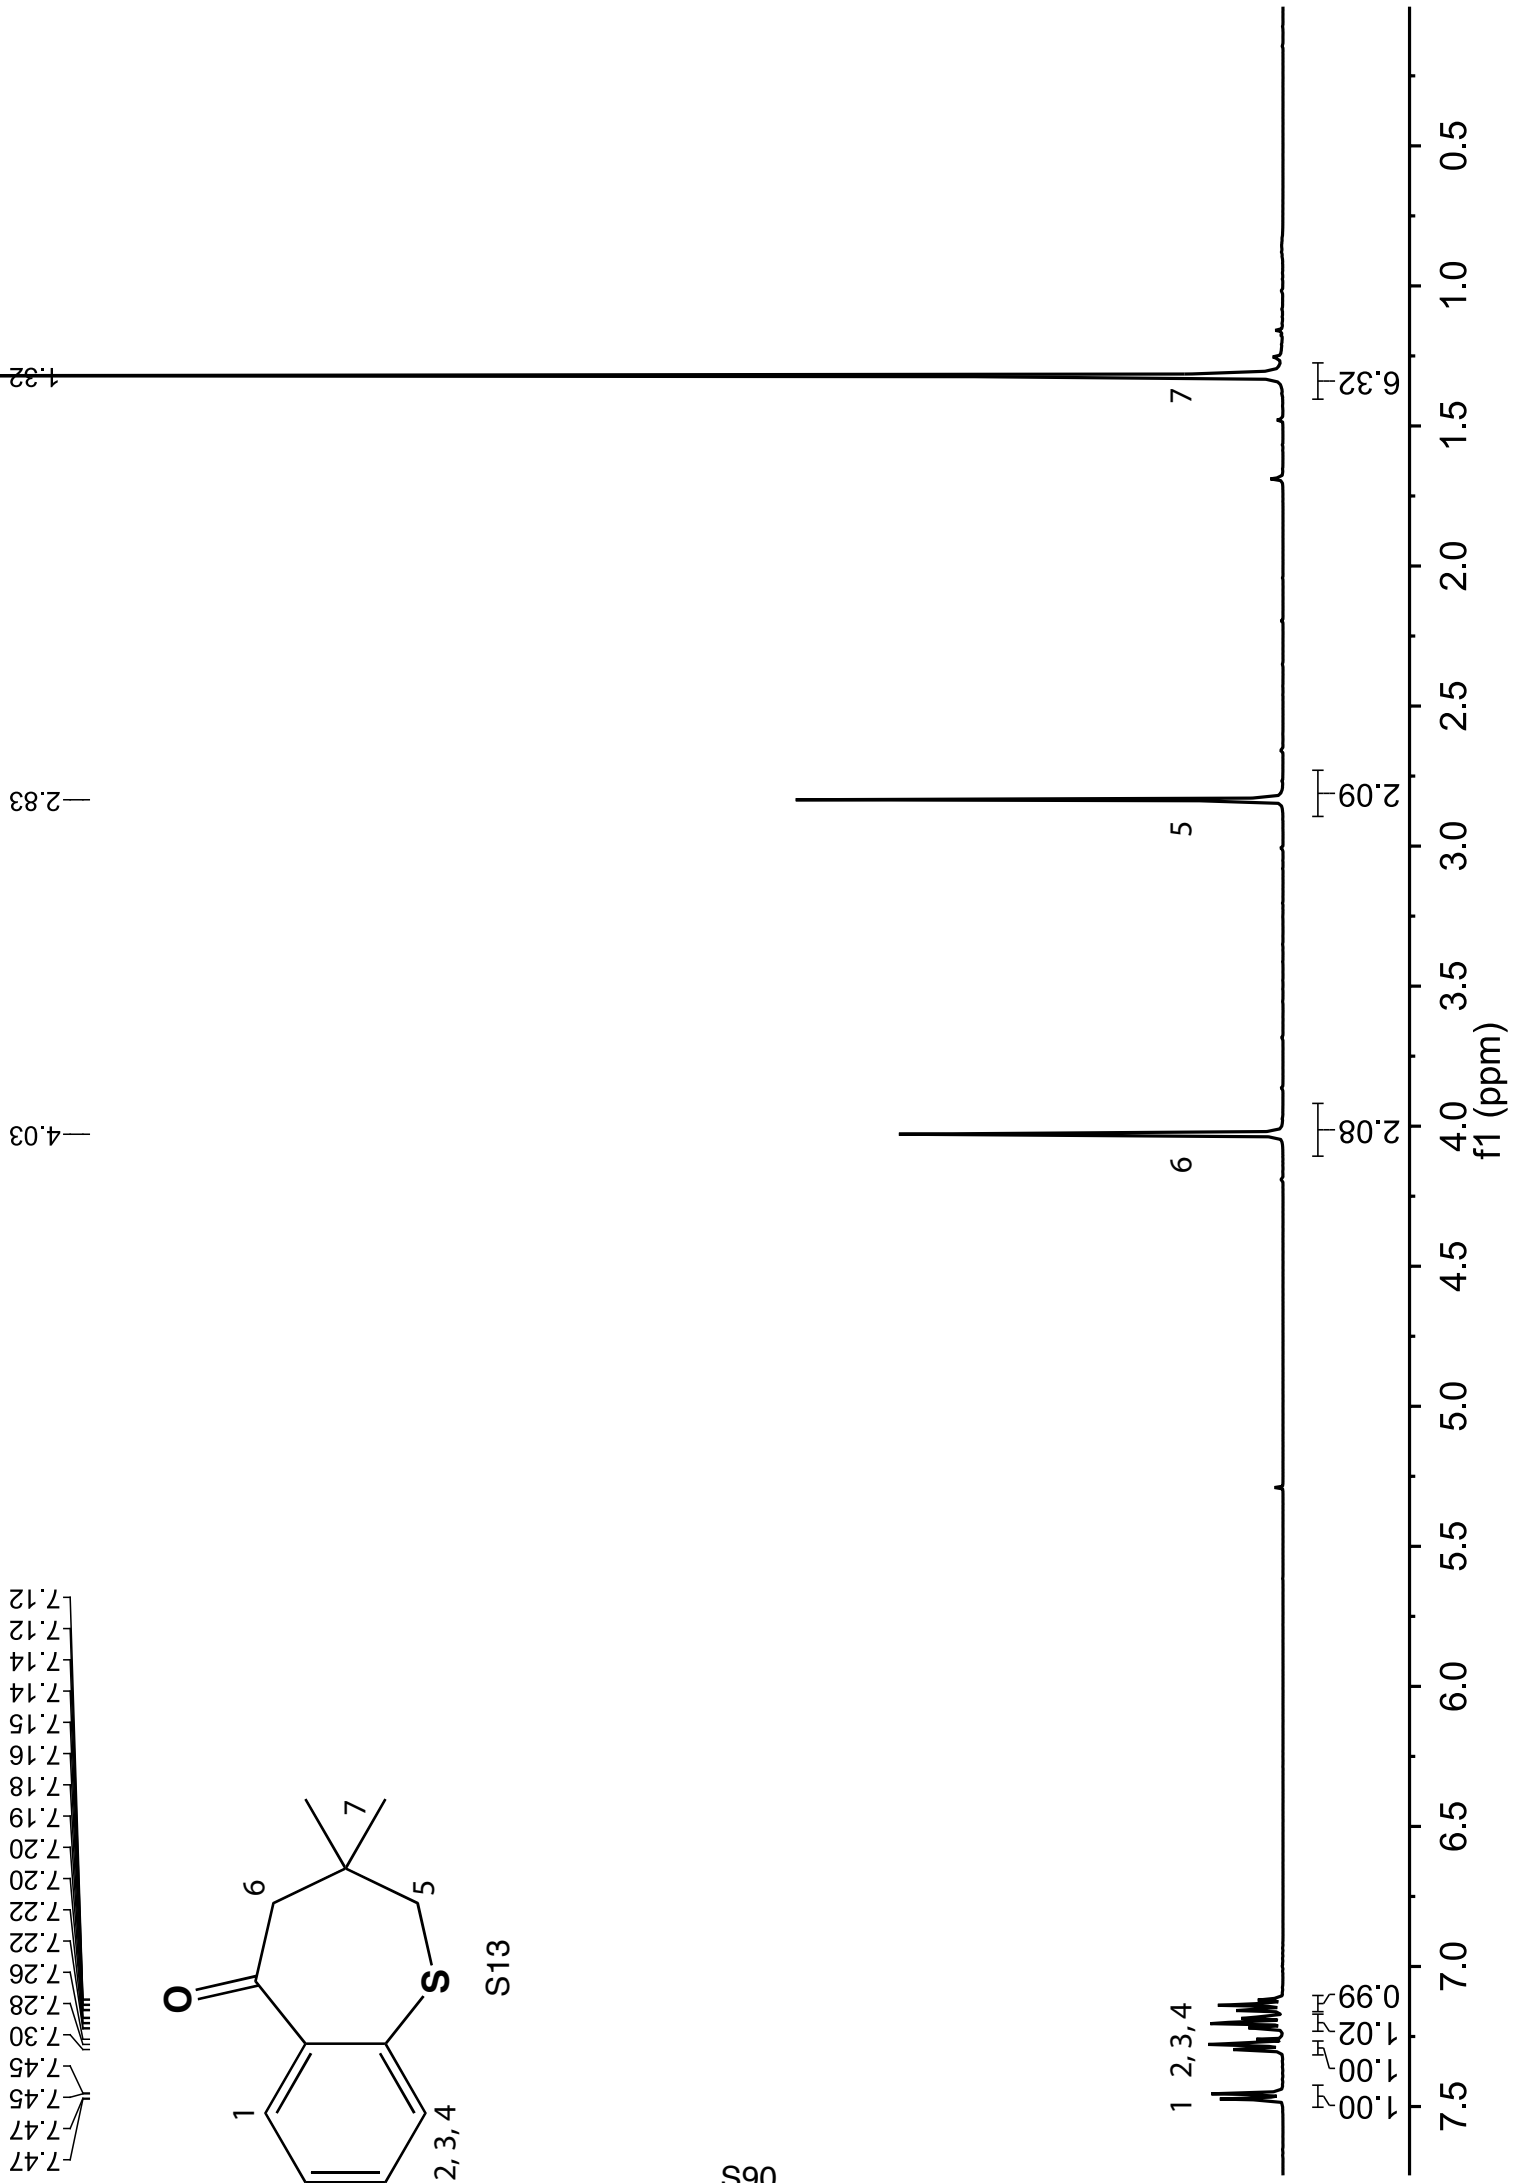

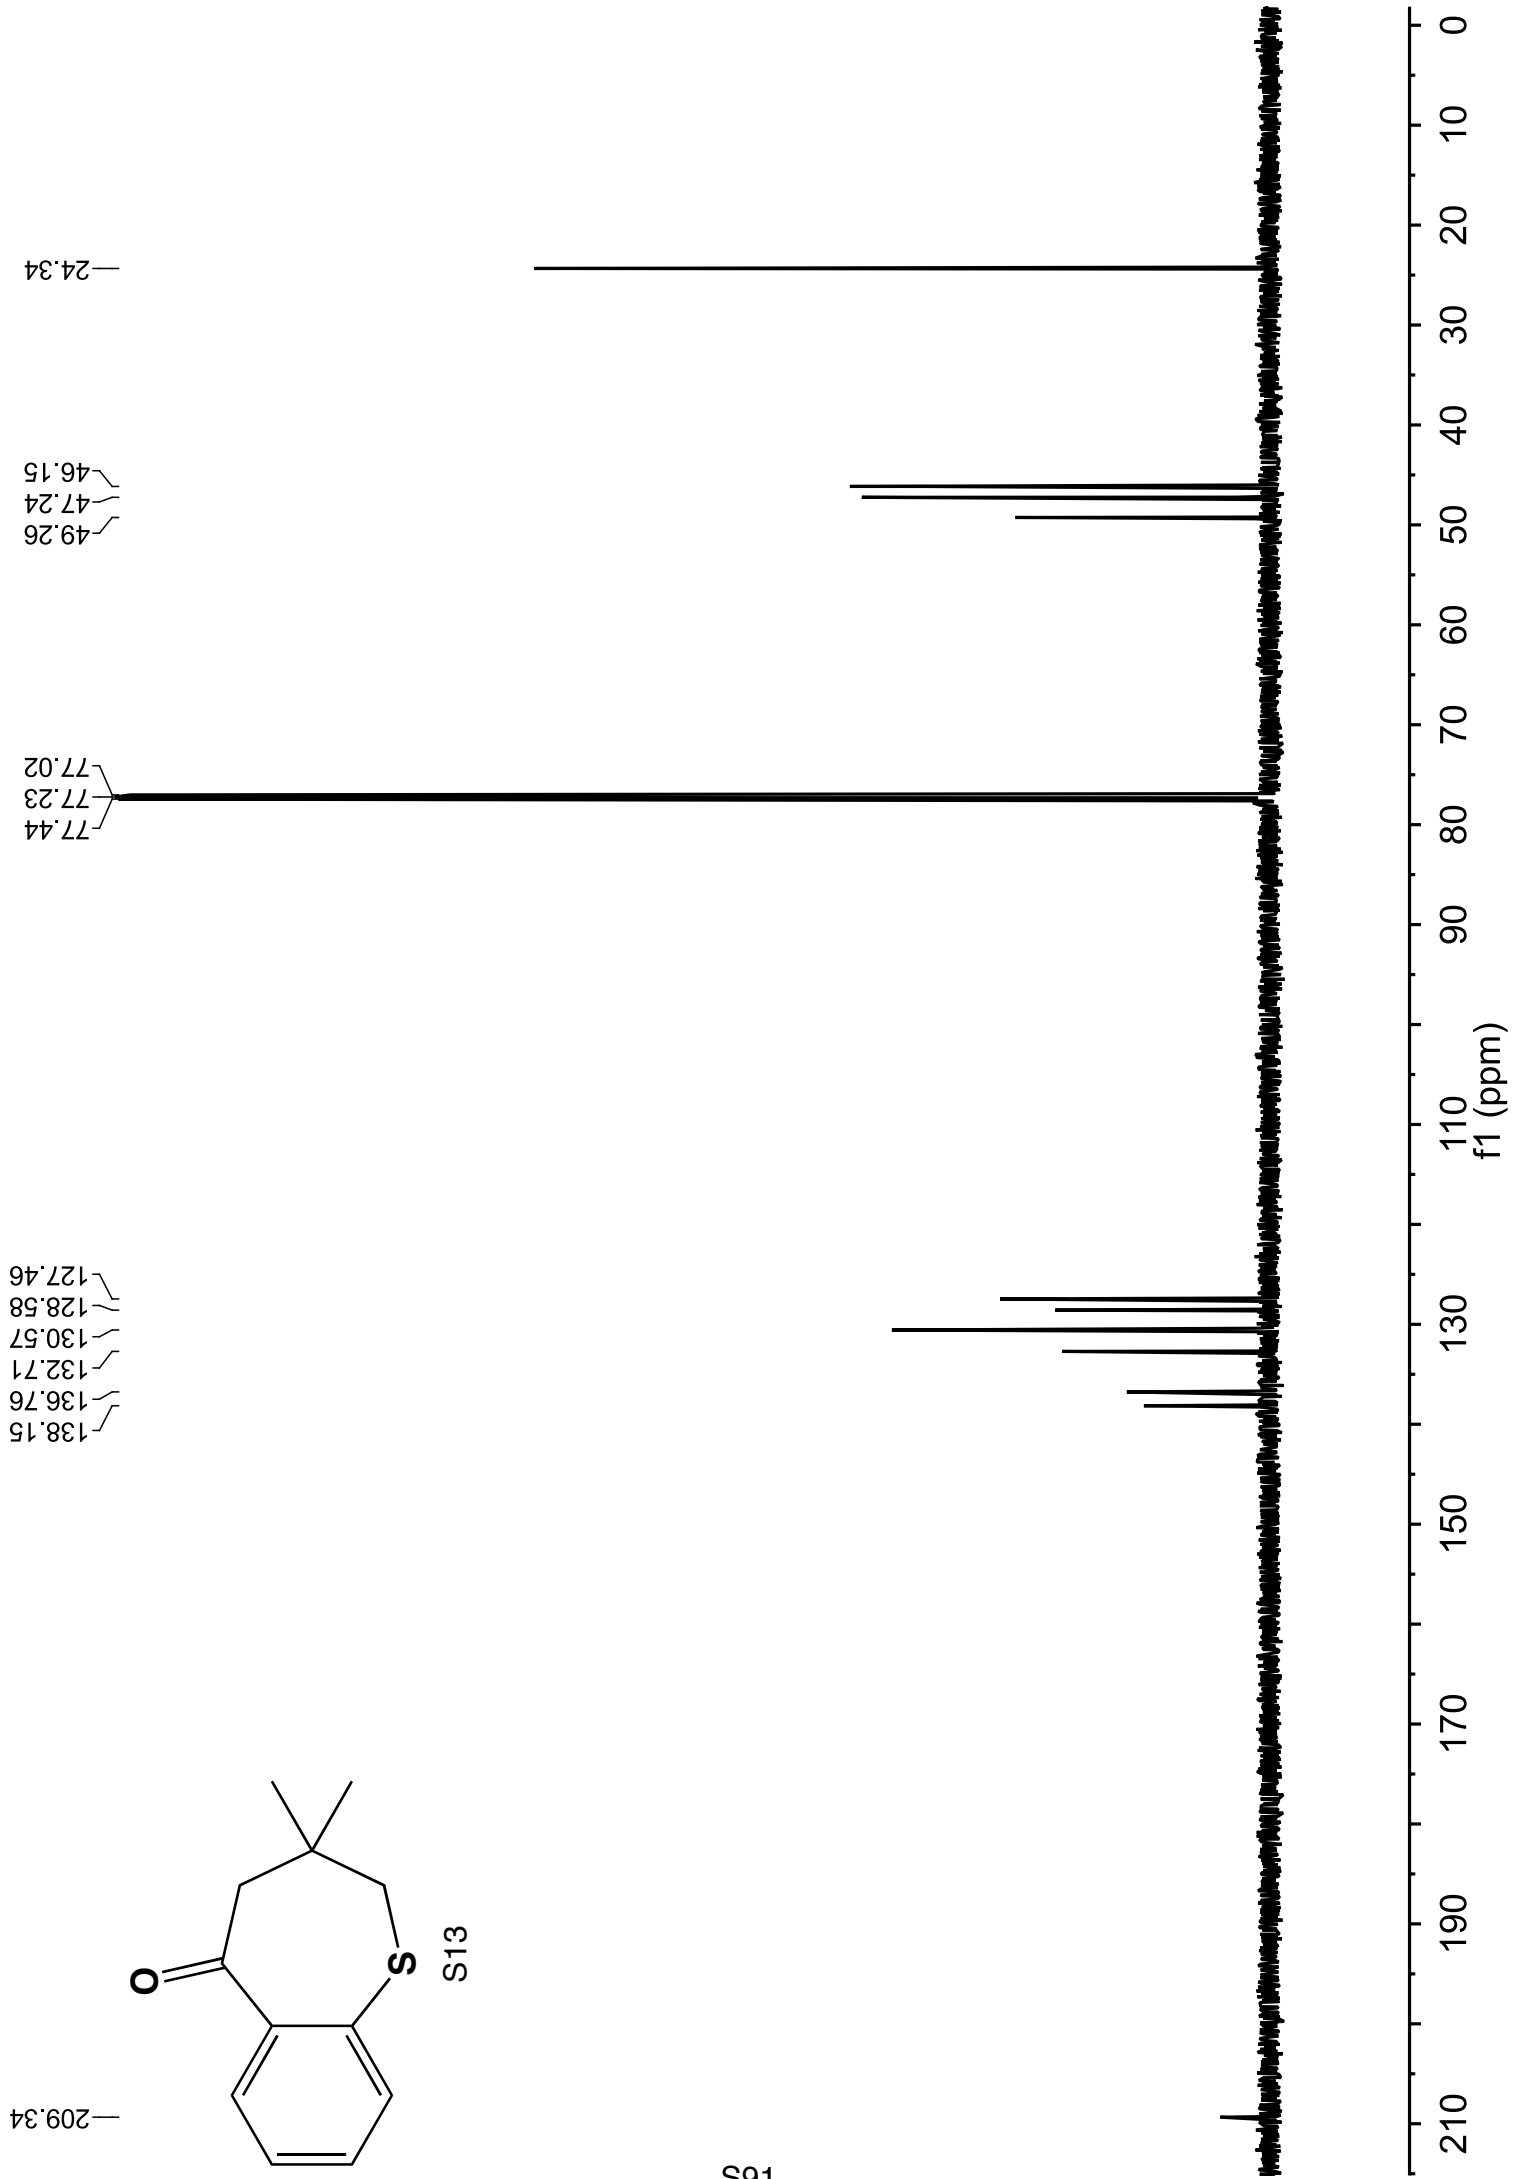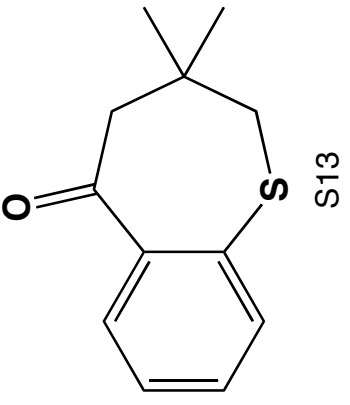

7.48  
7.47  
7.47  
7.28  
7.28  
7.25  
7.25  
7.20  
7.20  
7.29  
6.62

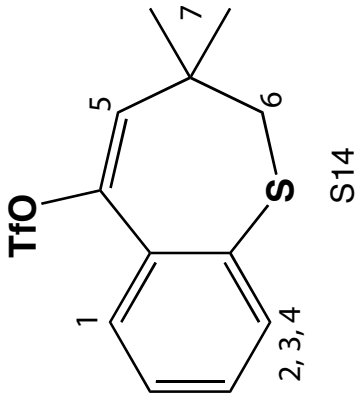

2.86  
1.59  
1.42

269

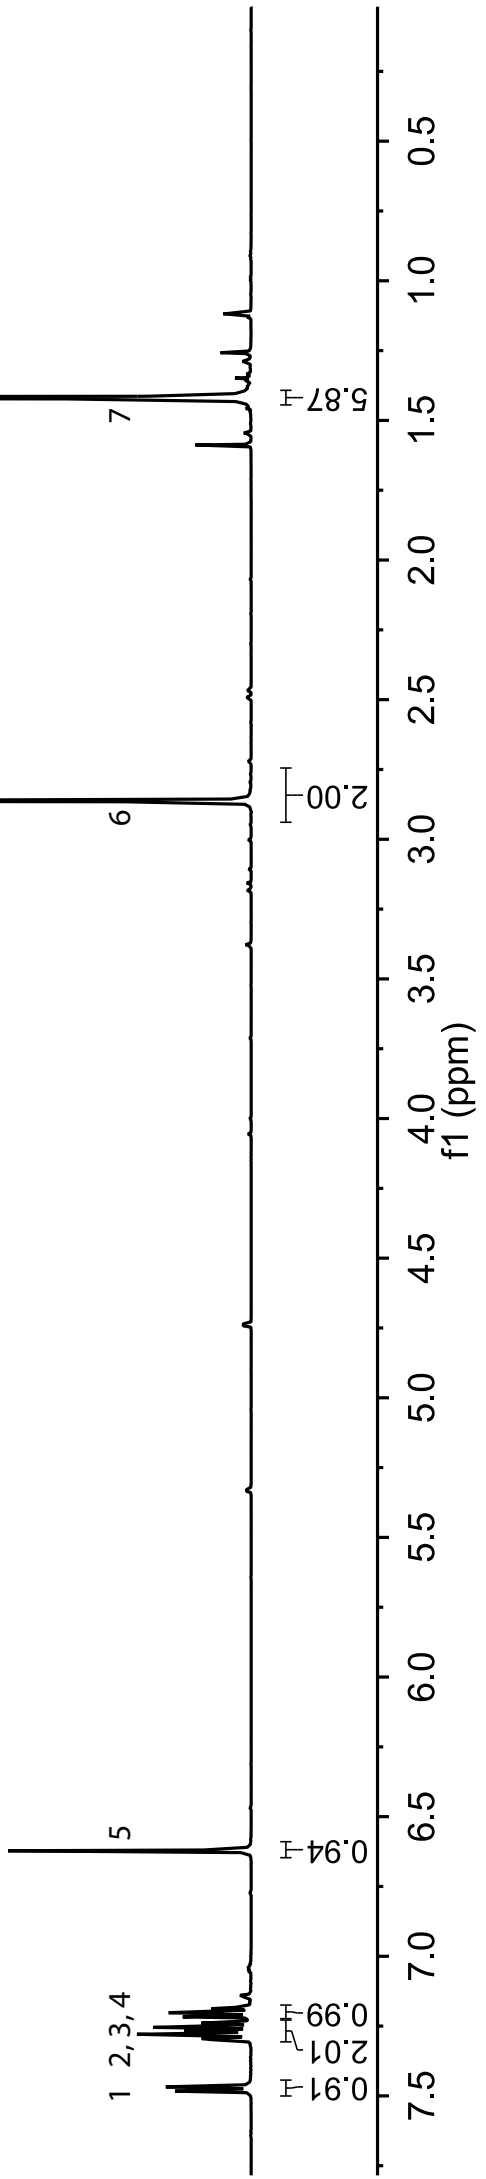



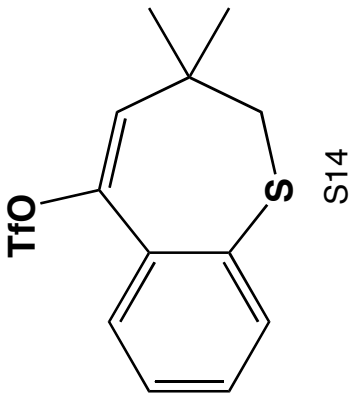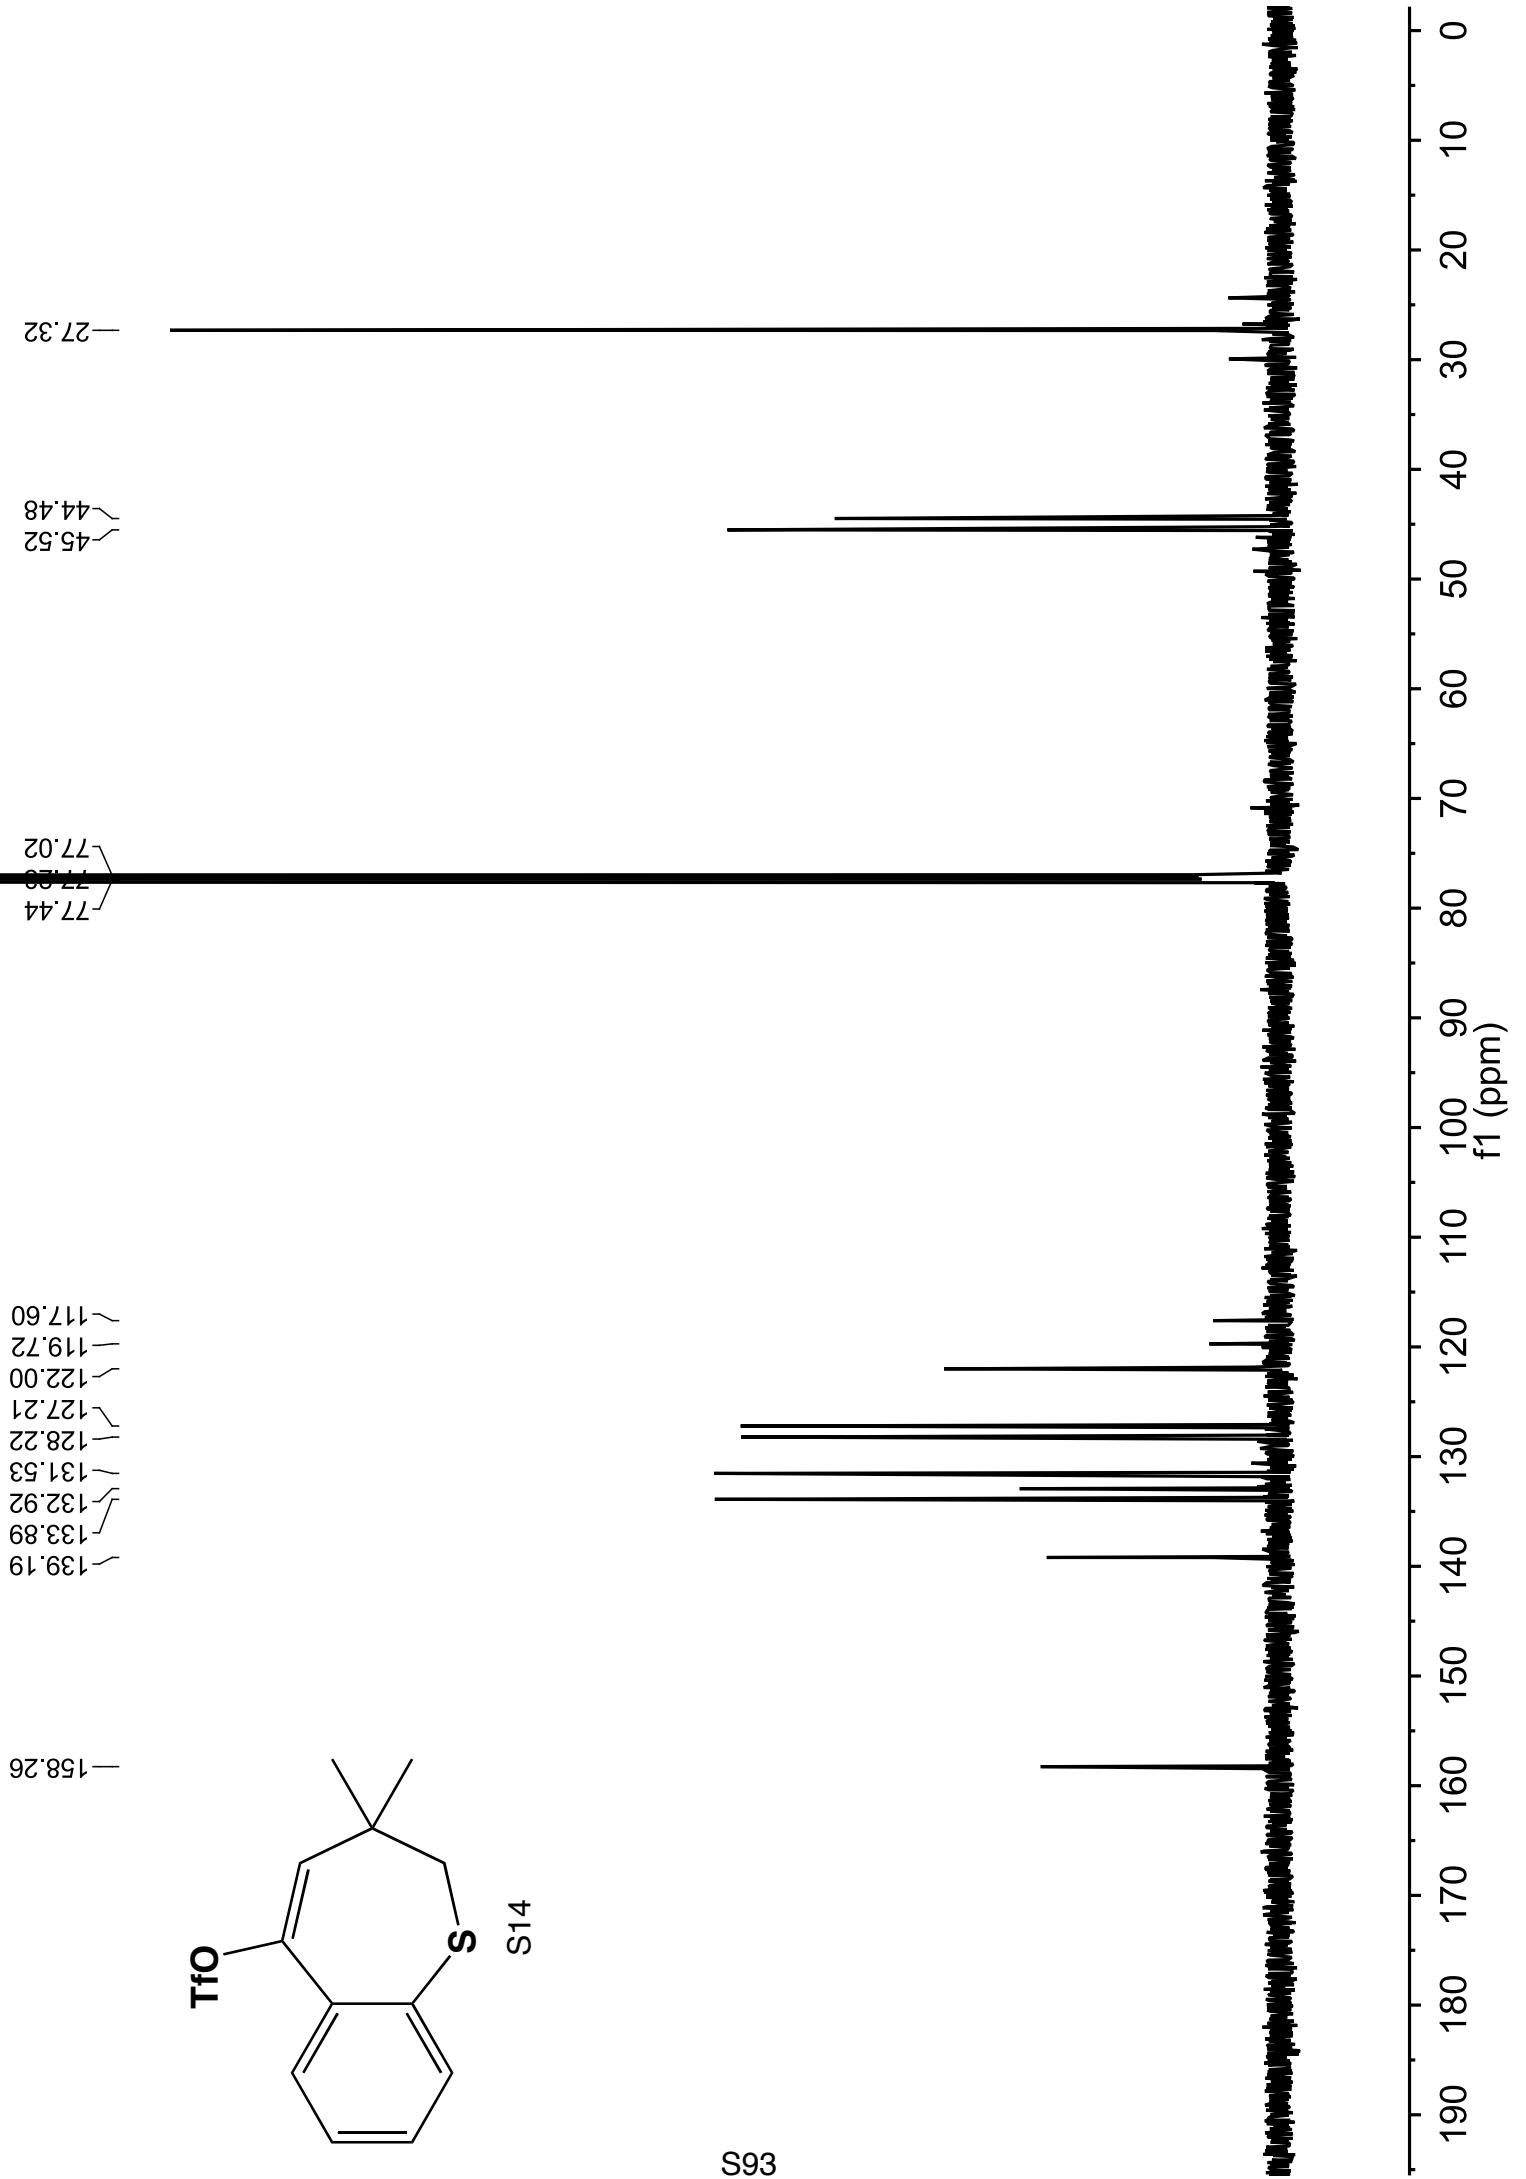

S93

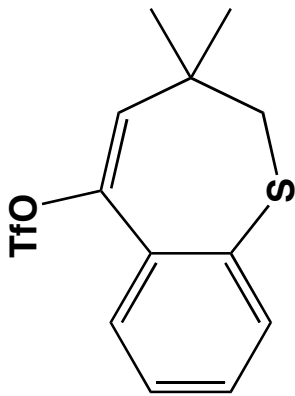

S14

—75.63

S94

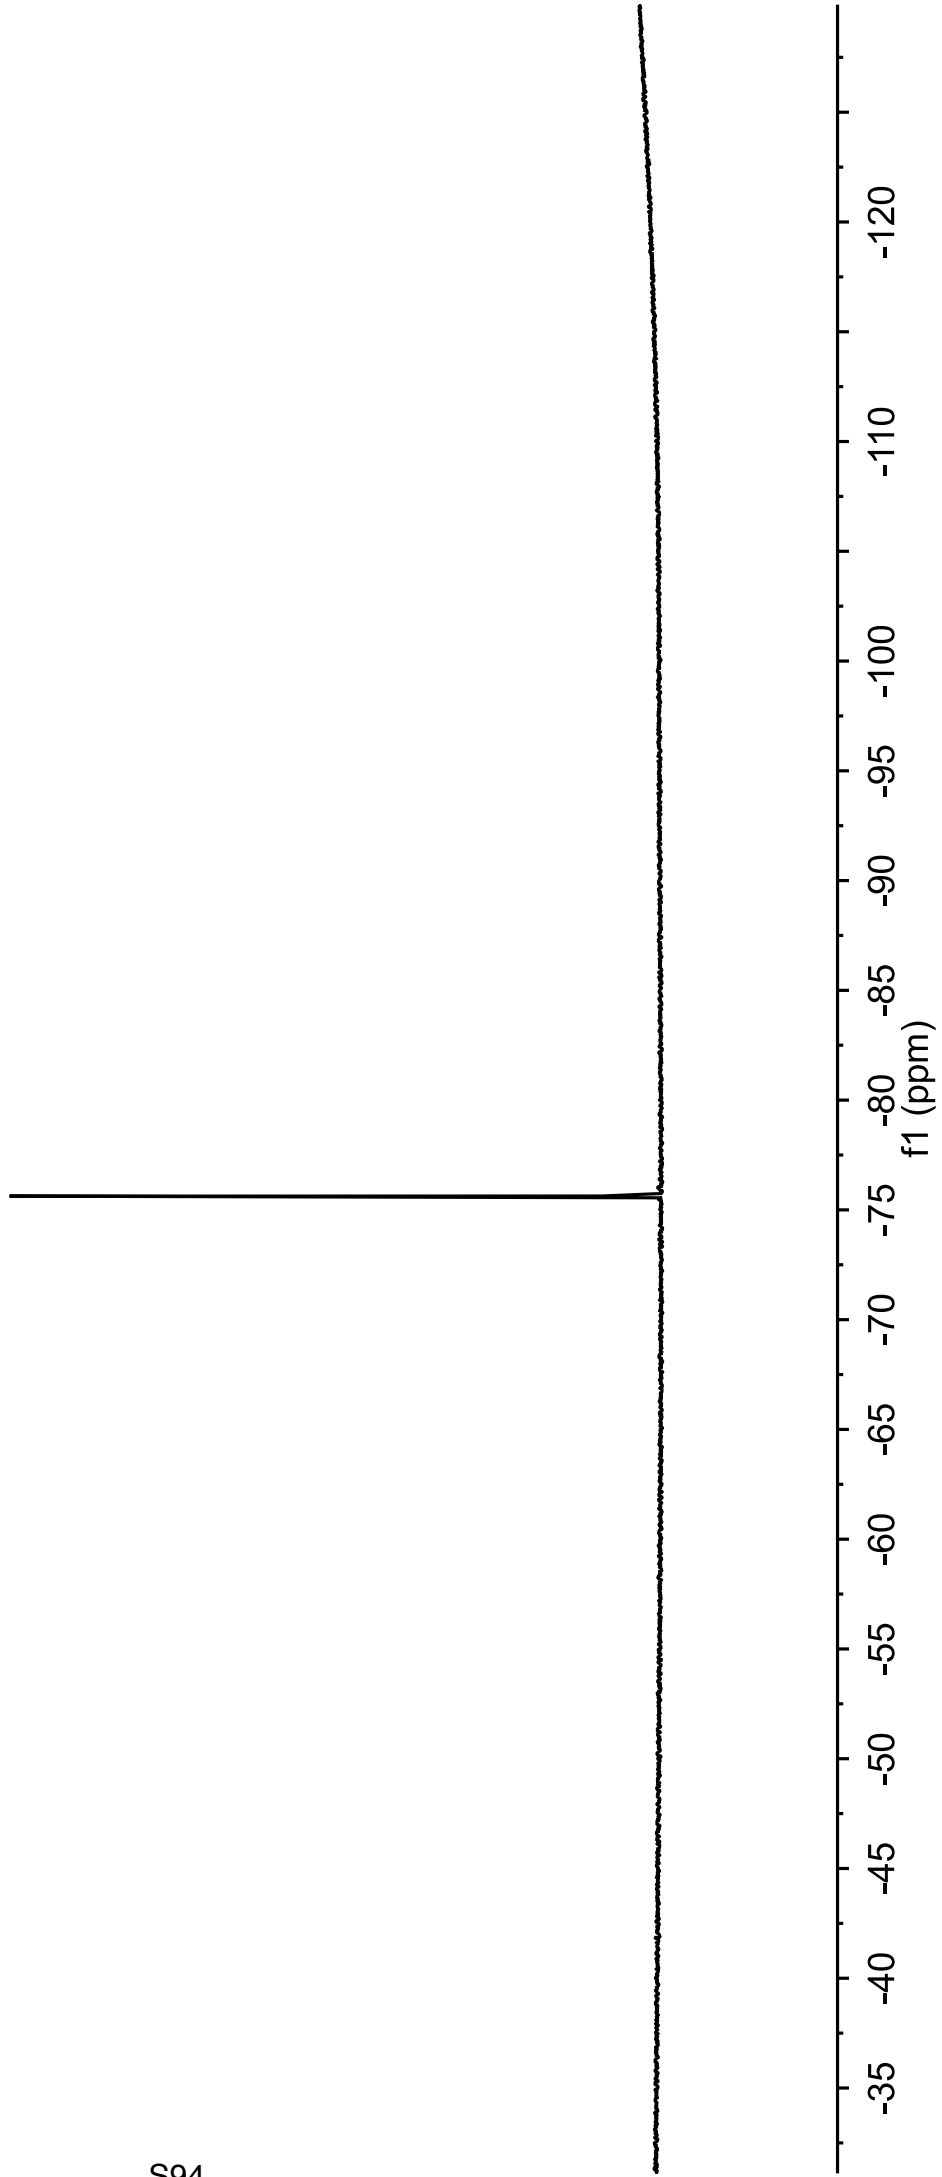



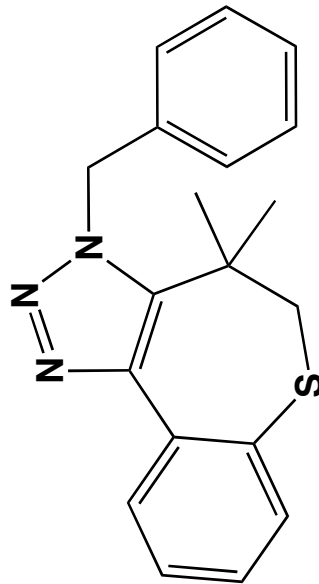

**+ regioisomer**  
S15 + S16

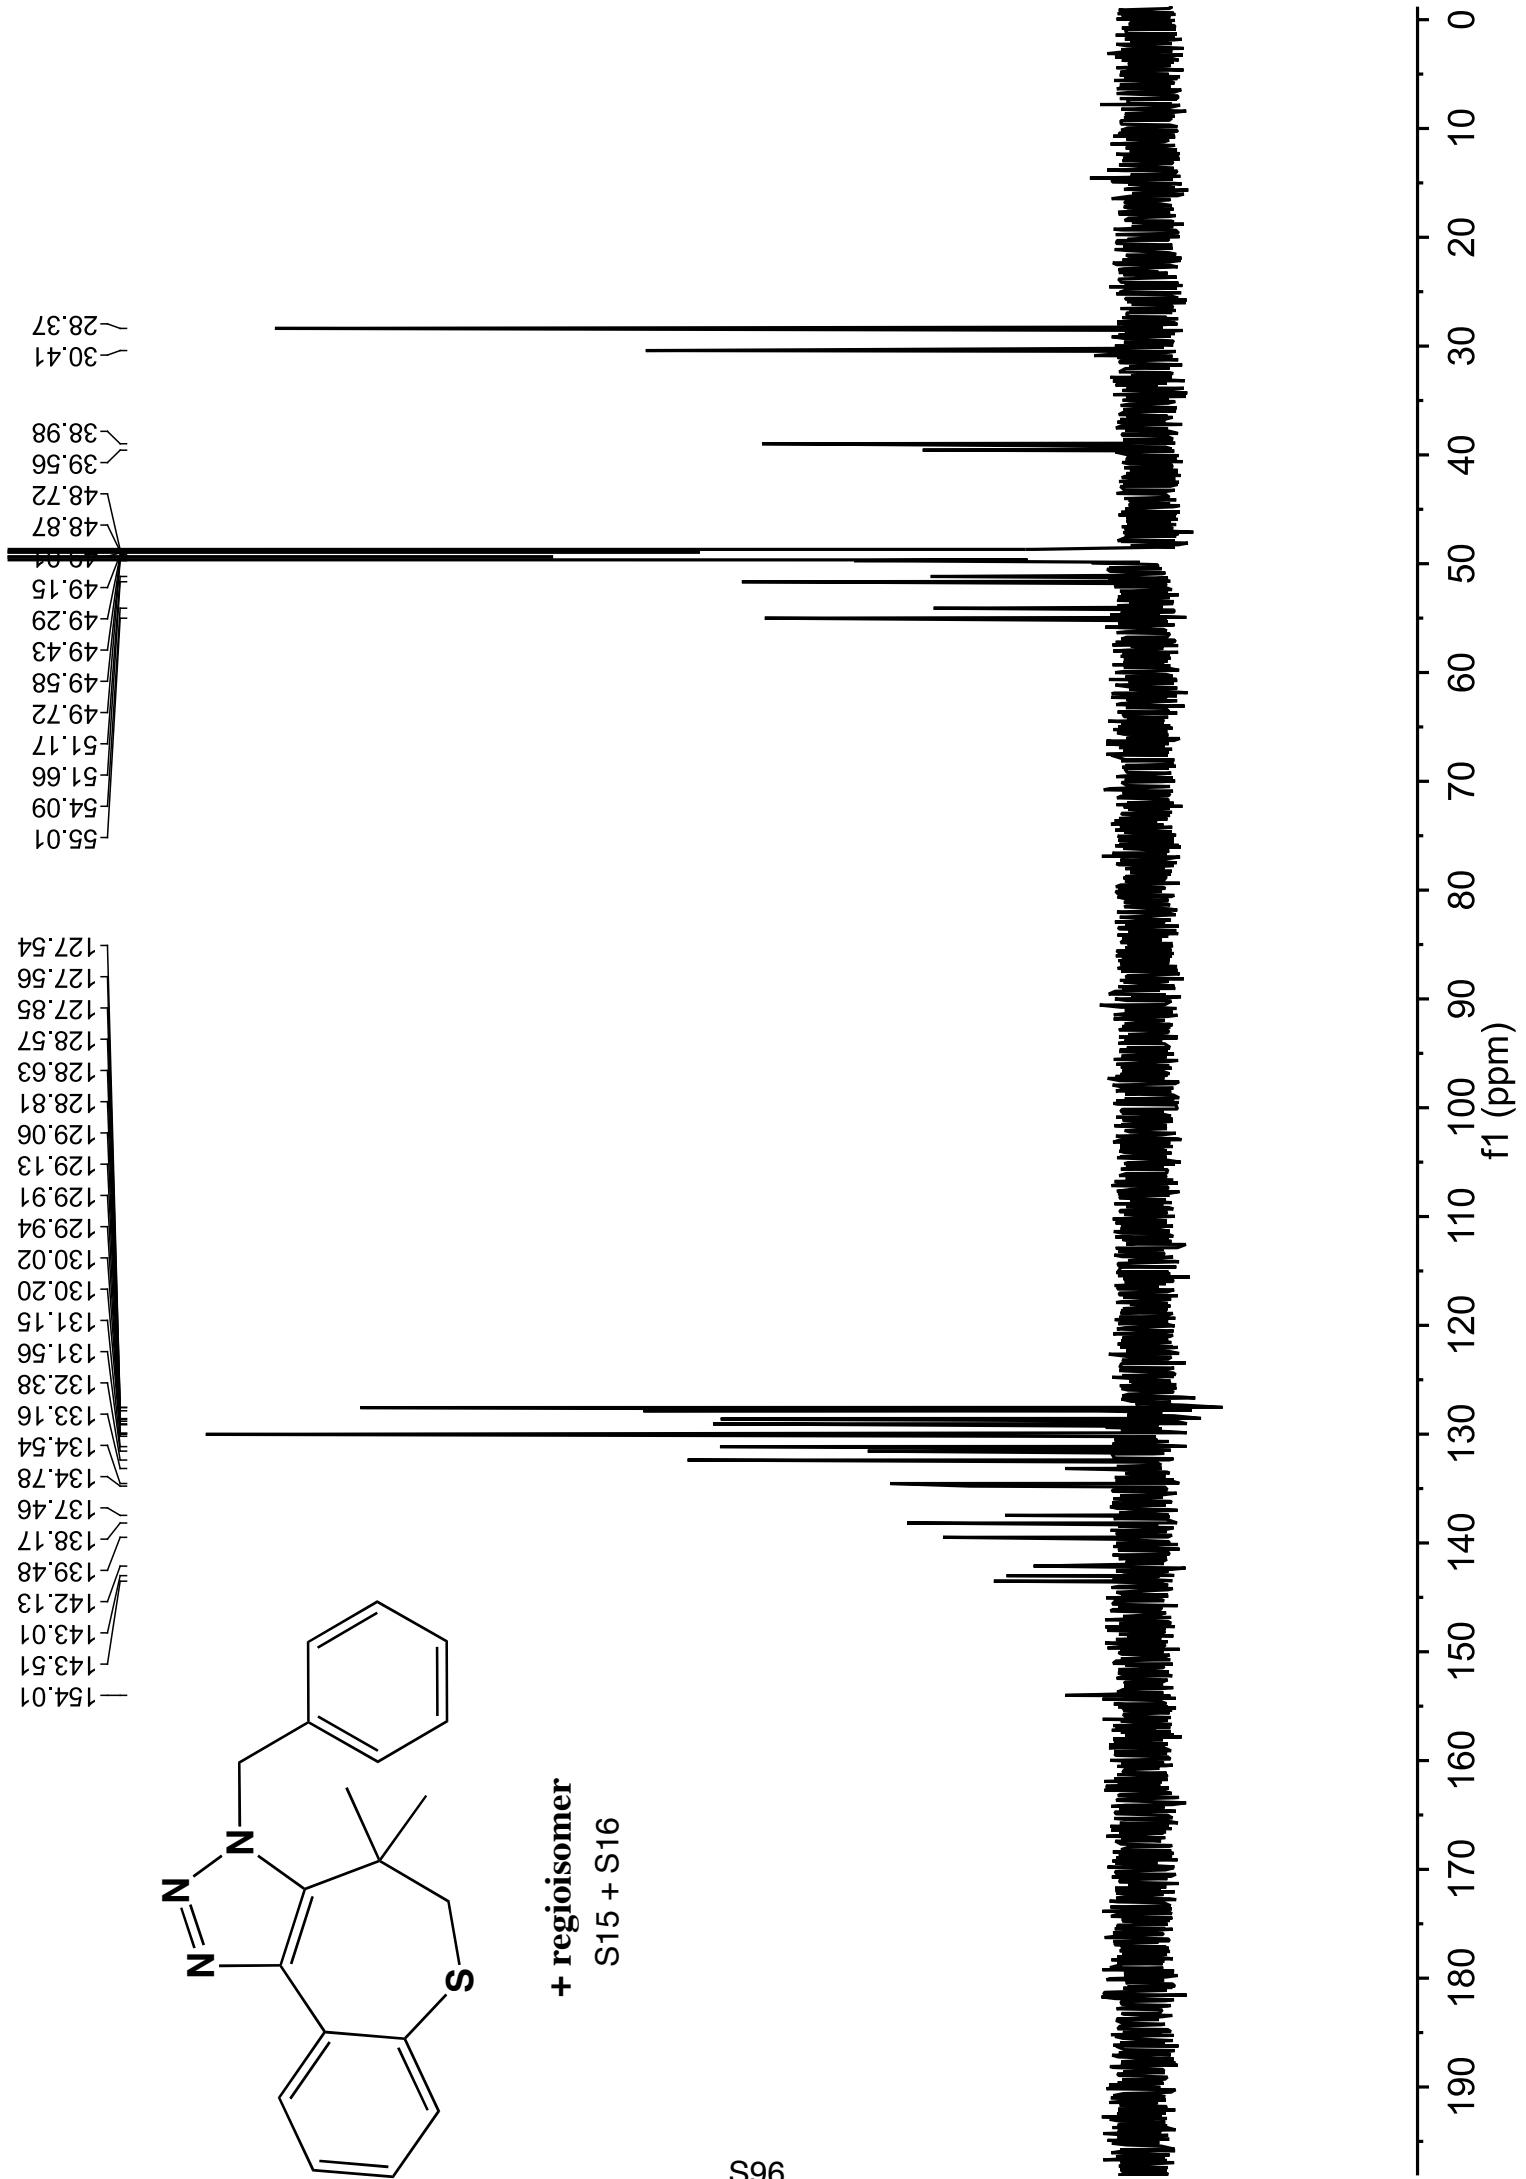

Supplement: anie0051-2443-SD1.pdf [file anie0051-2443-SD1.pdf]
